# Supplementary material for: Visible-light-induced radical cascade cyclization of oxime esters and aryl isonitriles: synthesis of cyclopenta[b]quinoxalines
Source: Royal Society of Chemistry journal article supplement (doi:10.1039/c9cc05655f), 2019-01-01

## Visible-Light-Induced Radical Cascade Cyclization of Oxime Esters

### and Aryl Isonitriles: Synthesis of Cyclopenta[*b*]quinoxalines

Yao Yuan,<sup>†</sup> Wuheng Dong,<sup>‡</sup> Xiaoshuang Gao,<sup>†</sup> Xiaomin Xie,<sup>†</sup> and Zhaoguo Zhang<sup>†§\*</sup>

<sup>†</sup>Shanghai Key Laboratory for Molecular Engineering of Chiral Drugs, School of Chemistry and Chemical Engineering, Shanghai Jiao Tong University, 800 Dongchuan Road, Shanghai 200240, China

<sup>‡</sup>College of Medicine, Guangxi University of Science and Technology, Liuzhou, Guangxi 545006, China

<sup>§</sup>State Key Laboratory of Organometallic Chemistry, Shanghai Institute of Organic Chemistry, Chinese Academy of Sciences, 345 Lingling Road, Shanghai 200032, China

Fax: (+86)-21-5474-8925; phone: (+86)-21-5474-8925; E-mail: [zhaoguo@sjtu.edu.cn](mailto:zhaoguo@sjtu.edu.cn)

#### Contents

|                                                    |    |
|----------------------------------------------------|----|
| 1. General Information .....                       | 2  |
| 2. Preparation of Substrates .....                 | 2  |
| 3. Spectral Data for Substrates and Products ..... | 4  |
| 4. Reference .....                                 | 26 |
| 5. NMR Spectra of Substrates and Products .....    | 27 |

## 1. General Information

Unless otherwise noted, all reactions were carried out under an atmosphere of nitrogen using standard Schlenk techniques. Materials were purchased from commercial suppliers and used without further purification. Anhydrous DMF, DMSO, DCE, and CH<sub>3</sub>CN were freshly distilled from calcium hydride. <sup>1</sup>H NMR, <sup>13</sup>C NMR and <sup>19</sup>F NMR spectra were recorded on 400 MHz and 500 MHz spectrometers. The chemical shifts for <sup>1</sup>H NMR were recorded in ppm downfield from tetramethylsilane (TMS) with the solvent resonance as the internal standard. The chemical shifts for <sup>13</sup>C NMR were recorded in ppm downfield using the central peak of deuteriochloroform (77.00 ppm) as the internal standard. Coupling constants (*J*) are reported in Hz and refer to apparent peak multiplications. HRMS were obtained on an ESI-TOF mass spectrometer. Flash column chromatography was performed on silica gel (300-400 mesh).

## 2. Preparation of Substrates

### 2.1 Preparation of aryl isonitriles<sup>1</sup>

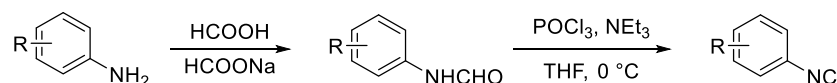

A mixture of aryl amine (1.0 equiv), formic acid (4.0 equiv) and sodium formate (0.2 equiv) in a round-bottom flask was stirred with a magnet at room temperature for 4 hours. Then EtOAc was added to the mixture, and the organic solvent was washed with water and saturated solution of NaHCO<sub>3</sub>. After drying with Na<sub>2</sub>SO<sub>4</sub> the solvent was removed under reduced pressure. The resulting residue was taken on to the next step without further purification.

To a solution of formamide (1.0 equiv) and NEt<sub>3</sub> (3.0 equiv) in anhydrous THF was added dropwise POCl<sub>3</sub> (1.2 equiv) in THF at 0 °C under nitrogen atmosphere over 30min. After keeping 0 °C for 1 hour the reaction mixture was poured into a saturated solution of K<sub>2</sub>CO<sub>3</sub>. Then the mixture was extracted by 2-methoxy-2-methylpropane and the organic phase was dried over Na<sub>2</sub>SO<sub>4</sub> and concentrated in vacuum. The crude product was purified by reduced pressure distillation (or silica-gel column chromatography) to give pure aryl isonitriles.

## 2.2 Preparation of cyclobutanone oxime esters<sup>2</sup>

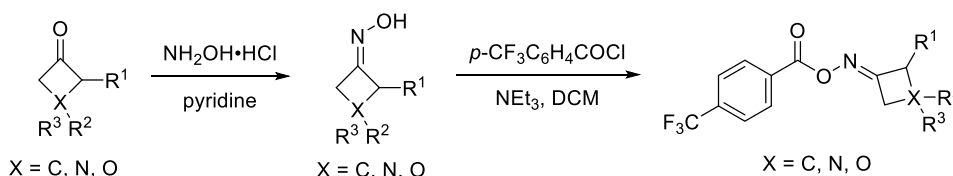

To a stirred solution of cyclobutanones (1.0 equiv) in pyridine (0.5 M) was added hydroxylamine hydrochloride (2.0 equiv) at room temperature. After stirring for 2 hours, pyridine was removed under reduced pressure and the residue was diluted with water and extracted with EtOAc. The aqueous layer was extracted with EtOAc and the combined organic extracts were washed with brine, dried over  $\text{Na}_2\text{SO}_4$ , and concentrated in vacuum to give the crude material without further purification.

To a mixture of cyclobutanone oxime (1.0 equiv), triethylamine (2.0 equiv) and DCM (0.5 M) was added *p*- $\text{CF}_3$ -benzoyl chloride (1.5 equiv) at 0 °C. The progress of the reaction was monitored by TLC. When the reaction finished, water was added to the above solution, and the mixture was diluted with diethyl ether. The organic layer was washed with water and dried over  $\text{Na}_2\text{SO}_4$ . The solvent was removed under reduced pressure and the resulting residue was purified by silica gel column chromatography to give cyclobutanone oxime esters.

## 2.3 A general procedure for the visible-light-induced radical cascade cyclization of oxime esters and aryl isonitriles

An oven dried Schlenk tube equipped with a stirrer bar which was evacuated and backfilled with nitrogen was added aryl isonitriles (0.2 mmol), oxime esters (0.4 mmol),  $\text{Na}_2\text{CO}_3$  (31.8 mg, 0.3 mmol), *fac*- $\text{Ir}(\text{ppy})_3$  (2.6 mg, 2 mol %), DMA (6 mL). The reaction mixture was degassed by the freeze-pump-thaw method and then irradiated with a 7 W blue LED (distance app. 5 cm) for 24 h. The pure products were obtained by silica gel column chromatography.

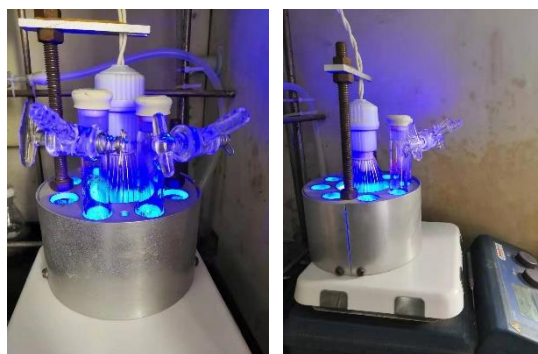

### 3. Spectral Data for Substrates and Products

#### 1-Chloro-4-isocyanobenzene<sup>1</sup>

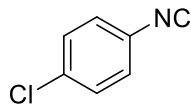

**1a**

White solid, 5.0 g, 72% yield. <sup>1</sup>H NMR (400 MHz, CDCl<sub>3</sub>) δ 7.40 – 7.35 (m, 2H), 7.32 (d, *J* = 8.8 Hz, 2H). <sup>13</sup>C NMR (101 MHz, CDCl<sub>3</sub>) δ 165.7, 135.5, 129.8, 127.7, 125.1 (t, *J* = 14.4 Hz).

#### 1-Bromo-4-isocyanobenzene<sup>1</sup>

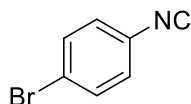

**1b**

White solid, 4.1 g, 85% yield. <sup>1</sup>H NMR (400 MHz, CDCl<sub>3</sub>) δ 7.58 – 7.53 (m, 2H), 7.30 – 7.25 (m, 2H). <sup>13</sup>C NMR (101 MHz, CDCl<sub>3</sub>) δ 165.9, 132.8, 127.9, 125.6 (t, *J* = 13.3 Hz), 123.5.

#### 1-Fluoro-4-isocyanobenzene<sup>1</sup>

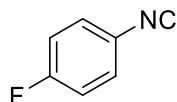

**1c**

Yellow green liquid, 2.7 g (12 mm Hg, 59 °C), 49% yield. <sup>1</sup>H NMR (400 MHz, CDCl<sub>3</sub>) δ 7.41 – 7.34 (m, 2H), 7.12 – 7.04 (m, 2H). <sup>13</sup>C NMR (101 MHz, CDCl<sub>3</sub>) δ 164.4, 163.5, 161.0, 128.3 (d, *J* = 8.8 Hz), 122.8 (td, *J* = 14.0, 3.0 Hz), 116.7, 116.4. <sup>19</sup>F NMR (376 MHz, CDCl<sub>3</sub>) δ -108.8.

#### 1-Isocyano-4-methoxybenzene<sup>1</sup>

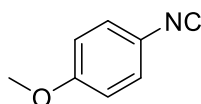

**1d**

Green liquid, 15.6 g, 97% yield. <sup>1</sup>H NMR (400 MHz, CDCl<sub>3</sub>) δ 7.31 (d, *J* = 8.8 Hz, 2H), 6.89 – 6.84 (m, 2H), 3.82 (s, 3H). <sup>13</sup>C NMR (101 MHz, CDCl<sub>3</sub>) δ 162.6, 159.9, 127.7, 119.4 (t, *J* = 14.0 Hz), 114.6, 55.6.



### 1-Isocyano-4-methylbenzene<sup>1</sup>

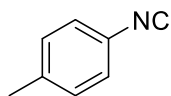

**1e**

Yellow liquid, 2.5 g (9.5 mm Hg, 69 °C). 70% yield. <sup>1</sup>H NMR (400 MHz, CDCl<sub>3</sub>) δ 7.27 (d, *J* = 8.0 Hz, 2H), 7.19 (d, *J* = 8.4 Hz, 2H), 2.39 (s, 3H). <sup>13</sup>C NMR (101 MHz, CDCl<sub>3</sub>) δ 163.3, 139.5, 129.8, 125.9, 123.8 (t, *J* = 13.5 Hz), 21.1.

### 1-Isocyano-4-(trifluoromethoxy)benzene<sup>3</sup>

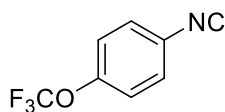

**1f**

Green liquid, 1.2 g, 64% yield. <sup>1</sup>H NMR (400 MHz, CDCl<sub>3</sub>) δ 7.45 (d, *J* = 8.8 Hz, 2H), 7.27 (d, *J* = 8.8 Hz, 2H). <sup>13</sup>C NMR (101 MHz, CDCl<sub>3</sub>) δ 166.1, 149.0, 127.9, 124.9 (t, *J* = 12.7 Hz), 121.7, 120.1 (q, *J* = 256.7 Hz). <sup>19</sup>F NMR (376 MHz, CDCl<sub>3</sub>) δ -58.1.

### 1-Isocyano-4-(trifluoromethyl)benzene<sup>4</sup>

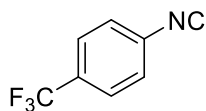

**1g**

Blue liquid, 1.1 g, 64% yield. <sup>1</sup>H NMR (500 MHz, CDCl<sub>3</sub>) δ 7.68 (d, *J* = 8.0 Hz, 2H), 7.50 (d, *J* = 8.0 Hz, 2H). <sup>13</sup>C NMR (126 MHz, CDCl<sub>3</sub>) δ 167.3, 131.4 (q, *J* = 33.6 Hz), 129.4 (t, *J* = 13.8 Hz), 126.9, 126.8 (q, *J* = 3.8 Hz), 123.2 (q, *J* = 273.0 Hz). <sup>19</sup>F NMR (376 MHz, CDCl<sub>3</sub>) δ -63.0.

### 1-(4-Isocyanophenyl)ethan-1-one<sup>1</sup>

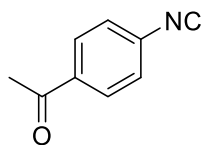

**1h**

Green solid, 1.8 g (2.5 mm Hg, 91 °C), 33% yield. <sup>1</sup>H NMR (400 MHz, CDCl<sub>3</sub>) δ 7.99 – 7.98 (m, 1H), 7.97 – 7.95 (m, 1H), 7.45 (d, *J* = 8.8 Hz, 2H), 2.60 (s, 3H). <sup>13</sup>C NMR (101 MHz, CDCl<sub>3</sub>) δ 196.1, 167.2, 137.2, 129.7, 129.4, 126.5, 26.6.

### 5-Isocyanobenzo[*d*][1,3]dioxole<sup>1</sup>

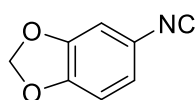

**1i**

White solid, 1.7 g, 83% yield. <sup>1</sup>H NMR (400 MHz, CDCl<sub>3</sub>) δ 6.90 (dd, *J* = 8.0, 1.6 Hz, 1H), 6.82 (d, *J* = 1.6 Hz, 1H), 6.76 (d, *J* = 8.0 Hz, 1H), 6.03 (s, 2H). <sup>13</sup>C NMR (101 MHz, CDCl<sub>3</sub>) δ 162.7, 148.5, 148.1, 120.9, 120.3 (t, *J* = 13.3 Hz), 108.5, 107.3, 102.3.

### 1-Isocyano-3,5-dimethylbenzene<sup>1</sup>

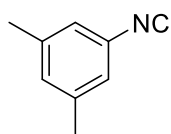

**1j**

Colorless liquid, 4.0 g (4 mm Hg, 67 °C), 76% yield. <sup>1</sup>H NMR (400 MHz, CDCl<sub>3</sub>) δ 7.00 (s, 1H), 6.96 (s, 2H), 2.30 (s, 6H). <sup>13</sup>C NMR (101 MHz, CDCl<sub>3</sub>) δ 163.1, 139.2, 130.9, 126.1 (t, *J* = 13.0 Hz), 123.7, 20.8.

### 1-Isocyanonaphthalene<sup>1</sup>

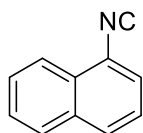

**1k**

Glaucous liquid, 3.0 g, 81% yield. <sup>1</sup>H NMR (400 MHz, CDCl<sub>3</sub>) δ 8.16 (d, *J* = 8.4 Hz, 1H), 7.91 – 7.84 (m, 2H), 7.68 – 7.53 (m, 3H), 7.44 – 7.38 (m, 1H). <sup>13</sup>C NMR (101 MHz, CDCl<sub>3</sub>) δ 167.3, 133.1, 129.5, 128.0, 127.6, 127.5, 127.1, 124.6, 124.1, 123.1 (t, *J* = 13.0 Hz), 122.4.

### 1-Isocyano-2-methylbenzene<sup>1</sup>

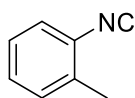

**1l**

Colorless liquid, 2.7 g (5.5 mm Hg, 51.5 °C), 63% yield. <sup>1</sup>H NMR (400 MHz, CDCl<sub>3</sub>) δ 7.35

(d,  $J = 8.0$  Hz, 1H), 7.29 (t,  $J = 6.4$  Hz, 2H), 7.25 – 7.19 (m, 1H), 2.45 (s, 3H).  $^{13}\text{C}$  NMR (101 MHz,  $\text{CDCl}_3$ )  $\delta$  165.8, 134.6, 130.3, 129.1, 126.5, 126.4, 126.3, 18.3.

**1-chloro-2-isocyanobenzene<sup>4</sup>**

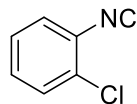

**1m**

Green solid, 6.0 g, 94% yield.  $^1\text{H}$  NMR (500 MHz,  $\text{CDCl}_3$ )  $\delta$  7.45 – 7.37 (m, 2H), 7.36 – 7.25 (m, 2H).  $^{13}\text{C}$  NMR (126 MHz,  $\text{CDCl}_3$ )  $\delta$  169.2, 130.6, 130.3, 130.1, 127.9, 127.6, 125.3 (t,  $J = 15.9$  Hz).

**1-Isocyano-2-methoxybenzene<sup>1</sup>**

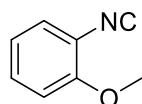

**1n**

Yellow liquid, 1.0 g, 69% yield.  $^1\text{H}$  NMR (400 MHz,  $\text{CDCl}_3$ )  $\delta$  7.37 – 7.32 (m, 2H), 6.97–6.90 (m, 2H), 3.93 (s, 3H).  $^{13}\text{C}$  NMR (101 MHz,  $\text{CDCl}_3$ )  $\delta$  167.7, 155.1, 130.8, 127.8, 120.7, 116.2 (t,  $J = 13.3$  Hz), 112.0, 56.2.

**1-Isocyano-3-methoxybenzene<sup>5</sup>**

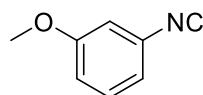

**1o**

Yellow liquid, 1.2 g, 90% yield.  $^1\text{H}$  NMR (400 MHz,  $\text{CDCl}_3$ )  $\delta$  7.28 (t,  $J = 8.0$  Hz, 1H), 6.99 – 6.92 (m, 2H), 6.88 (s, 1H), 3.81 (s, 3H).  $^{13}\text{C}$  NMR (101 MHz,  $\text{CDCl}_3$ )  $\delta$  163.8, 159.8, 130.0, 127.1 (t,  $J = 12.9$  Hz), 118.4, 115.4, 111.6, 55.3.

**1-Chloro-3-isocyanobenzene<sup>5</sup>**

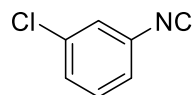

**1p**

Green liquid, 0.8 g, 62% yield.  $^1\text{H}$  NMR (500 MHz,  $\text{CDCl}_3$ )  $\delta$  7.41 – 7.36 (m, 2H), 7.33 (t,  $J$  = 8.0 Hz, 1H), 7.29 – 7.25 (m, 1H).  $^{13}\text{C}$  NMR (101 MHz,  $\text{CDCl}_3$ )  $\delta$  166.0, 135.2, 130.6, 129.9, 127.5 (t,  $J$  = 13.6 Hz), 126.7, 124.7.

**(2-Isocyanophenyl)(methyl)sulfane**<sup>6</sup>

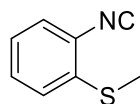

**1q**

Orange liquid, 6.0 g, 91% yield.  $^1\text{H}$  NMR (400 MHz,  $\text{CDCl}_3$ ):  $\delta$  7.34 – 7.24 (m, 2H), 7.18 (d,  $J$  = 8.0 Hz, 1H), 7.09 (t,  $J$  = 7.6 Hz, 1H), 2.46 (s, 3H).  $^{13}\text{C}$  NMR (101 MHz,  $\text{CDCl}_3$ ):  $\delta$  168.2, 136.2, 129.4, 126.6, 125.1, 124.8, 124.0, 14.5.

**2-Benzylcyclobutan-1-one O-(4-(trifluoromethyl)benzoyl) oxime**<sup>2</sup>

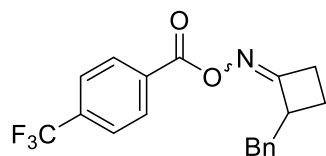

**2a**

White solid, 1.2 g, 72% yield. M.P.: 50.4-51.2 °C.  $^1\text{H}$  NMR (500 MHz,  $\text{CDCl}_3$ )  $\delta$  8.15 (d,  $J$  = 8.0 Hz, 2H), 7.70 (d,  $J$  = 8.5 Hz, 2H), 7.32 – 7.28 (m, 2H), 7.25 – 7.19 (m, 3H), 3.70 (dtq,  $J$  = 7.0, 5.0, 4.0, 2.5 Hz, 1H), 3.26 (dd,  $J$  = 14.0, 5.0 Hz, 1H), 3.09 – 2.90 (m, 3H), 2.16 (dtd,  $J$  = 11.0, 9.5, 6.0 Hz, 1H), 1.88 (ddt,  $J$  = 11.5, 9.5, 7.0 Hz, 1H).  $^{13}\text{C}$  NMR (126 MHz,  $\text{CDCl}_3$ ):  $\delta$  172.3, 162.8, 138.4, 134.5 (q,  $J$  = 32.7 Hz), 132.4, 129.9, 128.8, 128.5, 126.5, 125.5 (q,  $J$  = 3.8 Hz,  $\text{CF}_3$ ), 123.5 (q,  $J$  = 273.3 Hz), 46.4, 37.8, 29.0, 20.5.  $^{19}\text{F}$  NMR (376 MHz,  $\text{CDCl}_3$ )  $\delta$  -63.1.

**2-Methylcyclobutan-1-one O-(4-(trifluoromethyl)benzoyl) oxime**<sup>2</sup>

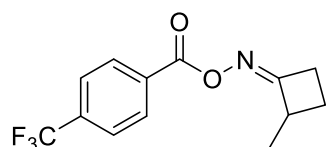

**2b**

White solid, 1.0 g, 77% yield. M.P.: 55.3-56.0 °C.  $^1\text{H}$  NMR (500 MHz,  $\text{CDCl}_3$ )  $\delta$  8.12 (d,  $J$  = 7.0 Hz, 2H), 7.68 (d,  $J$  = 6.5 Hz, 2H), 3.55 – 3.42 (m, 1H), 3.12 (dddq,  $J$  = 18.0, 10.0, 5.0, 2.5 Hz, 1H), 3.06 – 2.94 (m, 1H), 2.28 (tt,  $J$  = 11.0, 5.5 Hz, 1H), 1.69 (tdd,  $J$  = 11.0, 6.5, 2.5 Hz, 1H), 1.36 (tt,  $J$  = 7.0, 3.0 Hz, 3H).  $^{13}\text{C}$  NMR (126 MHz,  $\text{CDCl}_3$ ):  $\delta$  173.9, 162.9, 134.6 (q,  $J$  =

32.7 Hz), 132.6, 130.0, 125.5 (q,  $J = 3.8$  Hz,  $\text{CF}_3$ ), 123.6 (q,  $J = 272.8$  Hz), 40.6, 29.2, 22.8, 17.5.  $^{19}\text{F}$  NMR (471 MHz,  $\text{CDCl}_3$ )  $\delta$  -63.2.

### 2-Ethylcyclobutan-1-one *O*-(4-(trifluoromethyl)benzoyl) oxime<sup>7</sup>

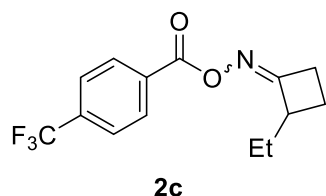

White solid, 1.2 g, 84% yield. M.P.: 42.2-43.8 °C.  $^1\text{H}$  NMR (500 MHz,  $\text{CDCl}_3$ )  $\delta$  8.14 (d,  $J = 8.0$  Hz, 2H), 7.73 (d,  $J = 8.0$  Hz, 2H), 3.43 (dddd,  $J = 14.0, 10.5, 5.5, 3.0, 1.5$  Hz, 1H), 3.09 – 2.95 (m, 2H), 2.19 (dtd,  $J = 11.5, 9.5, 6.5$  Hz, 1H), 1.95 (dddd,  $J = 15.0, 12.5, 7.5, 5.0$  Hz, 1H), 1.76 (dddd,  $J = 14.0, 9.0, 6.5, 2.5$  Hz, 2H), 0.99 (t,  $J = 7.5$  Hz, 3H).  $^{13}\text{C}$  NMR (126 MHz,  $\text{CDCl}_3$ ):  $\delta$  172.2, 163.1, 134.8 (q,  $J = 32.7$  Hz), 132.6, 130.0, 125.7 (q,  $J = 3.8$  Hz,  $\text{CF}_3$ ), 123.7 (q,  $J = 272.8$  Hz), 47.8, 29.0, 24.6, 19.4, 11.1.  $^{19}\text{F}$  NMR (471 MHz,  $\text{CDCl}_3$ )  $\delta$  -63.2.

### 2-Allylcyclobutan-1-one *O*-(4-(trifluoromethyl)benzoyl) oxime<sup>2</sup>

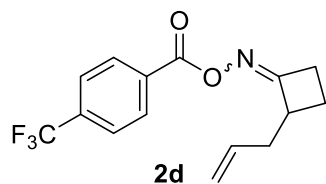

Colorless liquid, 1.1 g, 74% yield.  $^1\text{H}$  NMR (500 MHz,  $\text{CDCl}_3$ )  $\delta$  8.12 (d,  $J = 8.0$  Hz, 2H), 7.71 (d,  $J = 8.0$  Hz, 2H), 5.76 (ddt,  $J = 17.0, 10.0, 7.0$  Hz, 1H), 5.12 – 5.05 (m, 2H), 3.55 (dddd,  $J = 12.0, 10.0, 5.5, 2.5$  Hz, 1H), 3.07 – 2.95 (m, 2H), 2.61 (dddt,  $J = 14.5, 6.5, 5.0, 1.5$  Hz, 1H), 2.48 (dddt,  $J = 14.5, 8.5, 7.0, 1.5$  Hz, 1H), 2.16 (dtd,  $J = 11.5, 9.5, 7.0$  Hz, 1H), 1.84 – 1.78 (m, 1H).  $^{13}\text{C}$  NMR (126 MHz,  $\text{CDCl}_3$ ):  $\delta$  171.5, 162.9, 134.7 (q,  $J = 32.8$  Hz), 134.1, 132.4, 130.0, 125.7 (q,  $J = 3.8$  Hz,  $\text{CF}_3$ ), 121.8 (q,  $J = 272.8$  Hz), 117.7, 45.3, 35.4, 28.9, 19.2.  $^{19}\text{F}$  NMR (471 MHz,  $\text{CDCl}_3$ )  $\delta$  -63.2.

**Methyl 3-(((4-(trifluoromethyl)benzoyl)oxy)imino)cyclobutane-1-carboxylate<sup>8</sup>**

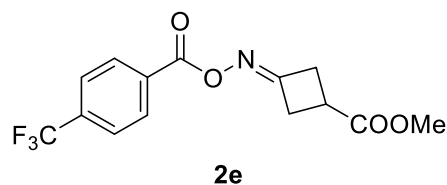

White solid, 1.3 g, 82% yield. M.P.: 80.2-80.7 °C. <sup>1</sup>H NMR (500 MHz, CDCl<sub>3</sub>) δ 8.11 (d, *J* = 7.0 Hz, 2H), 7.69 (d, *J* = 7.0 Hz, 2H), 3.76 – 3.71 (m, 3H), 3.39 (td, *J* = 9.0, 8.0, 4.5 Hz, 4H), 3.28 (q, *J* = 8.0 Hz, 1H). <sup>13</sup>C NMR (126 MHz, CDCl<sub>3</sub>): δ 173.6, 165.2, 162.6, 134.8 (q, *J* = 32.8 Hz), 132.1, 130.1, 125.6 (q, *J* = 3.8 Hz, CF<sub>3</sub>), 123.6 (q, *J* = 272.8 Hz), 52.5, 35.8, 35.7, 30.9. <sup>19</sup>F NMR (471 MHz, CDCl<sub>3</sub>) δ -63.3.

**3-Phenylcyclobutan-1-one *O*-(4-(trifluoromethyl)benzoyl) oxime<sup>9</sup>**

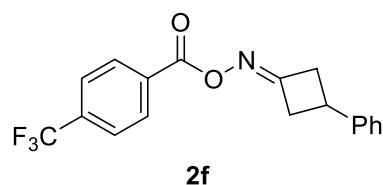

White solid, 0.6 g, 80% yield. M.P.: 112.4-113.8 °C. <sup>1</sup>H NMR (500 MHz, CDCl<sub>3</sub>) δ 8.17 (d, *J* = 8.0 Hz, 2H), 7.73 (d, *J* = 8.0 Hz, 2H), 7.37 (t, *J* = 7.5 Hz, 2H), 7.32 – 7.26 (m, 3H), 3.73 (p, *J* = 8.0 Hz, 1H), 3.68 – 3.56 (m, 2H), 3.32 – 3.21 (m, 2H). <sup>13</sup>C NMR (126 MHz, CDCl<sub>3</sub>): δ 166.9, 162.9, 142.9, 134.9 (q, *J* = 32.7 Hz), 132.4, 130.1, 128.9, 127.1, 126.4, 125.7 (q, *J* = 3.7 Hz, CF<sub>3</sub>), 123.6 (q, *J* = 272.8 Hz), 39.7, 39.6, 32.6. <sup>19</sup>F NMR (471 MHz, CDCl<sub>3</sub>) δ -63.2.

**Tert-butyl 2-(((4-(trifluoromethyl)benzoyl)oxy)imino)-7-azaspiro[3.5]nonane-7-carboxylate<sup>2</sup>**

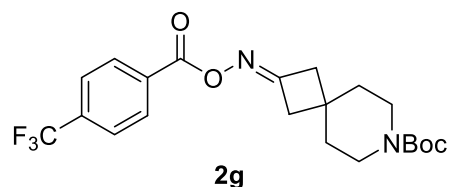

White solid, 1.4 g, 66% yield. M.P.: 137.7-138.5 °C. <sup>1</sup>H NMR (500 MHz, CDCl<sub>3</sub>) δ 8.13 (d, *J* = 8.0 Hz, 2H), 7.70 (d, *J* = 8.0 Hz, 2H), 3.38 (t, *J* = 5.5 Hz, 4H), 2.87 (d, *J* = 4.0 Hz, 4H), 1.66 (q, *J* = 5.0 Hz, 4H), 1.44 (s, 9H). <sup>13</sup>C NMR (126 MHz, CDCl<sub>3</sub>): δ 166.0, 162.8, 154.9, 134.8 (q,

$J = 32.7$  Hz), 132.3, 130.1, 125.6 (q,  $J = 3.7$  Hz,  $\text{CF}_3$ ), 123.6 (q,  $J = 272.7$  Hz), 79.9, 41.97, 41.95, 41.0, 36.4, 33.5, 28.5.  $^{19}\text{F}$  NMR (471 MHz,  $\text{CDCl}_3$ )  $\delta$  -63.2.

**Oxetan-3-one *O*-(4-(trifluoromethyl)benzoyl) oxime<sup>2</sup>**

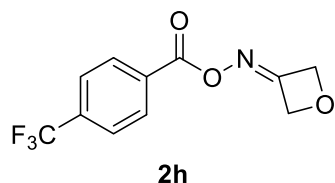

White solid, 1.2 g, 92% yield. M.P.: 109.4-110.1 °C.  $^1\text{H}$  NMR (500 MHz,  $\text{CDCl}_3$ )  $\delta$  8.07 (d,  $J = 8.0$  Hz, 2H), 7.69 (d,  $J = 8.0$  Hz, 2H), 5.45 (dd,  $J = 4.0, 2.0$  Hz, 2H), 5.44 – 5.41 (m, 2H).  $^{13}\text{C}$  NMR (126 MHz,  $\text{CDCl}_3$ ):  $\delta$  163.8, 162.1, 135.1 (q,  $J = 32.8$  Hz), 131.4, 130.1, 125.7 (q,  $J = 3.8$  Hz,  $\text{CF}_3$ ), 123.5 (q,  $J = 272.8$  Hz), 72.3.  $^{19}\text{F}$  NMR (471 MHz,  $\text{CDCl}_3$ )  $\delta$  -63.3.

**Benzyl 3-(((4-(trifluoromethyl)benzoyl)oxy)imino)azetidine-1-carboxylate<sup>2</sup>**

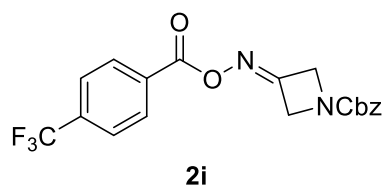

White solid, 1.2 g, 61% yield. M.P.: 153.6-154.0 °C.  $^1\text{H}$  NMR (500 MHz,  $\text{CDCl}_3$ )  $\delta$  8.12 (d,  $J = 8.0$  Hz, 2H), 7.74 (d,  $J = 8.0$  Hz, 2H), 7.41 – 7.32 (m, 5H), 5.16 (s, 2H), 4.93 – 4.89 (m, 4H).  $^{13}\text{C}$  NMR (126 MHz,  $\text{CDCl}_3$ ):  $\delta$  162.1, 158.9, 156.3, 135.9, 135.3 (q,  $J = 32.8$  Hz), 131.4, 130.2, 128.8, 128.6, 128.4, 125.8 (q,  $J = 3.7$  Hz,  $\text{CF}_3$ ), 123.5 (q,  $J = 272.9$  Hz), 67.9, 58.6.  $^{19}\text{F}$  NMR (471 MHz,  $\text{CDCl}_3$ )  $\delta$  -63.3.

**Cyclobutanone *O*-(4-(trifluoromethyl)benzoyl) oxime<sup>2</sup>**

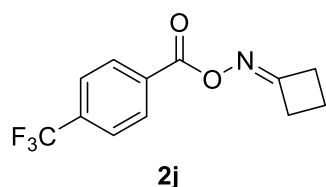

White solid, 1.1 g, 61% yield. M.P.: 91.2-92.0 °C.  $^1\text{H}$  NMR (500 MHz,  $\text{CDCl}_3$ )  $\delta$  8.13 (d,  $J = 8.0$  Hz, 2H), 7.70 (d,  $J = 8.0$  Hz, 2H), 3.13 (t,  $J = 8.0$  Hz, 4H), 2.12 (p,  $J = 8.0$  Hz, 2H).  $^{13}\text{C}$  NMR (126 MHz,  $\text{CDCl}_3$ ):  $\delta$  170.1, 162.9, 134.7 (q,  $J = 32.7$  Hz), 132.5, 130.1, 125.6 (q,  $J =$

3.7 Hz, CF<sub>3</sub>), 123.6 (q, *J* = 272.8 Hz), 31.97, 31.96, 14.4. <sup>19</sup>F NMR (471 MHz, CDCl<sub>3</sub>) δ -63.3.

**2-Phenylcyclobutan-1-one *O*-(4-(trifluoromethyl)benzoyl) oxime<sup>10</sup>**

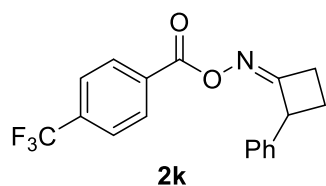

White solid, 0.4 g, 40% yield. M.P.: 117.5-118.4 °C. <sup>1</sup>H NMR (500 MHz, CDCl<sub>3</sub>) δ 8.17 (d, *J* = 8.0 Hz, 2H), 7.73 (d, *J* = 8.0 Hz, 2H), 7.41 (dd, *J* = 8.0, 1.5 Hz, 2H), 7.36 (t, *J* = 7.5 Hz, 2H), 7.29 – 7.24 (m, 1H), 4.69 (ddd, *J* = 10.0, 7.0, 3.0 Hz, 1H), 3.28 – 3.12 (m, 2H), 2.64 (dtd, *J* = 11.0, 10.0, 6.0 Hz, 1H), 2.30 (ddt, *J* = 11.0, 10.0, 7.0 Hz, 1H). <sup>13</sup>C NMR (126 MHz, CDCl<sub>3</sub>): δ 171.7, 162.8, 138.6, 134.8 (q, *J* = 32.8 Hz), 132.5, 130.1, 128.8, 127.3, 127.2, 125.6 (q, *J* = 3.7 Hz, CF<sub>3</sub>), 123.6 (q, *J* = 272.8 Hz), 49.7, 29.6, 23.3. <sup>19</sup>F NMR (471 MHz, CDCl<sub>3</sub>) δ -63.2.

**Cyclopentanone *O*-(4-(trifluoromethyl)benzoyl) oxime**

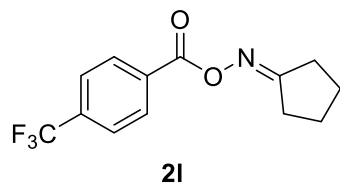

White solid, 1.1 g, 81% yield. M.P.: 100.9-101.7 °C. <sup>1</sup>H NMR (500 MHz, CDCl<sub>3</sub>) δ 8.16 (d, *J* = 8.0 Hz, 2H), 7.71 (d, *J* = 8.0 Hz, 2H), 2.75 – 2.67 (m, 2H), 2.67 – 2.54 (m, 2H), 1.86 (p, *J* = 6.0 Hz, 4H). <sup>13</sup>C NMR (126 MHz, CDCl<sub>3</sub>): δ 177.0, 163.0, 134.7 (q, *J* = 32.8 Hz), 132.7, 130.1, 125.6 (q, *J* = 3.7 Hz, CF<sub>3</sub>), 123.7 (q, *J* = 272.6 Hz), 31.7, 29.6, 25.3, 24.7. <sup>19</sup>F NMR (376 MHz, CDCl<sub>3</sub>) δ -63.2. HRMS-ESI (*m/z*): Calculated for C<sub>13</sub>H<sub>12</sub>F<sub>3</sub>NNaO<sub>2</sub> (*M* + Na)<sup>+</sup>: 294.0718, Found: 294.0726.

**Bicyclo[4.2.0]octa-1(6),2,4-trien-7-one *O*-(4-(trifluoromethyl)benzoyl) oxime<sup>2</sup>**

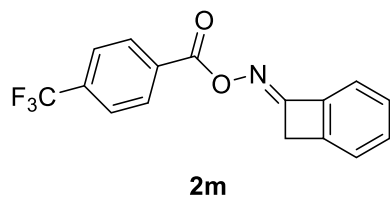

White solid, 0.6 g, 67% yield. M.P.: 100.9-101.7 °C. <sup>1</sup>H NMR (400 MHz, CDCl<sub>3</sub>) δ 8.21 (d, *J*



= 8.0 Hz, 2H), 7.76 (d,  $J = 8.2$  Hz, 2H), 7.52 – 7.45 (m, 2H), 7.42 – 7.34 (m, 2H), 4.12 (s, 2H).  $^{13}\text{C}$  NMR (101 MHz,  $\text{CDCl}_3$ ):  $\delta$  163.0, 161.6, 144.7, 139.2, 135.0 (q,  $J = 32.9$  Hz), 133.7, 132.3, 130.2, 129.2, 125.8 (q,  $J = 3.7$  Hz,  $\text{CF}_3$ ), 123.7 (q,  $J = 273.8$  Hz), 123.6, 121.9, 40.1.  $^{19}\text{F}$  NMR (376 MHz,  $\text{CDCl}_3$ )  $\delta$  -63.2.

### 2-Benzylcyclobutan-1-one *O*-benzoyl oxime<sup>2</sup>

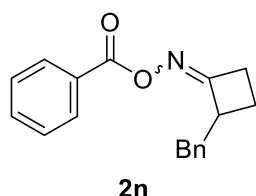

Yellow liquid, 1.4 g, 48% yield.  $^1\text{H}$  NMR (500 MHz,  $\text{CDCl}_3$ )  $\delta$  7.97 (d,  $J = 7.2$  Hz, 2H), 7.58 (t,  $J = 7.5$  Hz, 1H), 7.44 (t,  $J = 8.0$  Hz, 2H), 7.32 – 7.27 (m, 2H), 7.21 (d,  $J = 7.5$  Hz, 3H), 3.78 (tt,  $J = 10.0, 4.0$  Hz, 1H), 3.31 (dd,  $J = 14.0, 5.5$  Hz, 1H), 3.02 (dd,  $J = 14.0, 9.5$  Hz, 1H), 2.99 – 2.92 (m, 2H), 2.13 (dtd,  $J = 11.5, 9.0, 7.0$  Hz, 1H), 1.86 – 1.78 (m, 1H).  $^{13}\text{C}$  NMR (126 MHz,  $\text{CDCl}_3$ ):  $\delta$  170.4, 163.8, 138.1, 133.0, 129.3, 128.7, 128.6, 128.4, 128.3, 126.4, 46.7, 37.0, 28.6, 19.3.

### 2-Benzylcyclobutan-1-one *O*-(4-nitrobenzoyl) oxime

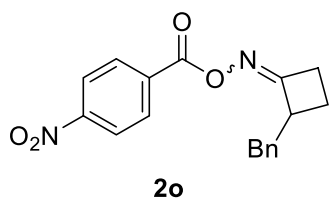

White solid, 3.2 g, 73% yield. M.P.: 103.5-104.1 °C.  $^1\text{H}$  NMR (500 MHz,  $\text{CDCl}_3$ )  $\delta$  8.25 (d,  $J = 9.0$  Hz, 2H), 8.00 (d,  $J = 9.0$  Hz, 2H), 7.32 – 7.26 (m, 2H), 7.23 – 7.14 (m, 3H), 3.85 – 3.72 (m, 1H), 3.23 (dd,  $J = 14.0, 7.0$  Hz, 1H), 3.09 – 2.93 (m, 3H), 2.19 (dtd,  $J = 11.5, 9.0, 7.5$  Hz, 1H), 1.90 – 1.78 (m, 1H).  $^{13}\text{C}$  NMR (126 MHz,  $\text{CDCl}_3$ ):  $\delta$  171.5, 162.3, 150.7, 138.4, 134.4, 130.7, 128.8, 128.7, 126.8, 123.6, 47.3, 37.8, 29.2, 19.9. HRMS-ESI ( $m/z$ ): Calculated for  $\text{C}_{18}\text{H}_{16}\text{N}_2\text{NaO}_4$  ( $M + \text{H}$ )<sup>+</sup>: 347.1008, Found: 347.0997.

### 1-Benzyl-6-chloro-2,3-dihydro-1H-cyclopenta[*b*]quinoxaline

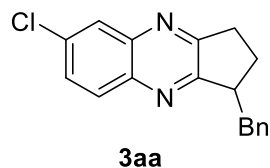

White solid, 54.5 mg, 92% yield. M.P.: 83.4-84.7 °C. <sup>1</sup>H NMR (500 MHz, CDCl<sub>3</sub>) δ 8.03 – 7.94 (m, 2H), 7.62 (dd, *J* = 9.0, 2.5 Hz, 1H), 7.32 – 7.27 (m, 2H), 7.25 – 7.20 (m, 3H), 3.62 – 3.54 (m, 2H), 3.07 – 3.02 (m, 2H), 2.82 – 2.74 (m, 1H), 2.32 (dtd, *J* = 13.0, 8.0, 5.5 Hz, 1H), 1.96 (dq, *J* = 13.0, 8.5 Hz, 1H). <sup>13</sup>C NMR (126 MHz, CDCl<sub>3</sub>): δ 162.4, 161.8, 142.3, 140.3, 139.5, 134.6, 130.2, 129.7, 129.2, 128.6, 127.9, 126.5, 45.4, 39.2, 30.9, 27.7. HRMS-ESI (*m/z*): Calculated for C<sub>18</sub>H<sub>16</sub>ClN<sub>2</sub> (*M* + *H*)<sup>+</sup>: 295.1002, Found: 295.1004.

### 1-Benzyl-6-bromo-2,3-dihydro-1H-cyclopenta[*b*]quinoxaline

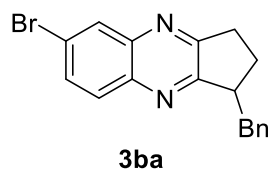

White solid, 56.3 mg, 83% yield. M.P.: 86.8-87.5 °C. <sup>1</sup>H NMR (500 MHz, CDCl<sub>3</sub>) δ 8.18 (s, 1H), 7.94 (d, *J* = 9.0 Hz, 1H), 7.76 (d, *J* = 9.0 Hz, 1H), 7.32 – 7.28 (m, 2H), 7.24 (d, *J* = 7.4 Hz, 3H), 3.57 (ddt, *J* = 12.5, 8.5, 4.5 Hz, 2H), 3.06 (t, *J* = 8.0 Hz, 2H), 2.84 – 2.76 (m, 1H), 2.32 (dt, *J* = 14.0, 6.5 Hz, 1H), 1.96 (dt, *J* = 17.0, 8.5 Hz, 1H). <sup>13</sup>C NMR (126 MHz, CDCl<sub>3</sub>): δ 162.6, 161.9, 142.6, 140.6, 139.5, 132.3, 131.3, 130.4, 129.2, 128.6, 126.5, 122.7, 45.5, 39.2, 31.0, 27.7. HRMS-ESI (*m/z*): Calculated for C<sub>18</sub>H<sub>16</sub>BrN<sub>2</sub> (*M* + *H*)<sup>+</sup>: 341.0476, Found: 341.0484.

### 1-Benzyl-6-fluoro-2,3-dihydro-1H-cyclopenta[*b*]quinoxaline

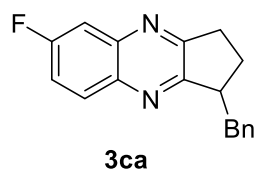

White solid, 44.3 mg, 80% yield. M.P.: 132.0-132.8 °C. <sup>1</sup>H NMR (500 MHz, CDCl<sub>3</sub>) δ 8.09 (dd, *J* = 9.0, 6.0 Hz, 1H), 7.67 (dd, *J* = 9.5, 3.0 Hz, 1H), 7.48 (td, *J* = 8.5, 3.0 Hz, 1H), 7.32 (dd,

$J = 8.0, 7.0$  Hz, 2H), 7.28 – 7.23 (m, 3H), 3.65 – 3.57 (m, 2H), 3.10 – 3.02 (m, 2H), 2.80 (dd,  $J = 14.5, 11.0$  Hz, 1H), 2.34 (dtd,  $J = 13.5, 7.5, 5.5$  Hz, 1H), 2.02 – 1.95 (m, 1H).  $^{13}\text{C}$  NMR (126 MHz,  $\text{CDCl}_3$ ):  $\delta$  163.3, 161.8, 161.6 (d,  $J = 21.8$  Hz), 161.3, 142.7 (d,  $J = 12.7$  Hz), 139.6, 138.9, 130.8 (d,  $J = 9.9$  Hz), 129.2, 128.6, 126.5, 118.7 (d,  $J = 25.4$  Hz), 112.7 (d,  $J = 21.8$  Hz), 45.3, 39.3, 31.0, 27.8.  $^{19}\text{F}$  NMR (471 MHz,  $\text{CDCl}_3$ )  $\delta$  -110.3. HRMS-ESI ( $m/z$ ): Calculated for  $\text{C}_{18}\text{H}_{16}\text{FN}_2$  ( $M + \text{H}$ ) $^+$ : 279.1298, Found: 279.1303.

### 1-Benzyl-6-methoxy-2,3-dihydro-1H-cyclopenta[b]quinoxaline

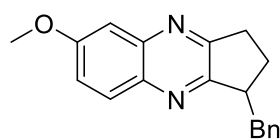

**3da**

White solid, 50.0 mg, 86% yield. M.P.: 96.2-97.4 °C.  $^1\text{H}$  NMR (500 MHz,  $\text{CDCl}_3$ )  $\delta$  7.96 (dd,  $J = 10.0, 1.0$  Hz, 1H), 7.35 (ddt,  $J = 5.5, 2.5, 1.0$  Hz, 2H), 7.30 (t,  $J = 7.5$  Hz, 2H), 7.27 – 7.20 (m, 3H), 3.95 (s, 3H), 3.62 – 3.54 (m, 2H), 3.03 (t,  $J = 7.5$  Hz, 2H), 2.77 (dd,  $J = 14.5, 11.0$  Hz, 1H), 2.30 (dq,  $J = 13.5, 7.0$  Hz, 1H), 1.96 (dq,  $J = 16.5, 8.0$  Hz, 1H).  $^{13}\text{C}$  NMR (126 MHz,  $\text{CDCl}_3$ ):  $\delta$  160.7, 160.2, 159.5, 143.5, 139.9, 137.7, 129.9, 129.3, 128.6, 126.4, 121.4, 107.1, 55.8, 45.2, 39.6, 31.0, 27.8. HRMS-ESI ( $m/z$ ): Calculated for  $\text{C}_{19}\text{H}_{19}\text{N}_2\text{O}$  ( $M + \text{H}$ ) $^+$ : 291.1497, Found: 291.1496.

### 1-Benzyl-6-methyl-2,3-dihydro-1H-cyclopenta[b]quinoxaline

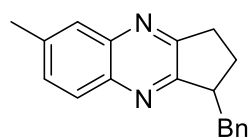

**3ea**

White solid, 41.5 mg, 76% yield. M.P.: 84.5-84.7 °C.  $^1\text{H}$  NMR (500 MHz,  $\text{CDCl}_3$ )  $\delta$  7.97 (d,  $J = 8.5$  Hz, 1H), 7.79 (s, 1H), 7.52 (dd,  $J = 8.5, 2.0$  Hz, 1H), 7.30 (dd,  $J = 8.0, 7.0$  Hz, 2H), 7.27 – 7.20 (m, 3H), 3.58 (ddt,  $J = 13.0, 8.0, 4.5$  Hz, 2H), 3.07 – 3.00 (m, 2H), 2.78 (dd,  $J = 14.5, 11.0$  Hz, 1H), 2.58 (s, 3H), 2.30 (dtd,  $J = 13.5, 8.0, 5.5$  Hz, 1H), 1.98 – 1.93 (m, 1H).  $^{13}\text{C}$  NMR (126 MHz,  $\text{CDCl}_3$ ):  $\delta$  161.2, 160.6, 142.0, 140.2, 139.8, 139.4, 131.0, 129.2, 128.6, 128.5, 128.0, 126.4, 45.4, 39.4, 30.9, 27.8, 21.8. HRMS-ESI ( $m/z$ ): Calculated for  $\text{C}_{19}\text{H}_{19}\text{N}_2$  ( $M + \text{H}$ ) $^+$ :

275.1548, Found: 275.1551.

**1-Benzyl-6-(trifluoromethoxy)-2,3-dihydro-1H-cyclopenta[*b*]quinoxaline**

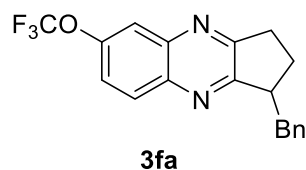

White solid, 45.3 mg, 66% yield. M.P.: 88.1-88.6 °C. <sup>1</sup>H NMR (500 MHz, CDCl<sub>3</sub>) δ 8.12 (d, *J* = 9.0 Hz, 1H), 7.87 (dd, *J* = 3.0, 1.5 Hz, 1H), 7.56 (dd, *J* = 9.0, 2.5 Hz, 1H), 7.33 – 7.28 (m, 2H), 7.26 – 7.21 (m, 3H), 3.66 – 3.55 (m, 2H), 3.11 – 3.05 (m, 2H), 2.84 – 2.77 (m, 1H), 2.35 (dtd, *J* = 13.5, 7.5, 5.5 Hz, 1H), 1.99 (dq, *J* = 13.0, 8.5 Hz, 1H). <sup>13</sup>C NMR (126 MHz, CDCl<sub>3</sub>): δ 162.9, 162.2, 149.0 (d, *J* = 2.0 Hz), 142.2, 140.2, 139.5, 130.7, 129.2, 128.7, 126.6, 122.6, 120.7 (q, *J* = 258.5 Hz), 119.2, 45.5, 39.3, 31.0, 27.8. <sup>19</sup>F NMR (471 MHz, CDCl<sub>3</sub>) δ -57.8. HRMS-ESI (*m/z*): Calculated for C<sub>19</sub>H<sub>16</sub>F<sub>3</sub>N<sub>2</sub>O (M + H)<sup>+</sup>: 345.1215, Found: 345.1219.

**1-Benzyl-6-(trifluoromethyl)-2,3-dihydro-1H-cyclopenta[*b*]quinoxaline**

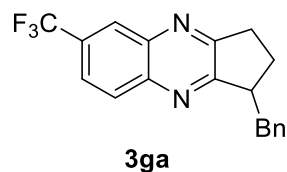

Yellow liquid, 24.0 mg, 37% yield. <sup>1</sup>H NMR (500 MHz, CDCl<sub>3</sub>) δ 8.33 (s, 1H), 8.20 (d, *J* = 8.5 Hz, 1H), 7.88 (dd, *J* = 8.5, 2.0 Hz, 1H), 7.33 – 7.29 (m, 2H), 7.26 – 7.22 (m, 3H), 3.68 – 3.58 (m, 2H), 3.13 – 3.07 (m, 2H), 2.87 – 2.80 (m, 1H), 2.37 (dtd, *J* = 13.5, 7.5, 5.5 Hz, 1H), 2.01 (dq, *J* = 13.0, 8.5 Hz, 1H). <sup>13</sup>C NMR (126 MHz, CDCl<sub>3</sub>): δ 164.6, 162.6, 143.1, 141.1, 139.4, 130.3, 129.3, 128.7, 126.9 (q, *J* = 4.3 Hz), 126.6, 125.0, 124.7 (q, *J* = 3.1 Hz), 122.9, 45.6, 39.2, 31.0, 27.8. <sup>19</sup>F NMR (471 MHz, CDCl<sub>3</sub>) δ -62.4. HRMS-ESI (*m/z*): Calculated for C<sub>19</sub>H<sub>16</sub>F<sub>3</sub>N<sub>2</sub> (M + H)<sup>+</sup>: 329.1266, Found: 329.1262.

### 1-(1-Benzyl-2,3-dihydro-1*H*-cyclopenta[*b*]quinoxalin-6-yl)ethan-1-one

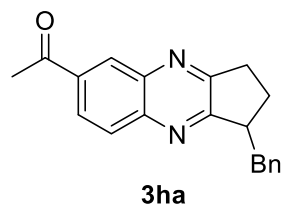

Yellow solid, 15.2 mg, 25% yield. M.P.: 110.9-111.8 °C. <sup>1</sup>H NMR (500 MHz, CDCl<sub>3</sub>) δ 8.59 (d, *J* = 2.0 Hz, 1H), 8.27 (dd, *J* = 8.5, 2.0 Hz, 1H), 8.13 (d, *J* = 8.5 Hz, 1H), 7.33 – 7.29 (m, 2H), 7.25 (d, *J* = 11.5 Hz, 3H), 3.66 – 3.59 (m, 2H), 3.12 – 3.07 (m, 2H), 2.85 – 2.79 (m, 1H), 2.75 (s, 3H), 2.36 (td, *J* = 13.5, 7.5 Hz, 1H), 2.05 – 1.97 (m, 1H). <sup>13</sup>C NMR (126 MHz, CDCl<sub>3</sub>): δ 197.5, 164.6, 162.2, 144.3, 141.4, 139.5, 137.0, 130.7, 129.6, 129.2, 128.7, 127.2, 126.6, 45.7, 39.2, 31.0, 27.7, 26.9. HRMS-ESI (*m/z*): Calculated for C<sub>20</sub>H<sub>19</sub>N<sub>2</sub>O (*M* + *H*)<sup>+</sup>: 303.1497, Found: 303.1494.

### 6-Benzyl-7,8-dihydro-6*H*-cyclopenta[*b*][1,3]dioxolo[4,5-*g*]quinoxaline

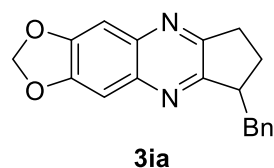

White solid, 43.3 mg, 71% yield. M.P.: 142.0-143.5 °C. <sup>1</sup>H NMR (400 MHz, CDCl<sub>3</sub>) δ 7.34 (s, 1H), 7.31 – 7.26 (m, 3H), 7.25 – 7.18 (m, 3H), 6.13 (s, 2H), 3.54 (tq, *J* = 9.2, 4.4 Hz, 2H), 3.04 – 2.95 (m, 2H), 2.73 (dd, *J* = 14.6, 11.0 Hz, 1H), 2.27 (dtd, *J* = 13.8, 7.6, 6.0 Hz, 1H), 1.92 (dtd, *J* = 13.2, 8.4, 7.2 Hz, 1H). <sup>13</sup>C NMR (101 MHz, CDCl<sub>3</sub>): δ 159.3, 157.8, 150.0, 149.9, 140.1, 140.0, 139.9, 129.2, 128.5, 126.3, 105.0, 104.8, 102.3, 45.2, 39.6, 30.6, 27.8. HRMS-ESI (*m/z*): Calculated for C<sub>19</sub>H<sub>17</sub>N<sub>2</sub>O<sub>2</sub> (*M* + *H*)<sup>+</sup>: 305.1290, Found: 305.1288.

### 1-Benzyl-5,7-dimethyl-2,3-dihydro-1*H*-cyclopenta[*b*]quinoxaline

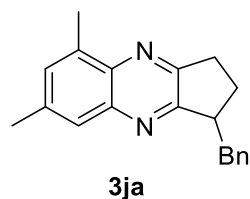

Yellow liquid, 46.1 mg, 80% yield.  $^1\text{H}$  NMR (500 MHz,  $\text{CDCl}_3$ )  $\delta$  7.71 (s, 1H), 7.37 (s, 1H), 7.32 – 7.21 (m, 5H), 3.63 – 3.54 (m, 2H), 3.14 – 3.00 (m, 2H), 2.80 – 2.73 (m, 4H), 2.53 (s, 3H), 2.30 (dtd,  $J = 13.2, 8.0, 5.2$  Hz, 1H), 1.95 (dq,  $J = 12.8, 8.4$  Hz, 1H).  $^{13}\text{C}$  NMR (126 MHz,  $\text{CDCl}_3$ ):  $\delta$  161.4, 158.6, 142.0, 140.0, 139.6, 138.7, 136.4, 131.5, 129.3, 128.6, 126.4, 126.1, 45.4, 39.5, 31.0, 27.8, 21.8, 17.6. HRMS-ESI ( $m/z$ ): Calculated for  $\text{C}_{20}\text{H}_{21}\text{N}_2$  ( $\text{M} + \text{H}$ ) $^+$ : 289.1705, Found: 289.1704.

### 10-benzyl-9,10-dihydro-8H-benzof[cyclopenta[b]quinoxaline

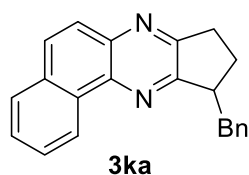

Orange solid, 34.2 mg, 55% yield. M.P.: 120.2-121.3 °C.  $^1\text{H}$  NMR (500 MHz,  $\text{CDCl}_3$ )  $\delta$  9.32 (dd,  $J = 8.5, 4.5$  Hz, 1H), 7.96 (dtd,  $J = 21.5, 9.0, 4.5$  Hz, 3H), 7.79 – 7.70 (m, 2H), 7.36 – 7.30 (m, 4H), 7.26 (tt,  $J = 6.5, 3.0$  Hz, 1H), 3.71 (dtd,  $J = 18.0, 15.5, 4.5$  Hz, 2H), 3.13 (dt,  $J = 8.5, 5.5$  Hz, 2H), 2.93 (ddd,  $J = 14.0, 9.0, 5.0$  Hz, 1H), 2.41 (tq,  $J = 12.0, 5.5, 4.0$  Hz, 1H), 2.02 (dq,  $J = 13.0, 8.5, 3.5$  Hz, 1H).  $^{13}\text{C}$  NMR (126 MHz,  $\text{CDCl}_3$ ):  $\delta$  160.3, 159.9, 141.1, 140.1, 140.0, 133.1, 131.4, 130.4, 129.4, 128.5, 128.3, 127.9, 127.3, 126.9, 126.4, 124.4, 45.5, 39.7, 31.0, 28.2. HRMS-ESI ( $m/z$ ): Calculated for  $\text{C}_{22}\text{H}_{19}\text{N}_2$  ( $\text{M} + \text{H}$ ) $^+$ : 311.1548, Found: 311.1554.

### 1-Benzyl-8-methyl-2,3-dihydro-1H-cyclopenta[b]quinoxaline

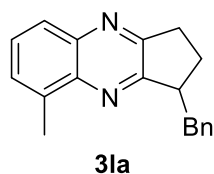

White solid, 34.0 mg, 62% yield. M.P.: 78.3-79.2 °C.  $^1\text{H}$  NMR (500 MHz,  $\text{CDCl}_3$ )  $\delta$  7.86 (d,  $J = 8.0$  Hz, 1H), 7.56 (t,  $J = 7.5$  Hz, 1H), 7.52 (d,  $J = 7.0$  Hz, 1H), 7.33 – 7.27 (m, 4H), 7.23 (ddd,  $J = 7.0, 5.0, 3.0$  Hz, 1H), 3.60 (td,  $J = 13.5, 5.0$  Hz, 2H), 3.10 – 3.04 (m, 2H), 2.89 – 2.84 (m, 1H), 2.82 (s, 3H), 2.36 (dtd,  $J = 13.0, 7.5, 5.5$  Hz, 1H), 1.99 – 1.93 (m, 1H).  $^{13}\text{C}$  NMR (126 MHz,  $\text{CDCl}_3$ ):  $\delta$  160.8, 160.0, 141.9, 141.0, 140.0, 137.4, 129.3, 129.0, 128.6, 128.5, 126.7, 126.3, 45.4, 39.4, 30.9, 28.1, 17.4. HRMS-ESI ( $m/z$ ): Calculated for  $\text{C}_{19}\text{H}_{19}\text{N}_2$  ( $\text{M} + \text{H}$ ) $^+$ :

275.1548, Found: 275.1544.

**1-Benzyl-8-chloro-2,3-dihydro-1H-cyclopenta[b]quinoxaline**

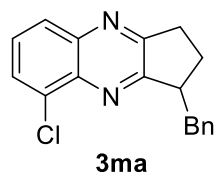

White solid, 27.0 mg, 46% yield. M.P.: 66.8-67.7 °C. <sup>1</sup>H NMR (500 MHz, CDCl<sub>3</sub>) δ 7.94 (dd, *J* = 8.5, 1.5 Hz, 1H), 7.79 (dd, *J* = 7.5, 1.5 Hz, 1H), 7.59 (t, *J* = 8.0 Hz, 1H), 7.32 – 7.27 (m, 4H), 7.22 (ddd, *J* = 8.5, 5.5, 2.0 Hz, 1H), 3.74 – 3.61 (m, 2H), 3.08 (dd, *J* = 8.5, 6.5 Hz, 2H), 2.86 (dd, *J* = 13.5, 9.5 Hz, 1H), 2.36 (ddt, *J* = 13.0, 8.0, 6.5 Hz, 1H), 2.04 – 1.95 (m, 1H). <sup>13</sup>C NMR (126 MHz, CDCl<sub>3</sub>): δ 163.0, 161.7, 143.0, 139.5, 138.8, 133.1, 129.4, 129.0, 128.6, 128.5, 128.0, 126.4, 45.5, 39.2, 30.9, 27.7. HRMS-ESI (*m/z*): Calculated for C<sub>18</sub>H<sub>16</sub>ClN<sub>2</sub> (M + H)<sup>+</sup>: 295.1002, Found: 295.1002.

**1-Benzyl-8-methoxy-2,3-dihydro-1H-cyclopenta[b]quinoxaline**

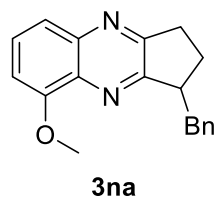

White solid, 36.1 mg, 62% yield. M.P.: 121.9-122.4 °C. <sup>1</sup>H NMR (500 MHz, CDCl<sub>3</sub>) δ 7.64 – 7.61 (m, 2H), 7.33 – 7.28 (m, 2H), 7.26 – 7.22 (m, 3H), 7.08 (dd, *J* = 5.5, 3.5 Hz, 1H), 4.12 (s, 3H), 3.73 – 3.66 (m, 2H), 3.09 – 3.03 (m, 2H), 2.79 – 2.72 (m, 1H), 2.33 – 2.25 (m, 1H), 2.02 – 1.94 (m, 1H). <sup>13</sup>C NMR (126 MHz, CDCl<sub>3</sub>): δ 161.2, 161.1, 155.3, 142.9, 139.8, 133.8, 129.2, 129.0, 128.6, 126.4, 120.8, 107.7, 55.5, 45.4, 39.7, 30.8, 27.4. HRMS-ESI (*m/z*): Calculated for C<sub>19</sub>H<sub>19</sub>N<sub>2</sub>O (M + H)<sup>+</sup>: 291.1497, Found: 291.1491.

**1-Benzyl-7-methoxy-2,3-dihydro-1H-cyclopenta[b]quinoxaline**

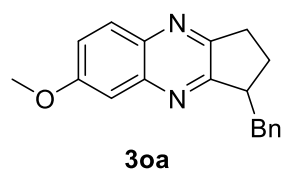

White solid, 21.5 mg, 37% yield. M.P.: 61.1–62.0 °C. <sup>1</sup>H NMR (500 MHz, CDCl<sub>3</sub>) δ 7.90 (d, *J* = 9.0 Hz, 1H), 7.42 (d, *J* = 3.0 Hz, 1H), 7.34 (dd, *J* = 9.0, 3.0 Hz, 1H), 7.33 – 7.29 (m, 2H), 7.27 – 7.23 (m, 3H), 3.97 (s, 3H), 3.64 – 3.54 (m, 2H), 3.08 – 3.01 (m, 2H), 2.81 – 2.74 (m, 1H), 2.30 (dtd, *J* = 13.0, 8.0, 5.5 Hz, 1H), 1.96 (dq, *J* = 13.0, 8.0 Hz, 1H). <sup>13</sup>C NMR (126 MHz, CDCl<sub>3</sub>): δ 162.1, 160.1, 158.1, 143.4, 139.9, 137.9, 129.7, 129.3, 128.6, 126.4, 121.6, 107.2, 55.9, 45.6, 39.5, 30.7, 27.8. HRMS-ESI (*m/z*): Calculated for C<sub>19</sub>H<sub>19</sub>N<sub>2</sub>O (*M* + *H*)<sup>+</sup>: 291.1497, Found: 291.1506.

### 1-Benzyl-5-methoxy-2,3-dihydro-1*H*-cyclopenta[*b*]quinoxaline

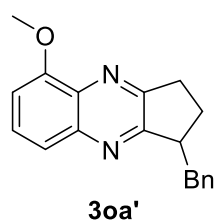

White solid, 19.0 mg, 33% yield. M.P.: 105.7–106.6 °C. <sup>1</sup>H NMR (500 MHz, CDCl<sub>3</sub>) δ 7.68 (dd, *J* = 8.5, 1.0 Hz, 1H), 7.61 (t, *J* = 8.0 Hz, 1H), 7.31 – 7.27 (m, 2H), 7.26 – 7.19 (m, 3H), 7.06 (dd, *J* = 7.5, 1.0 Hz, 1H), 4.09 (s, 3H), 3.63 – 3.56 (m, 2H), 3.17 – 3.04 (m, 2H), 2.83 – 2.74 (m, 1H), 2.30 (tt, *J* = 8.0, 5.0 Hz, 1H), 2.00 – 1.91 (m, 1H). <sup>13</sup>C NMR (126 MHz, CDCl<sub>3</sub>): δ 162.5, 159.5, 155.2, 142.8, 139.7, 133.9, 129.2, 128.8, 128.6, 126.4, 121.0, 107.6, 56.3, 45.4, 39.4, 31.1, 27.7. HRMS-ESI (*m/z*): Calculated for C<sub>19</sub>H<sub>19</sub>N<sub>2</sub>O (*M* + *H*)<sup>+</sup>: 291.1497, Found: 291.1498.

### 1-Benzyl-7-chloro-2,3-dihydro-1*H*-cyclopenta[*b*]quinoxaline

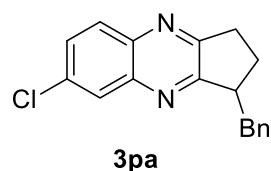

Yellow liquid, 3.0 mg, 5% yield. <sup>1</sup>H NMR (400 MHz, CDCl<sub>3</sub>) δ 8.09 (d, *J* = 2.4 Hz, 1H), 7.95 (d, *J* = 8.8 Hz, 1H), 7.64 (dd, *J* = 8.8, 2.4 Hz, 1H), 7.33 – 7.28 (m, 2H), 7.26 – 7.21 (m, 3H), 3.65 – 3.56 (m, 2H), 3.09 – 3.03 (m, 2H), 2.84 – 2.77 (m, 1H), 2.34 (dtd, *J* = 13.6, 7.6, 6.0 Hz, 1H), 1.98 (dq, *J* = 13.2, 8.4 Hz, 1H). <sup>13</sup>C NMR (151 MHz, CDCl<sub>3</sub>): δ 163.3, 161.2, 142.3, 140.5,



139.6, 134.6, 130.1, 129.9, 129.3, 128.6, 128.2, 126.5, 45.5, 39.3, 31.0, 27.8. HRMS-ESI (m/z):  
Calculated for C<sub>18</sub>H<sub>16</sub>ClN<sub>2</sub> (M + H)<sup>+</sup>: 295.1002, Found: 295.0997.

#### 1-Benzyl-5-chloro-2,3-dihydro-1H-cyclopenta[b]quinoxaline

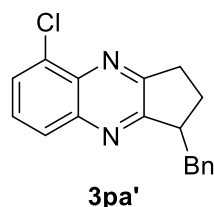

White solid, 30.2 mg, 51% yield. M.P.: 96.5-97.3 °C. <sup>1</sup>H NMR (400 MHz, CDCl<sub>3</sub>) δ 8.02 (dd, *J* = 8.4, 1.2 Hz, 1H), 7.79 (dd, *J* = 7.8, 1.2 Hz, 1H), 7.61 (t, *J* = 8.0 Hz, 1H), 7.33 – 7.21 (m, 5H), 3.68 – 3.55 (m, 2H), 3.25 – 3.08 (m, 2H), 2.86 – 2.76 (m, 1H), 2.35 (dtd, *J* = 13.2, 8.0, 5.2 Hz, 1H), 1.99 (dq, *J* = 13.2, 8.4 Hz, 1H). <sup>13</sup>C NMR (101 MHz, CDCl<sub>3</sub>): δ 163.1, 161.8, 143.0, 139.5, 138.9, 132.7, 129.3, 129.2, 128.7, 128.6, 128.3, 126.5, 45.4, 39.3, 31.3, 27.8. HRMS-ESI (m/z): Calculated for C<sub>18</sub>H<sub>16</sub>ClN<sub>2</sub> (M + H)<sup>+</sup>: 295.1002, Found: 295.0994.

#### 4-(Benzo[d]thiazol-2-yl)-5-phenylpentanenitrile

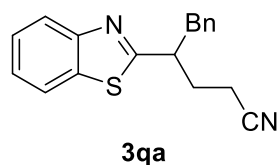

Colorless liquid, 31.5 mg, 53% yield. <sup>1</sup>H NMR (500 MHz, CDCl<sub>3</sub>) δ 8.01 (d, *J* = 8.0 Hz, 1H), 7.85 (d, *J* = 8.5 Hz, 1H), 7.49 (ddd, *J* = 8.5, 7.0, 1.0 Hz, 1H), 7.39 (ddd, *J* = 8.0, 7.0, 1.0 Hz, 1H), 7.30 – 7.26 (m, 2H), 7.24 – 7.20 (m, 1H), 7.18 – 7.14 (m, 2H), 3.62 – 3.54 (m, 1H), 3.27 (dd, *J* = 13.5, 7.0 Hz, 1H), 3.05 (dd, *J* = 14.0, 8.0 Hz, 1H), 2.43 – 2.27 (m, 3H), 2.20 – 2.13 (m, 1H). <sup>13</sup>C NMR (126 MHz, CDCl<sub>3</sub>): δ 172.5, 153.2, 138.1, 134.7, 129.1, 128.8, 126.9, 126.3, 125.3, 123.0, 121.8, 119.2, 45.5, 42.3, 30.2, 15.4. HRMS-ESI (m/z): Calculated for C<sub>18</sub>H<sub>17</sub>N<sub>2</sub>S (M + H)<sup>+</sup>: 293.1112, Found: 293.1111.

### 6-Chloro-1-methyl-2,3-dihydro-1*H*-cyclopenta[*b*]quinoxaline

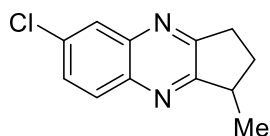

**3ab**

White solid, 25.3 mg, 58% yield. M.P.: 78.6-79.3 °C. <sup>1</sup>H NMR (500 MHz, CDCl<sub>3</sub>) δ 7.99 (d, *J* = 2.5 Hz, 1H), 7.97 (d, *J* = 9.0 Hz, 1H), 7.61 (dd, *J* = 9.0, 2.5 Hz, 1H), 3.35 (ddt, *J* = 15.5, 8.5, 7.0 Hz, 1H), 3.22 – 3.08 (m, 2H), 2.55 (dtd, *J* = 12.5, 8.0, 4.0 Hz, 1H), 1.85 (dq, *J* = 13.0, 9.0 Hz, 1H), 1.48 (d, *J* = 7.0 Hz, 3H). <sup>13</sup>C NMR (126 MHz, CDCl<sub>3</sub>): δ 164.1, 161.7, 142.1, 140.5, 134.5, 130.2, 129.7, 127.9, 38.6, 31.2, 30.8, 18.2. HRMS-ESI (*m/z*): Calculated for C<sub>12</sub>H<sub>12</sub>ClN<sub>2</sub> (*M* + *H*)<sup>+</sup>: 219.0689, Found: 219.0691.

### 6-Chloro-1-ethyl-2,3-dihydro-1*H*-cyclopenta[*b*]quinoxaline

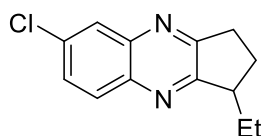

**3ac**

White solid, 31.5 mg, 68% yield. M.P.: 76.3-77.5 °C. <sup>1</sup>H NMR (500 MHz, CDCl<sub>3</sub>) δ 7.97 (d, *J* = 2.5 Hz, 1H), 7.95 (d, *J* = 9.0 Hz, 1H), 7.59 (dd, *J* = 9.0, 2.5 Hz, 1H), 3.22 – 3.06 (m, 3H), 2.53 – 2.46 (m, 1H), 2.15 (dq, *J* = 15.0, 7.5, 5.0 Hz, 1H), 1.91 (dq, *J* = 13.0, 8.5 Hz, 1H), 1.67 – 1.58 (m, 1H), 1.09 (t, *J* = 7.5 Hz, 3H). <sup>13</sup>C NMR (126 MHz, CDCl<sub>3</sub>): δ 163.4, 162.0, 142.2, 140.4, 134.4, 130.2, 129.6, 127.9, 45.3, 31.2, 27.7, 26.5, 11.8. HRMS-ESI (*m/z*): Calculated for C<sub>13</sub>H<sub>14</sub>ClN<sub>2</sub> (*M* + *H*)<sup>+</sup>: 233.0846, Found: 233.0842.

### 1-Allyl-6-chloro-2,3-dihydro-1*H*-cyclopenta[*b*]quinoxaline

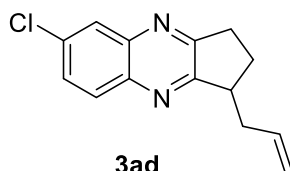

**3ad**

White solid, 41.3 mg, 84% yield. M.P.: 53.4-54.4 °C. <sup>1</sup>H NMR (500 MHz, CDCl<sub>3</sub>) δ 7.99 (d, *J* = 2.5 Hz, 1H), 7.97 (d, *J* = 9.0 Hz, 1H), 7.61 (dd, *J* = 9.0, 2.5 Hz, 1H), 5.95 – 5.86 (m, 1H),

5.15 (dq,  $J = 17.0, 1.5$  Hz, 1H), 5.09 (ddt,  $J = 10.0, 2.0, 1.0$  Hz, 1H), 3.42 – 3.34 (m, 1H), 3.23 – 3.07 (m, 2H), 2.89 (dddt,  $J = 14.0, 6.0, 4.5, 1.5$  Hz, 1H), 2.48 (dtd,  $J = 13.5, 8.5, 5.0$  Hz, 1H), 2.37 (dddt,  $J = 14.0, 9.0, 7.5, 1.0$  Hz, 1H), 2.02 – 1.94 (m, 1H).  $^{13}\text{C}$  NMR (126 MHz,  $\text{CDCl}_3$ ):  $\delta$  162.7, 161.9, 142.3, 140.5, 135.7, 134.6, 130.2, 129.7, 127.9, 117.2, 43.3, 37.7, 31.1, 27.5. HRMS-ESI ( $m/z$ ): Calculated for  $\text{C}_{14}\text{H}_{14}\text{ClN}_2$  ( $M + H$ ) $^+$ : 245.0846, Found: 245.0843.

**Methyl 6-chloro-2,3-dihydro-1H-cyclopenta[b]quinoxaline-2-carboxylate**

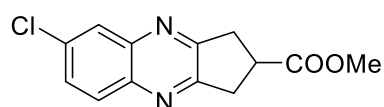

**3ae**

White solid, 21.3 mg, 40% yield. M.P.: 108.7-108.9 °C.  $^1\text{H}$  NMR (500 MHz,  $\text{CDCl}_3$ )  $\delta$  8.00 (d,  $J = 2.5$  Hz, 1H), 7.94 (d,  $J = 9.0$  Hz, 1H), 7.63 (dd,  $J = 9.0, 2.5$  Hz, 1H), 3.78 (s, 3H), 3.56 – 3.52 (m, 1H), 3.51 – 3.45 (m, 4H).  $^{13}\text{C}$  NMR (126 MHz,  $\text{CDCl}_3$ ):  $\delta$  174.5, 159.3, 158.5, 142.3, 140.5, 135.0, 130.2, 130.1, 128.0, 52.6, 39.5, 35.8, 35.7. HRMS-ESI ( $m/z$ ): Calculated for  $\text{C}_{13}\text{H}_{12}\text{ClN}_2\text{O}_2$  ( $M + H$ ) $^+$ : 263.0587, Found: 263.0591.

**6-Chloro-2-phenyl-2,3-dihydro-1H-cyclopenta[b]quinoxaline**

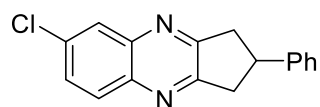

**3af**

White solid, 24.8 mg, 44% yield. M.P.: 146.5-147.6 °C.  $^1\text{H}$  NMR (500 MHz,  $\text{CDCl}_3$ )  $\delta$  8.03 (d,  $J = 2.5$  Hz, 1H), 7.97 (d,  $J = 9.0$  Hz, 1H), 7.65 (dd,  $J = 9.0, 2.5$  Hz, 1H), 7.39 – 7.33 (m, 4H), 7.31 – 7.28 (m, 1H), 3.89 (p,  $J = 8.5$  Hz, 1H), 3.64 (dd,  $J = 8.0, 3.0$  Hz, 1H), 3.61 (dd,  $J = 8.0, 3.1$  Hz, 1H), 3.36 (ddd,  $J = 17.5, 9.5, 5.0$  Hz, 2H).  $^{13}\text{C}$  NMR (126 MHz,  $\text{CDCl}_3$ ):  $\delta$  160.9, 160.1, 143.4, 142.4, 140.6, 134.8, 130.2, 130.0, 129.0, 128.1, 127.2, 127.0, 41.4, 40.6, 40.5. HRMS-ESI ( $m/z$ ): Calculated for  $\text{C}_{17}\text{H}_{14}\text{ClN}_2$  ( $M + H$ ) $^+$ : 281.0846, Found: 281.0841.

**Tert-butyl 6-chloro-1,3-dihydrospiro[cyclopenta[*b*]quinoxaline-2,4'-piperidine]-1'-carboxylate**

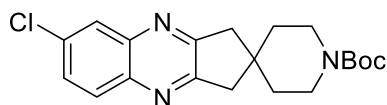

**3ag**

White solid, 55.2 mg, 74% yield. M.P.: 173.9-174.3 °C. <sup>1</sup>H NMR (500 MHz, CDCl<sub>3</sub>) δ 7.98 (d, *J* = 2.5 Hz, 1H), 7.92 (d, *J* = 9.0 Hz, 1H), 7.62 (dd, *J* = 9.0, 2.5 Hz, 1H), 3.53 – 3.48 (m, 4H), 3.09 (d, *J* = 3.5 Hz, 4H), 1.66 (t, *J* = 5.5 Hz, 4H), 1.46 (s, 9H). <sup>13</sup>C NMR (126 MHz, CDCl<sub>3</sub>): δ 160.3, 159.5, 154.9, 142.4, 140.5, 134.8, 130.0, 129.9, 128.0, 79.9, 44.3, 44.2, 39.2, 36.8, 28.6. HRMS-ESI (*m/z*): Calculated for C<sub>20</sub>H<sub>25</sub>ClN<sub>3</sub>O<sub>2</sub> (*M* + *H*)<sup>+</sup>: 374.1635, Found: 374.1640.

**6-Chloro-1,3-dihydrofuro[3,4-*b*]quinoxaline**

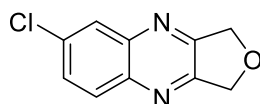

**3ah**

White solid, 33.0 mg, 80% yield. M.P.: 176.7-177.3 °C. <sup>1</sup>H NMR (500 MHz, CDCl<sub>3</sub>) δ 8.06 (d, *J* = 2.5 Hz, 1H), 8.01 (d, *J* = 9.0 Hz, 1H), 7.70 (dd, *J* = 9.0, 2.5 Hz, 1H), 5.23 (d, *J* = 3.5 Hz, 4H). <sup>13</sup>C NMR (126 MHz, CDCl<sub>3</sub>): δ 156.8, 156.1, 142.4, 140.5, 135.7, 130.9, 130.4, 128.3, 71.2, 71.1. HRMS-ESI (*m/z*): Calculated for C<sub>10</sub>H<sub>8</sub>ClN<sub>2</sub>O (*M* + *H*)<sup>+</sup>: 207.0325, Found: 207.0328.

**Benzyl 6-chloro-1,3-dihydro-2*H*-pyrrolo[3,4-*b*]quinoxaline-2-carboxylate**

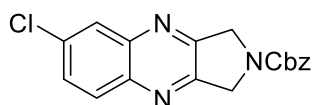

**3ai**

White solid, 31.2 mg, 46% yield. M.P.: 172.5-172.9 °C. <sup>1</sup>H NMR (500 MHz, CDCl<sub>3</sub>) δ 8.06 (dd, *J* = 8.5, 2.5 Hz, 1H), 8.00 (t, *J* = 9.0 Hz, 1H), 7.70 (dt, *J* = 9.0, 2.0 Hz, 1H), 7.45 – 7.42 (m, 2H), 7.41 – 7.37 (m, 2H), 7.36 – 7.33 (m, 1H), 5.28 (s, 2H), 4.94 (dd, *J* = 6.0, 4.0 Hz, 4H). <sup>13</sup>C

NMR (126 MHz, CDCl<sub>3</sub>):  $\delta$  155.0, 154.4, 154.1, 153.6, 153.3, 142.6, 140.8, 136.4, 135.92, 135.89, 131.1, 131.0, 130.45, 130.40, 128.7, 128.4, 128.3, 128.28, 182.24, 67.7, 51.24, 51.19, 51.03, 50.98. (The mixture of two possible isomers attribute to the rotation barriers of the carbamate.) HRMS-ESI (m/z): Calculated for C<sub>18</sub>H<sub>15</sub>ClN<sub>3</sub>O<sub>2</sub> (M + H)<sup>+</sup>: 340.0853, Found: 340.0849.

**6-Chloro-2,3-dihydro-1H-cyclopenta[b]quinoxaline**

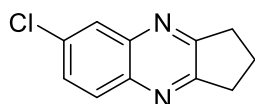

**3aj**

White solid, 13.2 mg, 32% yield. M.P.: 118.3-119.2 °C. <sup>1</sup>H NMR (500 MHz, CDCl<sub>3</sub>)  $\delta$  7.99 (d,  $J$  = 2.5 Hz, 1H), 7.93 (d,  $J$  = 9.0 Hz, 1H), 7.62 (dd,  $J$  = 9.0, 2.5 Hz, 1H), 3.20 (td,  $J$  = 7.5, 4.0 Hz, 4H), 2.32 (p,  $J$  = 7.5 Hz, 2H). <sup>13</sup>C NMR (126 MHz, CDCl<sub>3</sub>):  $\delta$  161.9, 161.1, 142.1, 140.2, 134.5, 130.0, 129.8, 128.0, 32.6, 32.5, 21.4. HRMS-ESI (m/z): Calculated for C<sub>11</sub>H<sub>10</sub>ClN<sub>2</sub> (M + H)<sup>+</sup>: 205.0533, Found: 205.0528.

#### 4. Reference

- (1) Yuan, Y.; Dong, W.; Gao, X.; Gao, H.; Xie, X.; Zhang, Z. *J. Org. Chem.* **2018**, *83*, 2840-2846.
- (2) Yu, X.-Y.; Chen, J.-R.; Wang, P.-Z.; Yang, M.-N.; Liang, D.; Xiao, W.-J. *Angew. Chem. Int. Ed.* **2018**, *57*, 738-743.
- (3) Chen, Y.; Feng, G. *Org. Biomol. Chem.* **2015**, *13*, 4260-4265.
- (4) Wang, S.; Yang, L.-J.; Zeng, J.-L.; Zheng, Y.; Ma, J.-A. *Org. Chem. Front.* **2015**, *2*, 1468-1474.
- (5) Sun, X.; Li, J.; Ni, Y.; Ren, D.; Hu, Z.; Yu, S. *Asian J. Org. Chem.* **2014**, *3*, 1317-1325.
- (6) Yuan, Y.; Dong, W.; Gao, X.; Xie, X.; Zhang, Z. *Org. Lett.* **2019**, *21*, 469-472.
- (7) Yin, Z.; Rabeah, J.; Brückner, A.; Wu, X.-F. *ACS Catal.* **2018**, *8*, 10926-10930.
- (8) He, B.-Q.; Yu, X.-Y.; Wang, P.-Z.; Chen, J.-R.; Xiao, W.-J. *Chem. Commun.* **2018**, *54*, 12262-12265.
- (9) Yu, X.-Y.; Zhao, Q.-Q.; Chen, J.; Chen, J.-R.; Xiao, W.-J. *Angew. Chem. Int. Ed.* **2018**, *57*, 15505-15509.
- (10) Ai, W.; Liu, Y.; Wang, Q.; Lu, Z.; Liu, Q. *Org. Lett.* **2018**, *20*, 409-412.

## 5. NMR Spectra of Substrates and Products

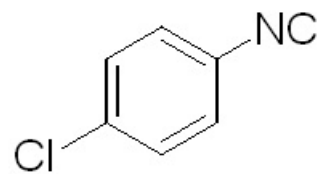

**1a**

$^1\text{H}$  NMR (400 MHz,  $\text{CDCl}_3$ )

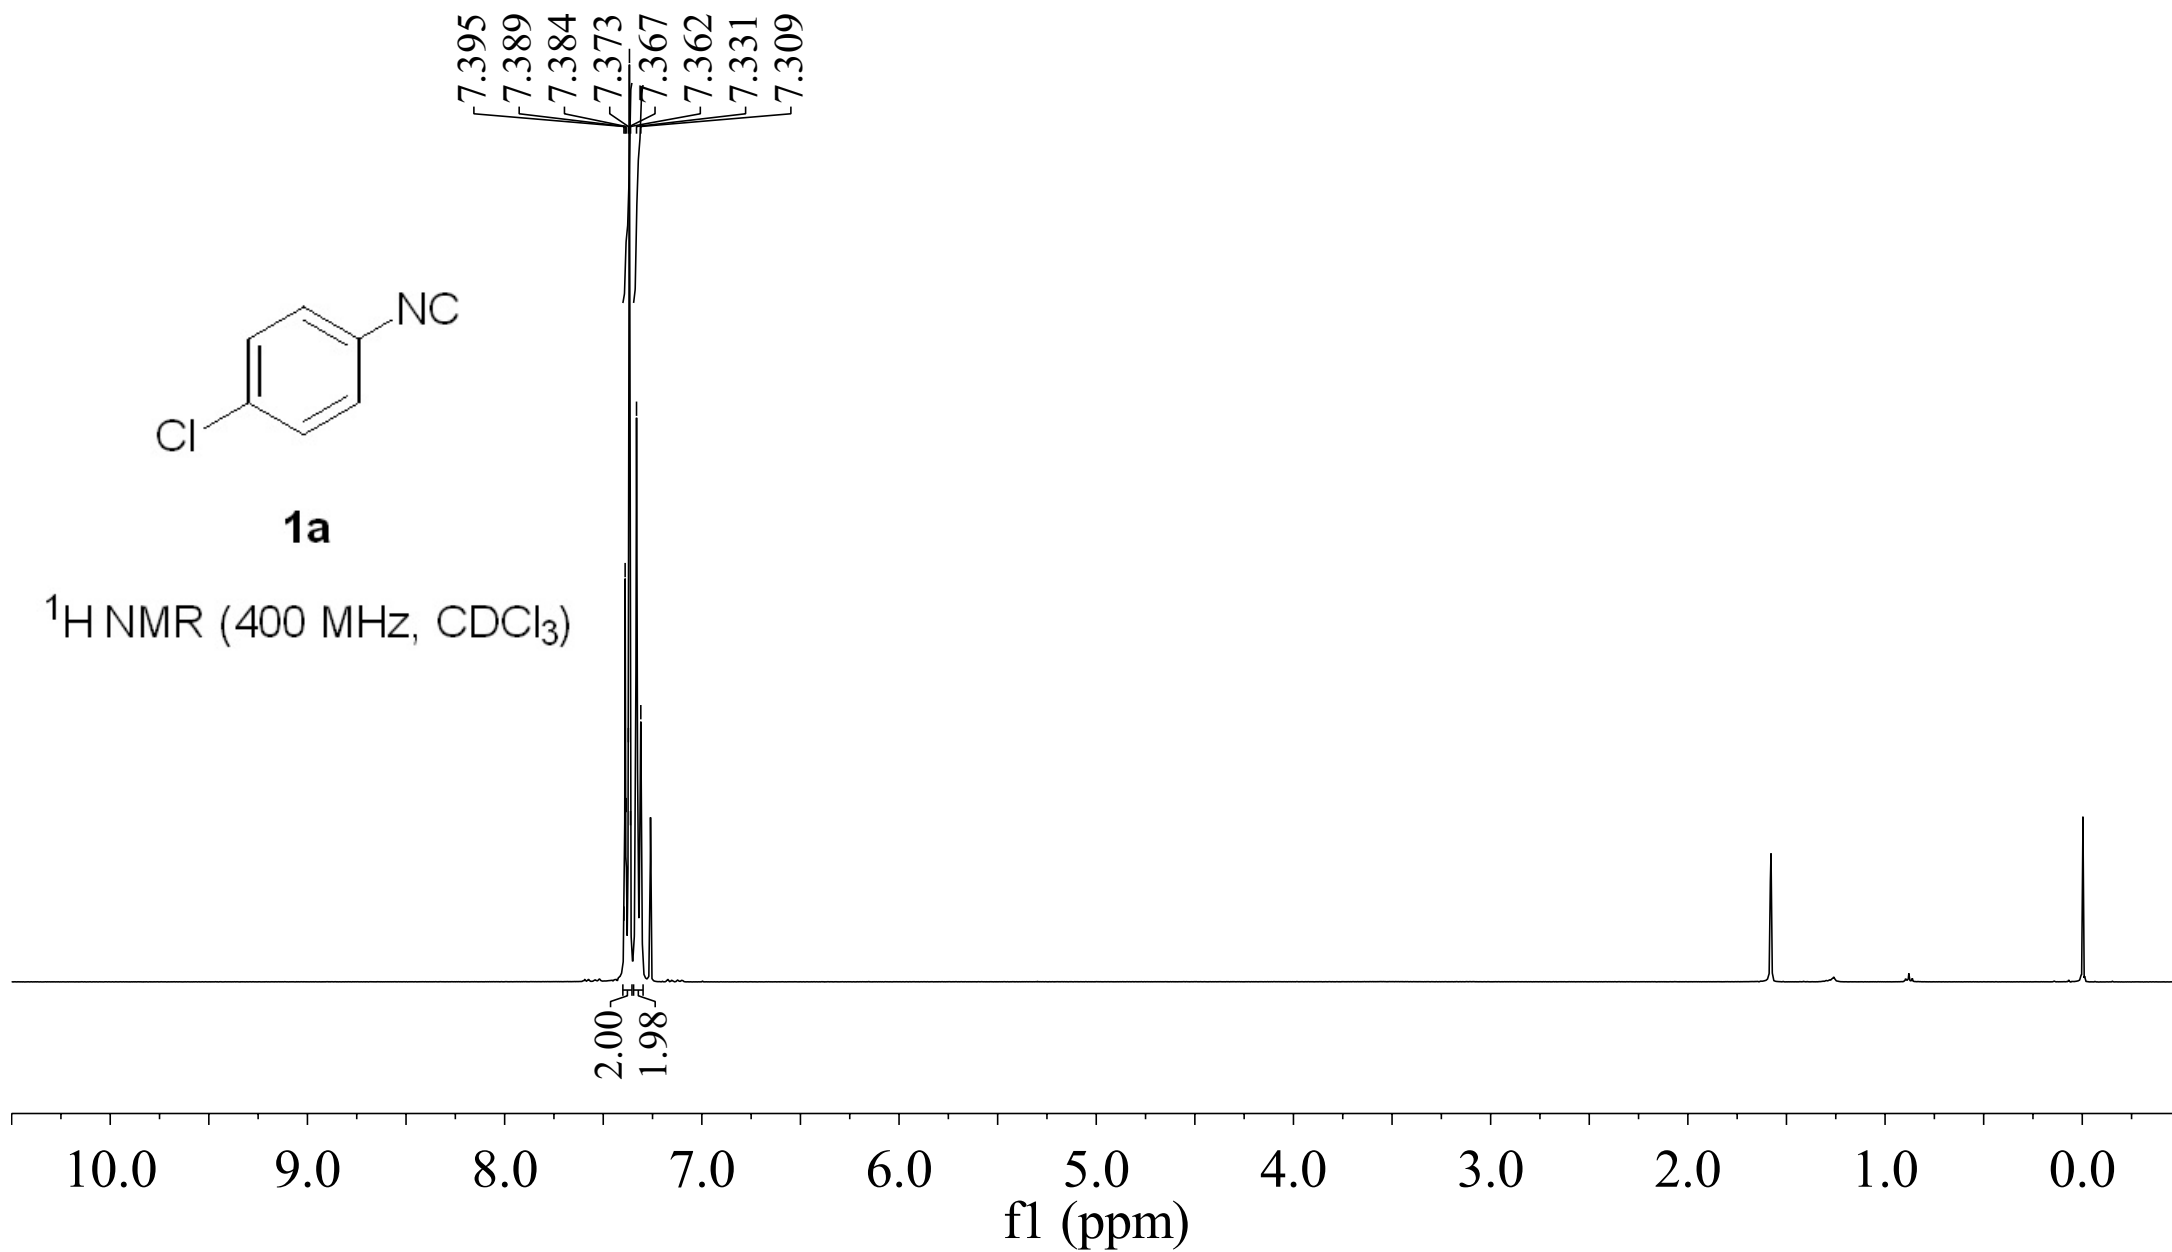

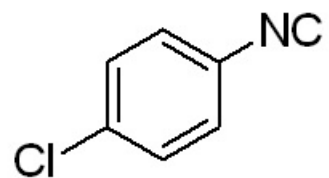

**1a**

$^{13}\text{C}$  NMR (101 MHz,  $\text{CDCl}_3$ )

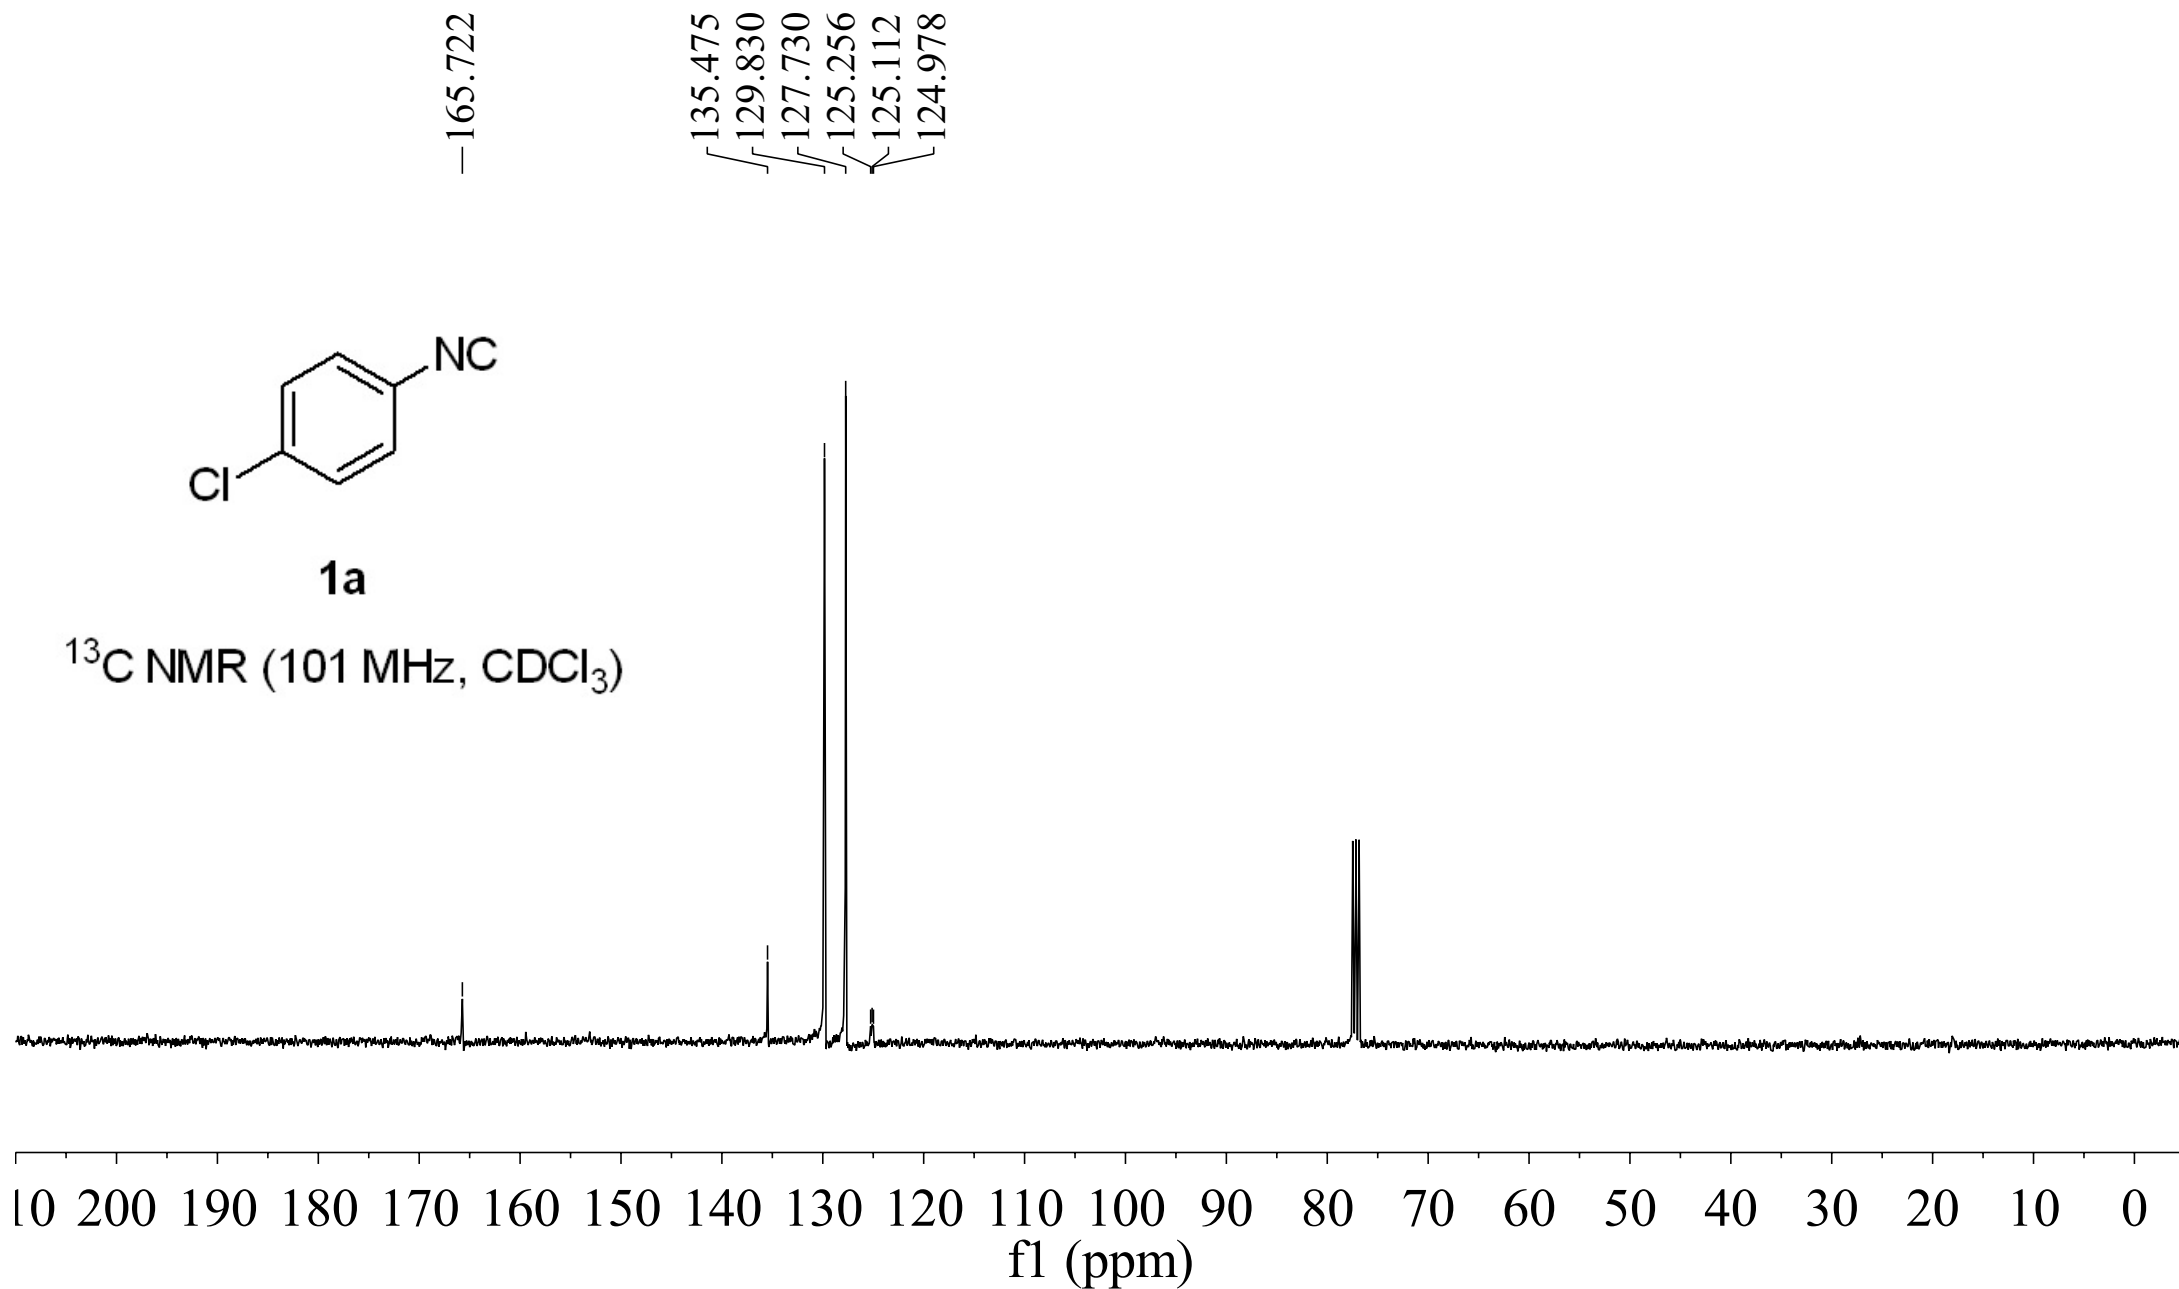



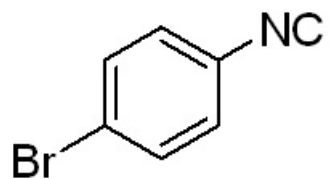

**1b**

$^1\text{H}$  NMR (400 MHz,  $\text{CDCl}_3$ )

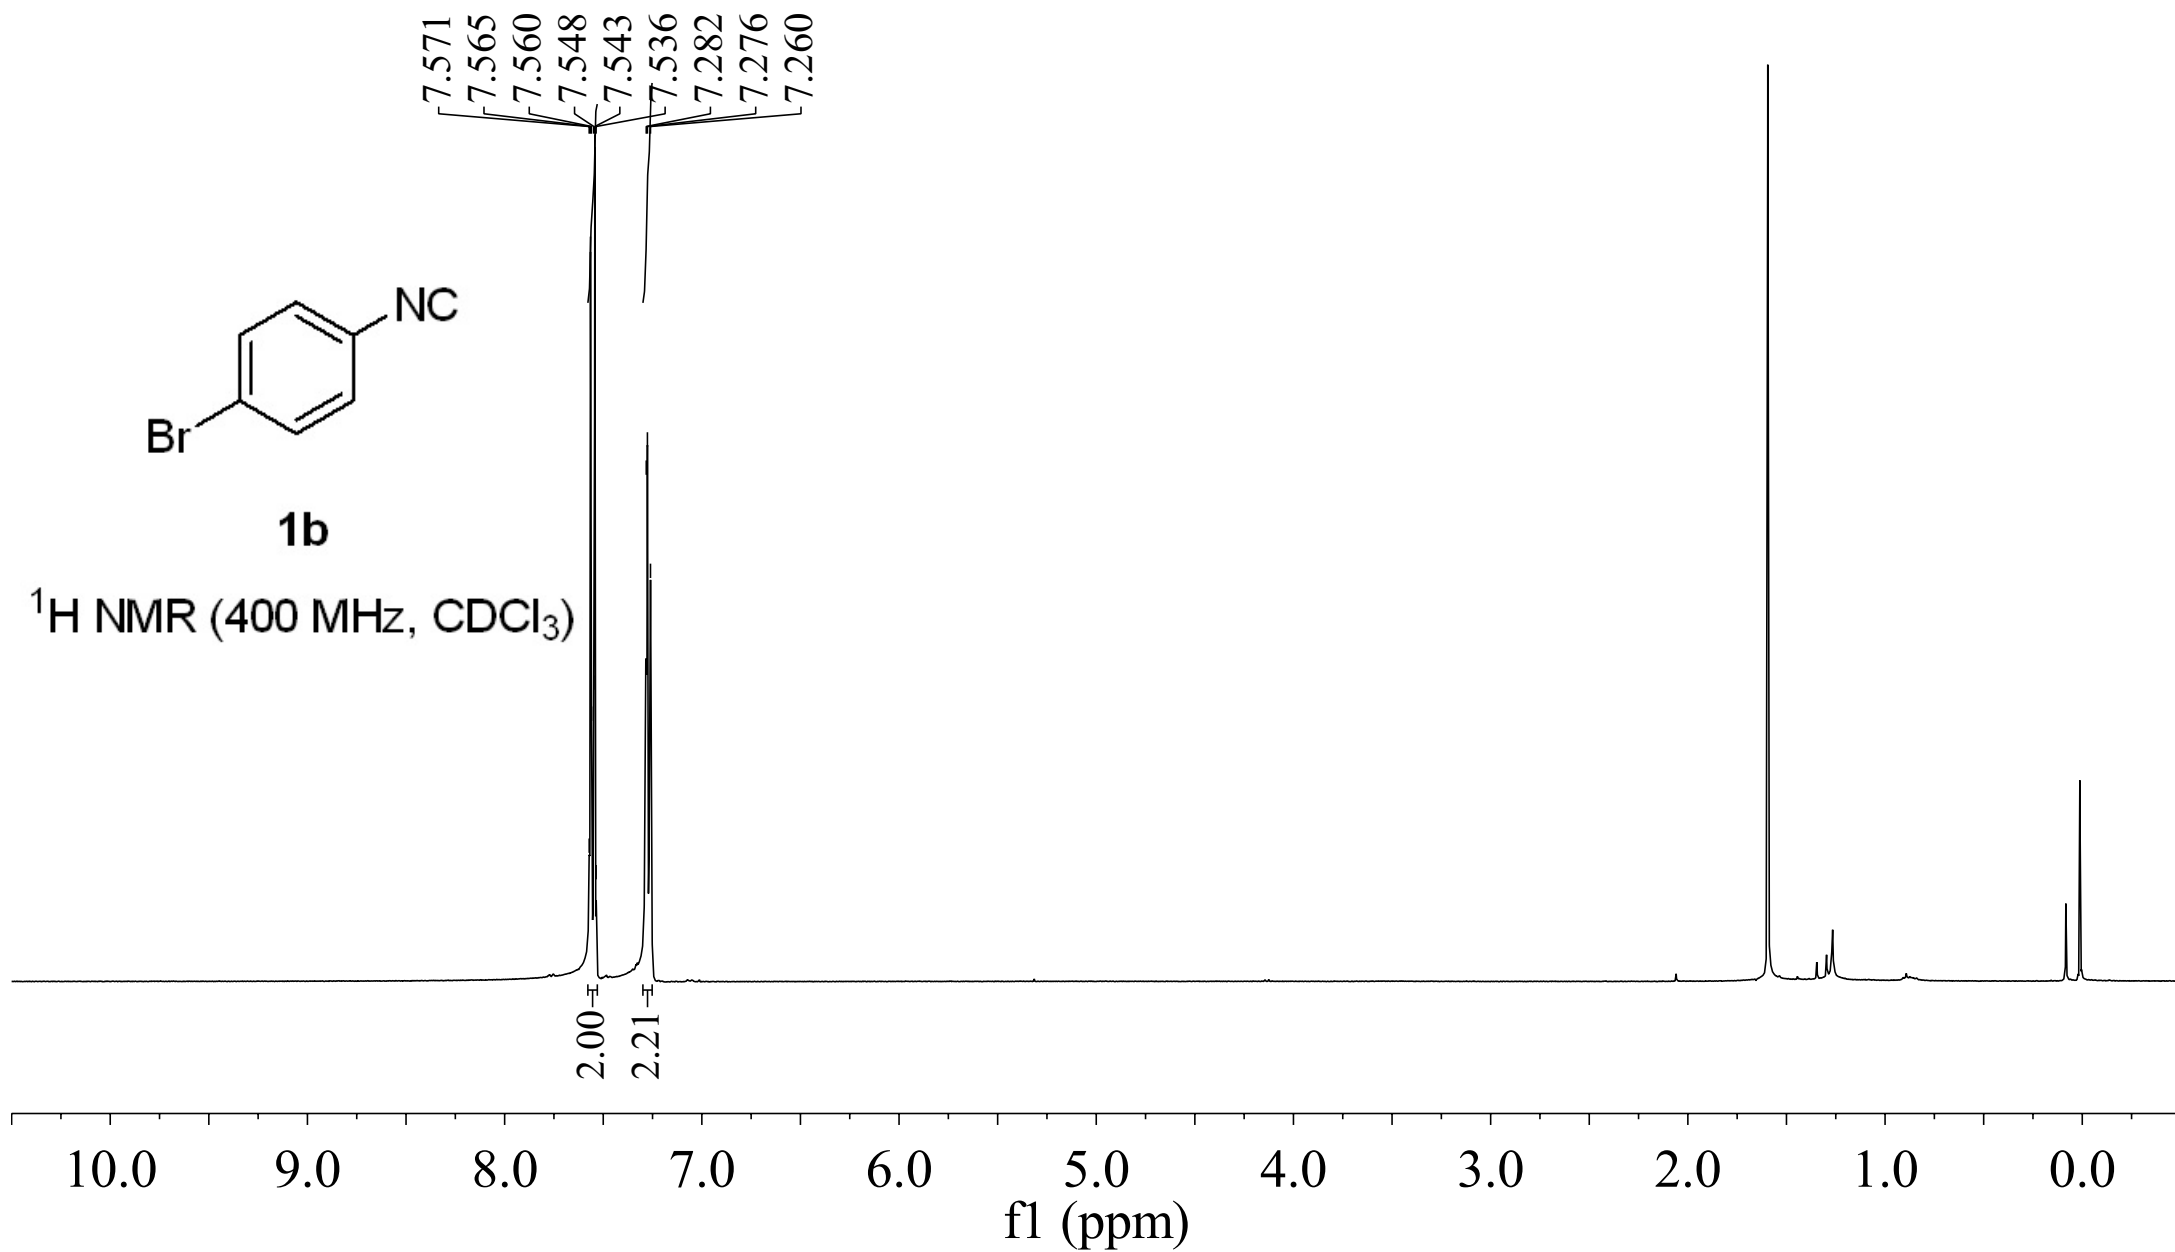

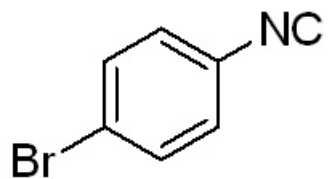

**1b**

$^{13}\text{C}$  NMR (101 MHz,  $\text{CDCl}_3$ )

—165.911

132.809  
127.937  
125.715  
125.582  
125.448  
123.502

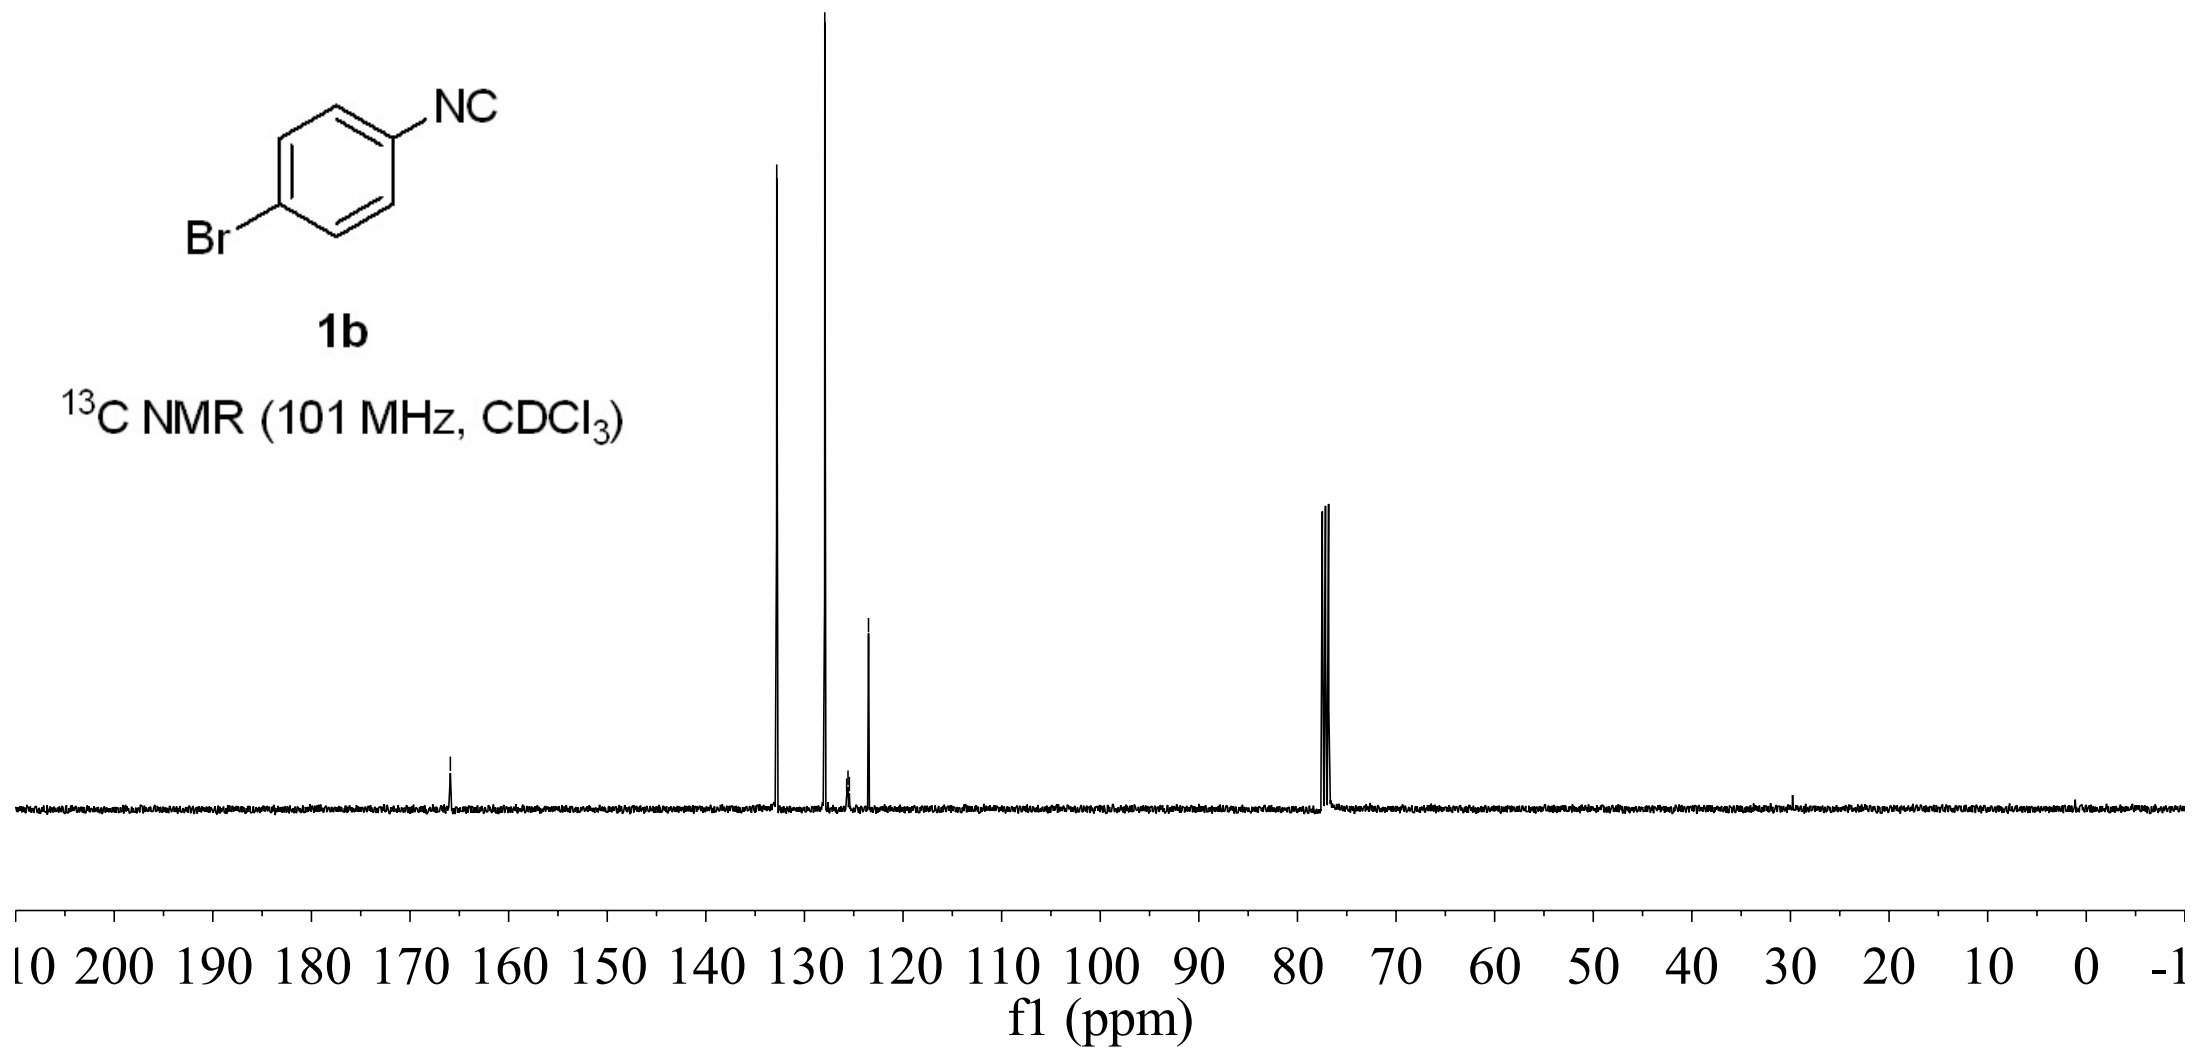

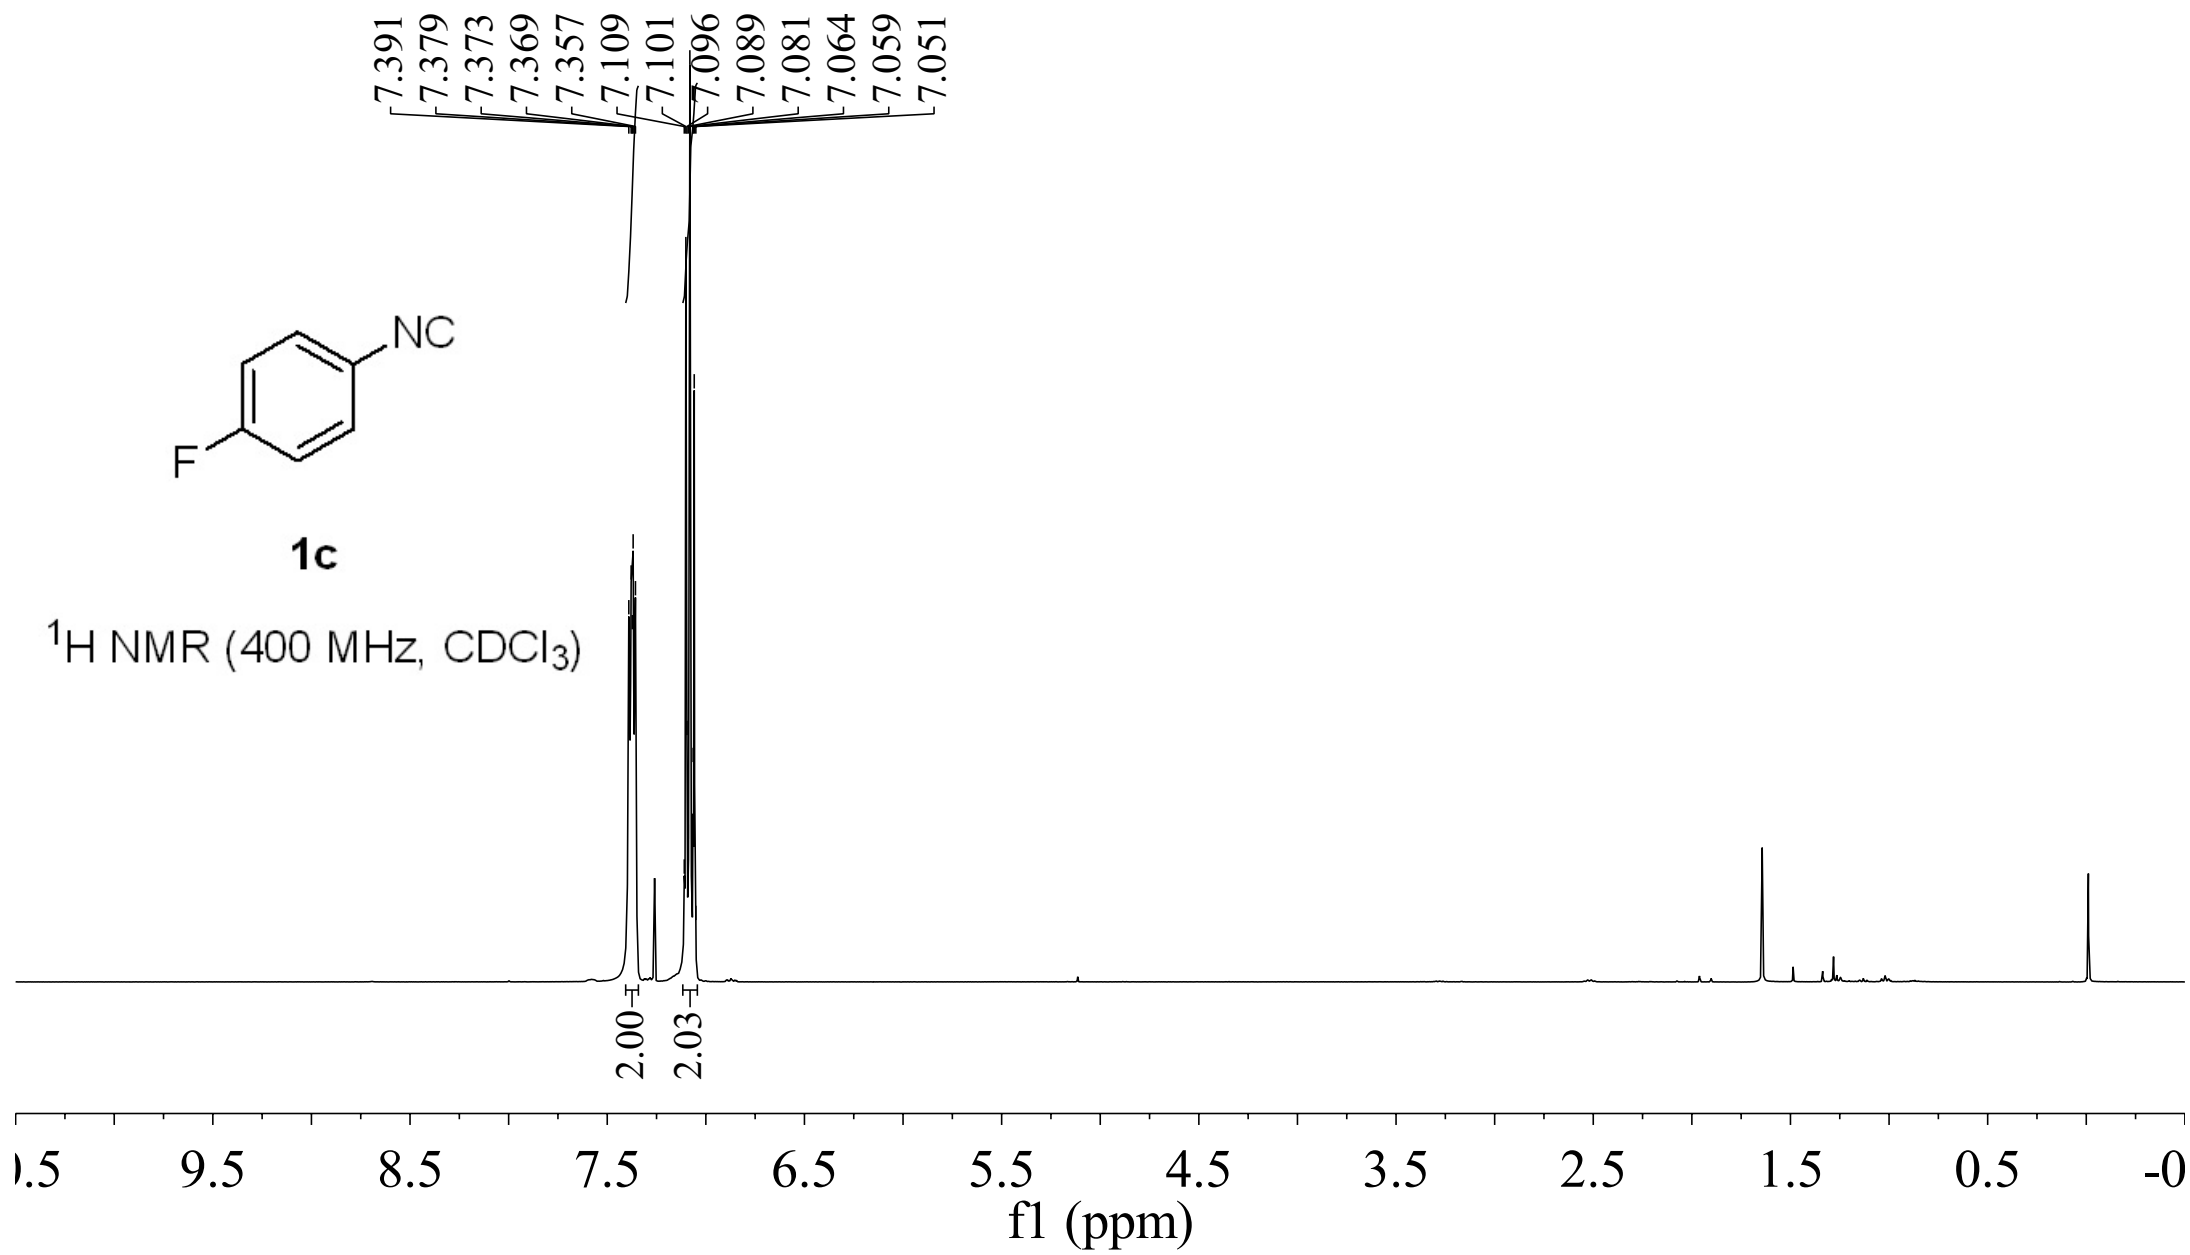

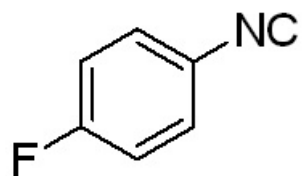

1c

$^{13}\text{C}$  NMR (101 MHz,  $\text{CDCl}_3$ )

164.445  
163.471  
160.972

128.363  
128.274  
122.904  
122.874  
122.767  
122.735  
122.625  
122.597  
116.673  
116.439

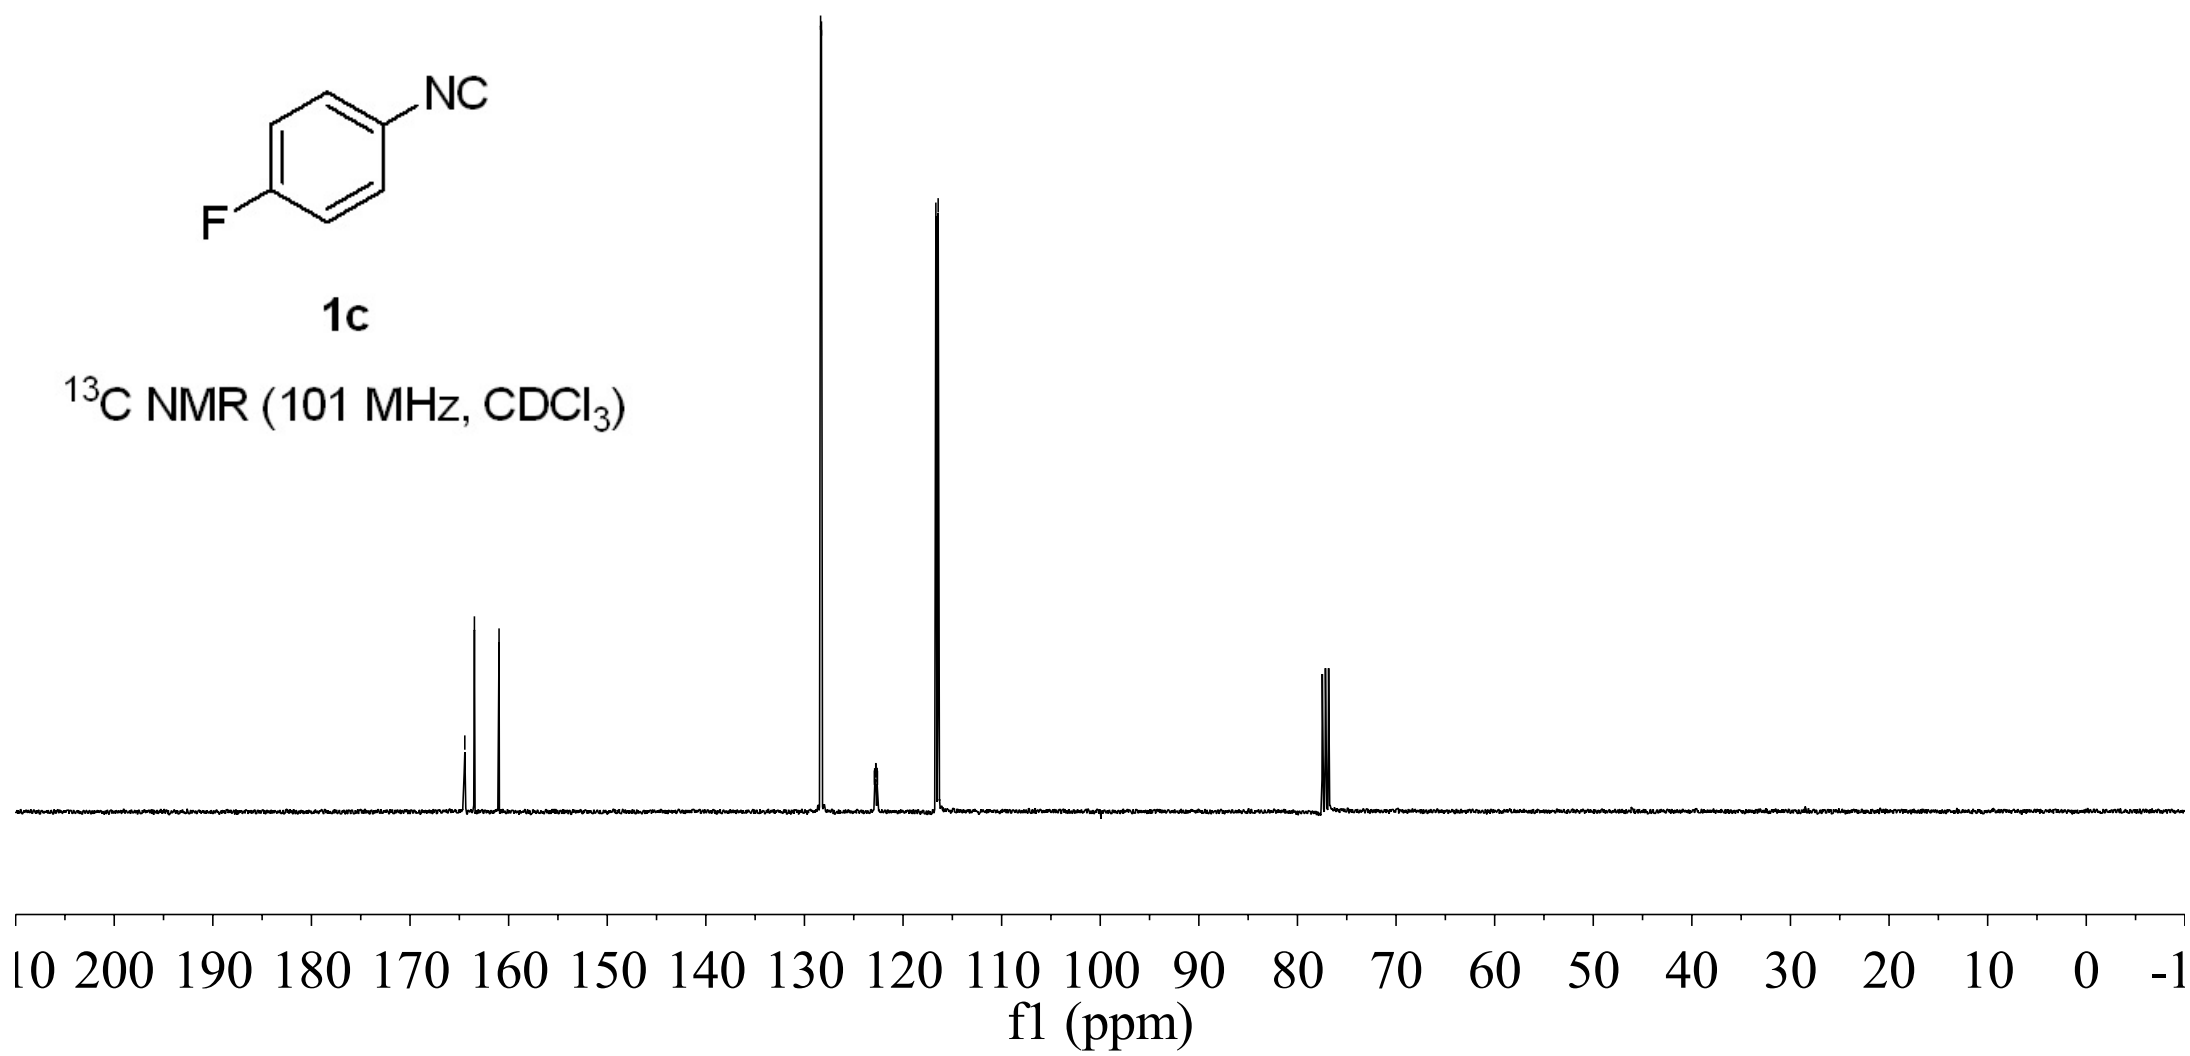

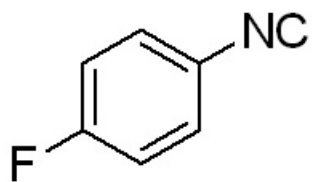

**1c**

<sup>19</sup>F NMR (376 MHz, CDCl<sub>3</sub>)

--108.757

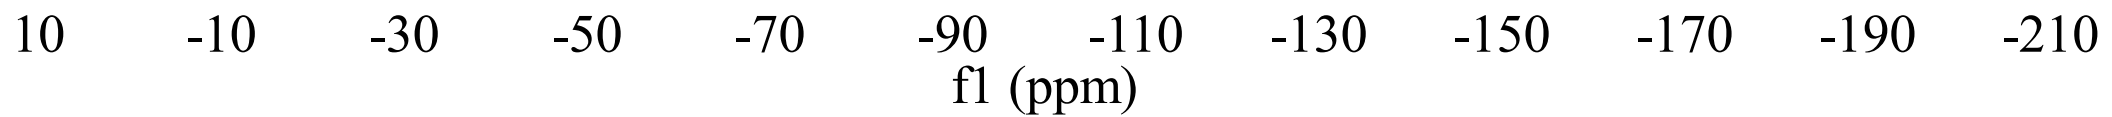

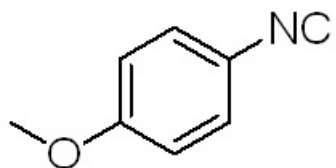

**1d**

<sup>1</sup>H NMR (400 MHz, CDCl<sub>3</sub>)

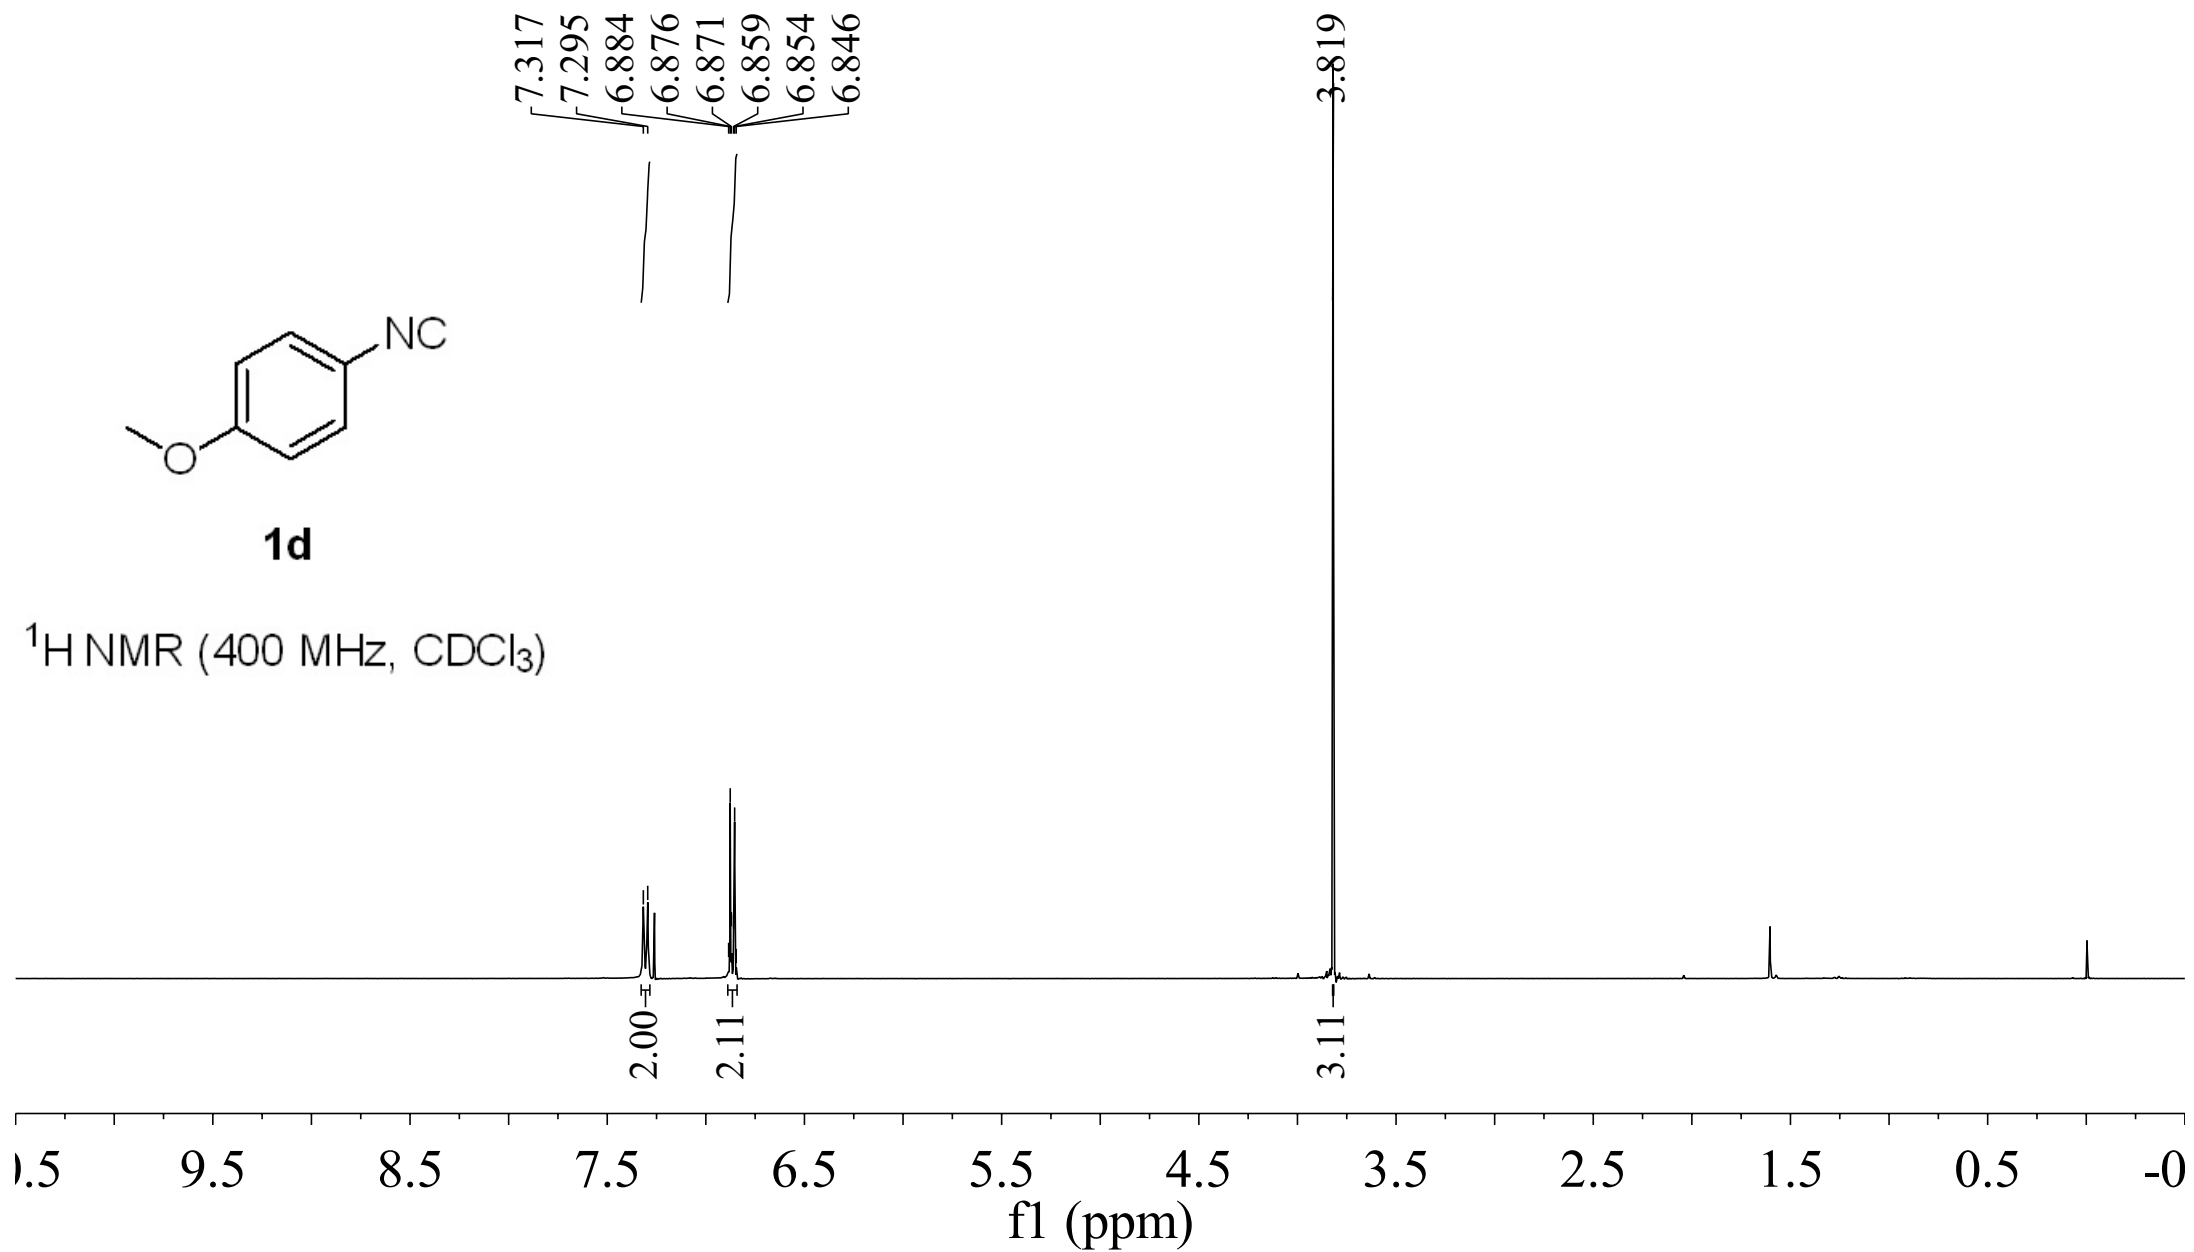

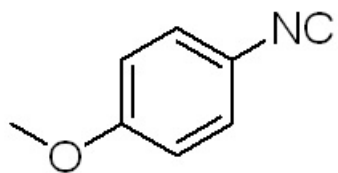

**1d**

$^{13}\text{C}$  NMR (101 MHz,  $\text{CDCl}_3$ )

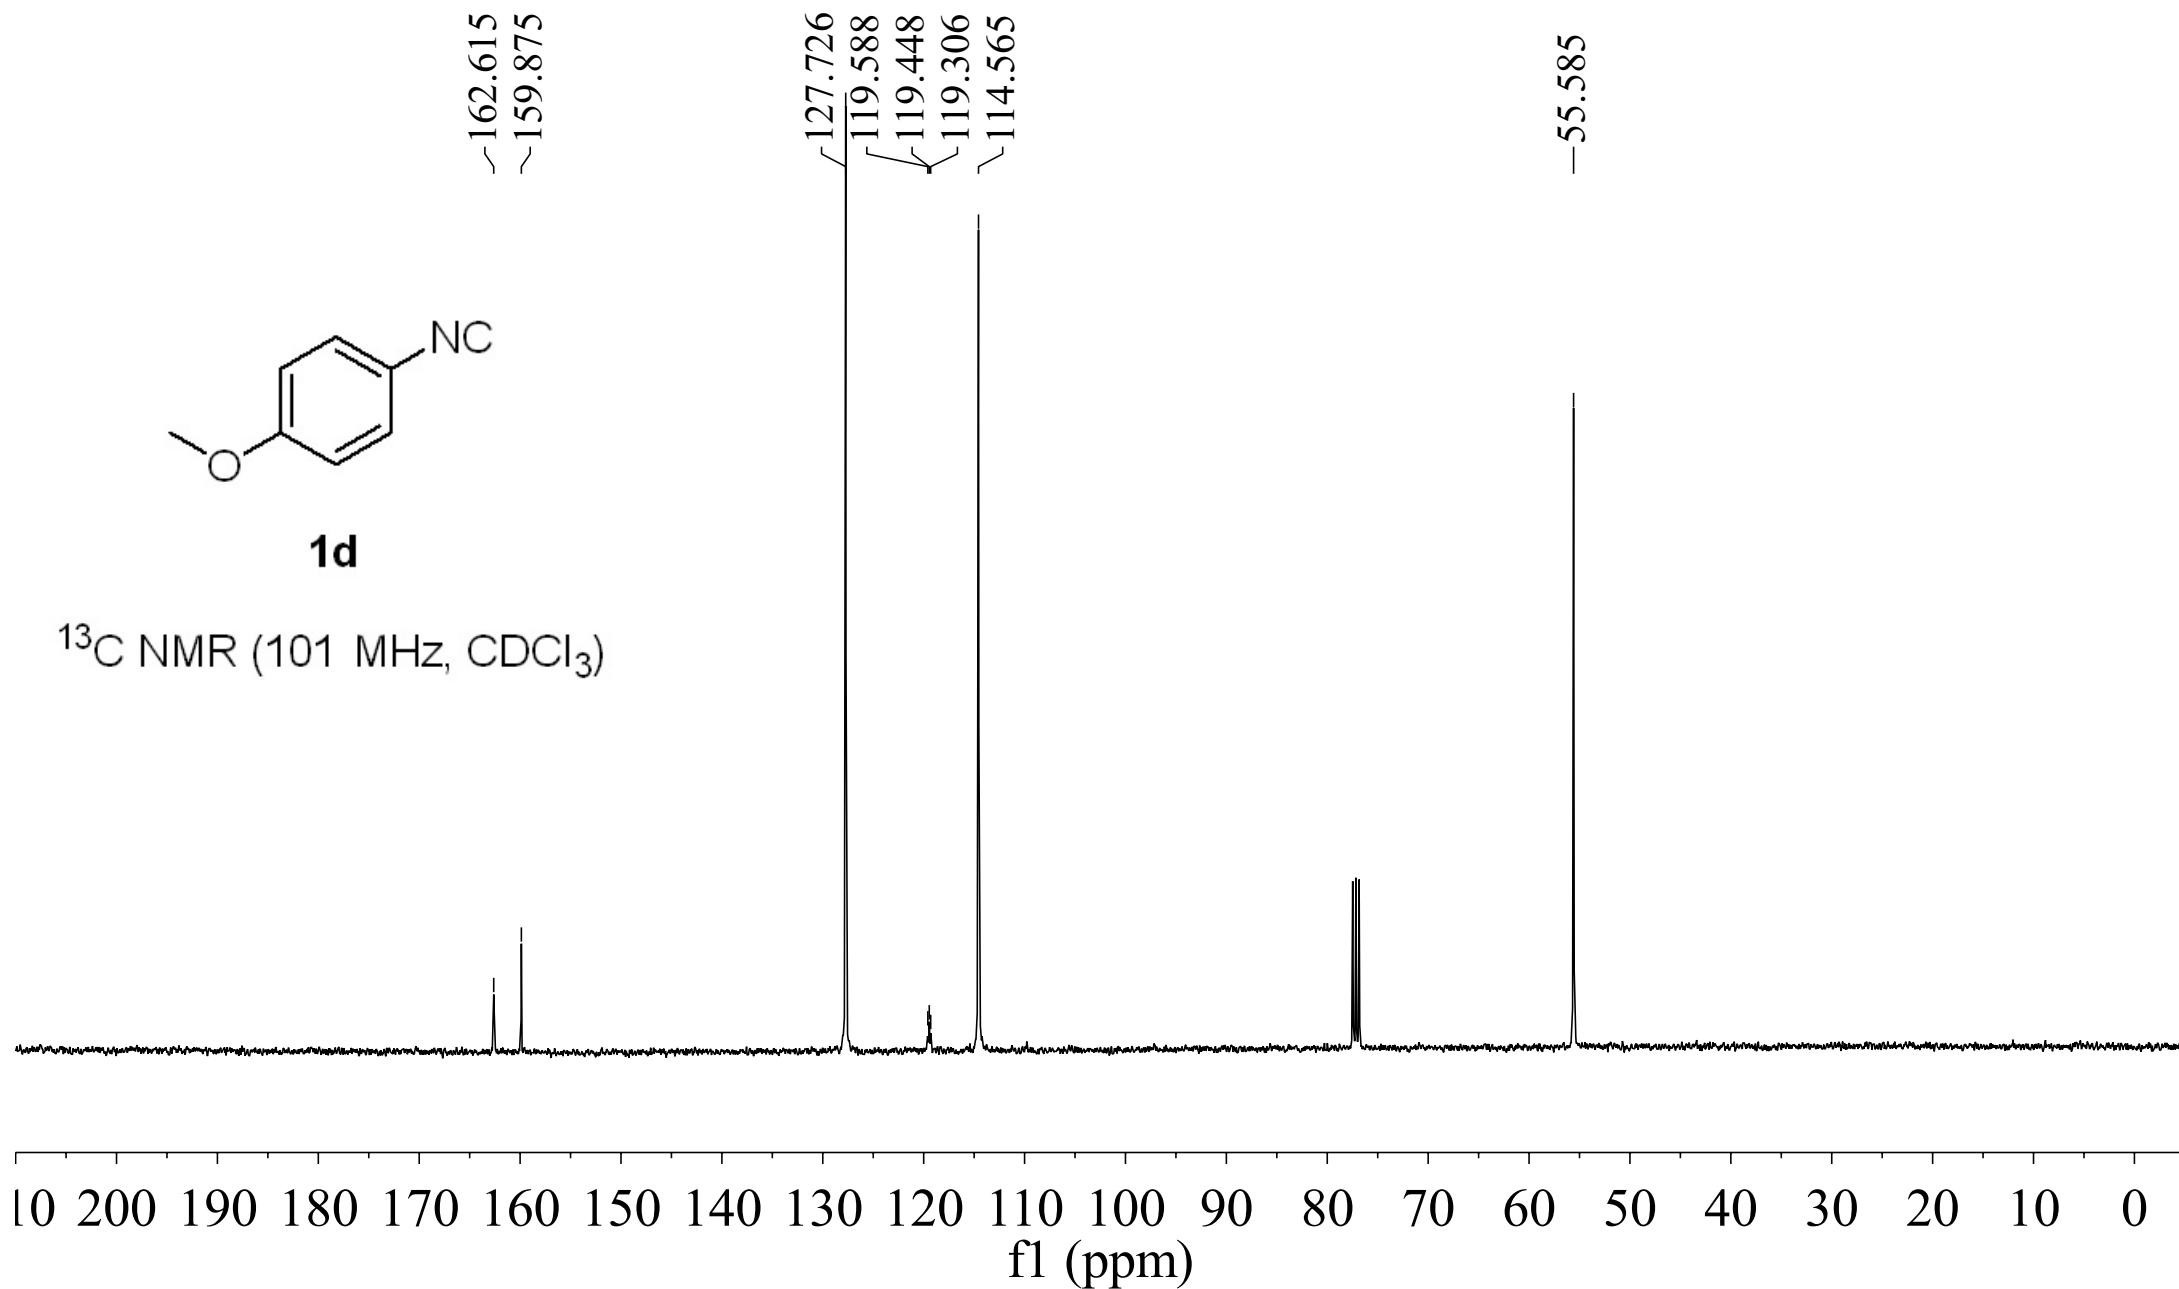

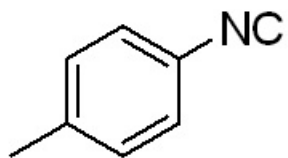

**1e**

<sup>1</sup>H NMR (400 MHz, CDCl<sub>3</sub>)

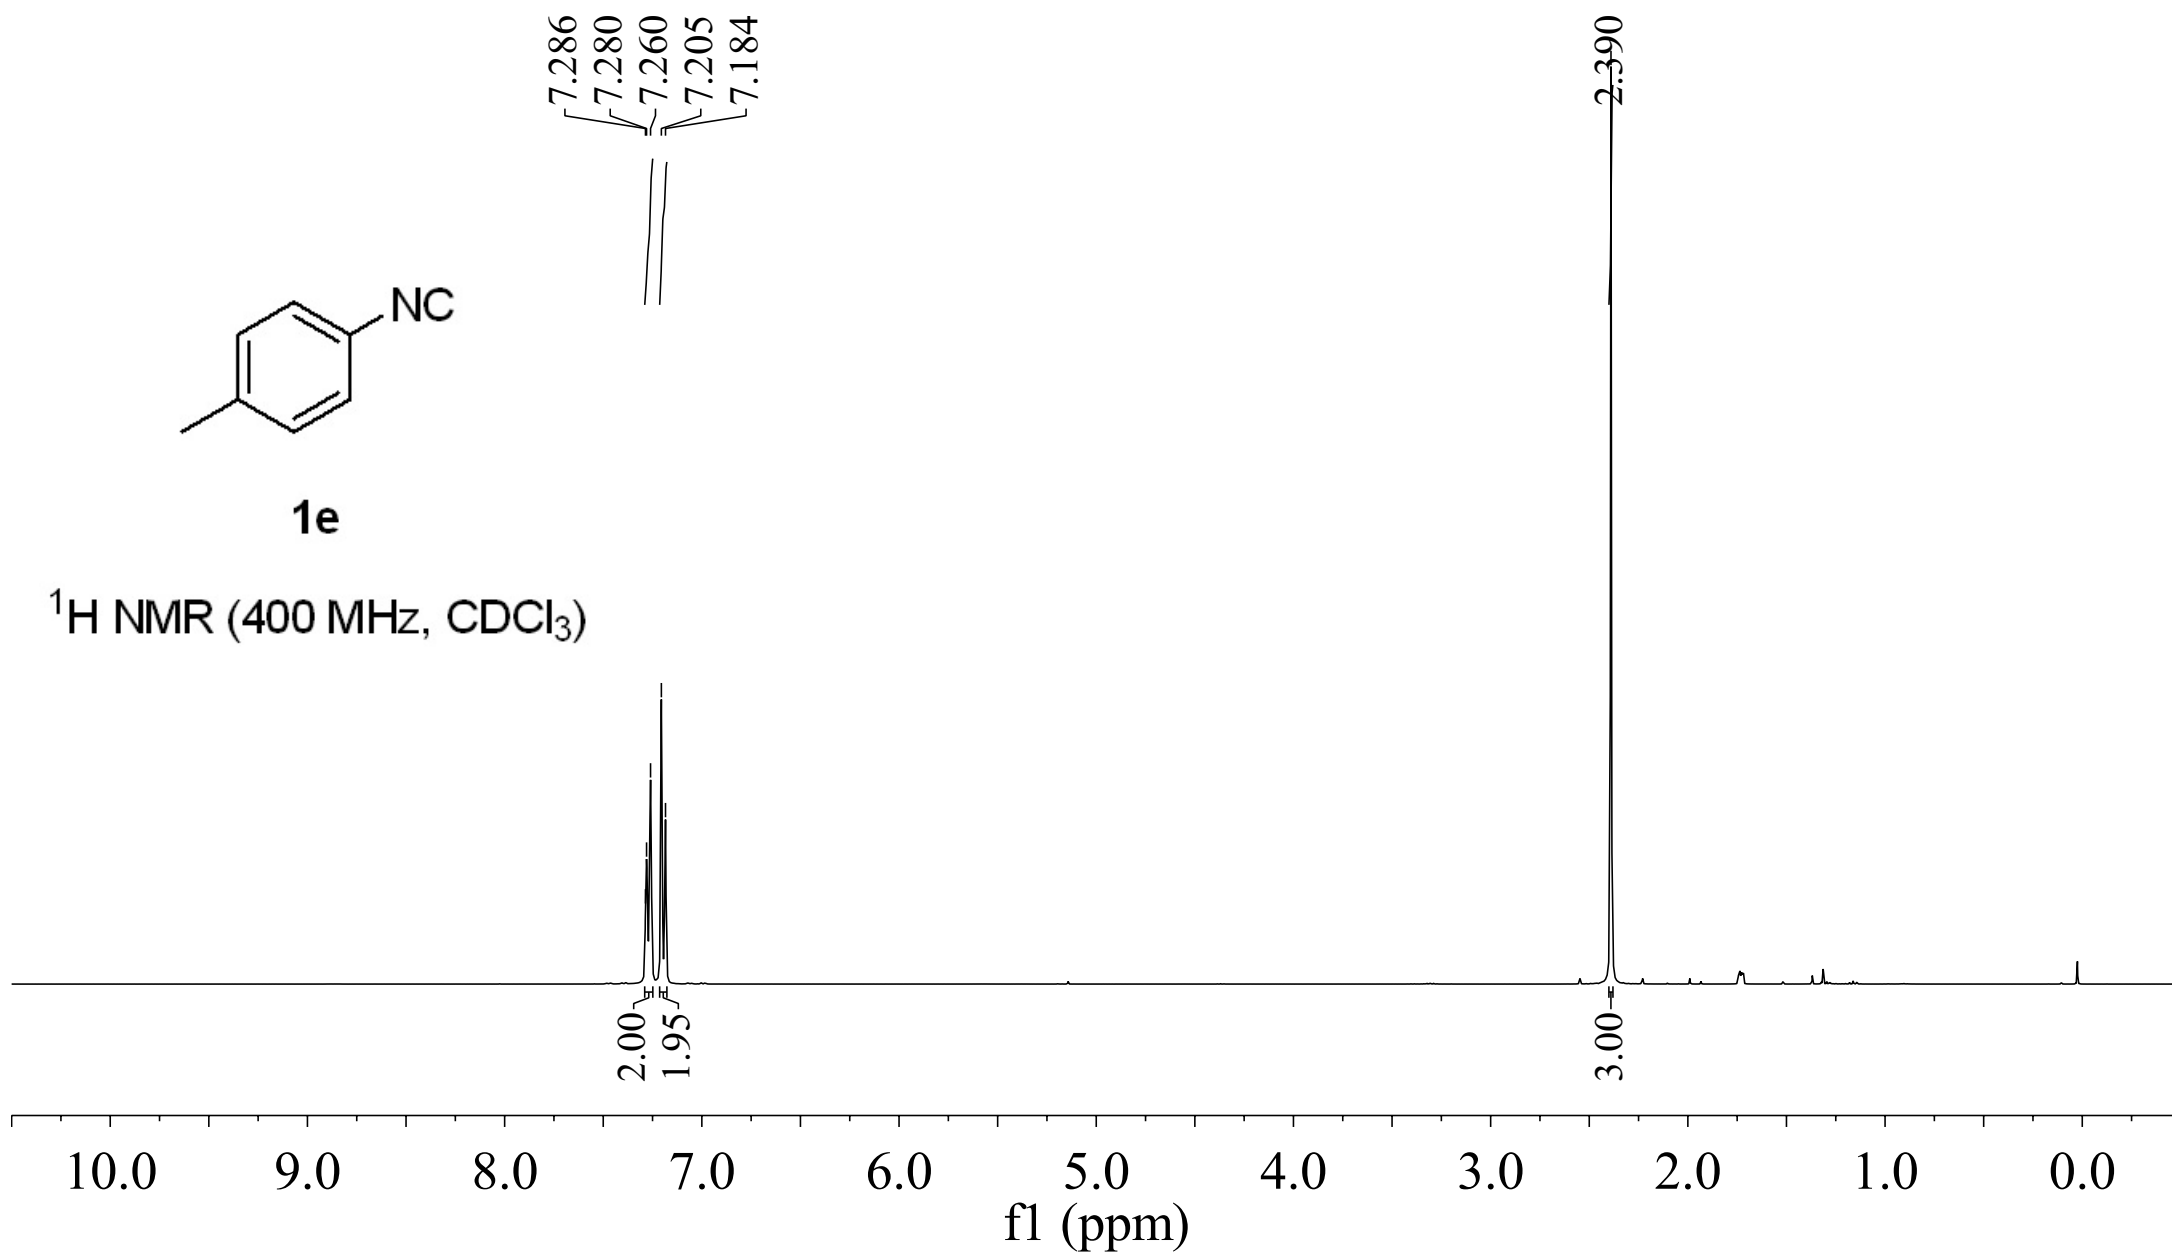



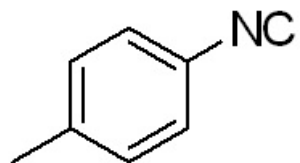

**1e**

$^{13}\text{C}$  NMR (101 MHz,  $\text{CDCl}_3$ )

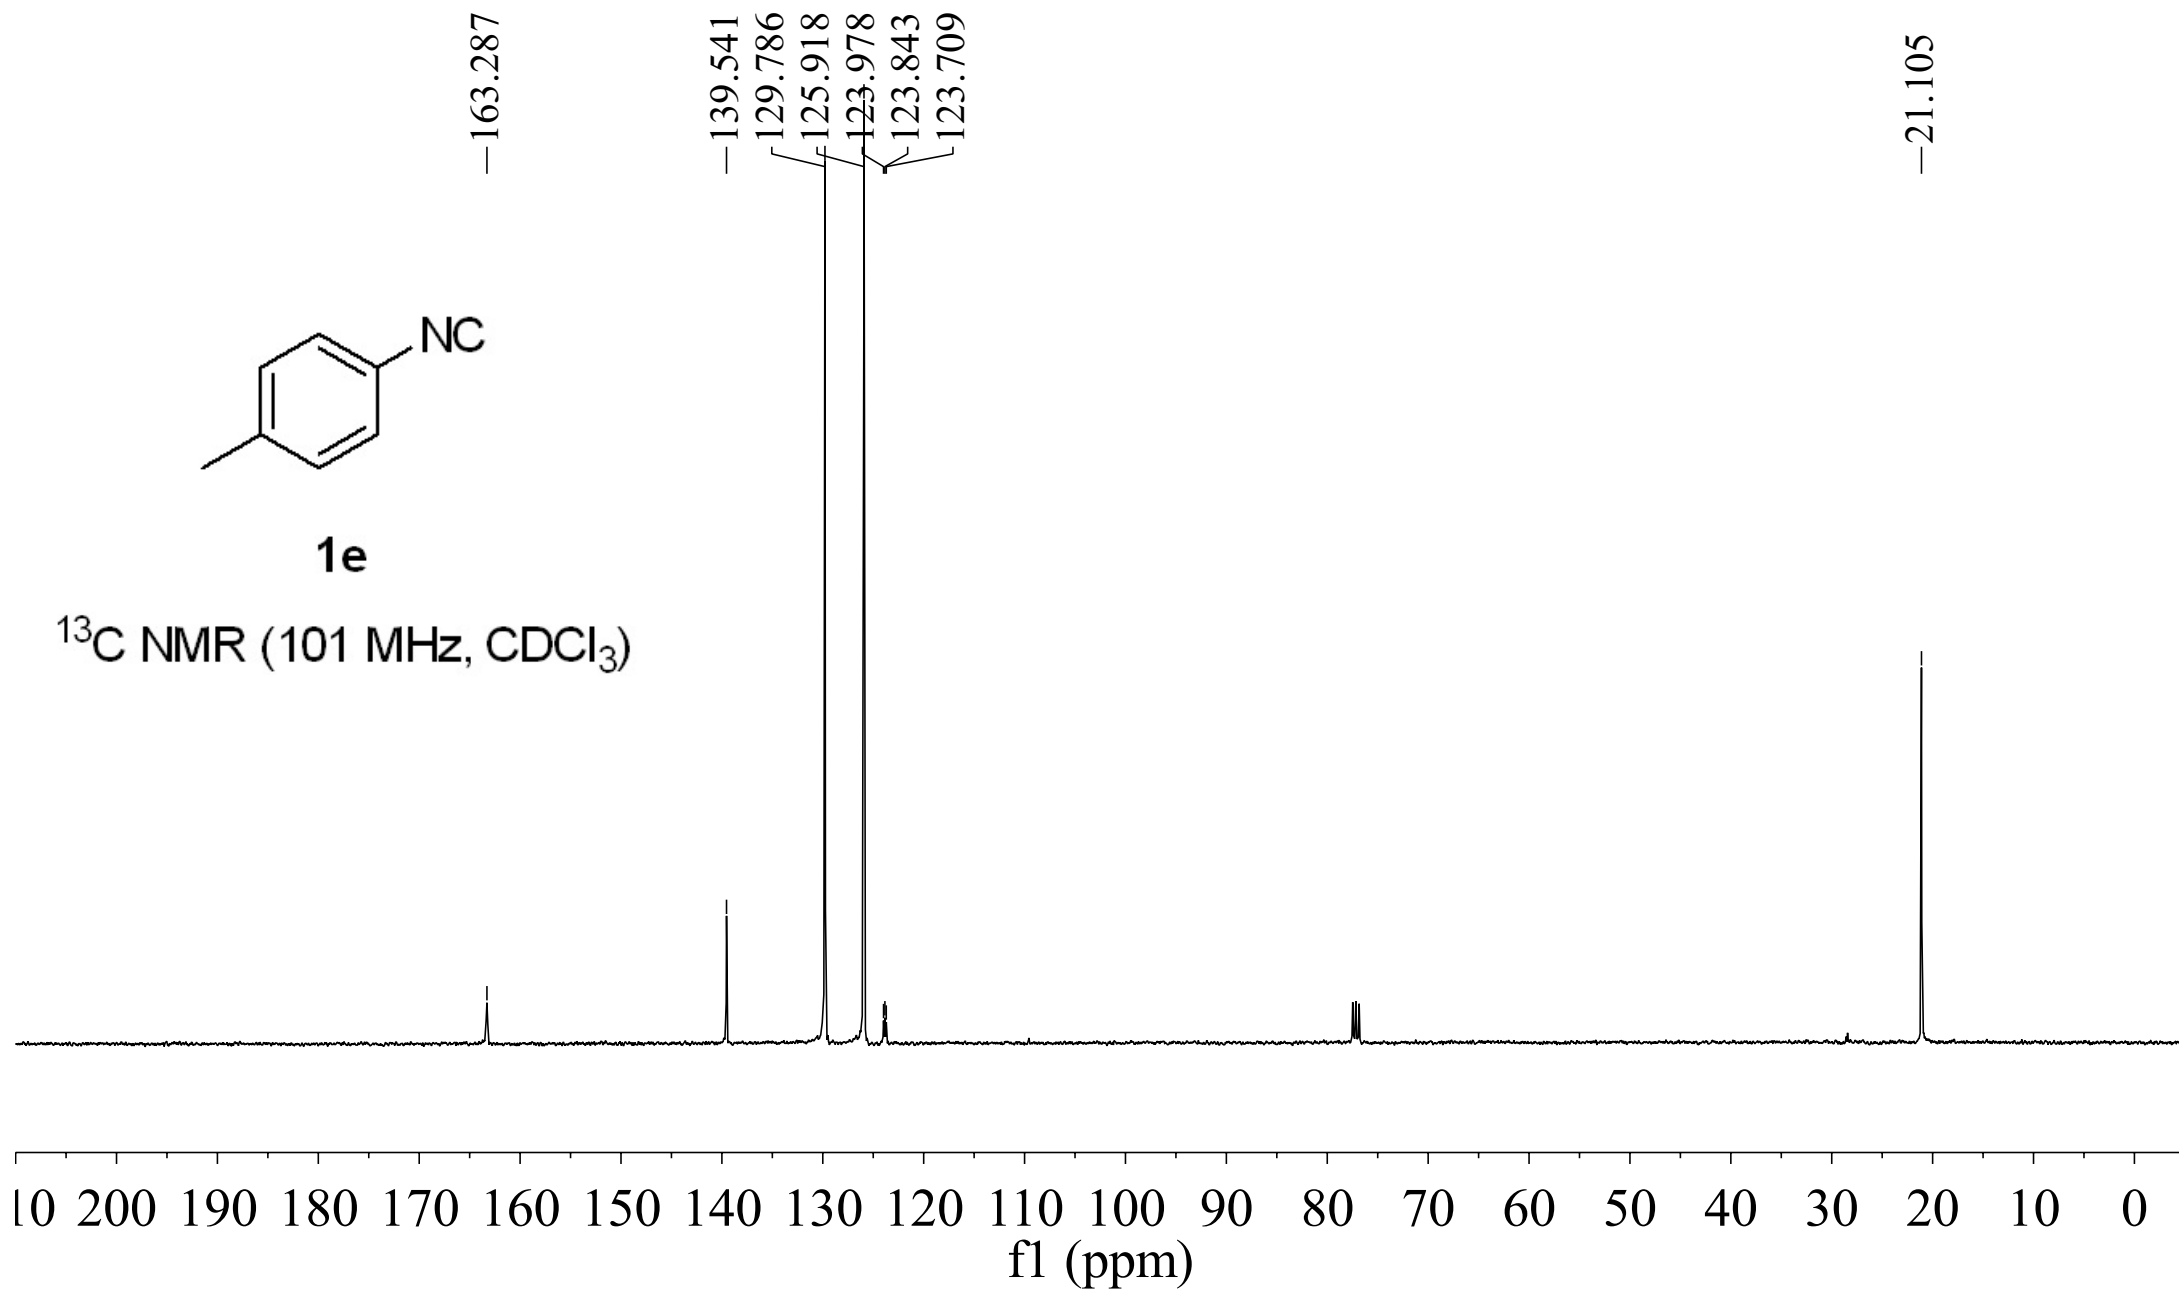

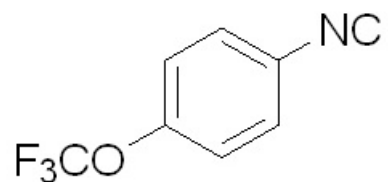

**1f**

$^1\text{H}$  NMR (400 MHz,  $\text{CDCl}_3$ )

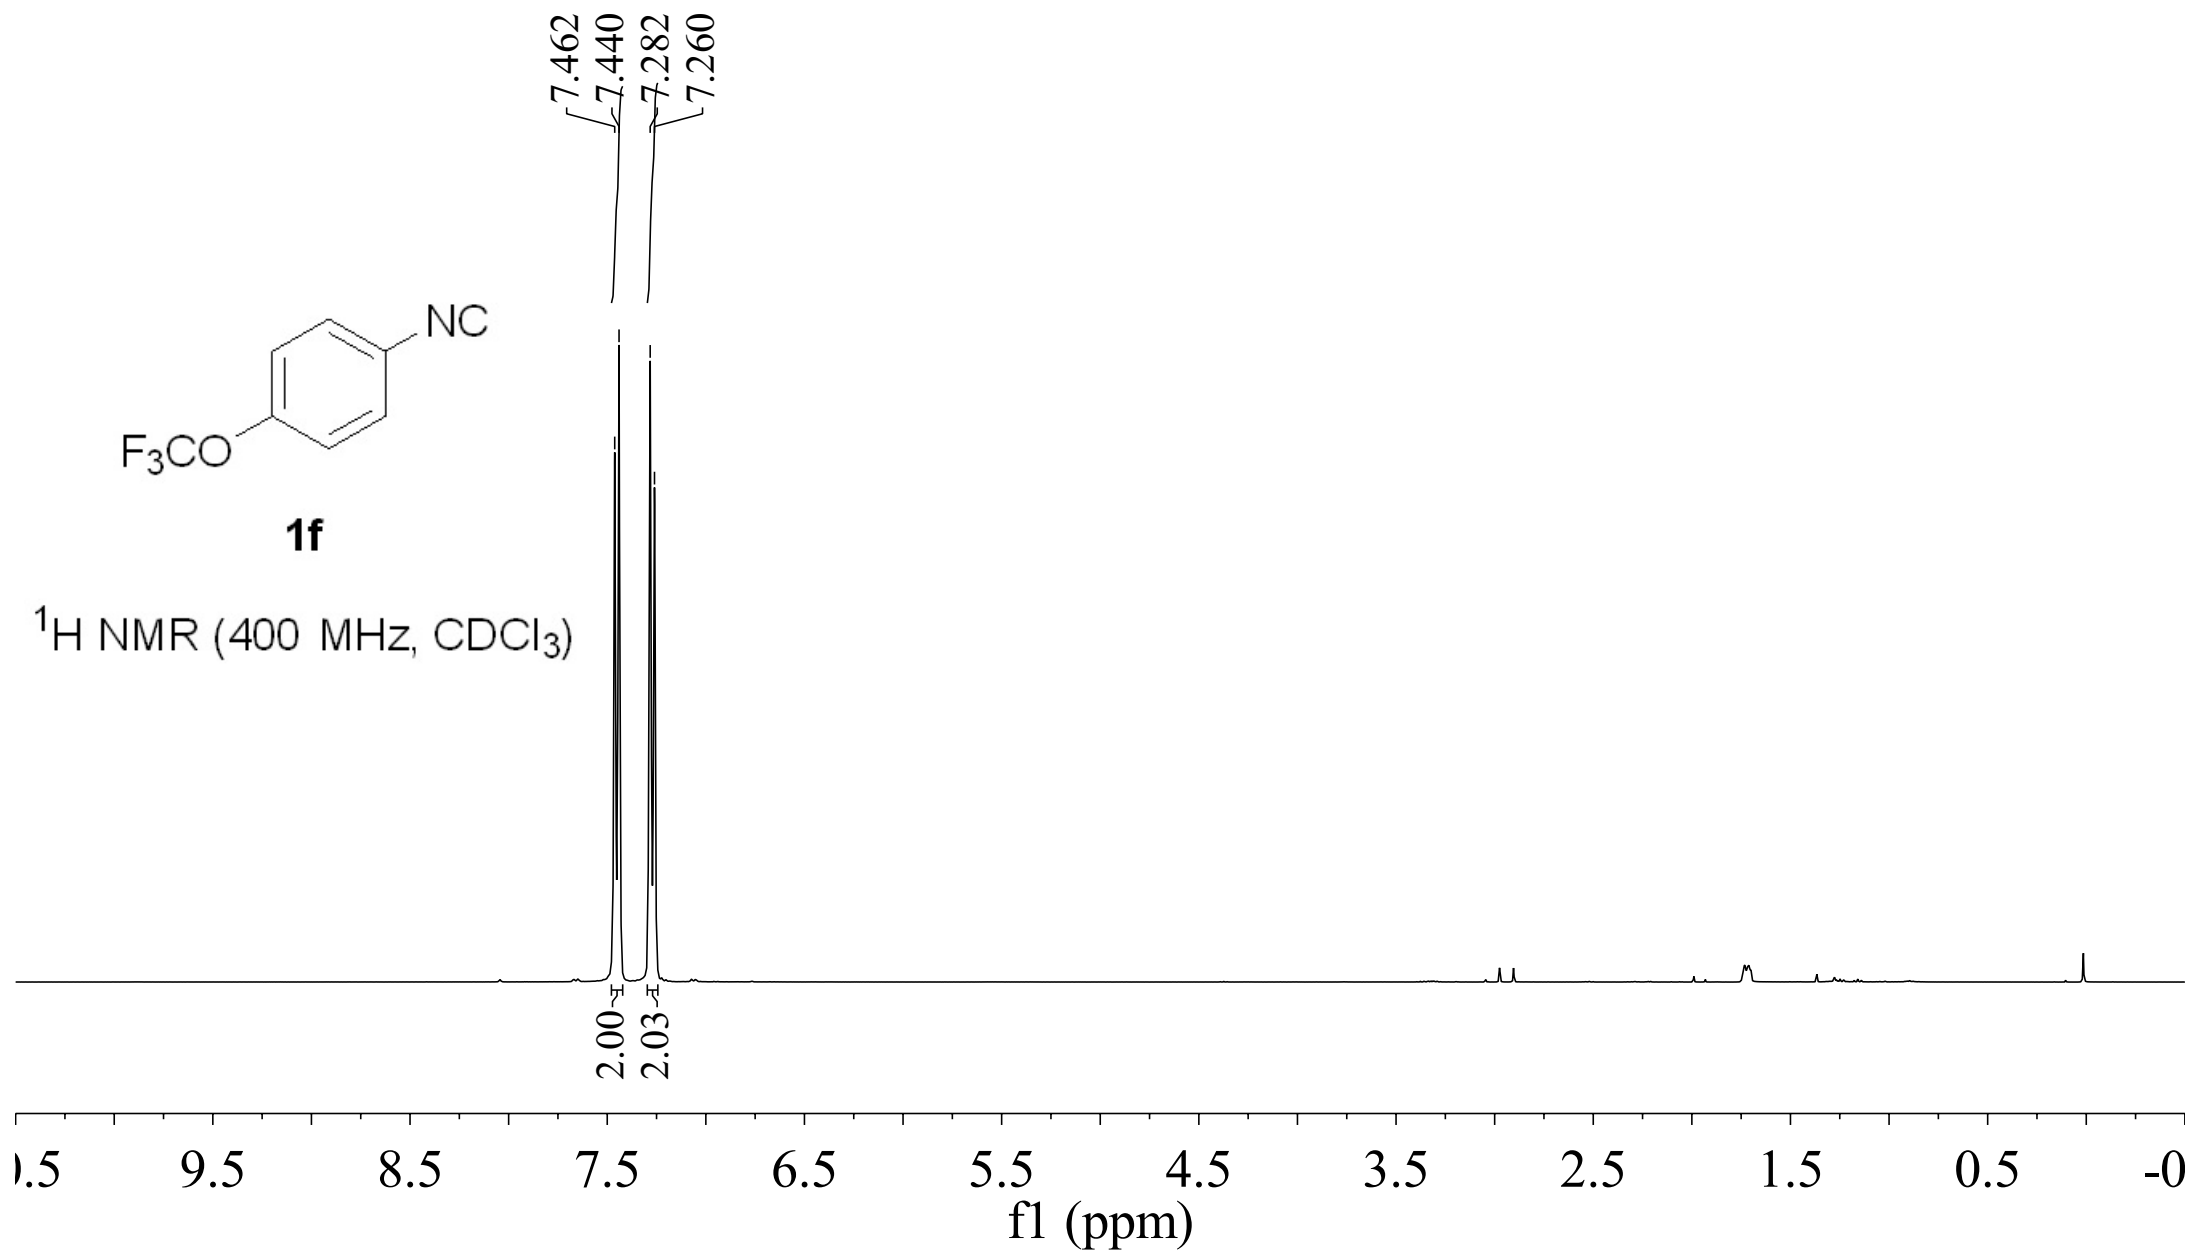

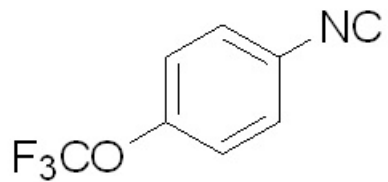

**1f**

$^{13}\text{C}$  NMR (101 MHz,  $\text{CDCl}_3$ )

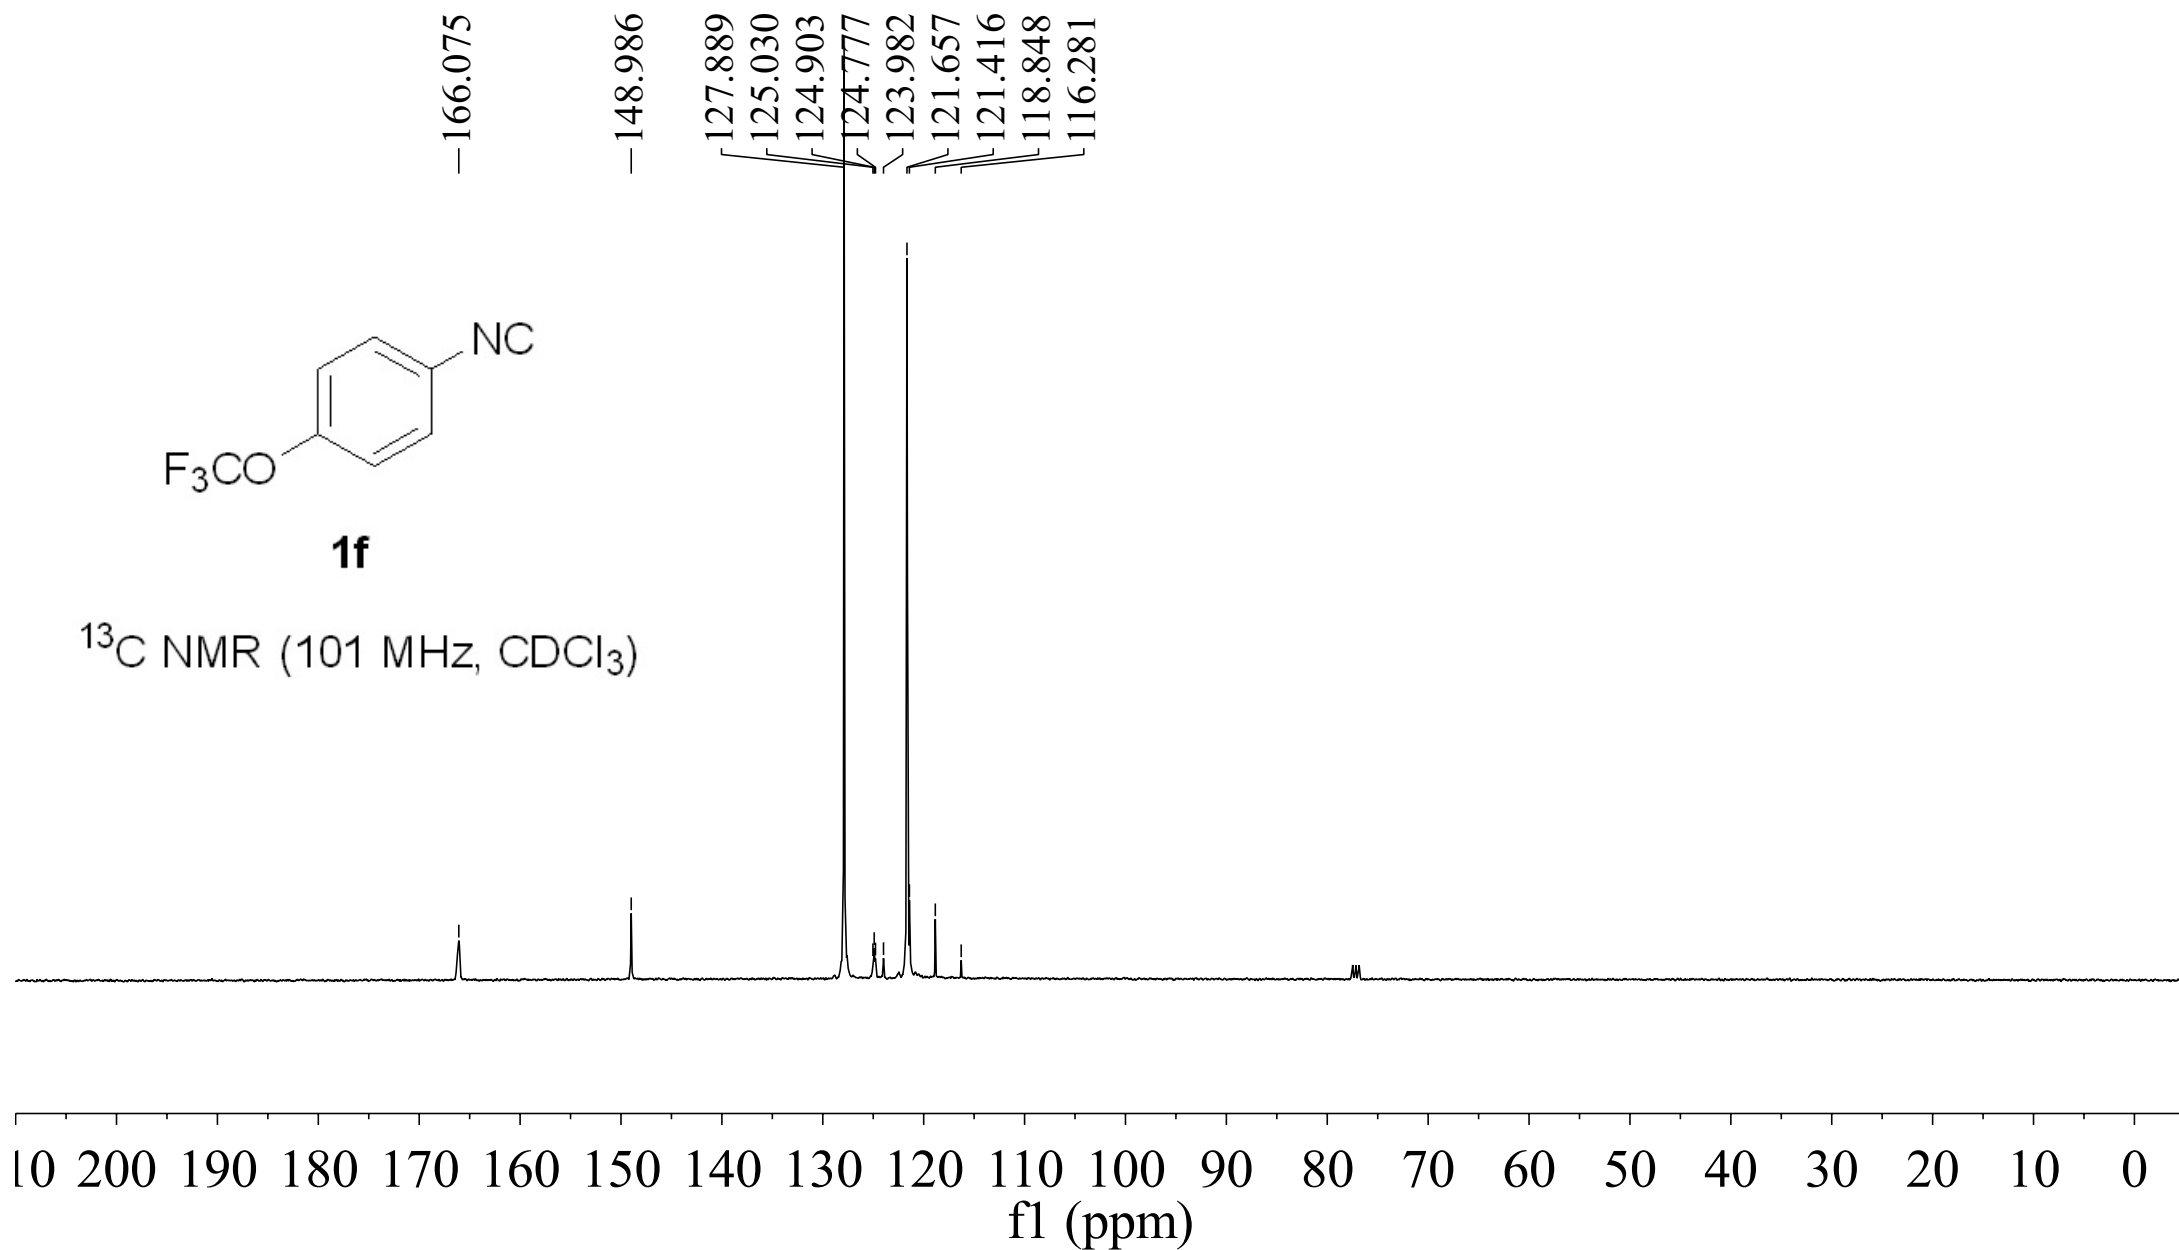

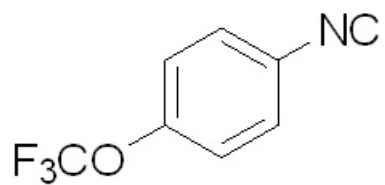

**1f**

$^{19}\text{F}$  NMR (376 MHz,  $\text{CDCl}_3$ )

--58.119

10    -10    -30    -50    -70    -90    -110    -130    -150    -170    -190    -210  
f1 (ppm)

7.689  
7.673  
7.511  
7.495

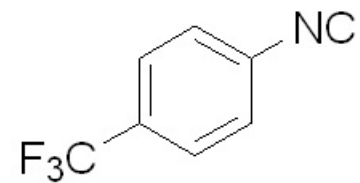

**1g**

<sup>1</sup>H NMR (500 MHz, CDCl<sub>3</sub>)

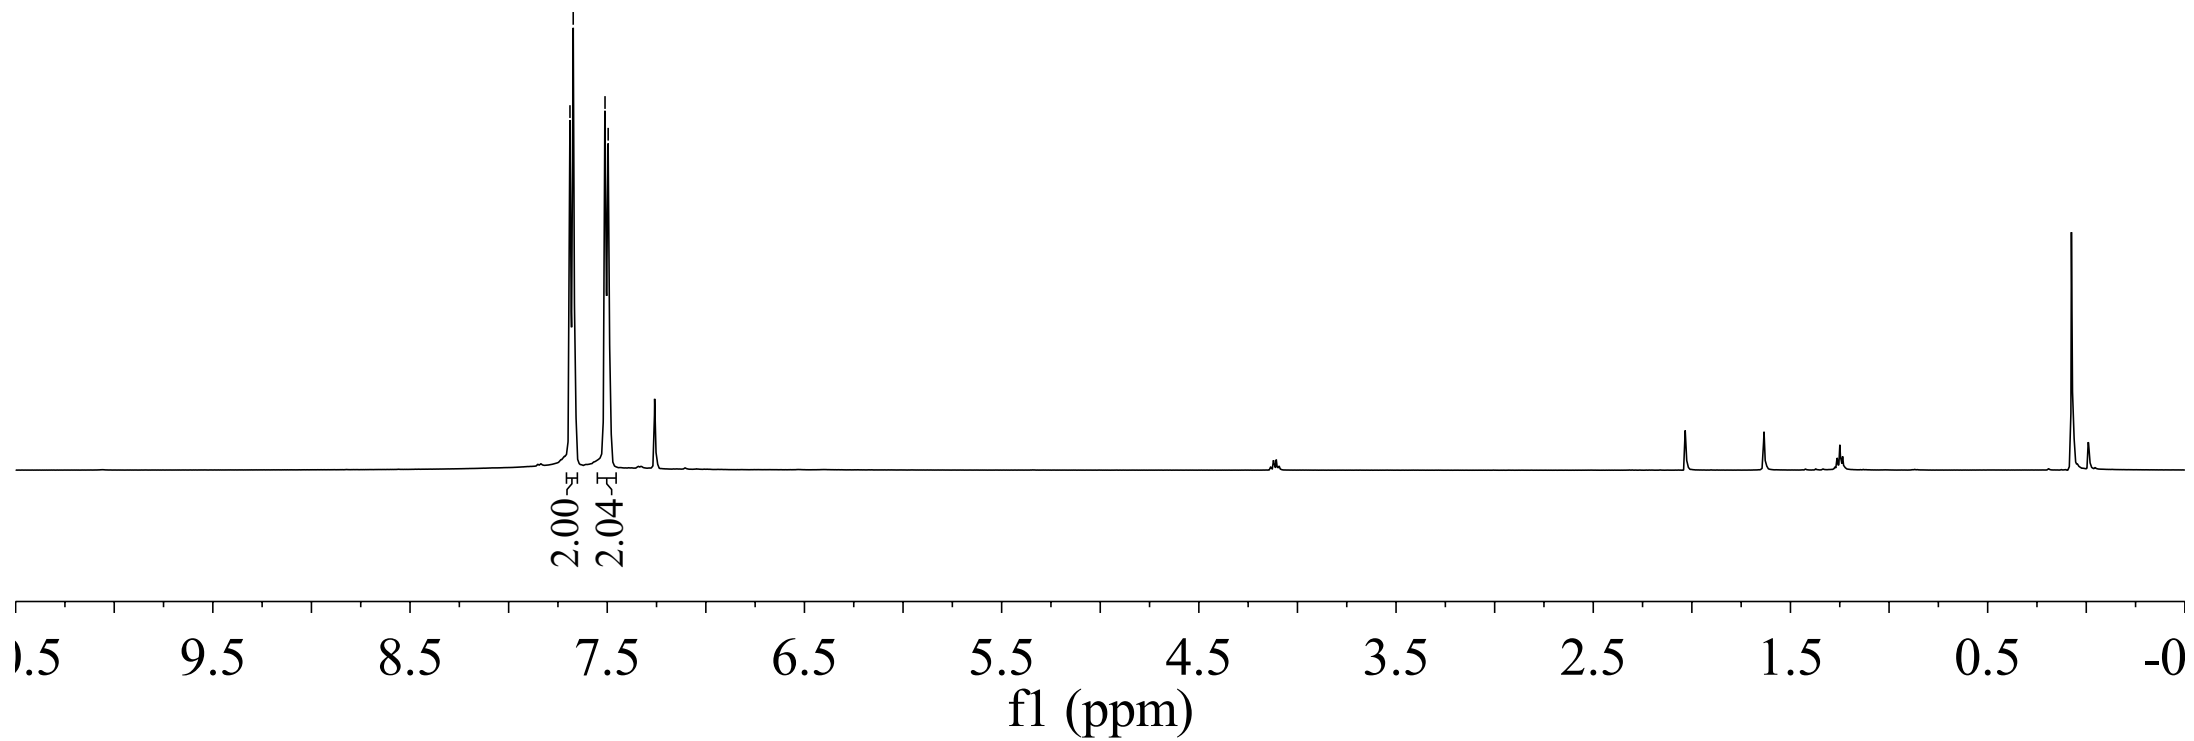

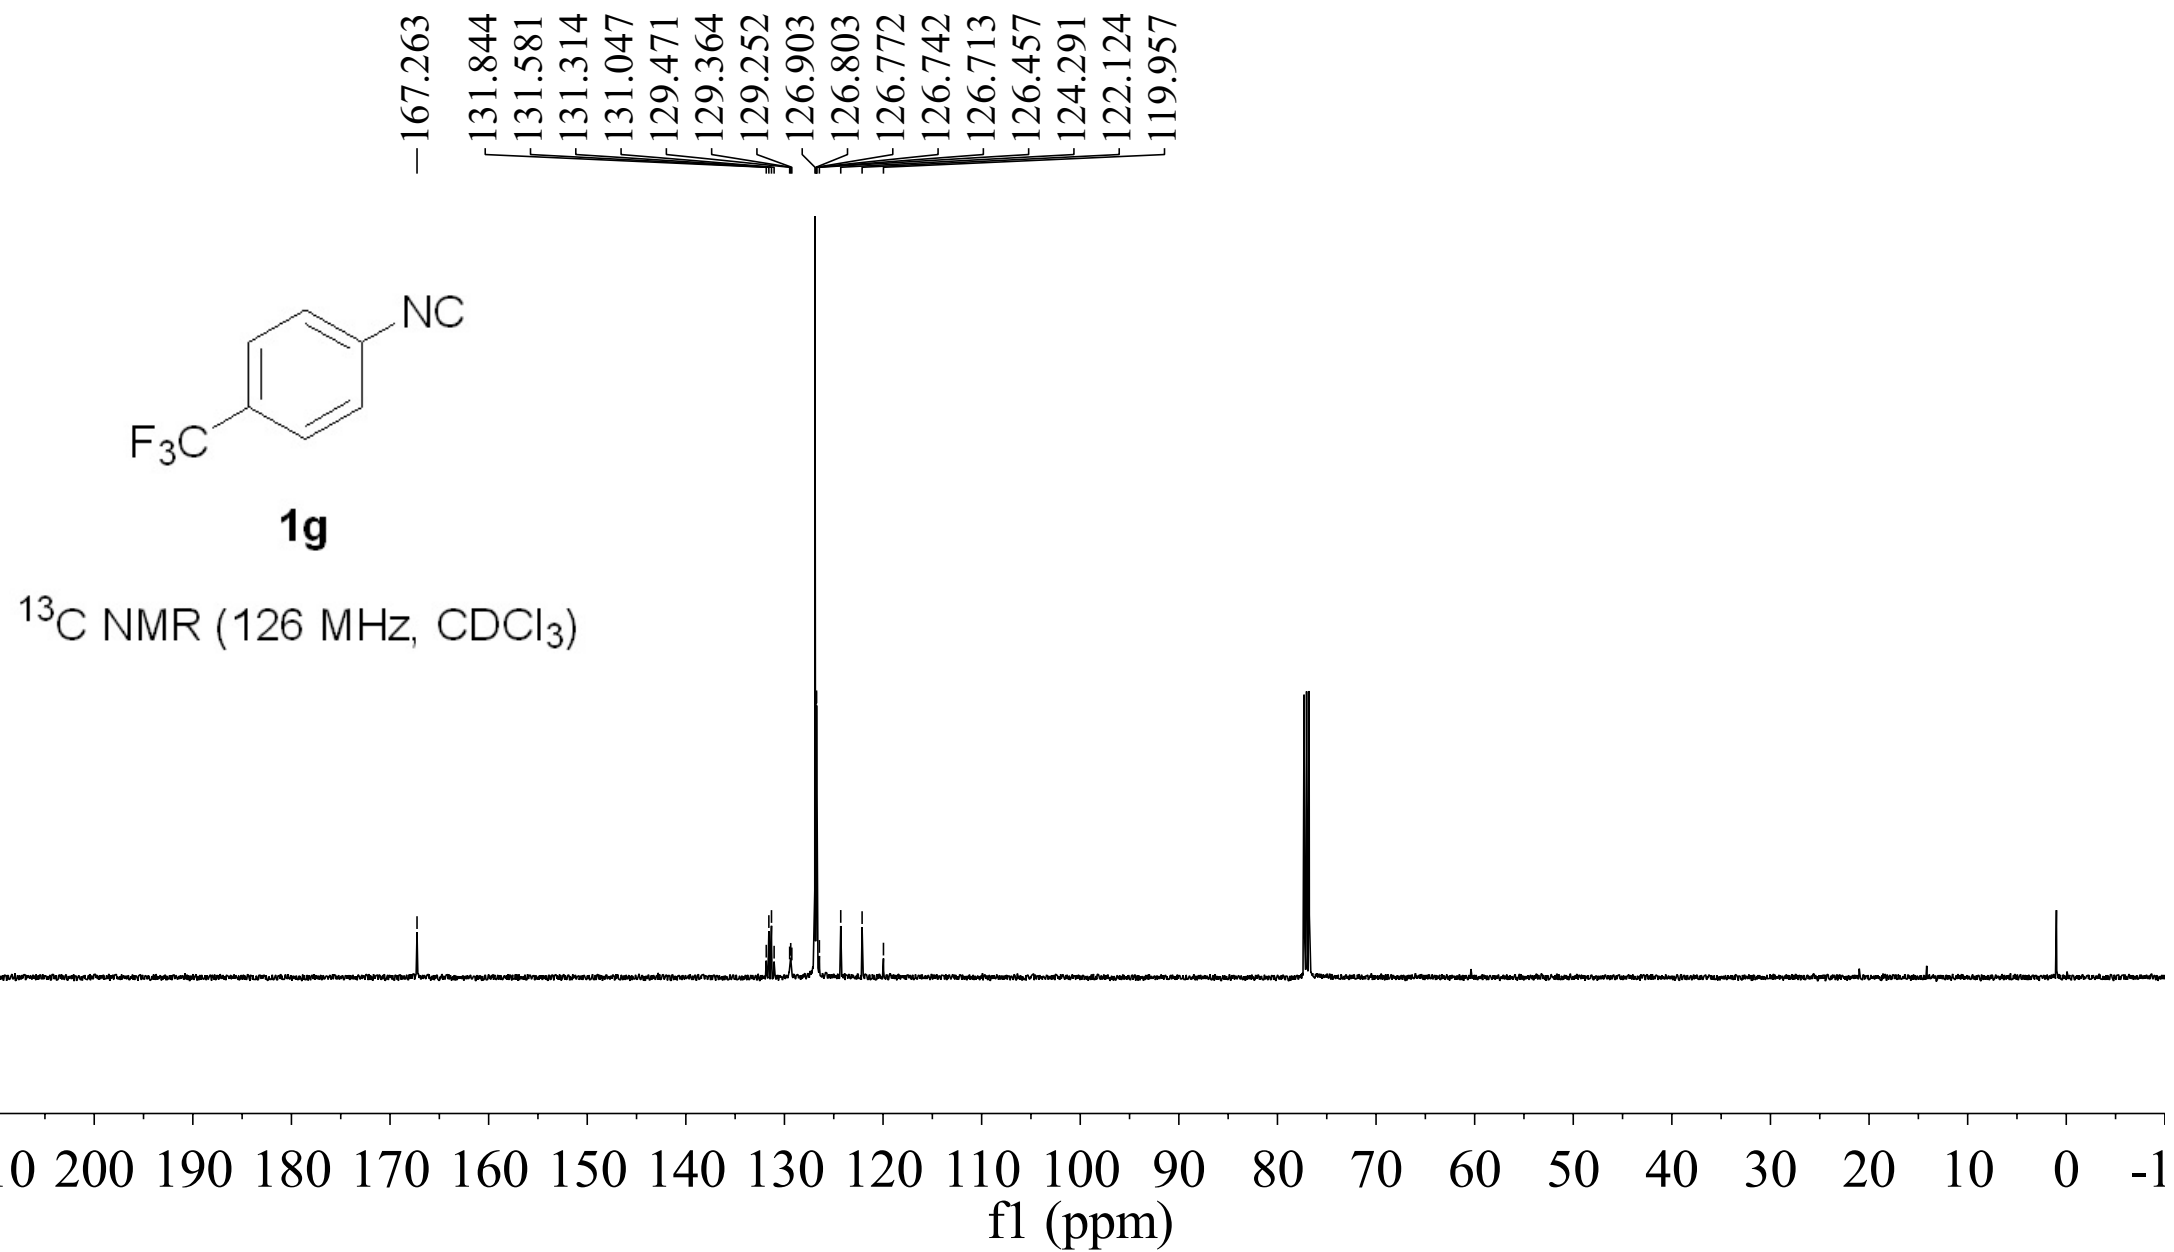

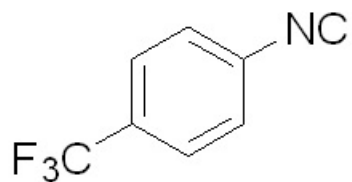

**1g**

$^{19}\text{F}$  NMR (471 MHz,  $\text{CDCl}_3$ )

-63.044

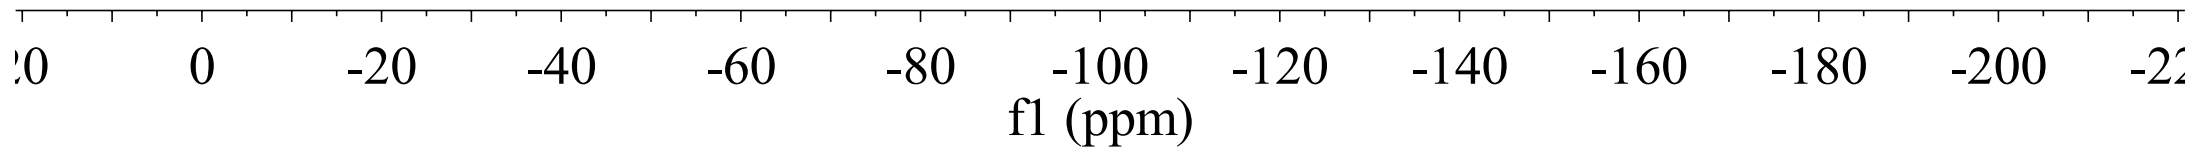

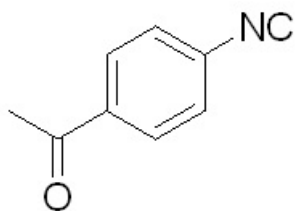

**1h**

<sup>1</sup>H NMR (400 MHz, CDCl<sub>3</sub>)

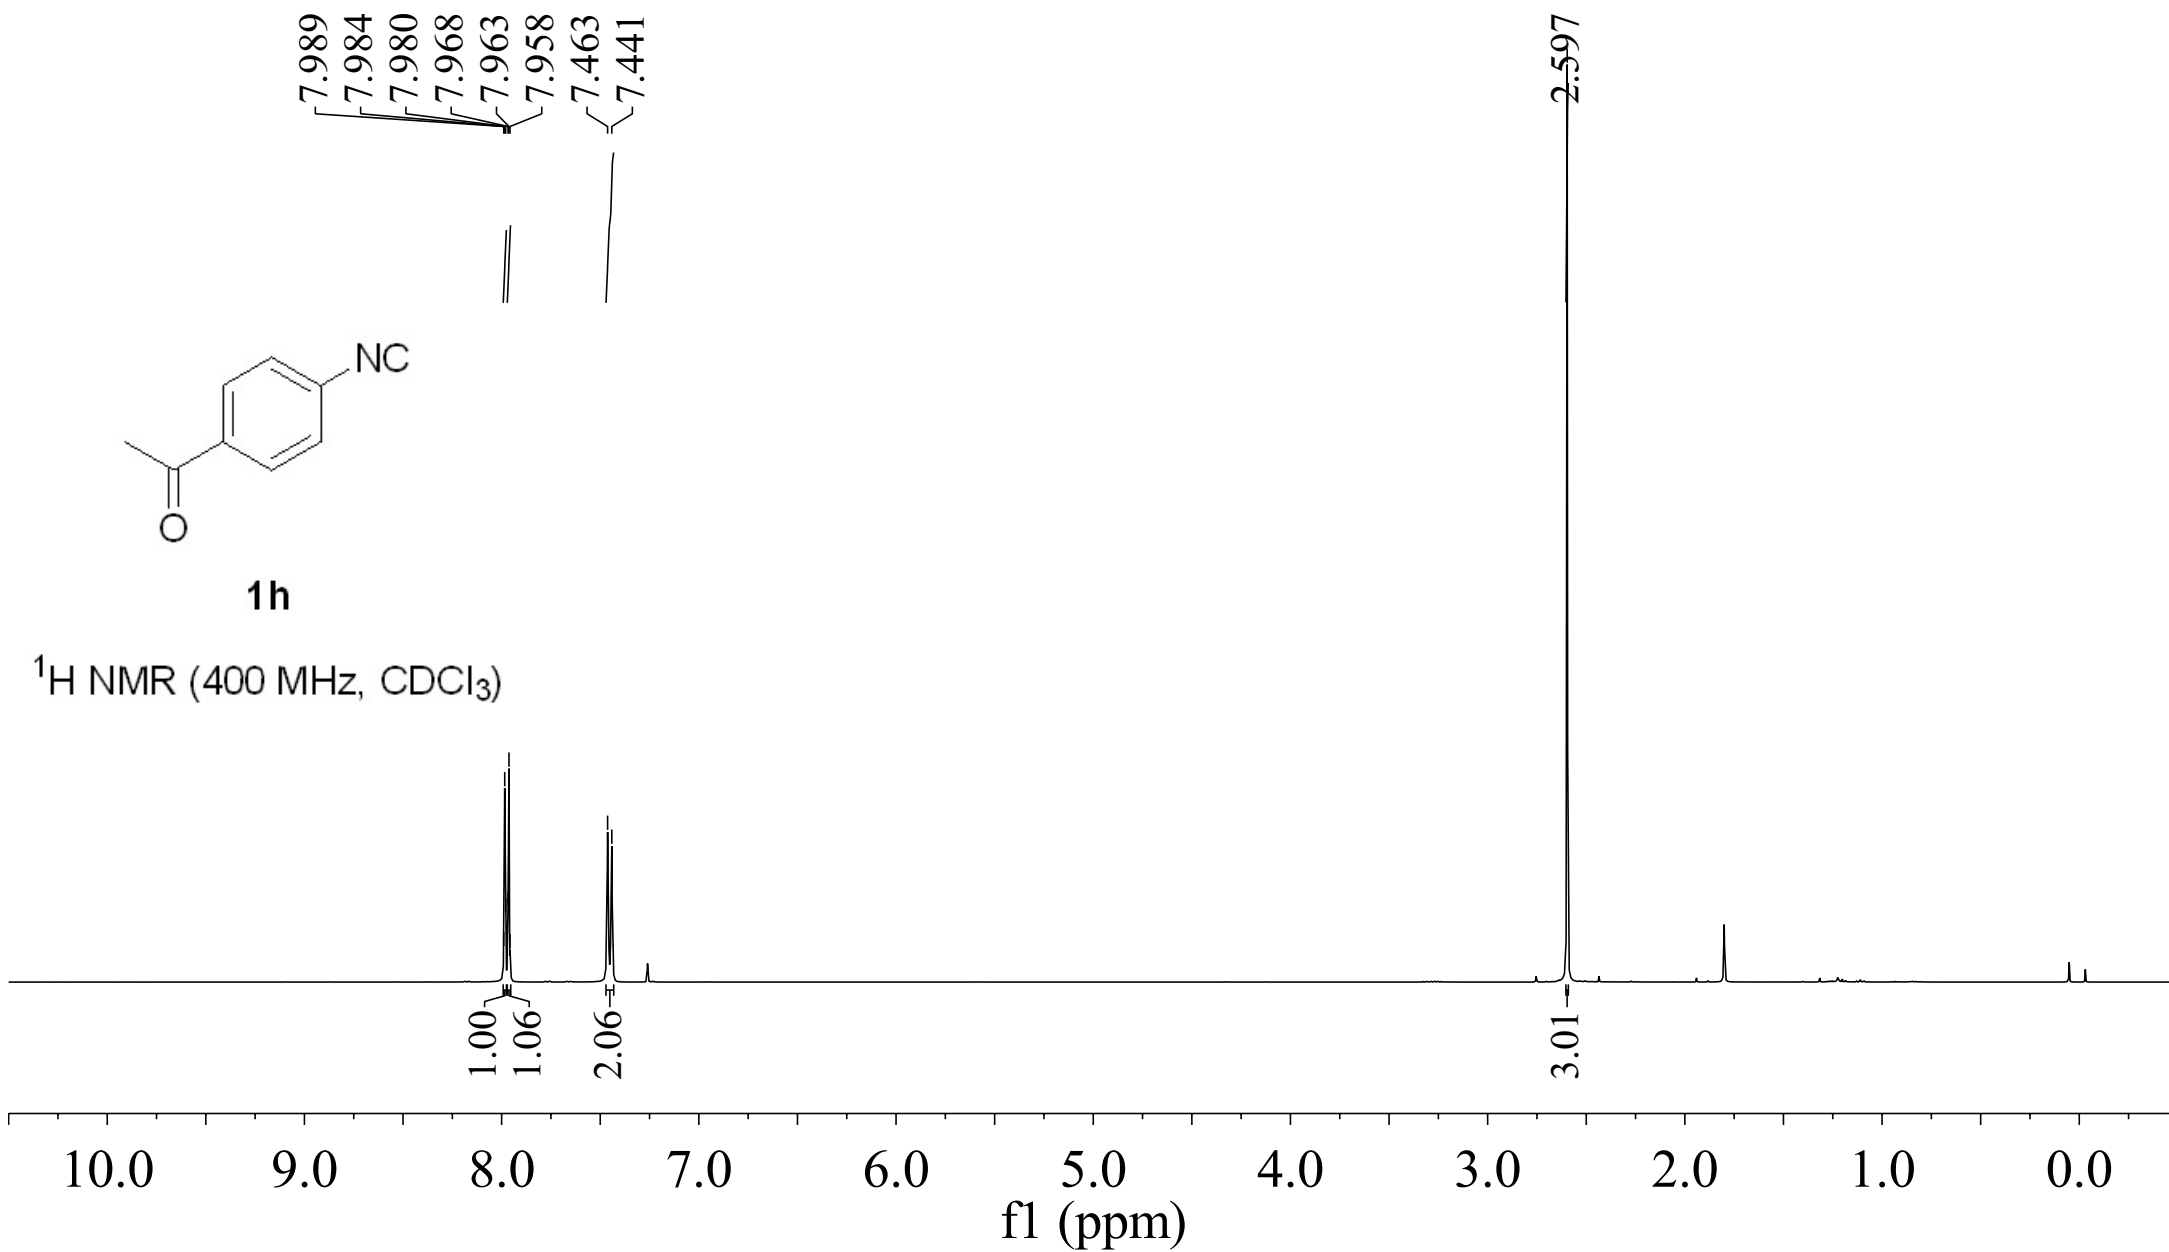



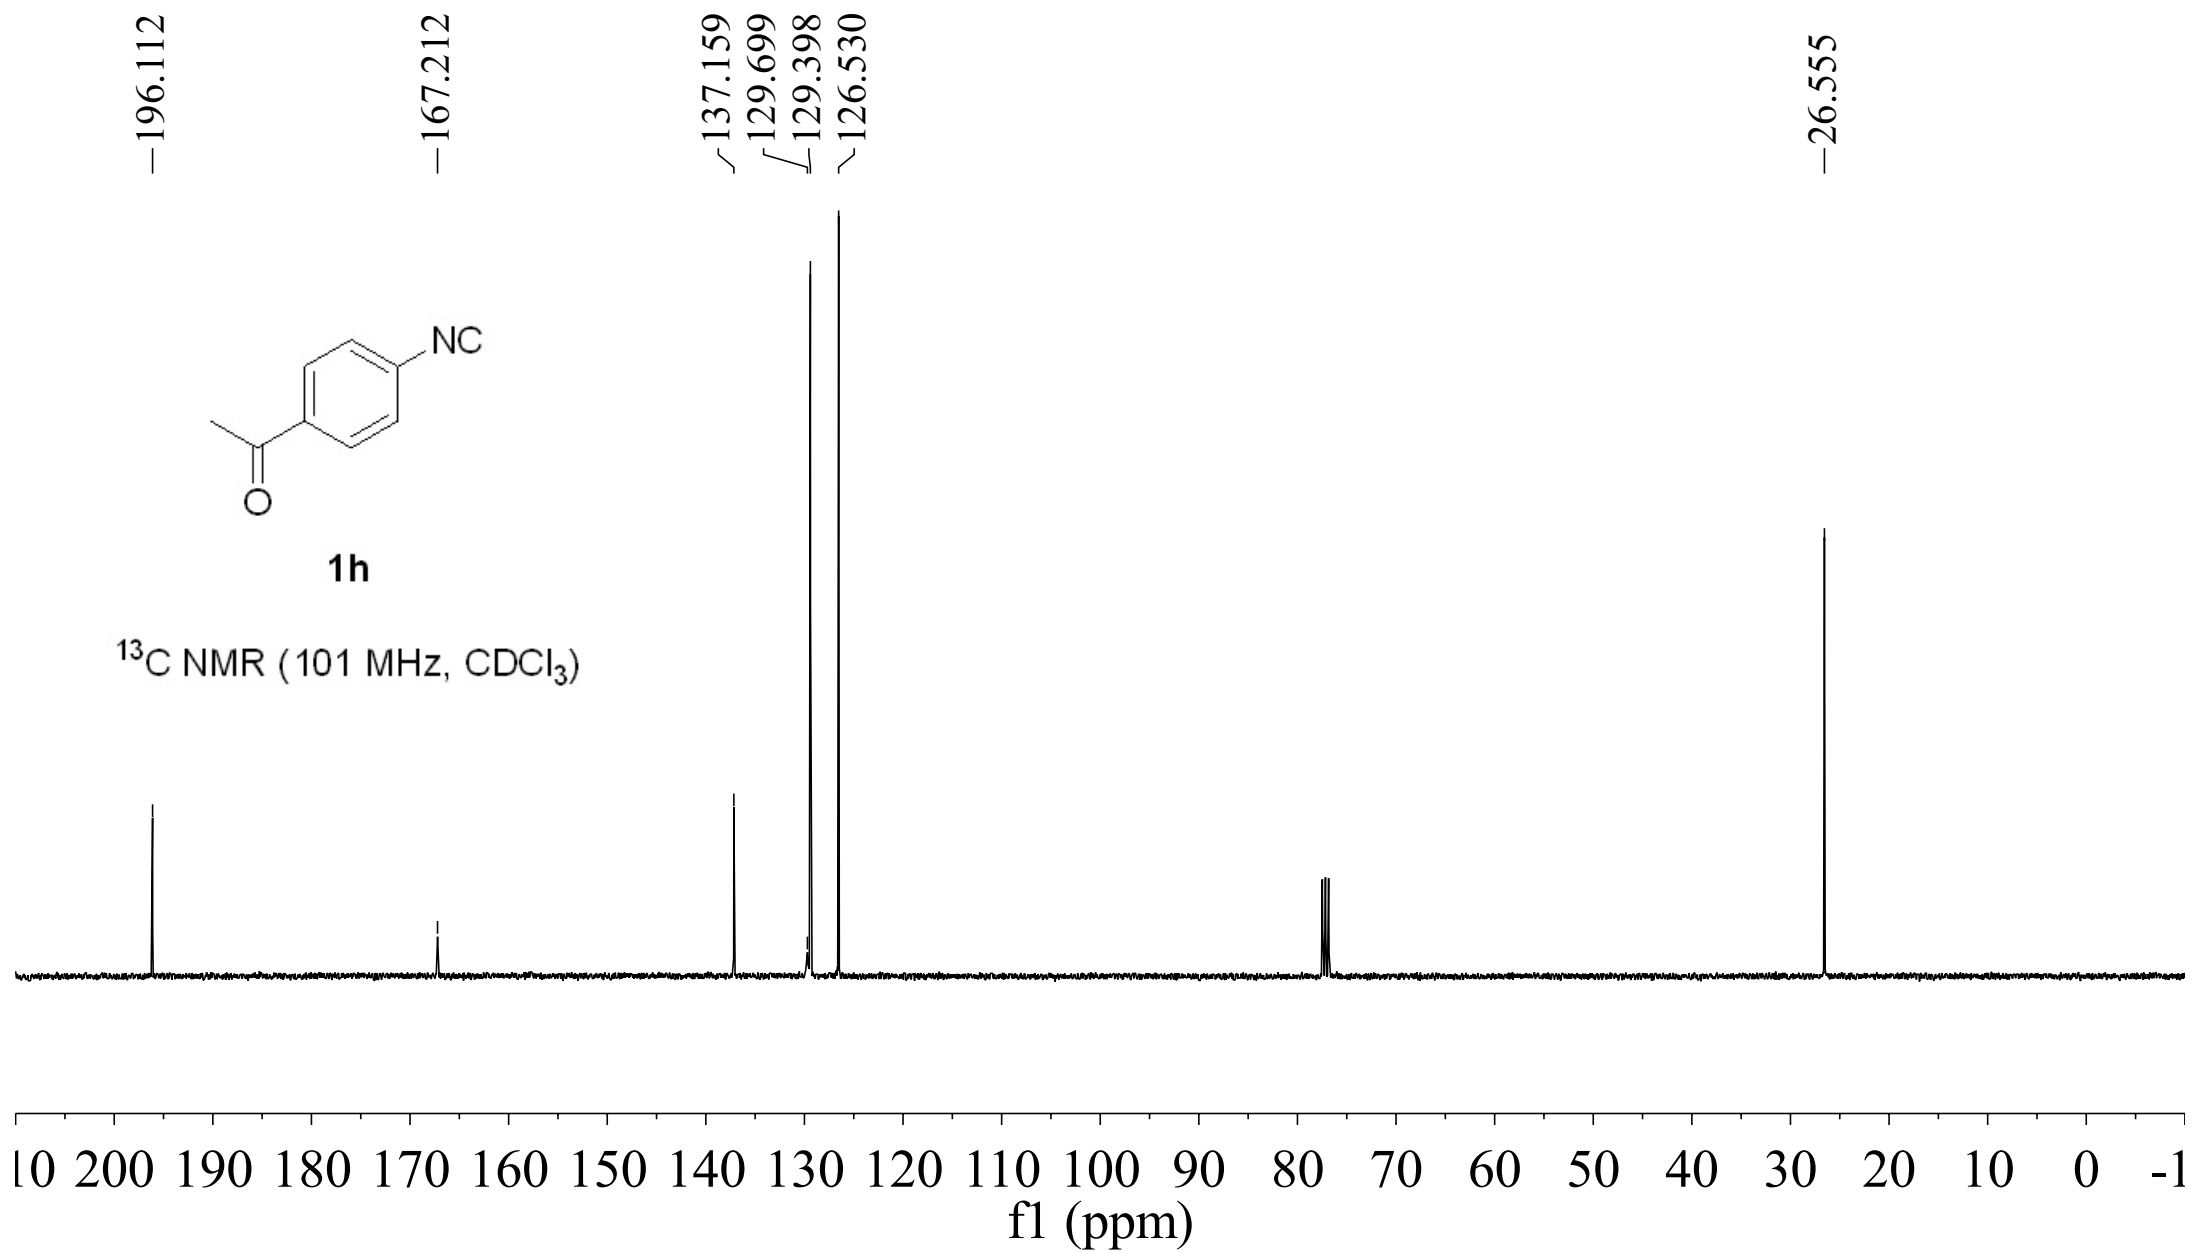

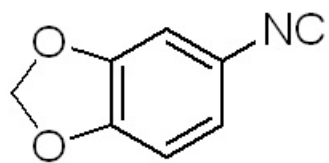

**1i**

$^1\text{H}$  NMR (400 MHz,  $\text{CDCl}_3$ )

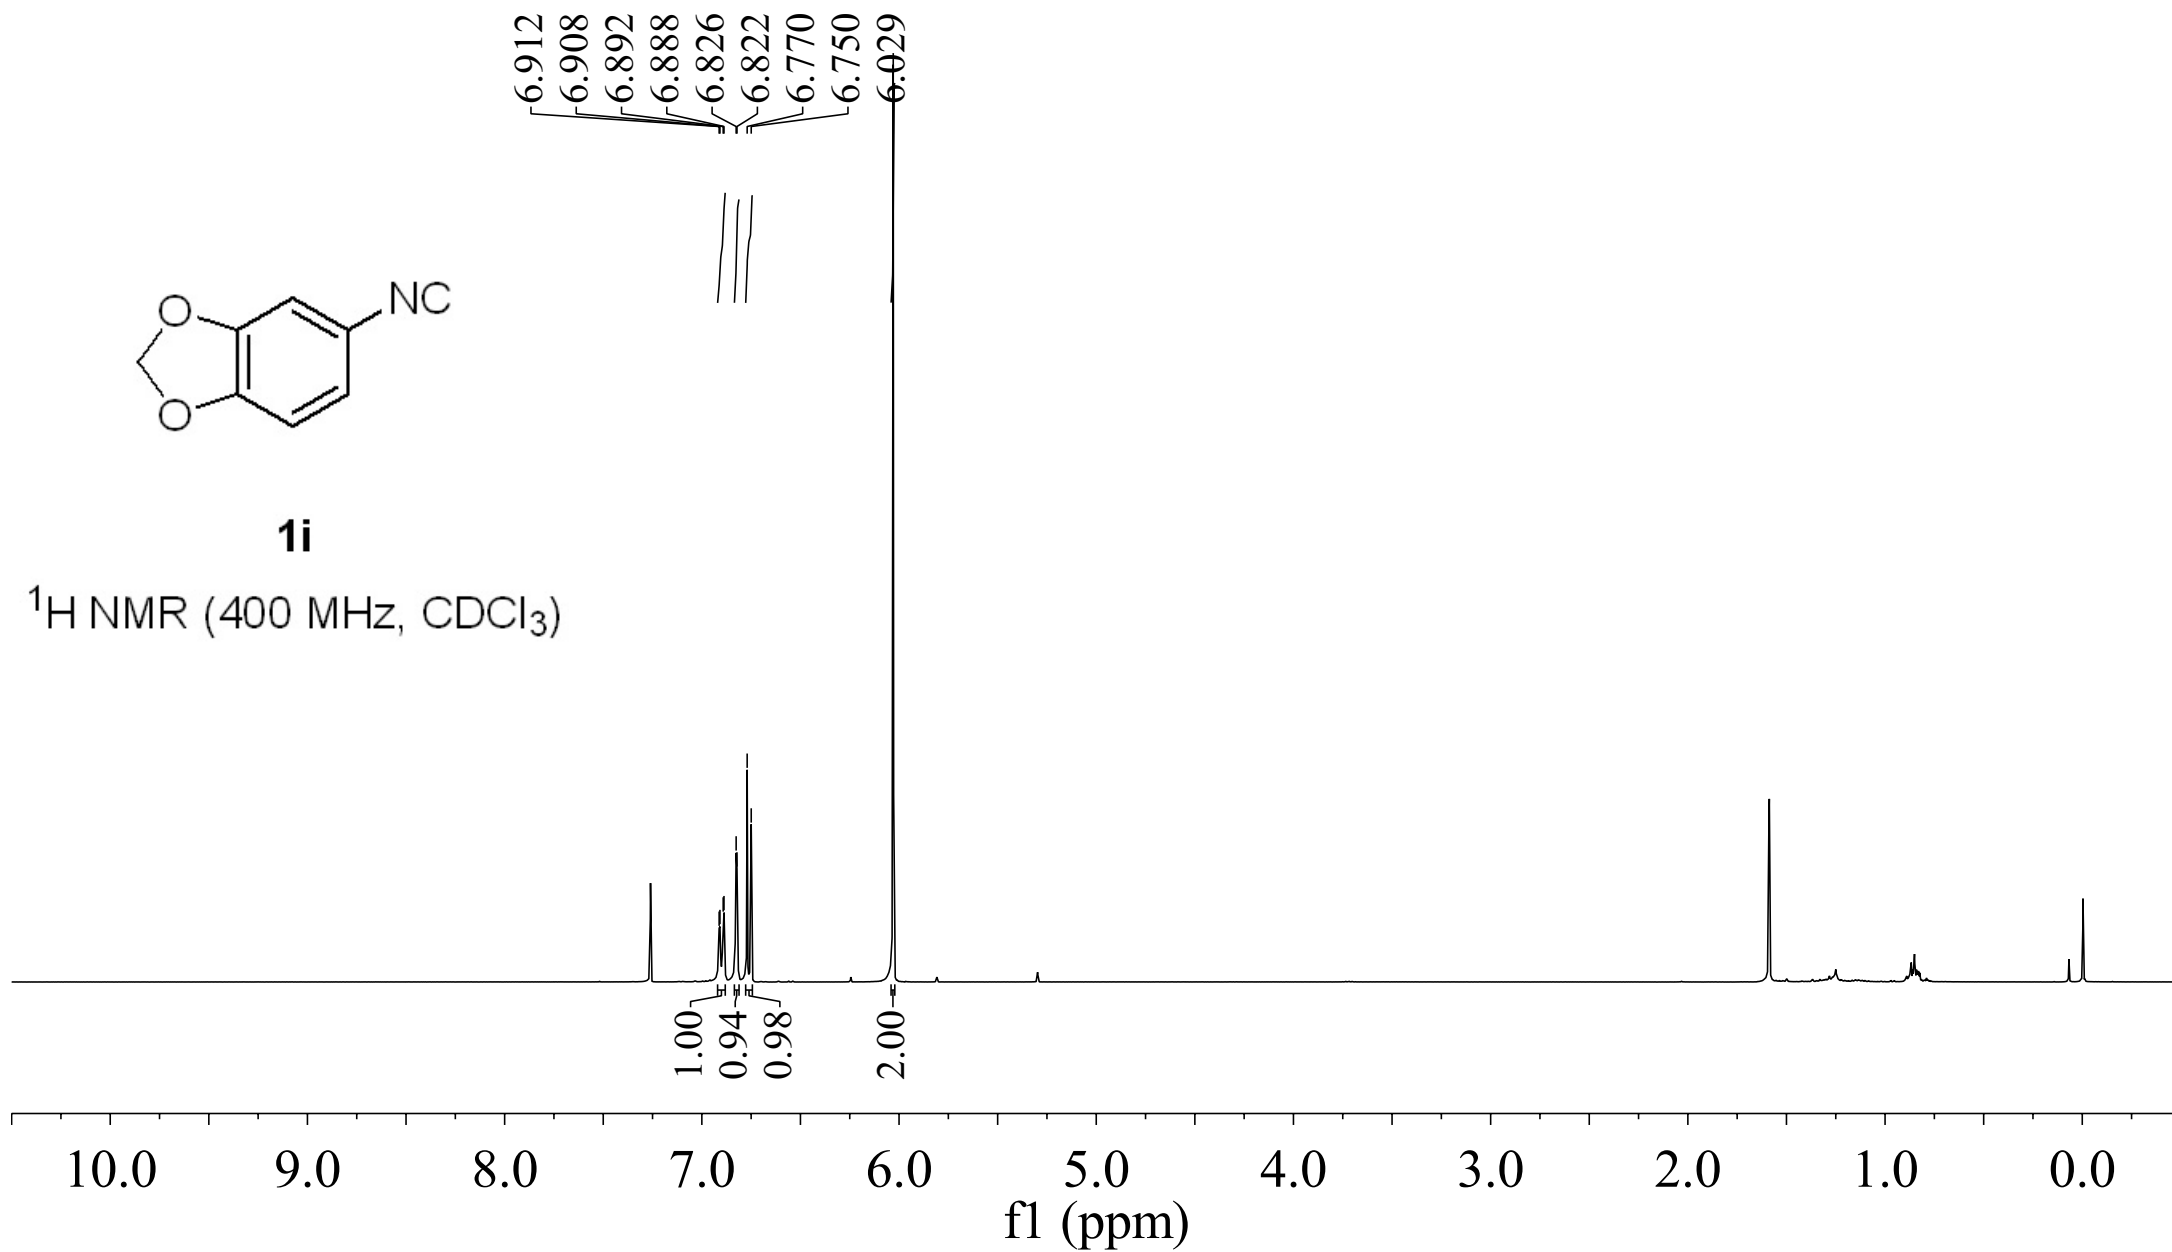

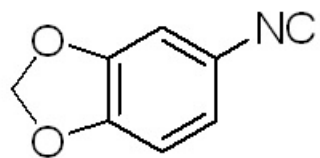

**1i**

$^{13}\text{C}$  NMR (101 MHz,  $\text{CDCl}_3$ )

—162.675

148.461

148.072

120.949

120.415

120.282

120.149

108.483

107.282

102.289

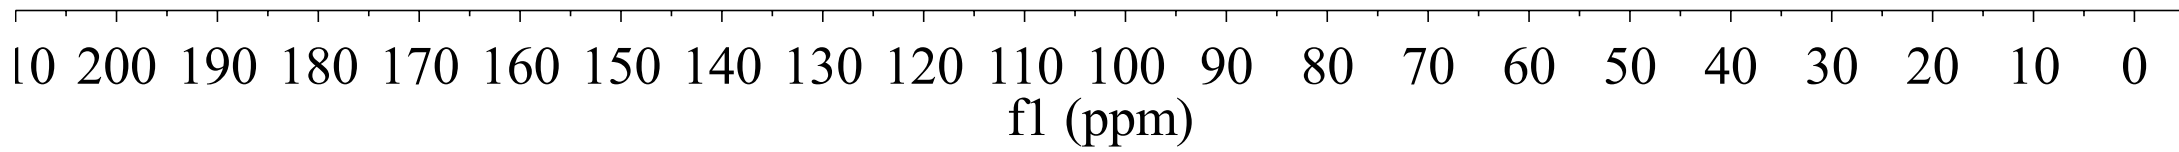

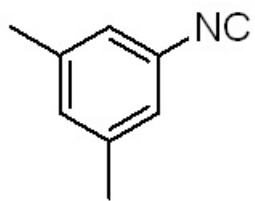

1j

$^1\text{H}$  NMR (400 MHz,  $\text{CDCl}_3$ )

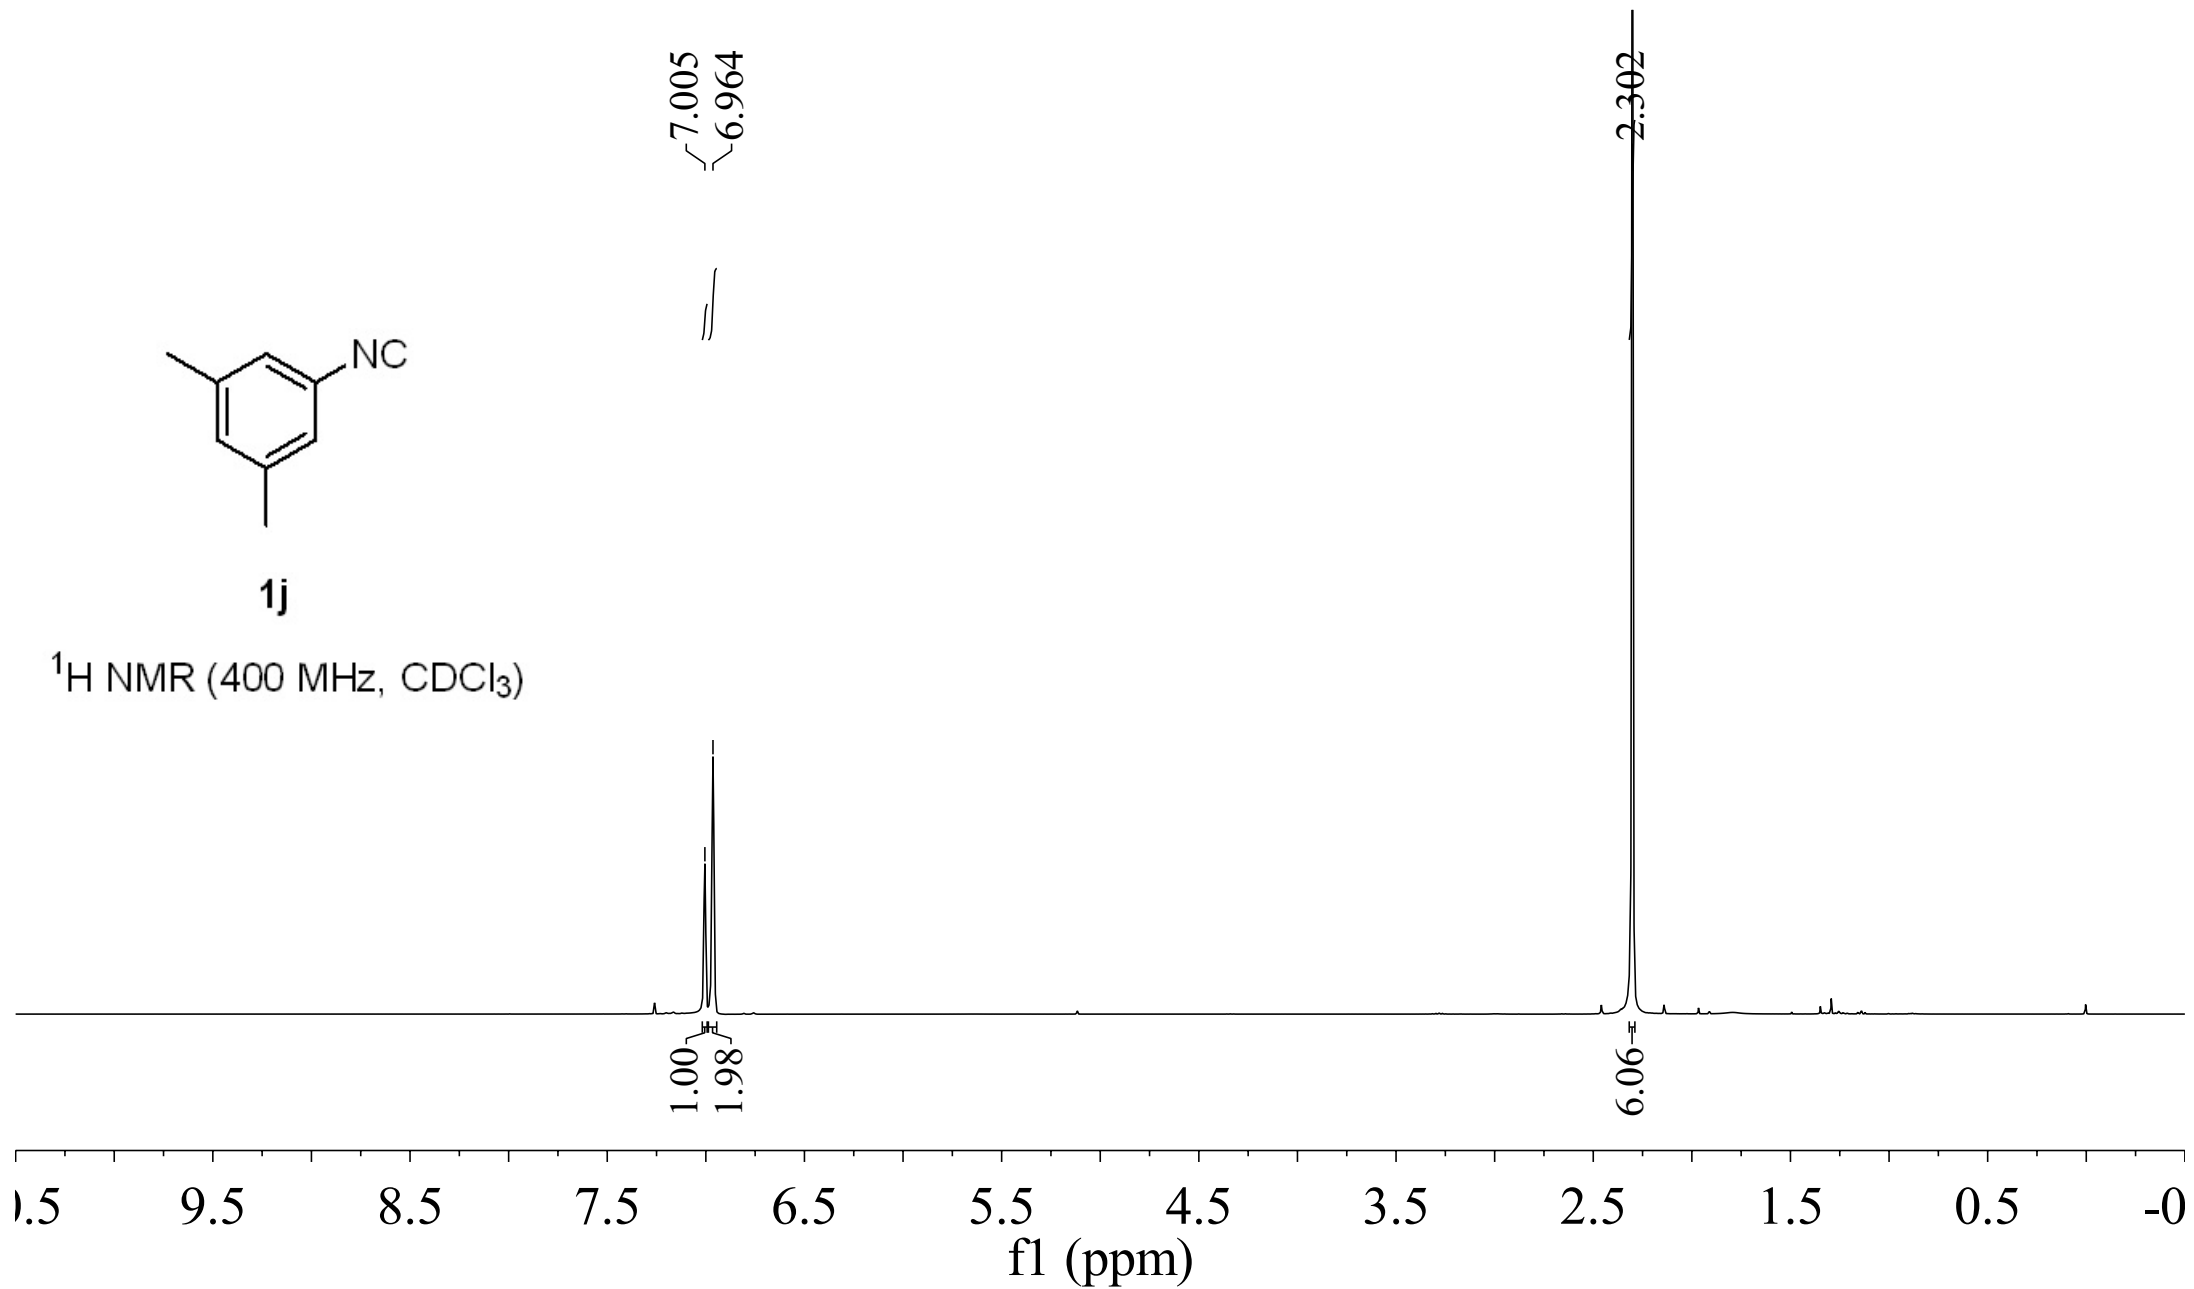

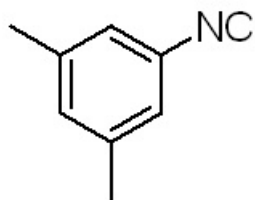

**1j**

$^{13}\text{C}$  NMR (101 MHz,  $\text{CDCl}_3$ )

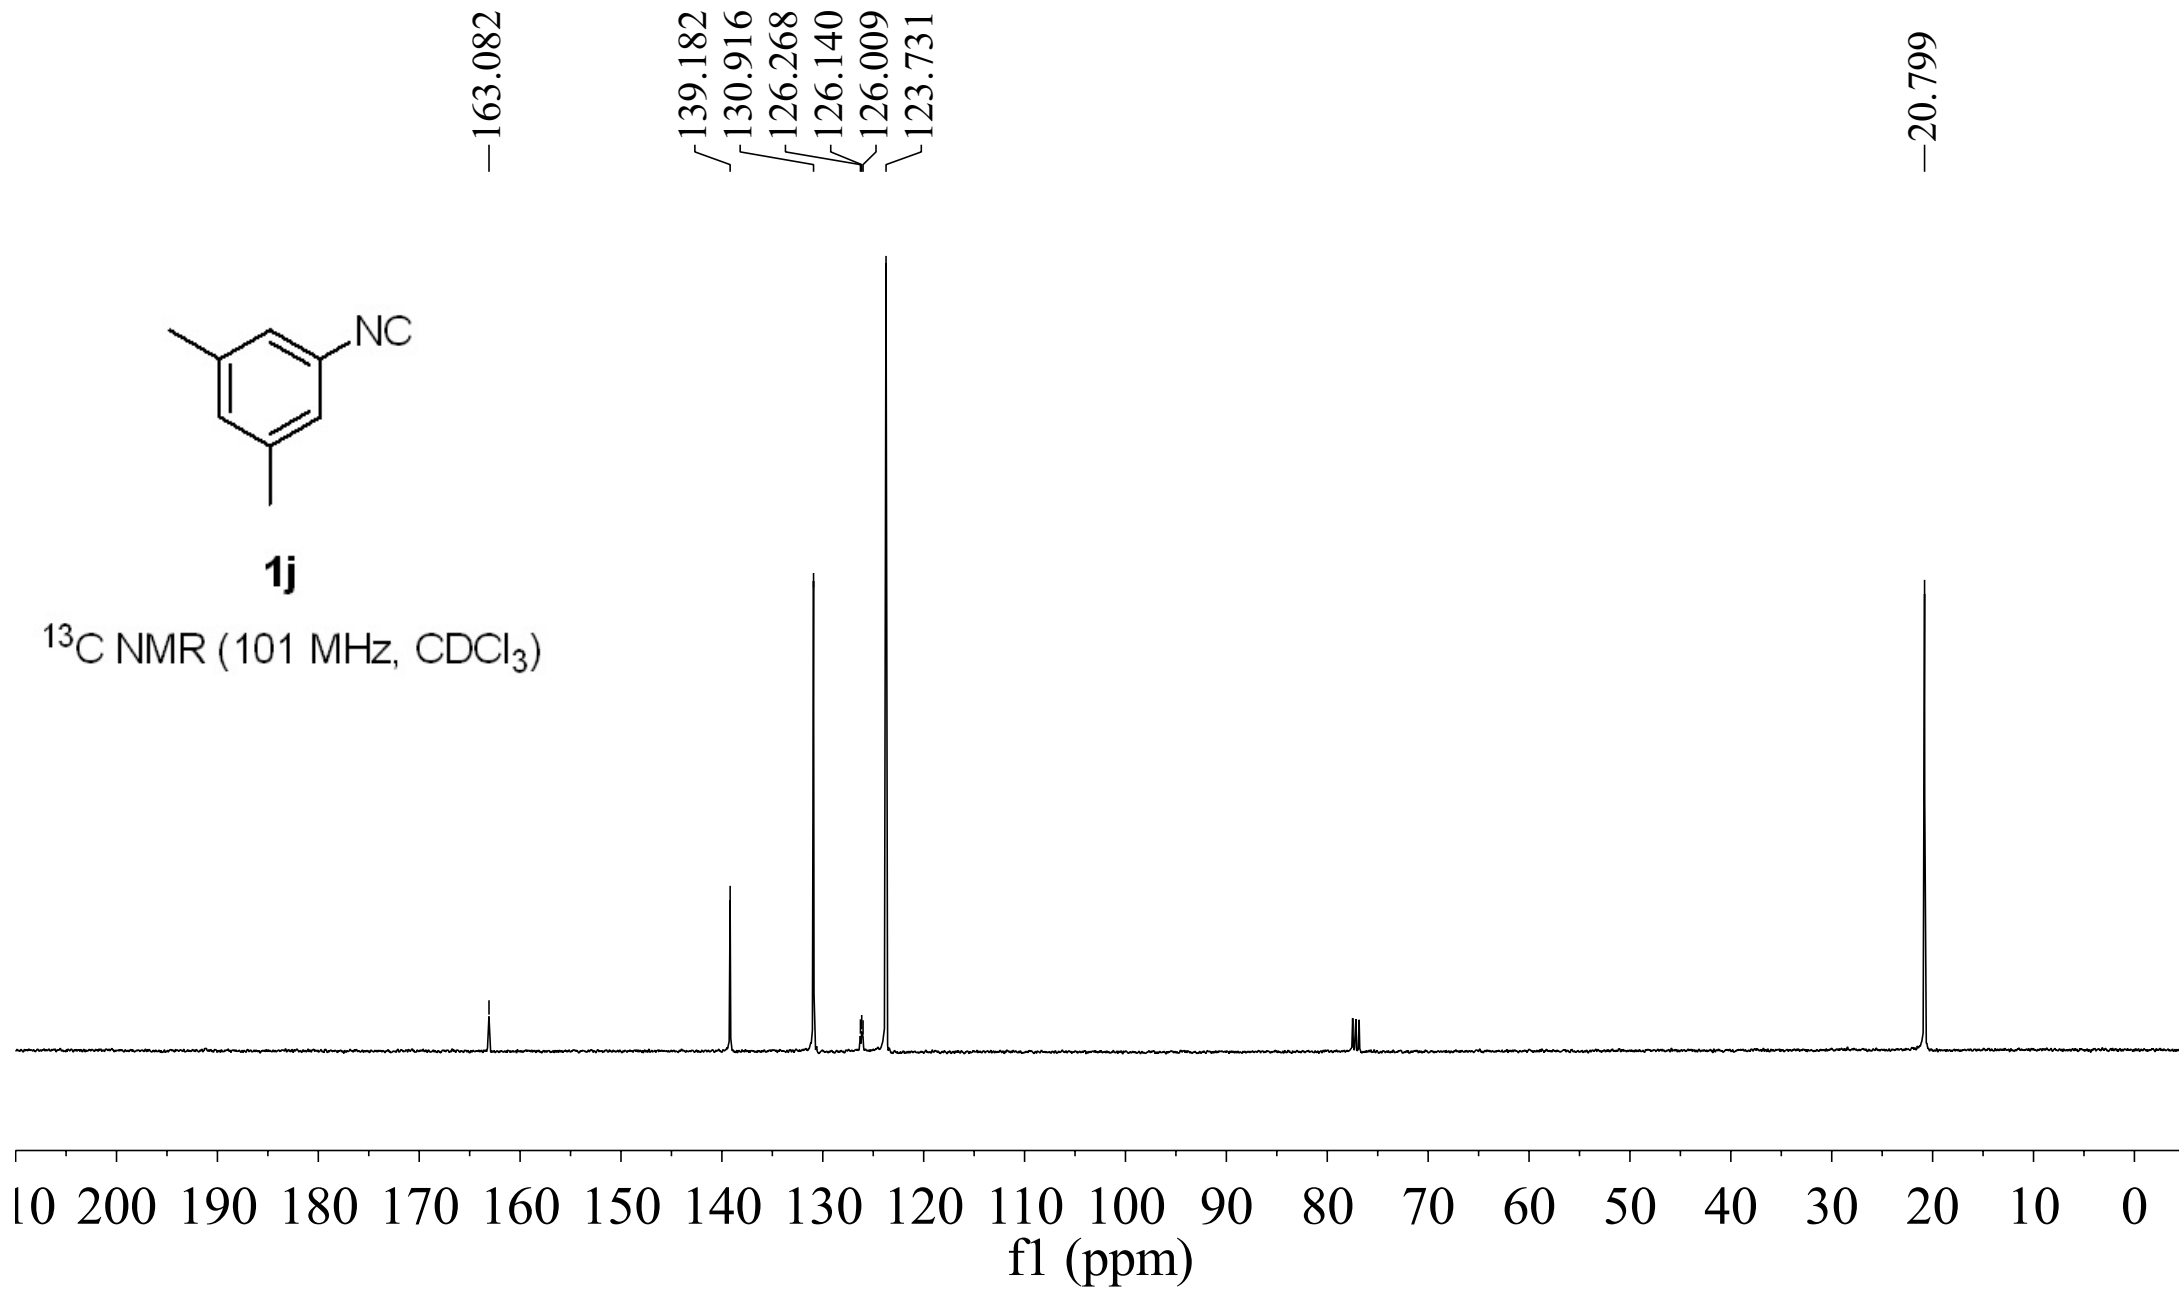

8.173  
8.152  
7.883  
7.863  
7.860  
7.666  
7.649  
7.631  
7.628  
7.604  
7.602  
7.584  
7.567  
7.550  
7.435  
7.415  
7.395

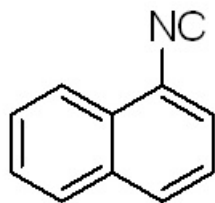

**1k**

<sup>1</sup>H NMR (400 MHz, CDCl<sub>3</sub>)

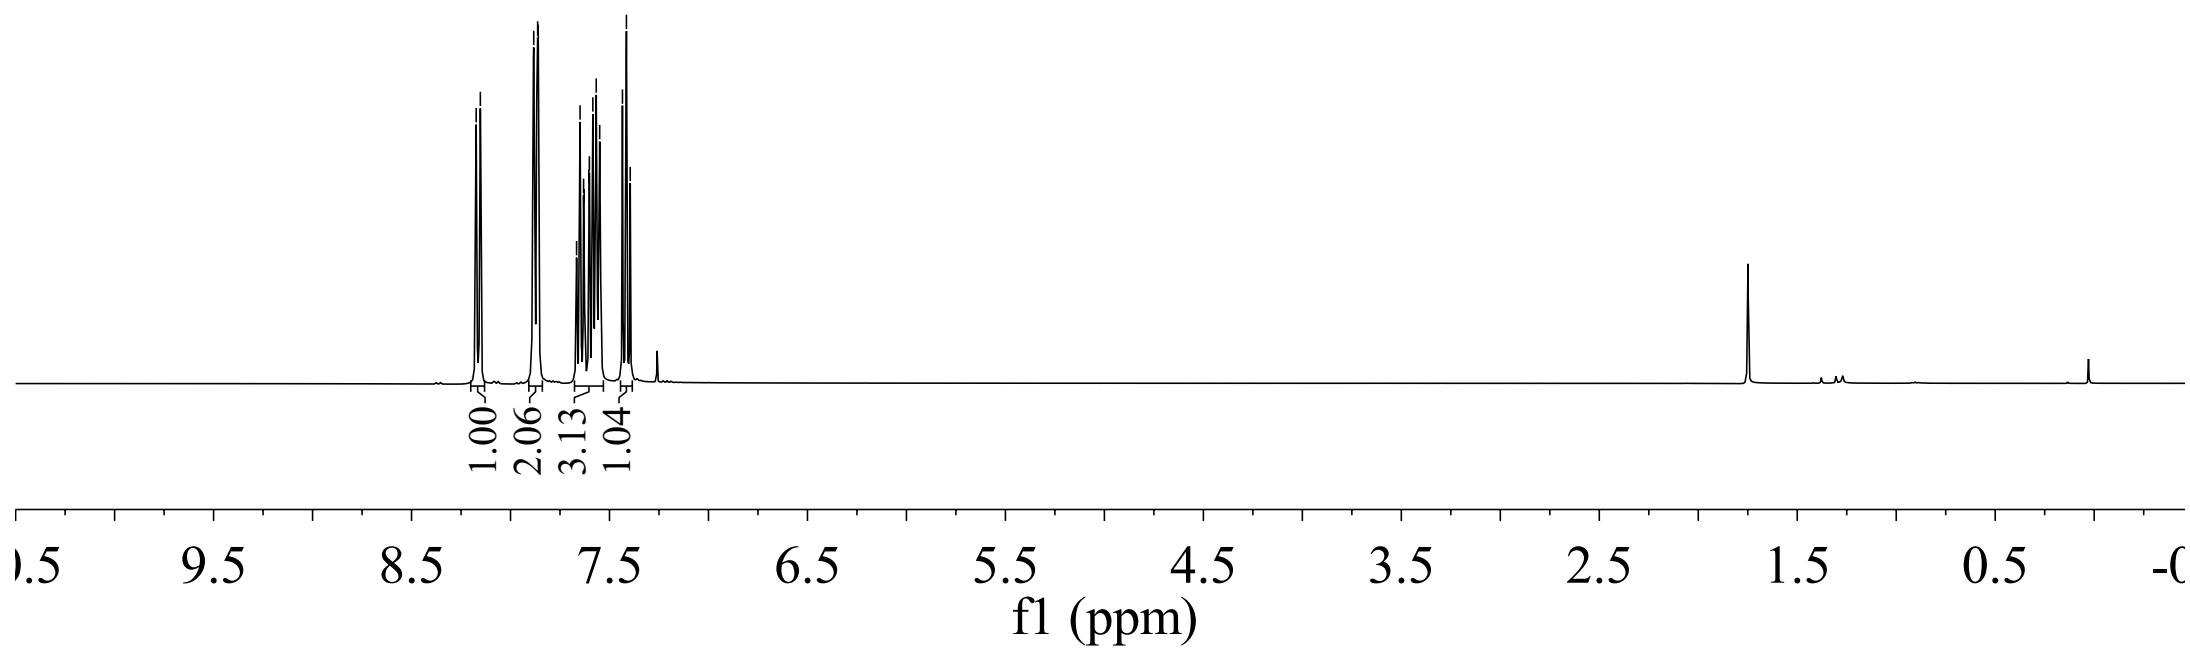

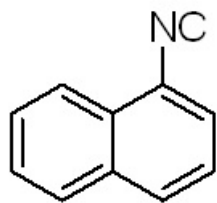

**1k**

$^{13}\text{C}$  NMR (101 MHz,  $\text{CDCl}_3$ )

—167.288

133.115  
129.453  
128.004  
127.638  
127.501  
127.065  
124.553  
124.147  
123.195  
123.064  
122.935  
122.420

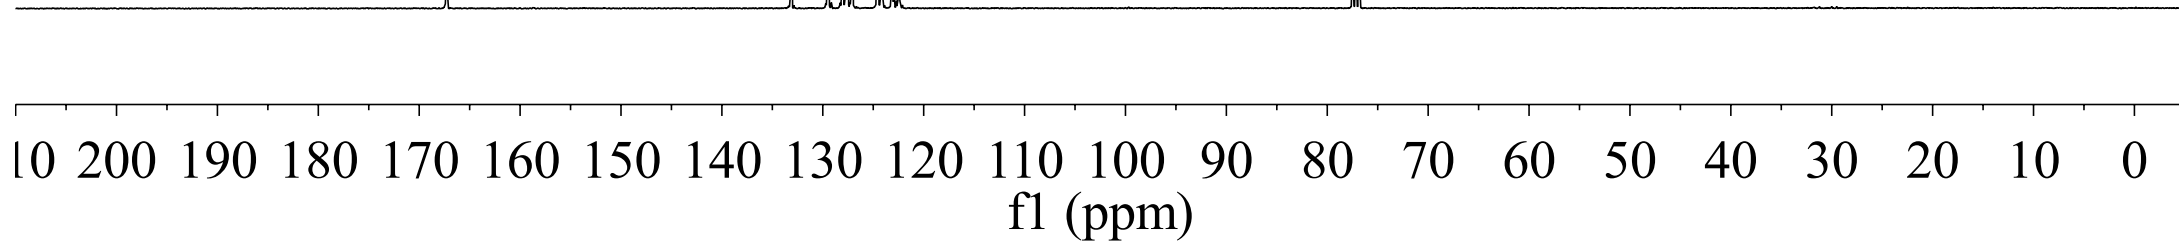

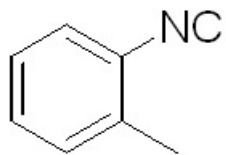

**11**

$^1\text{H}$  NMR (400 MHz,  $\text{CDCl}_3$ )

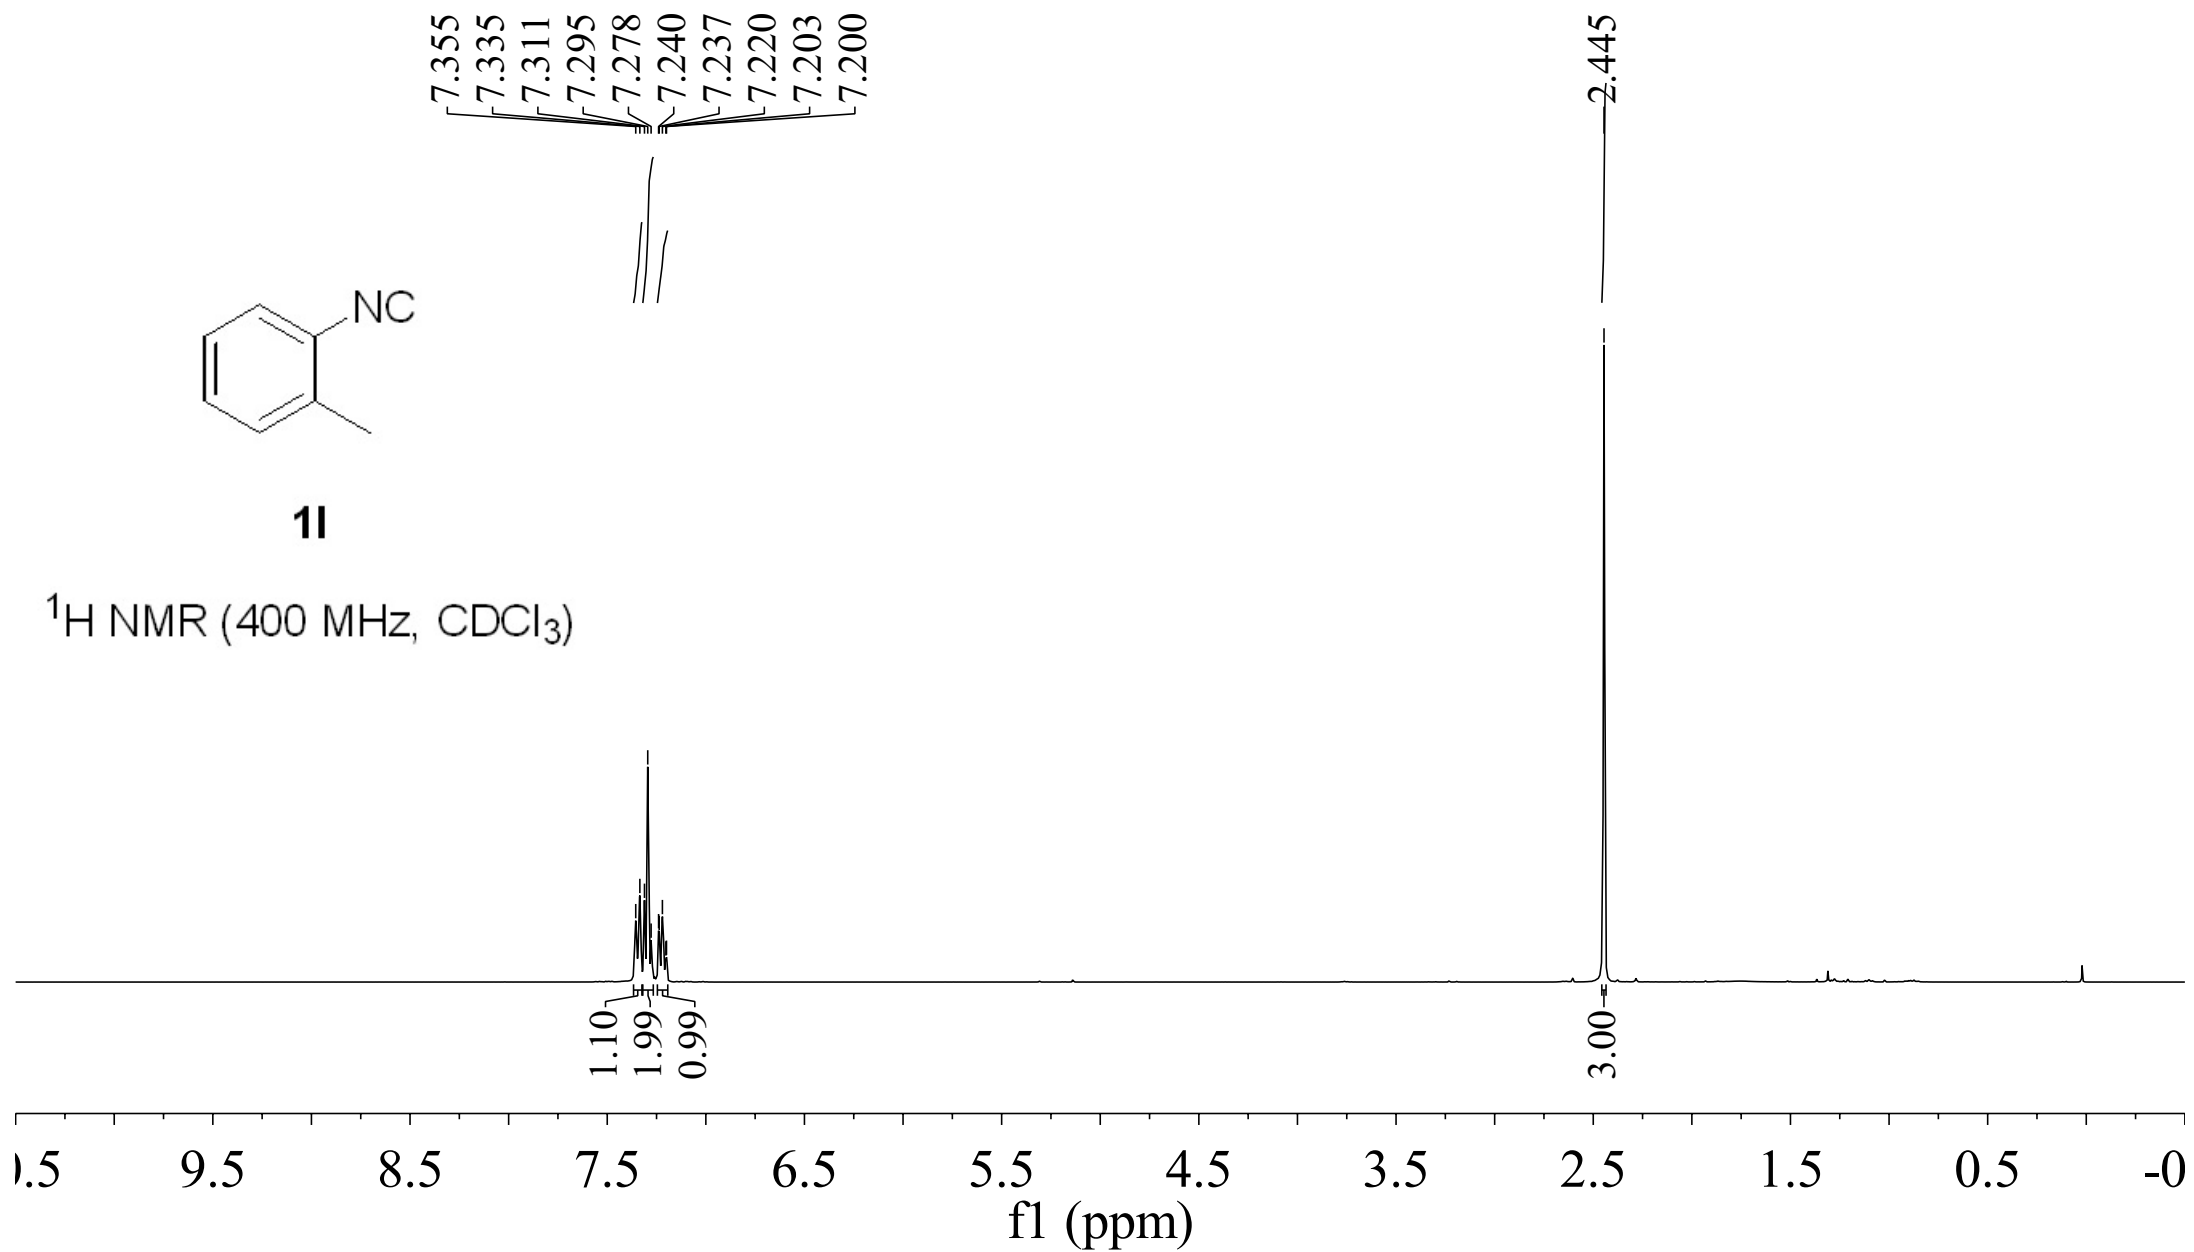



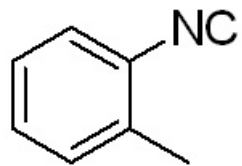

**11**

<sup>13</sup>C NMR (101 MHz, CDCl<sub>3</sub>)

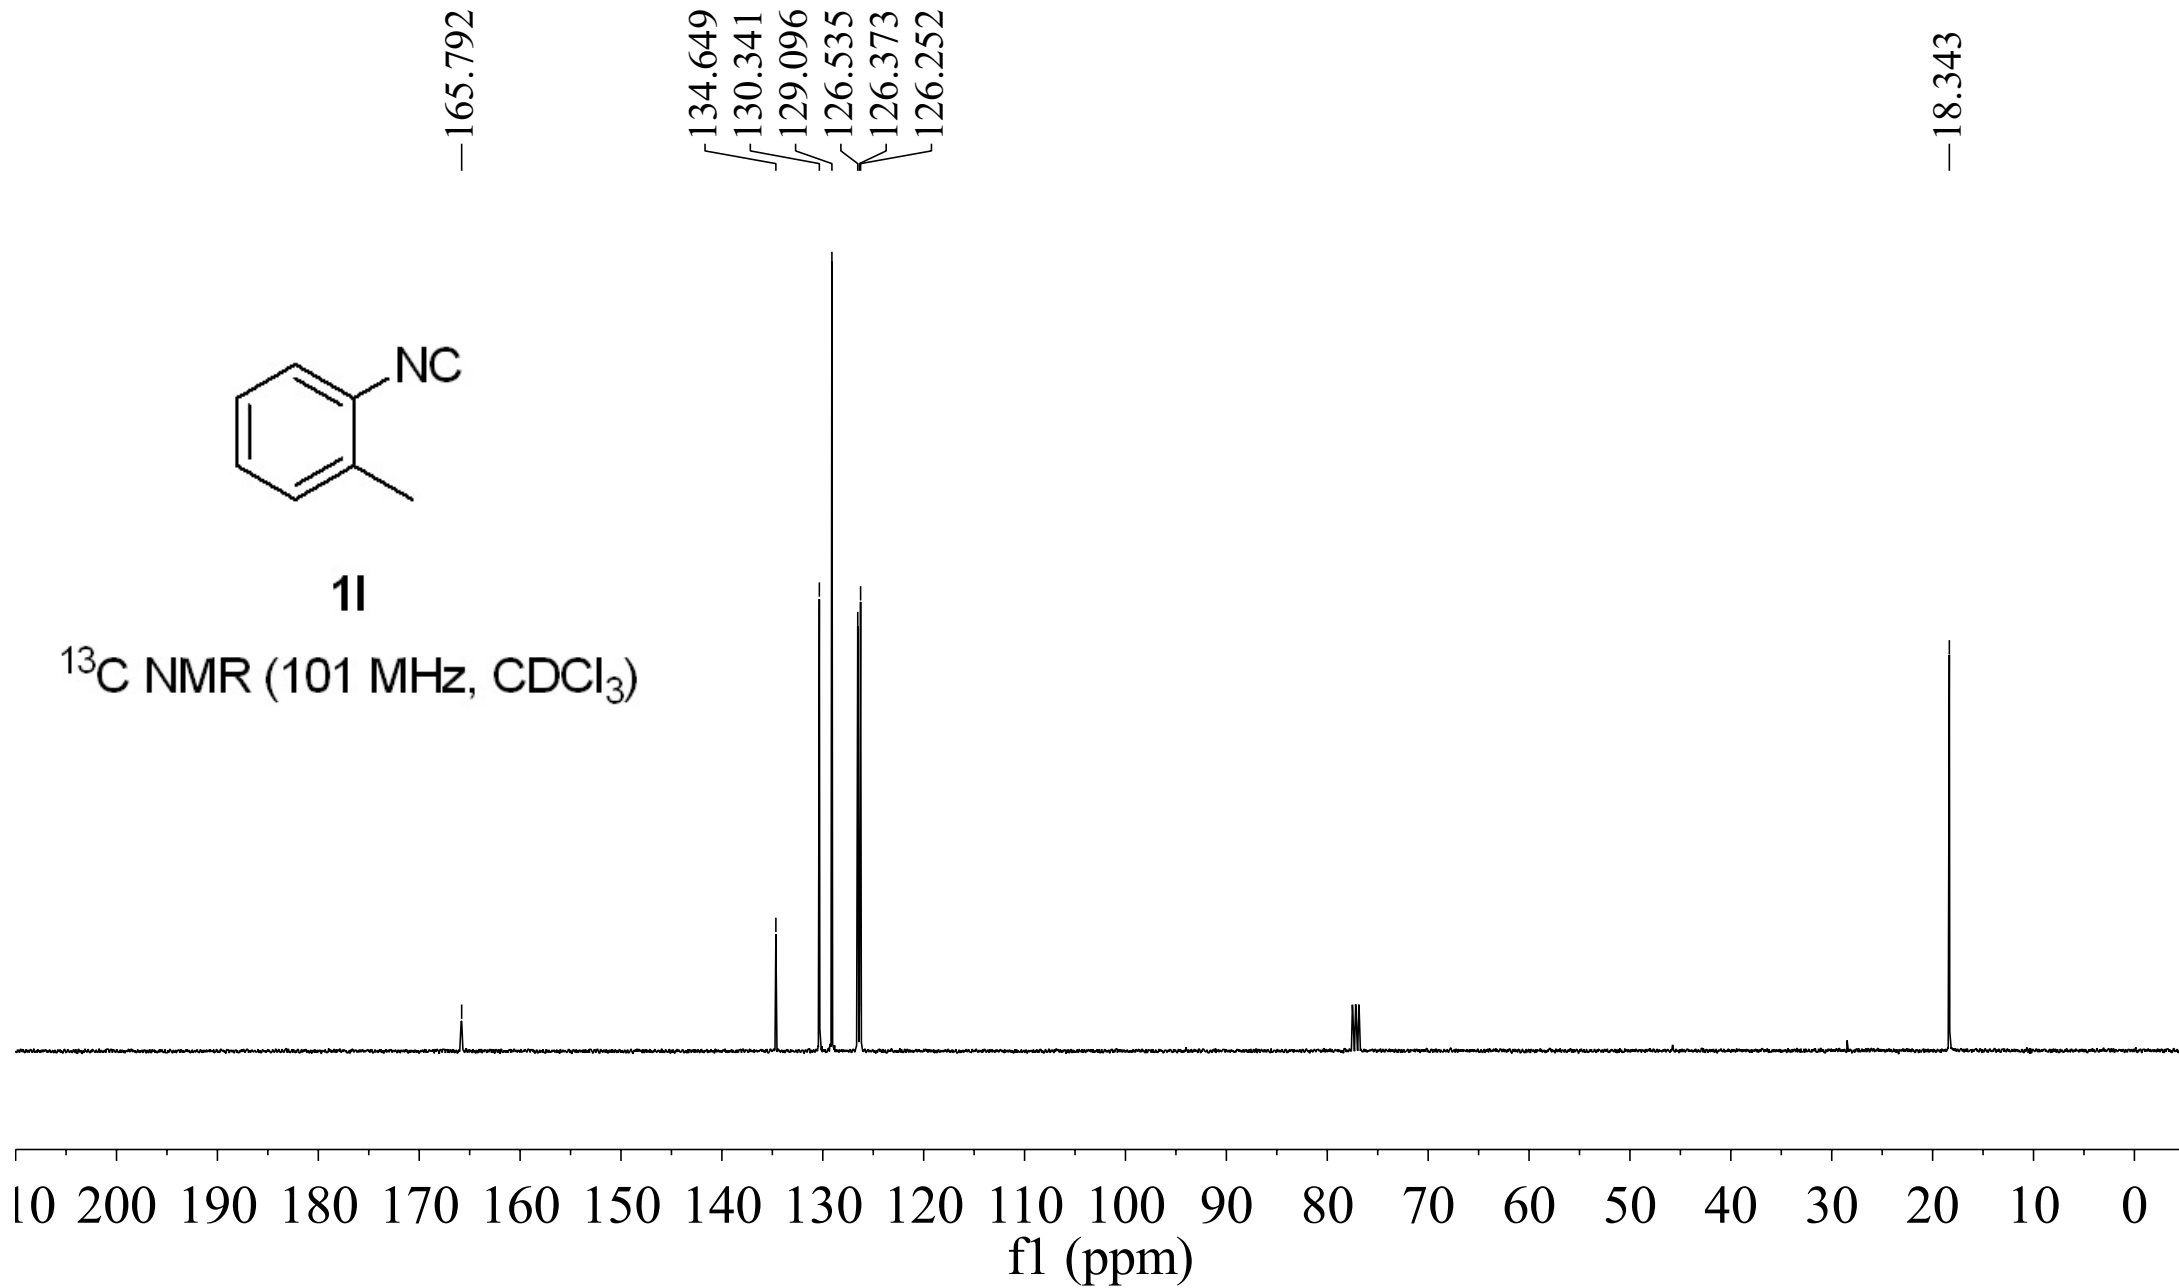

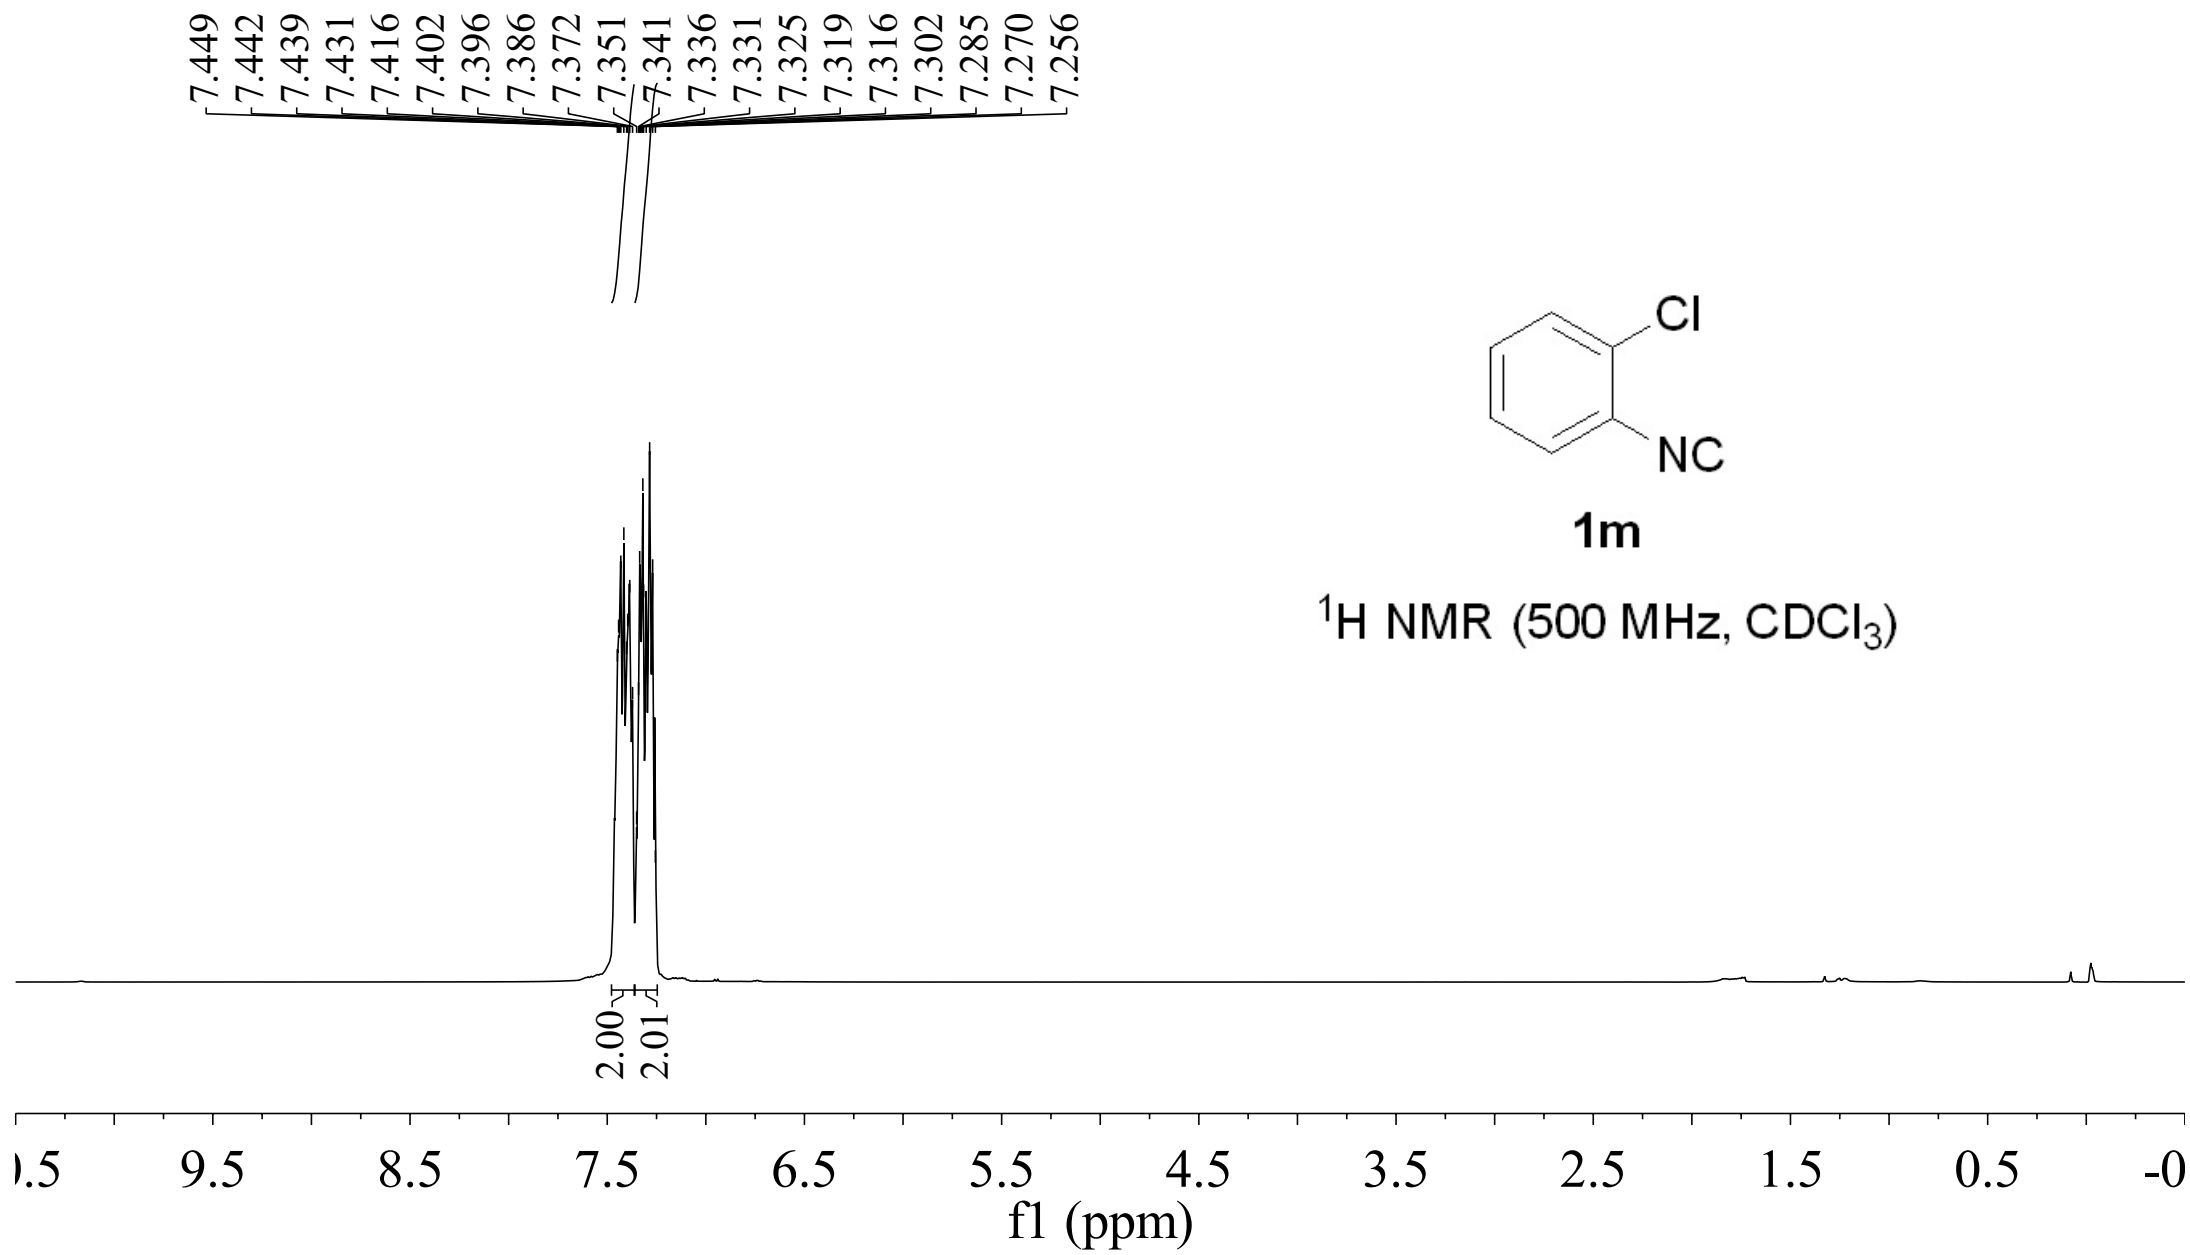

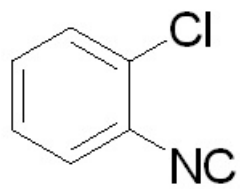

**1m**

$^{13}\text{C}$  NMR (126 MHz,  $\text{CDCl}_3$ )

-169.226

130.572

130.335

130.056

127.917

127.587

125.435

125.293

125.182

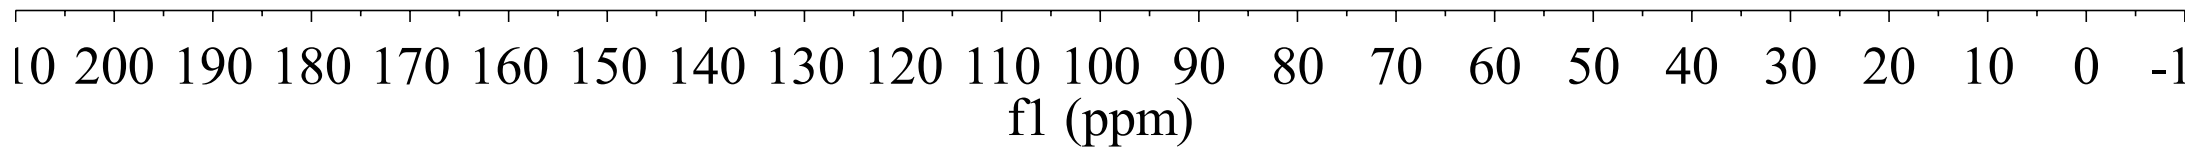

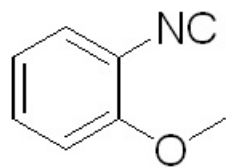

**1n**

<sup>1</sup>H NMR (400 MHz, CDCl<sub>3</sub>)

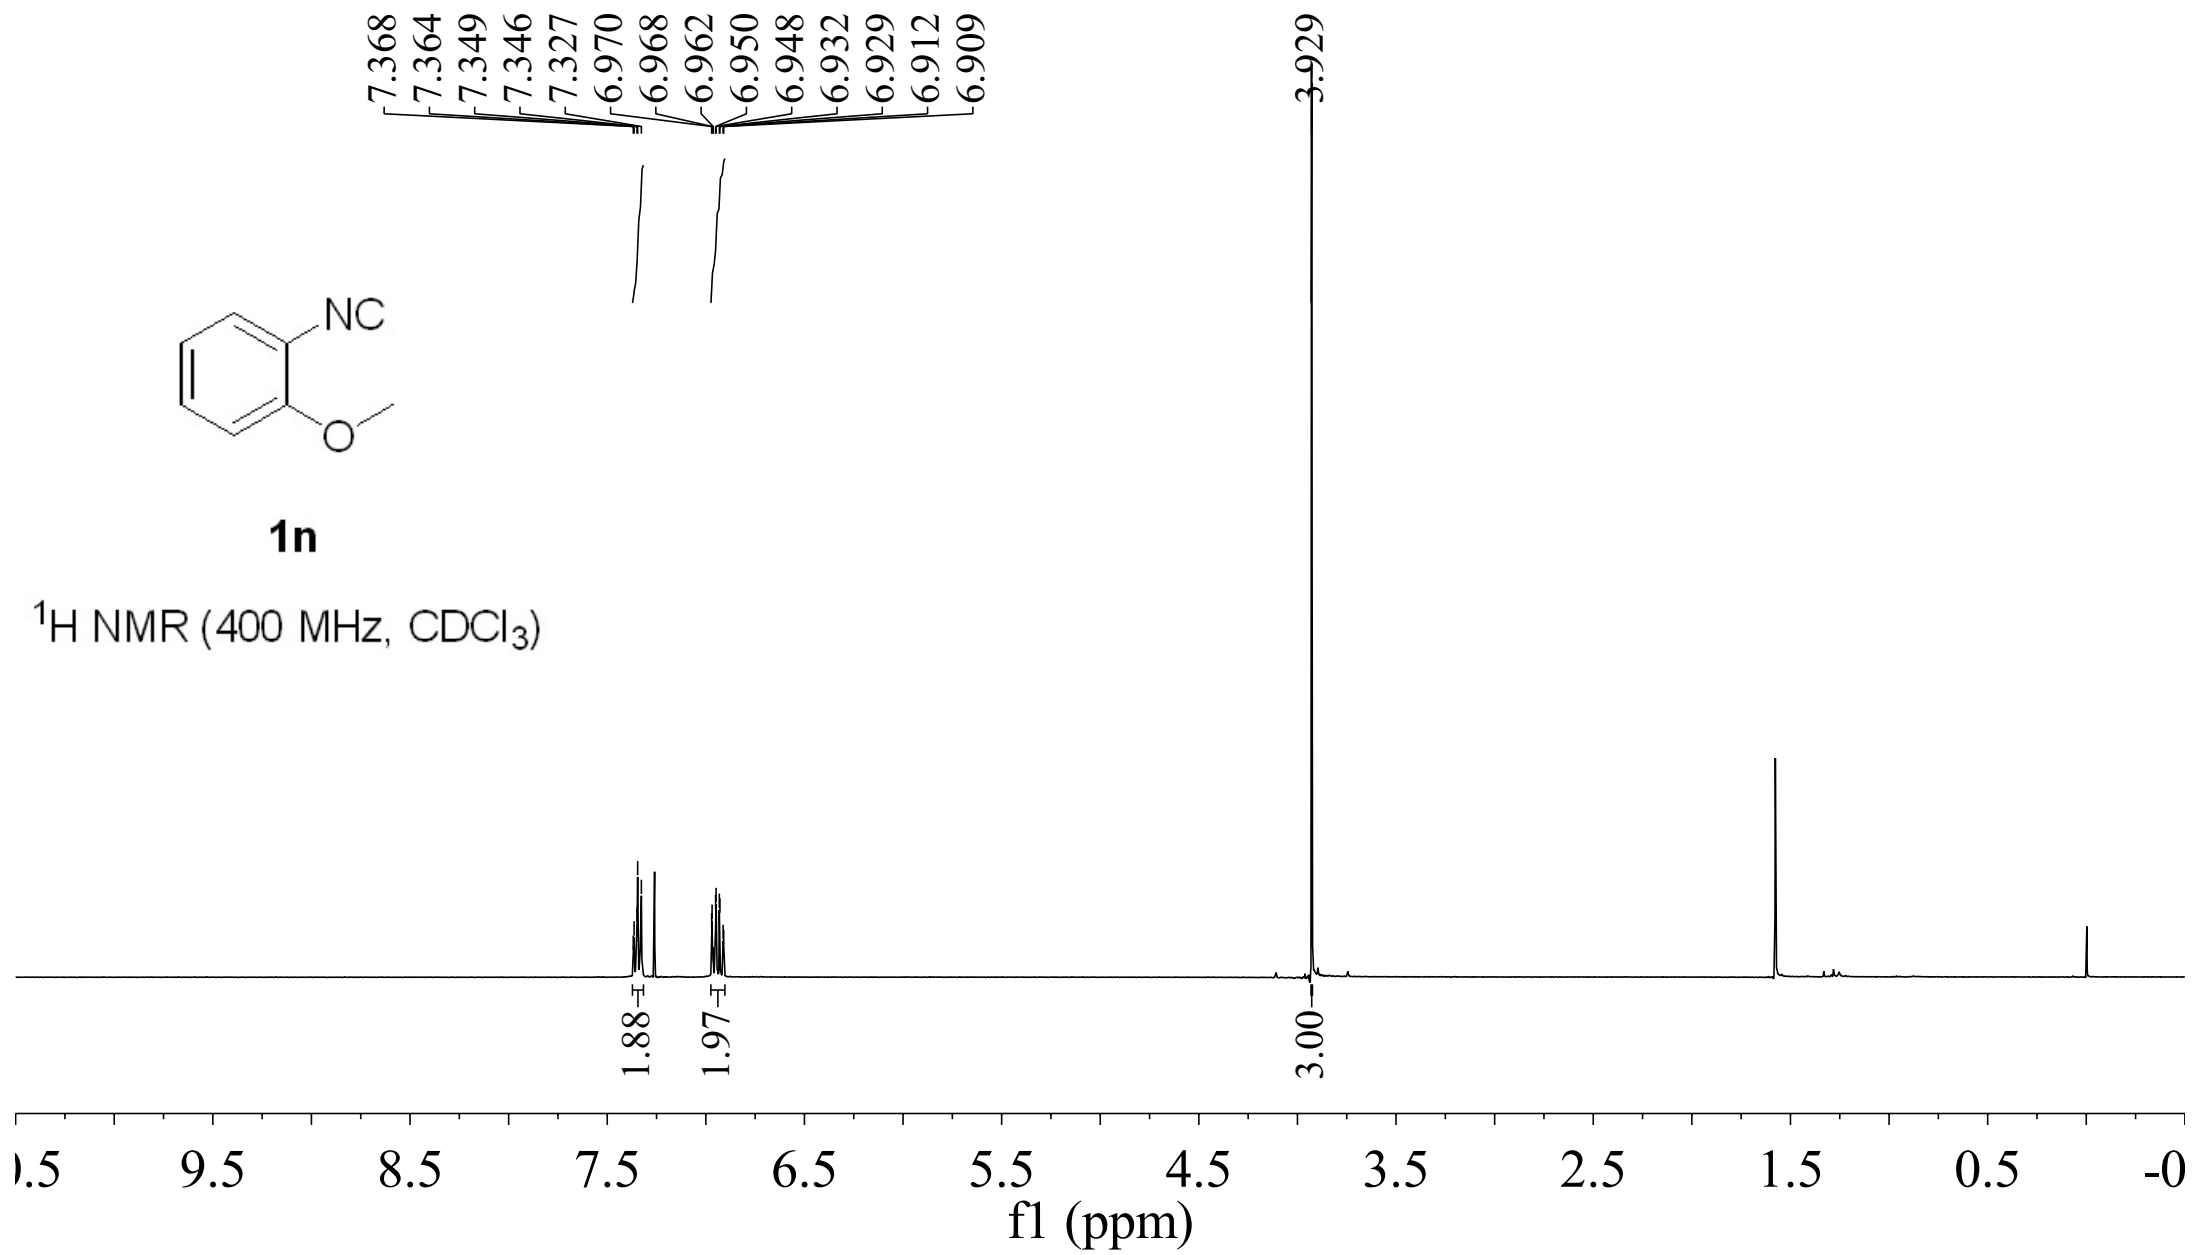

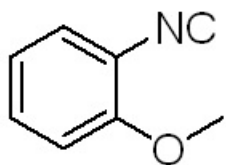

**1n**

$^{13}\text{C}$  NMR (101 MHz,  $\text{CDCl}_3$ )

-167.700

-155.082

130.770

127.769

120.730

116.278

116.171

116.038

112.002

-56.241

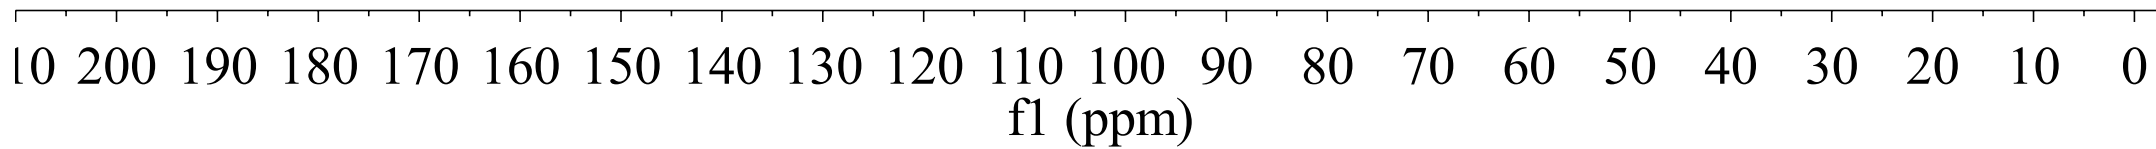

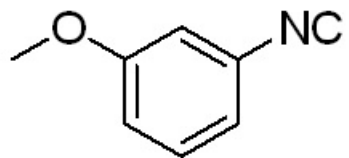

**1o**

<sup>1</sup>H NMR (400 MHz, CDCl<sub>3</sub>)

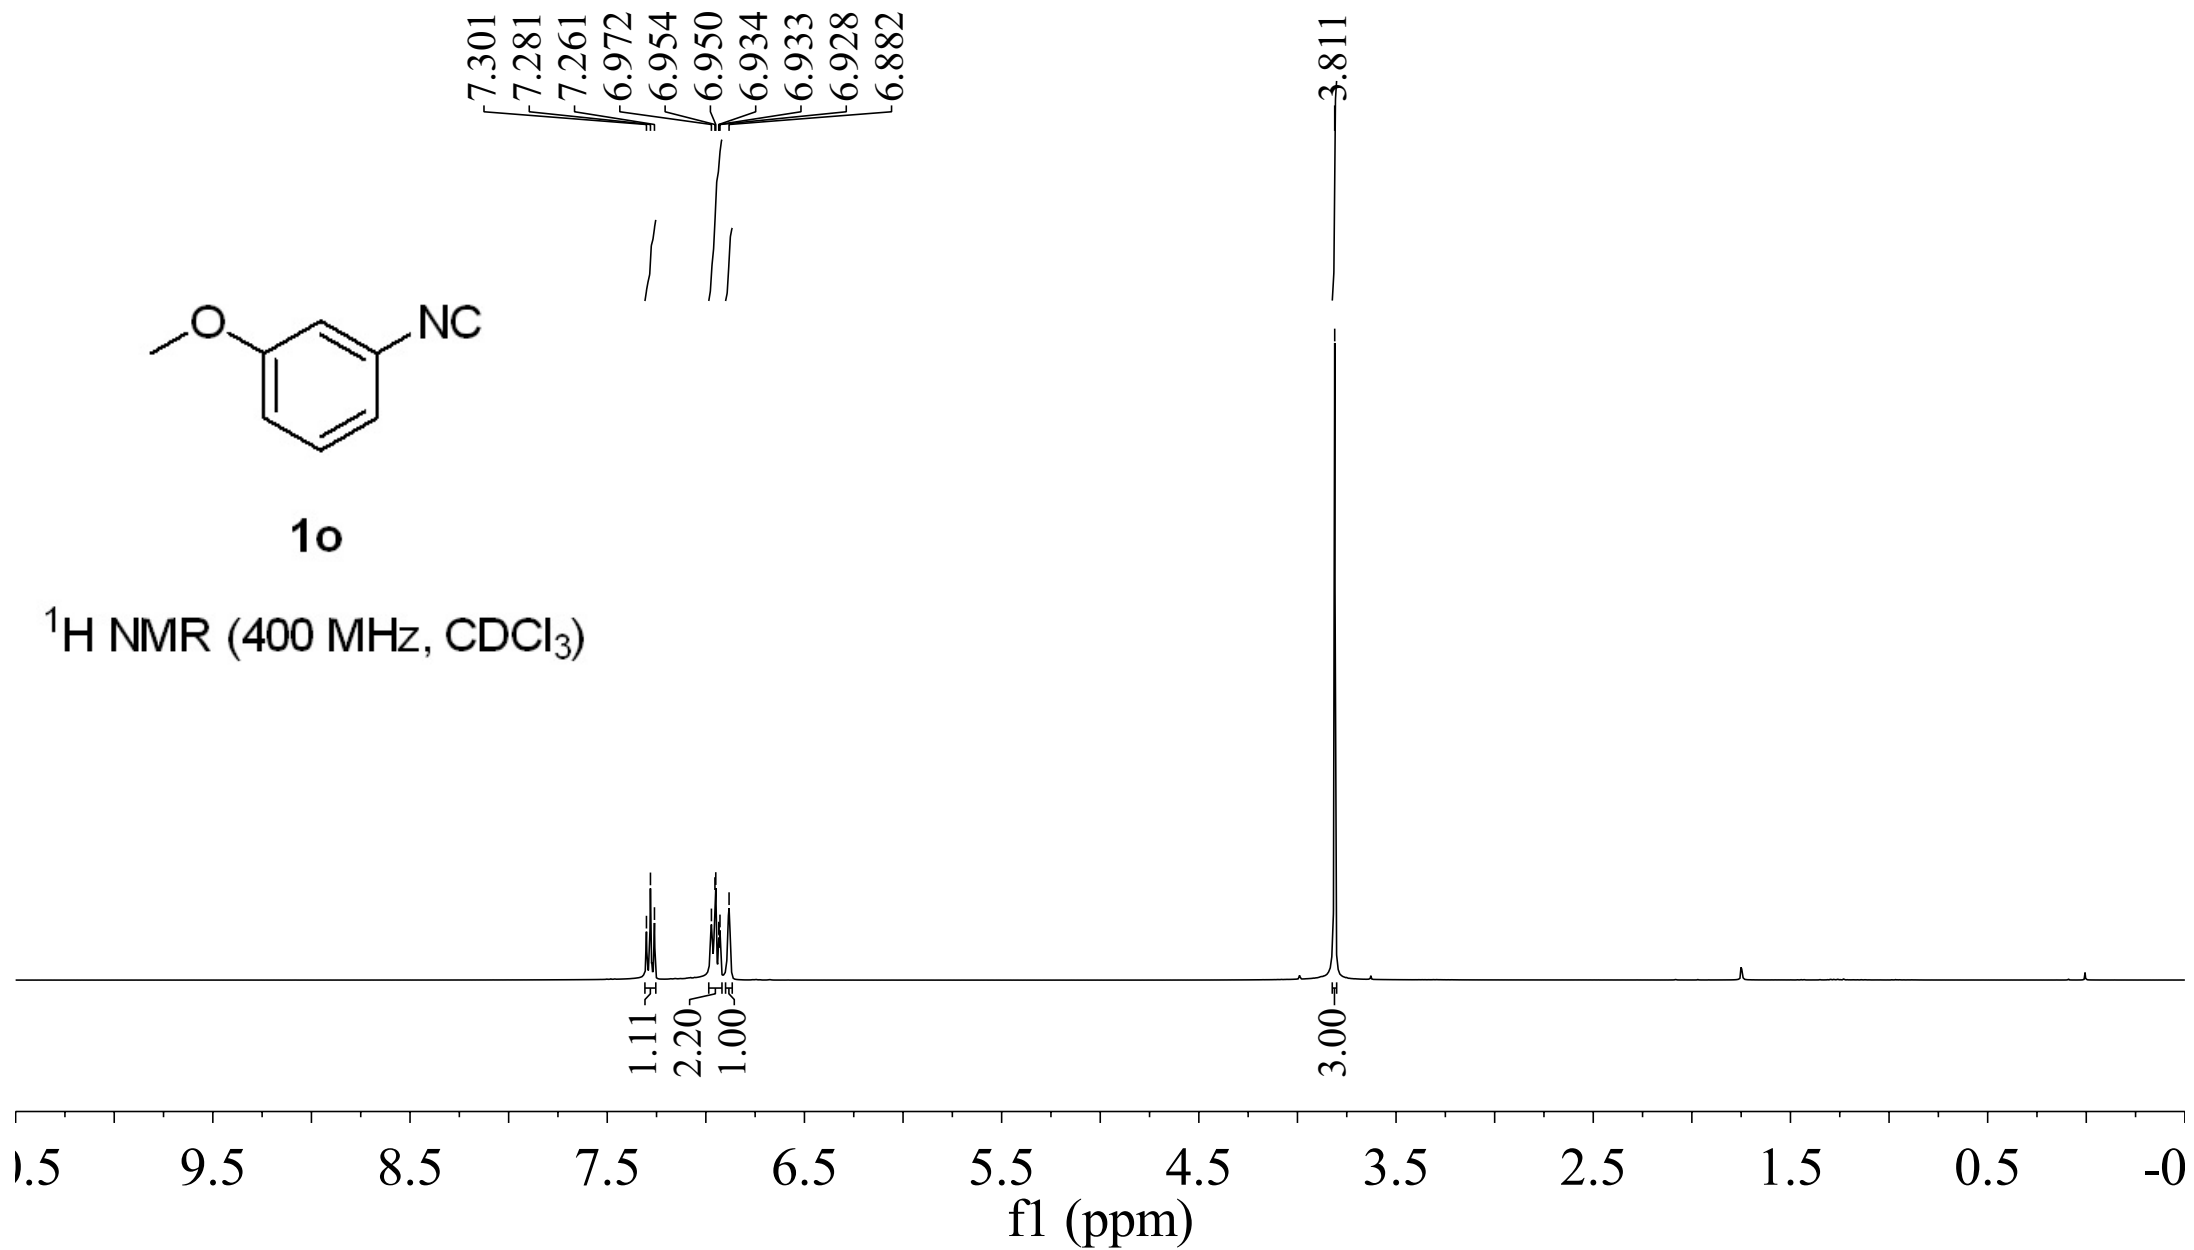

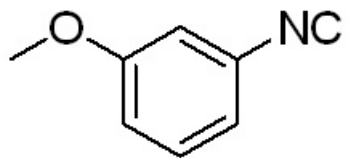

**1o**

<sup>13</sup>C NMR (101 MHz, CDCl<sub>3</sub>)

~163.787  
~159.823

130.027  
127.217  
127.083  
126.959  
118.384  
115.390  
111.626

55.328

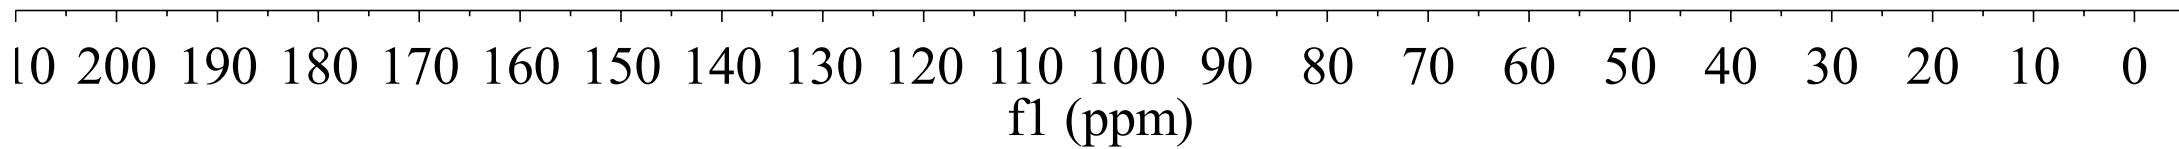

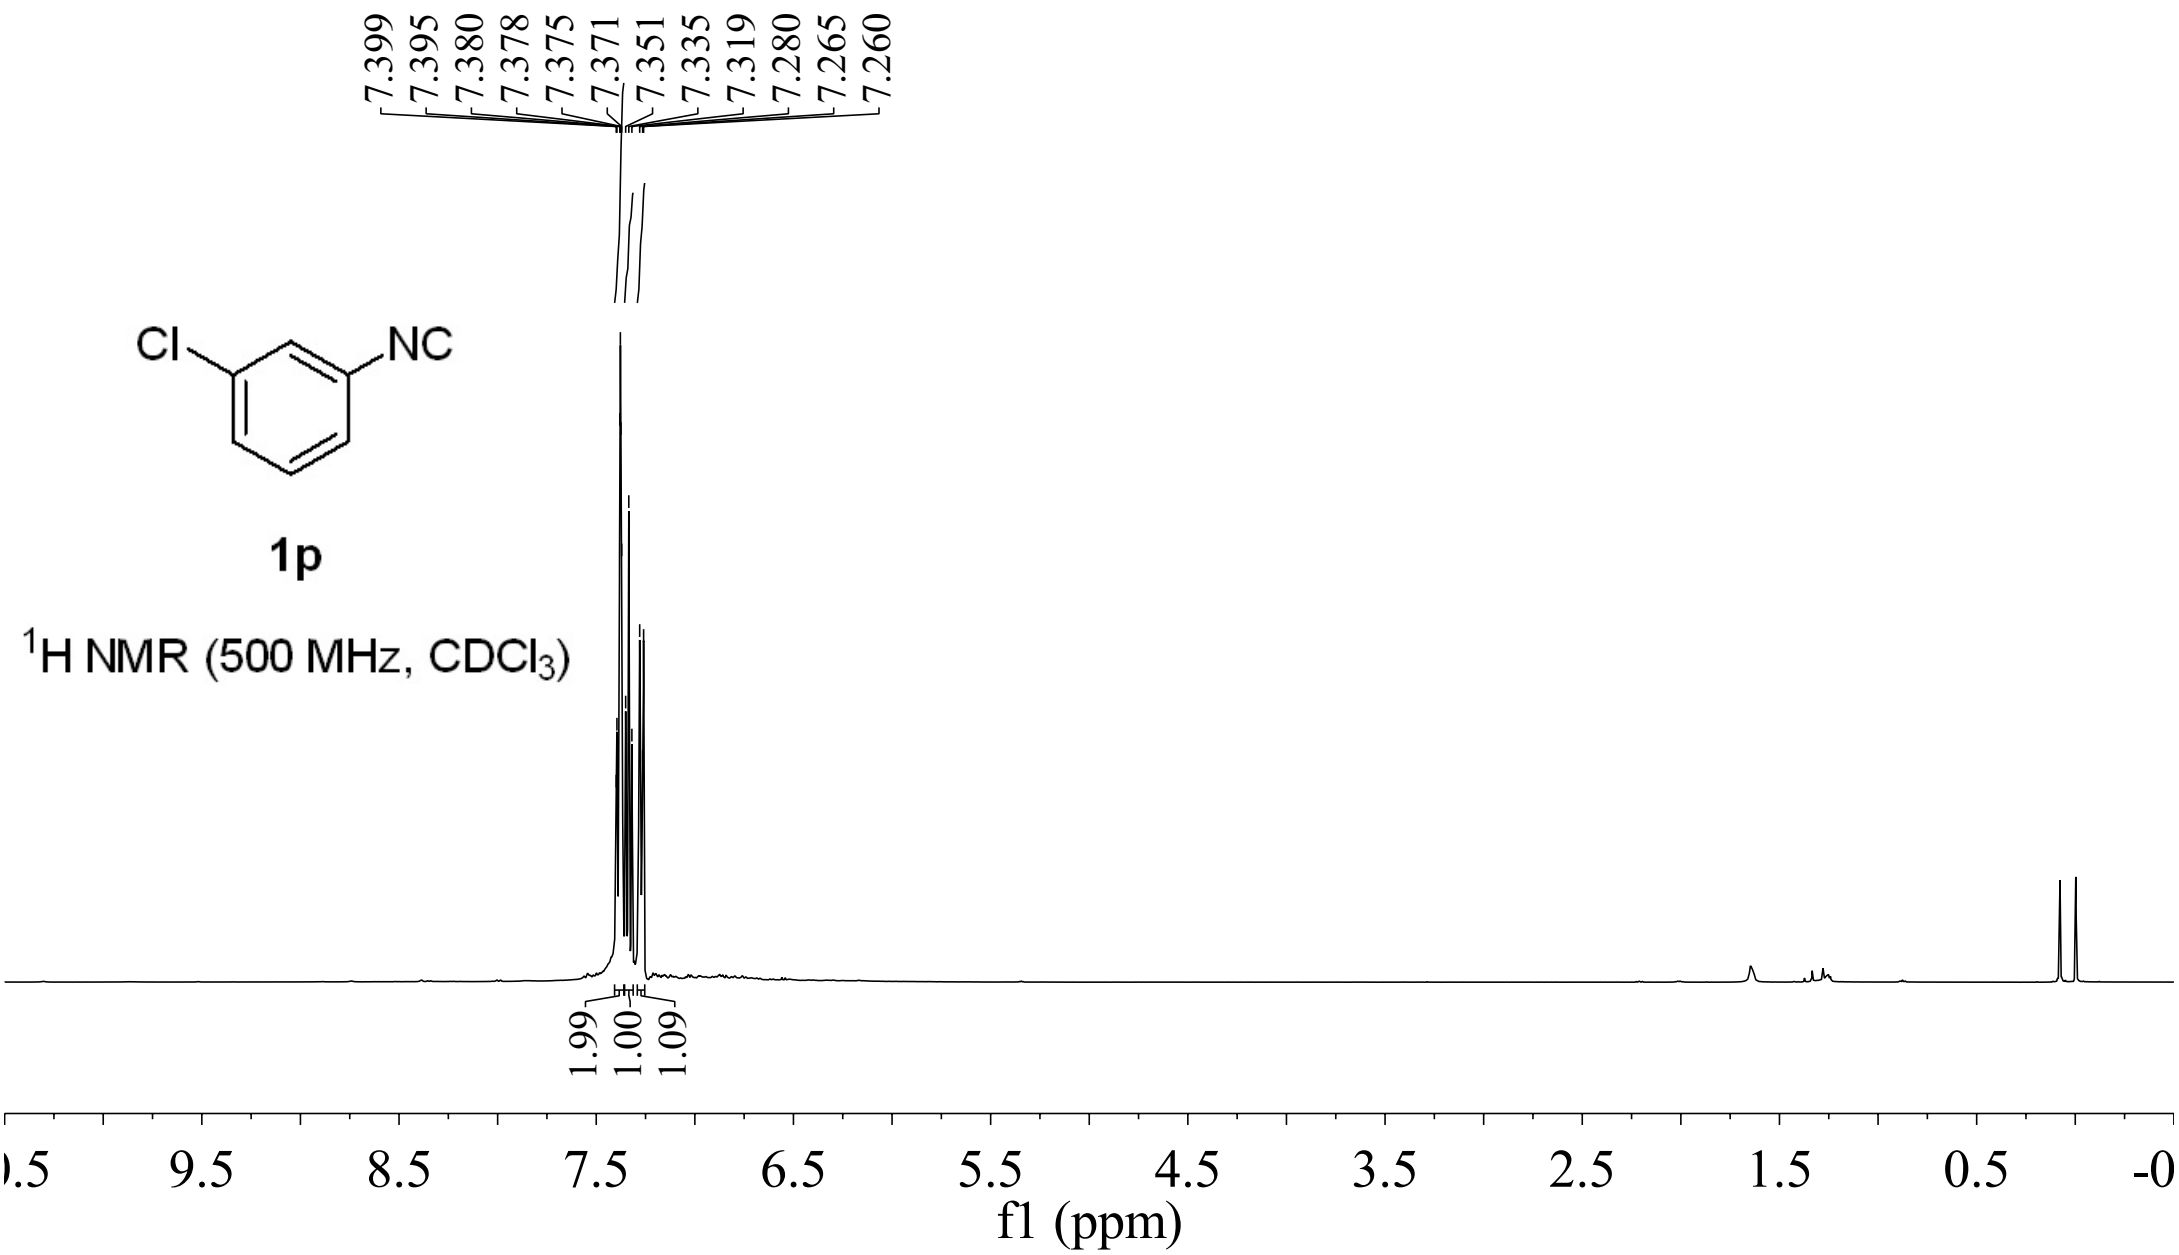



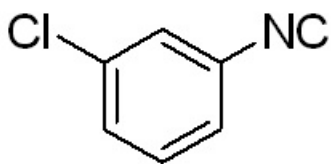

**1p**

$^{13}\text{C}$  NMR (126 MHz,  $\text{CDCl}_3$ )

—166.003

135.204  
130.581  
129.925  
127.624  
127.515  
127.408  
126.680  
124.743

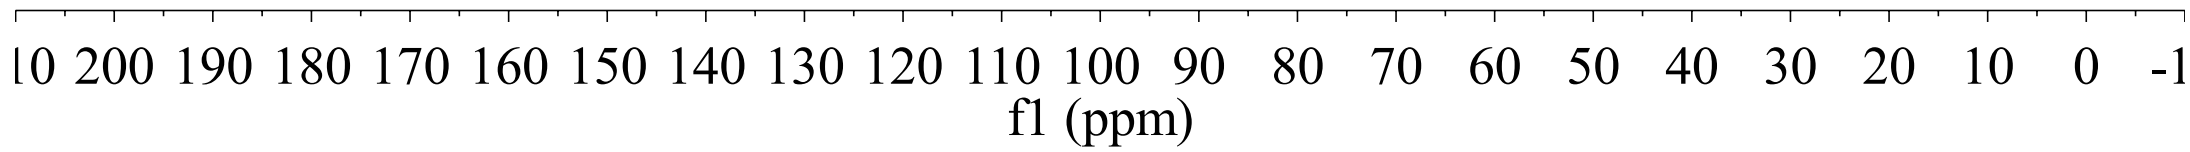

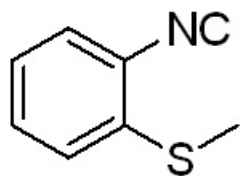

**1q**

<sup>1</sup>H NMR (400 MHz, CDCl<sub>3</sub>)

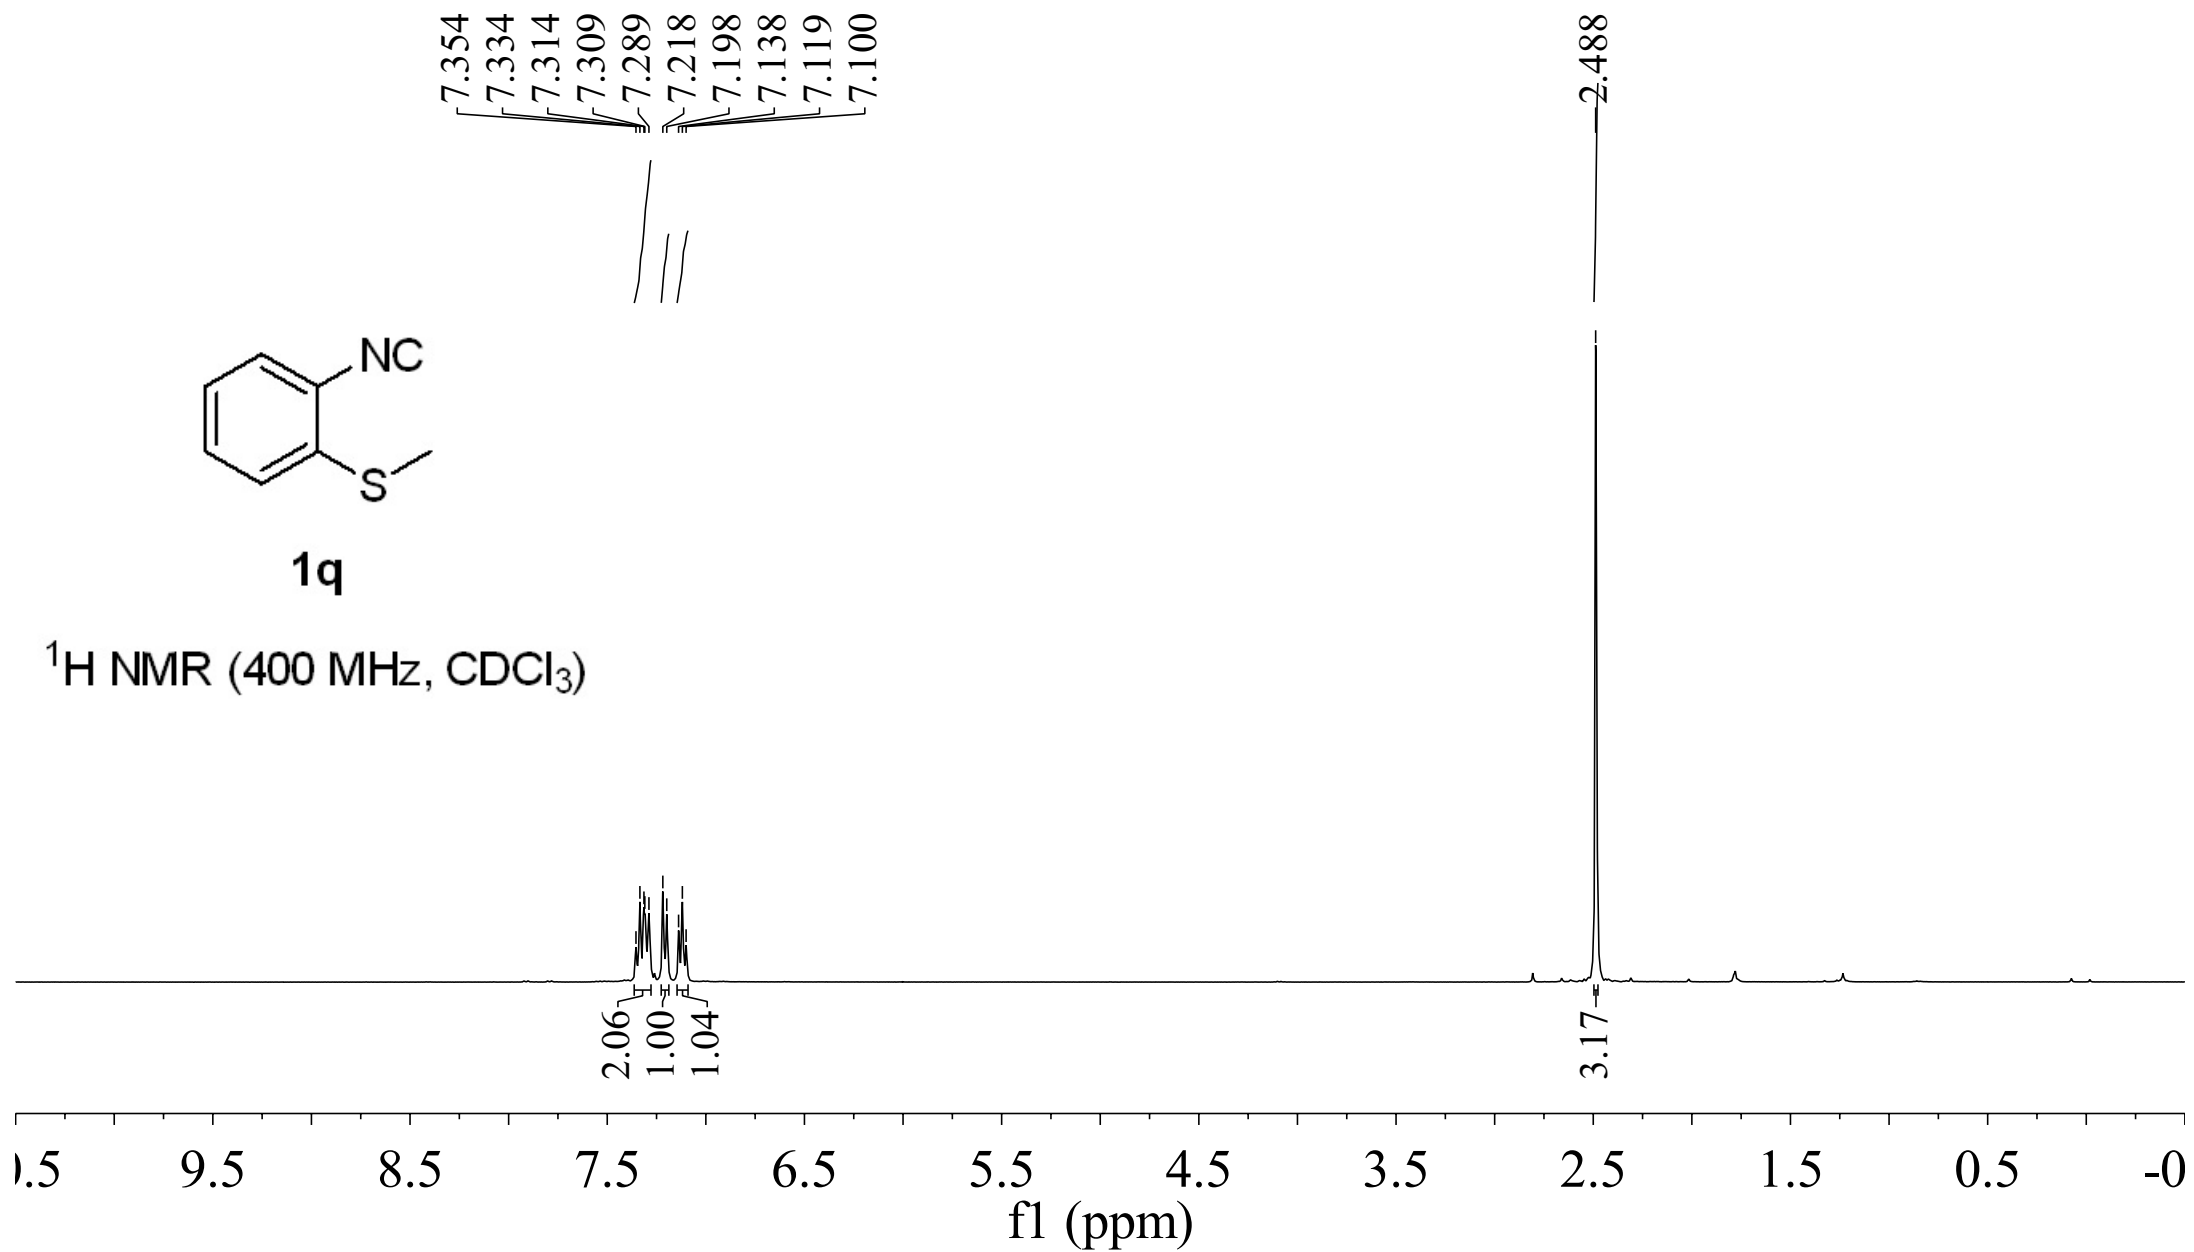

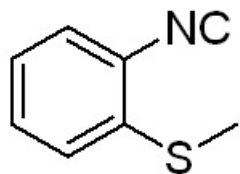

**1q**

$^{13}\text{C}$  NMR (101 MHz,  $\text{CDCl}_3$ )

—168.158

136.200

129.408

126.626

125.147

124.770

123.987

—14.546

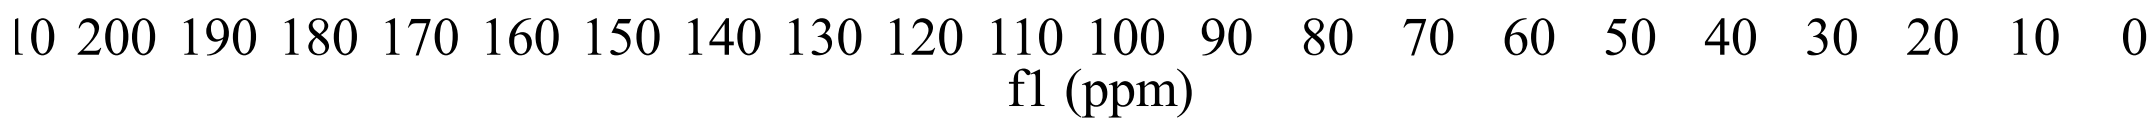

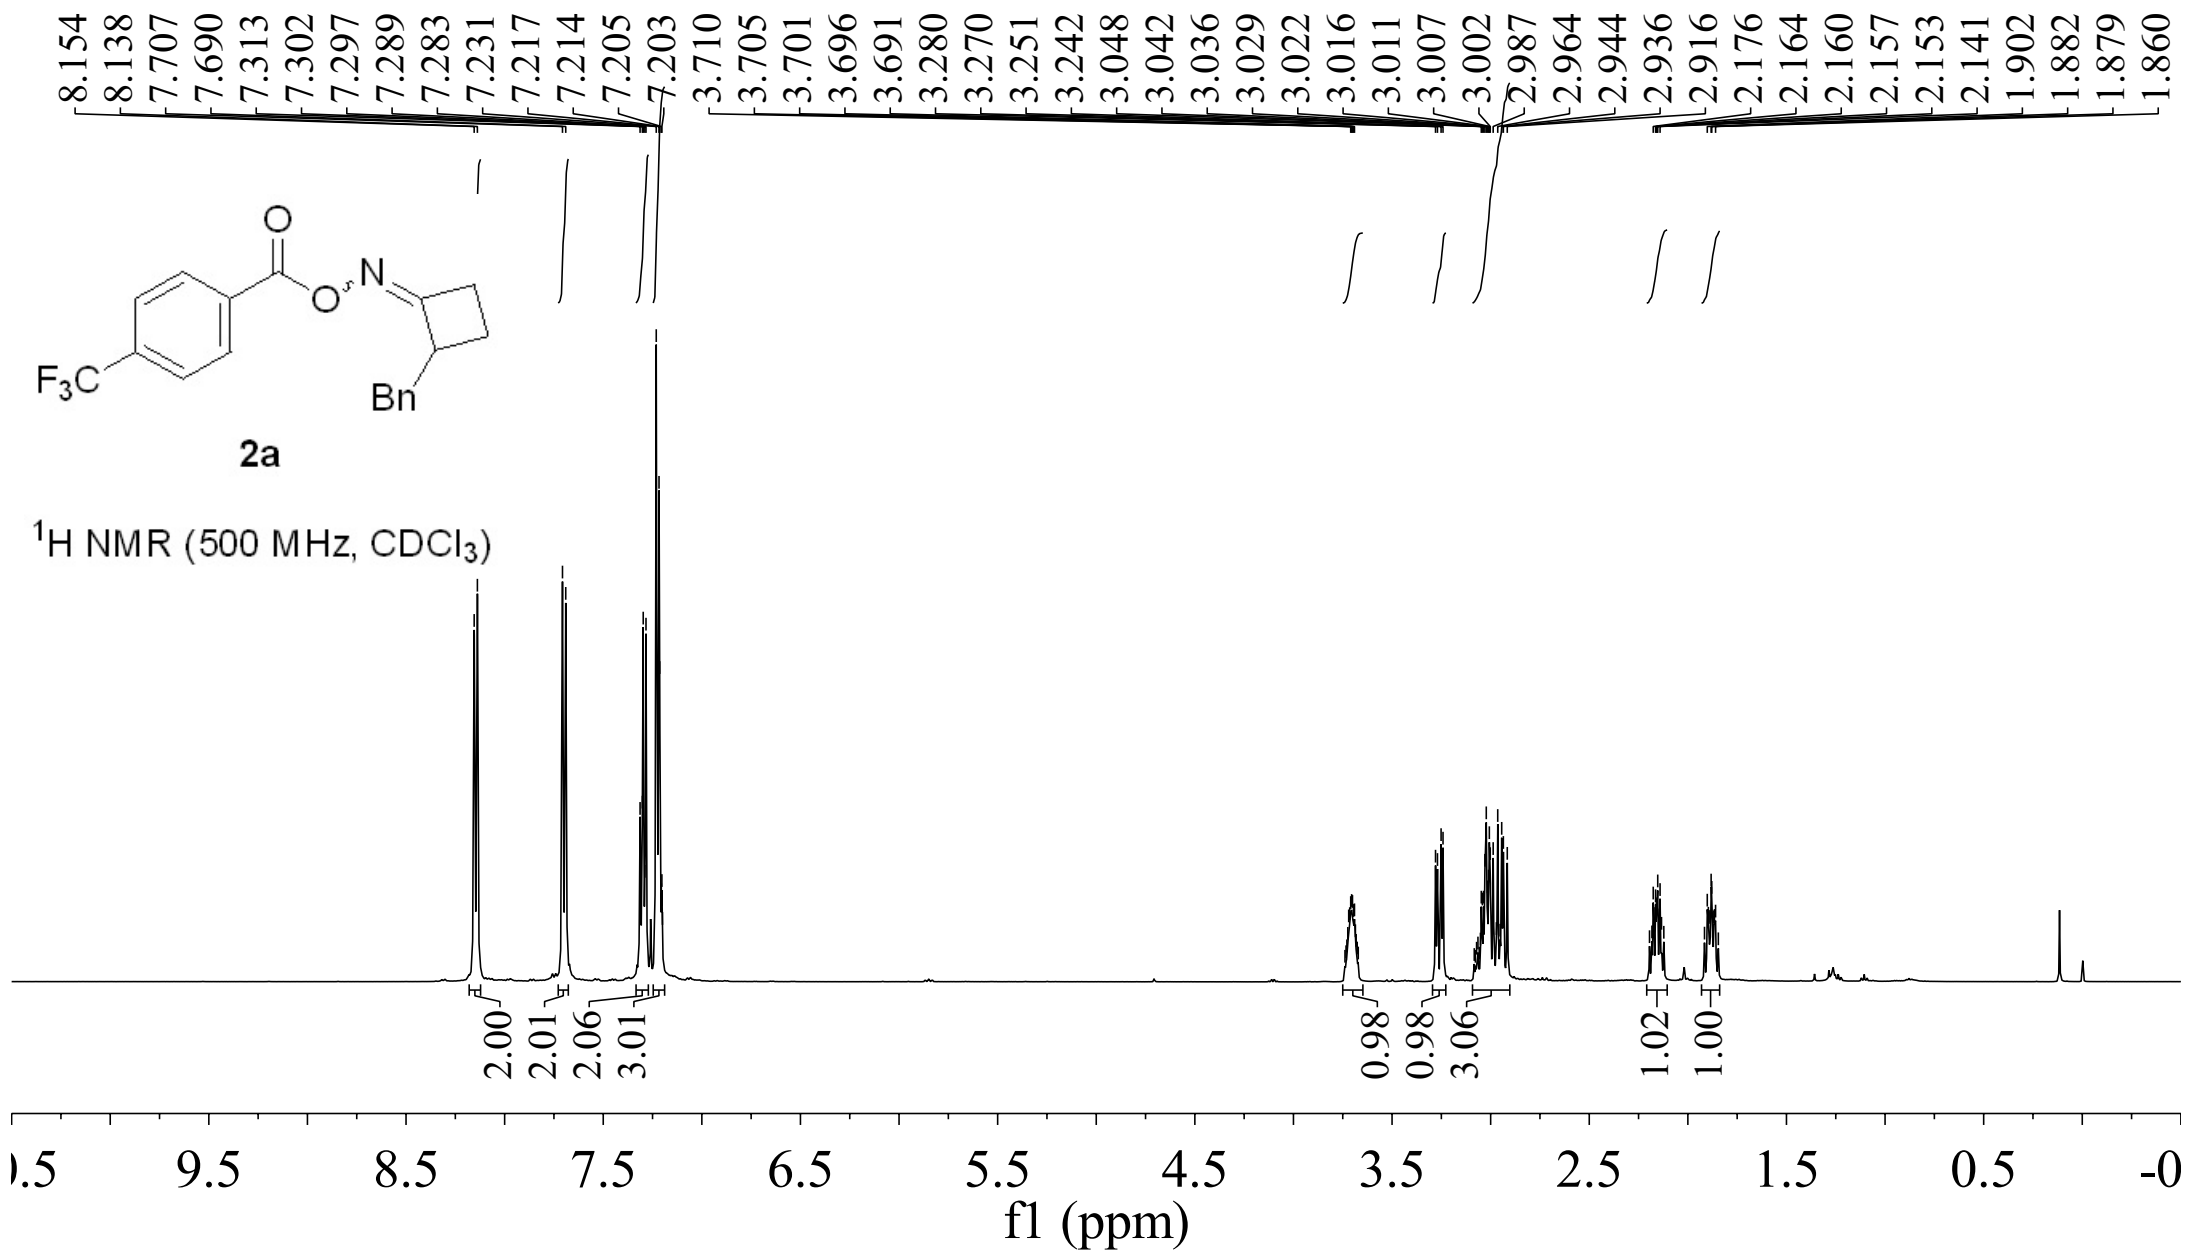

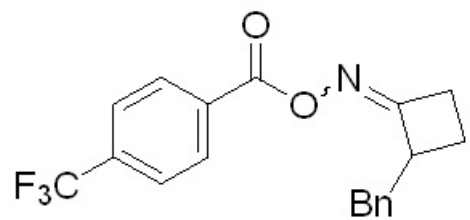

<sup>13</sup>C NMR (126 MHz, CDCl<sub>3</sub>)

172.347  
162.753  
138.423  
134.917  
134.658  
134.398  
134.138  
132.399  
129.940  
128.819  
128.492  
126.786  
126.466  
125.507  
125.477  
125.447  
125.418  
124.617  
122.449  
120.280  
46.352  
37.780  
28.994  
20.476

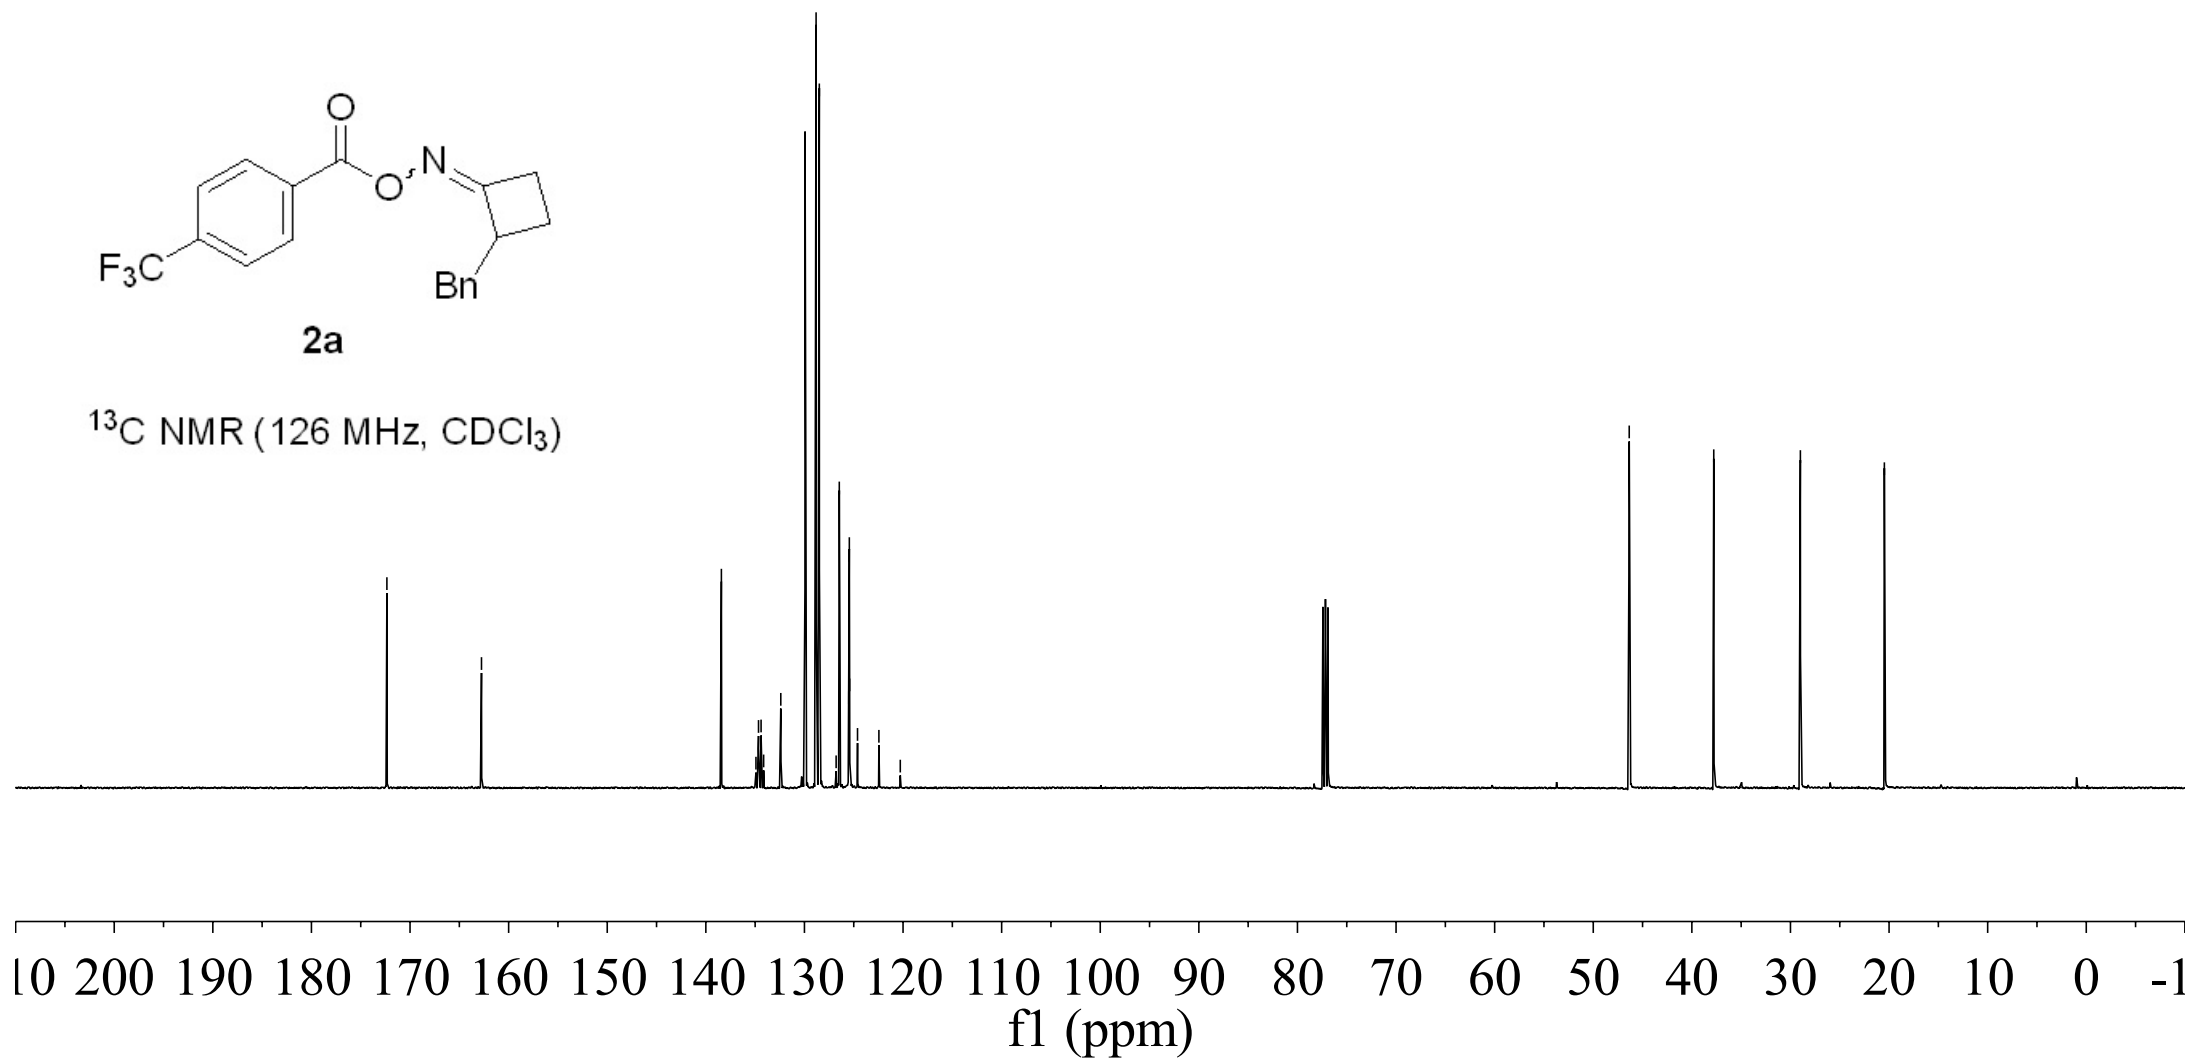

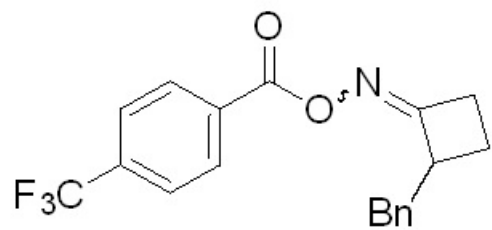

**2a**

$^{19}\text{F}$  NMR (376 MHz,  $\text{CDCl}_3$ )

--63.127

10      -10      -30      -50      -70      -90      -110      -130      -150      -170      -190      -210  
fl (ppm)

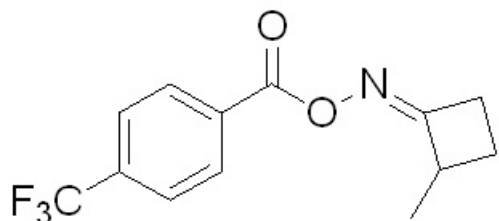

**2b**

<sup>1</sup>H NMR (500 MHz, CDCl<sub>3</sub>)

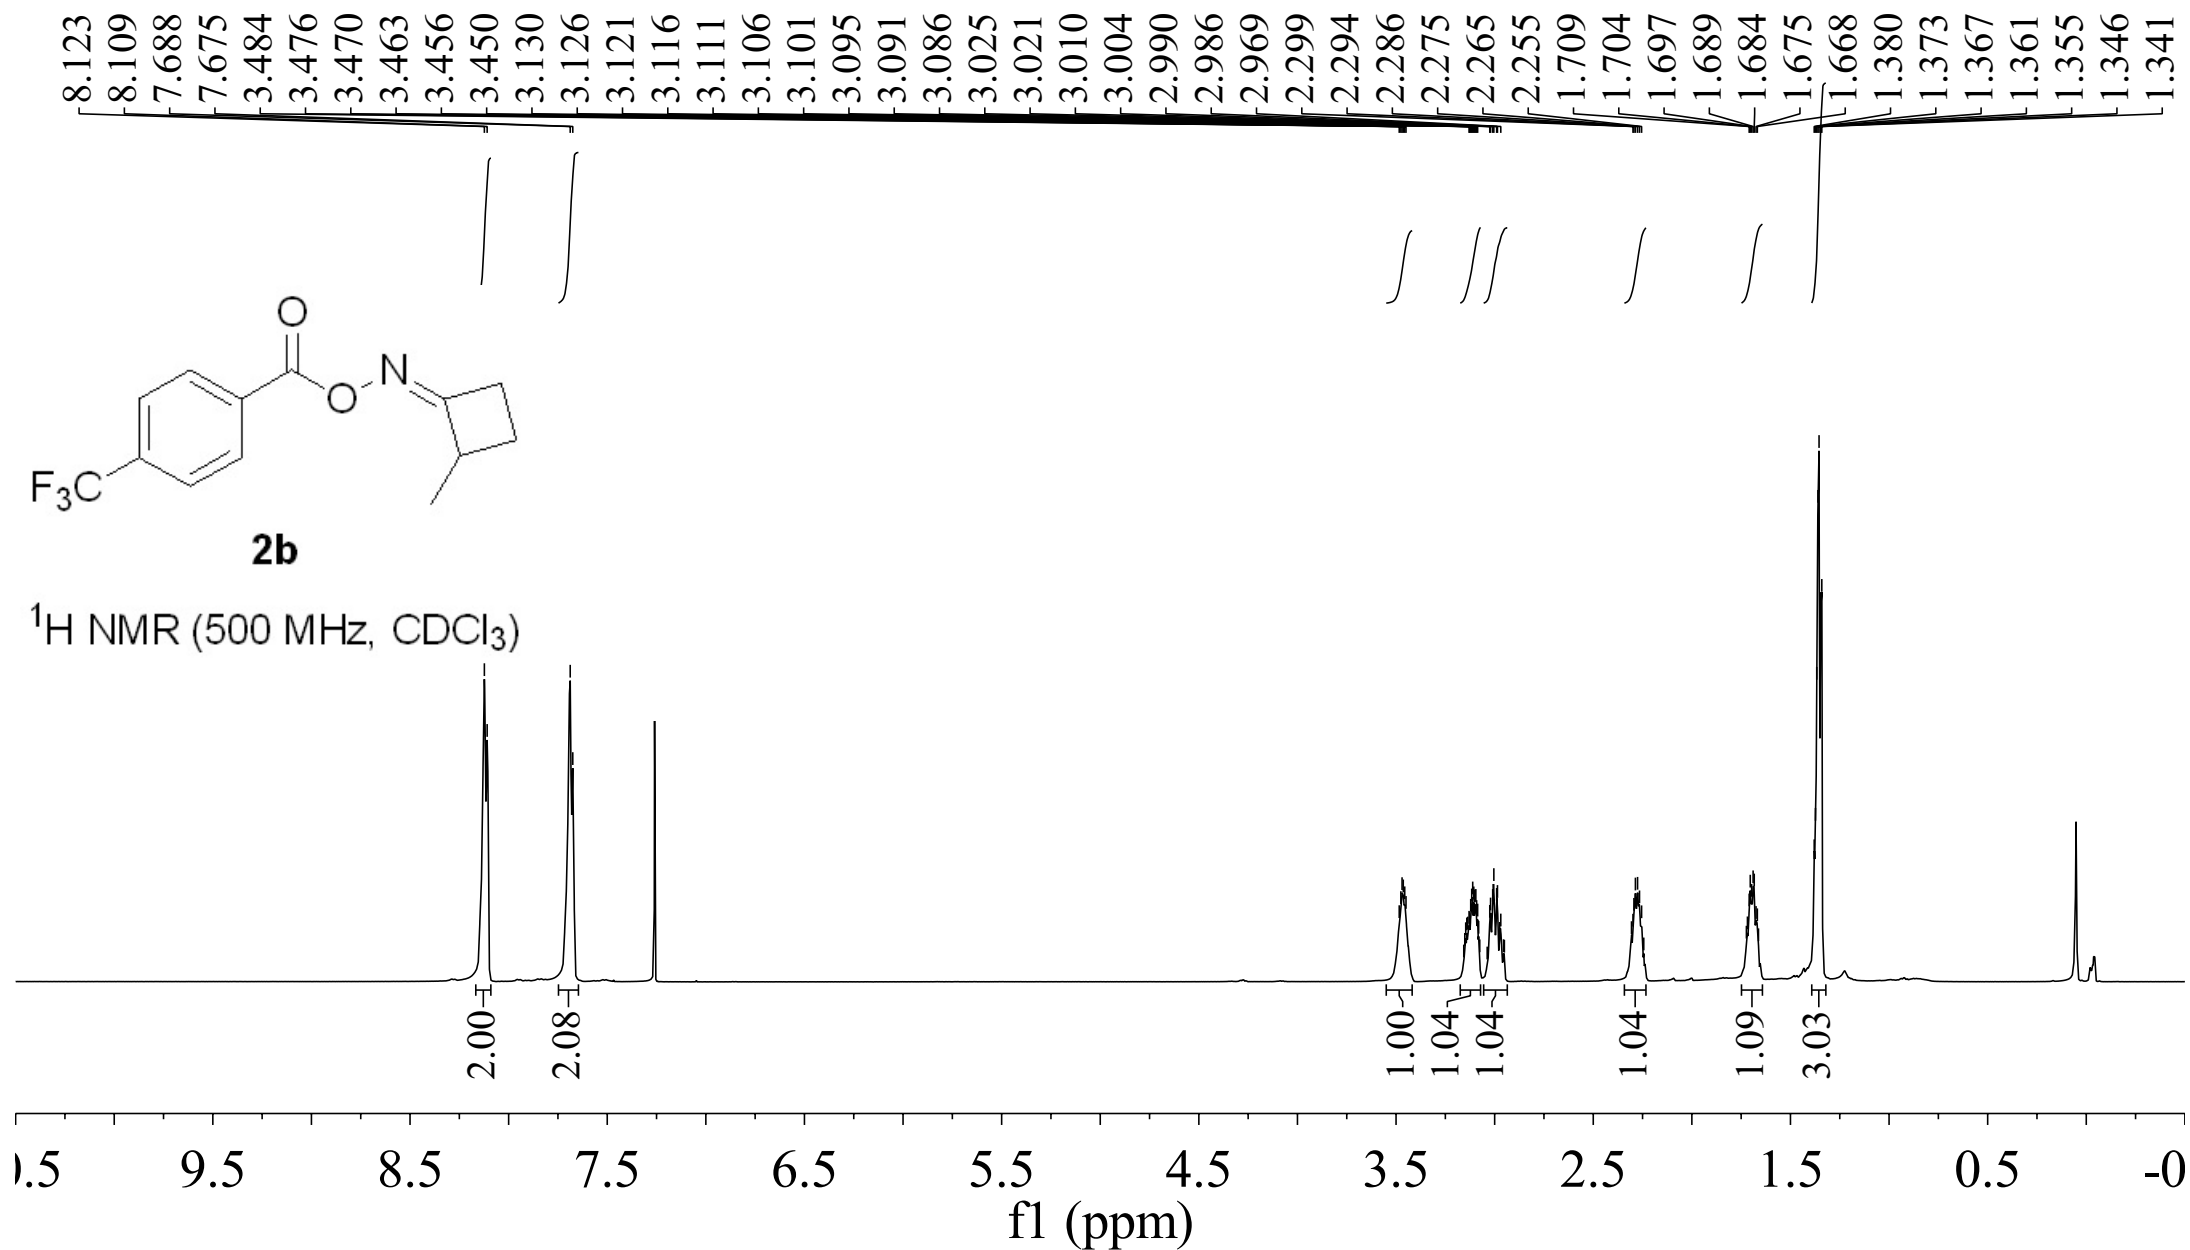

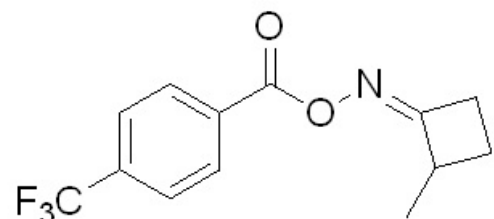

**2b**

$^{13}\text{C}$  NMR (126 MHz,  $\text{CDCl}_3$ )

173.881  
162.924  
135.028  
134.764  
134.509  
134.247  
132.585  
130.019  
126.872  
125.590  
125.560  
125.532  
125.506  
124.704  
122.534  
120.364

40.640

~29.210

~22.797

~17.454





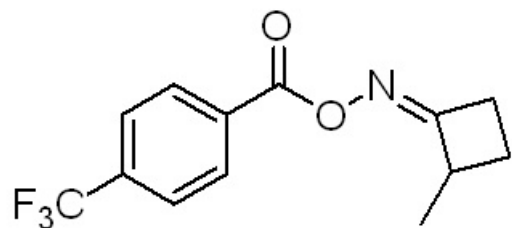

**2b**

$^{19}\text{F}$  NMR (471 MHz,  $\text{CDCl}_3$ )

-63.233

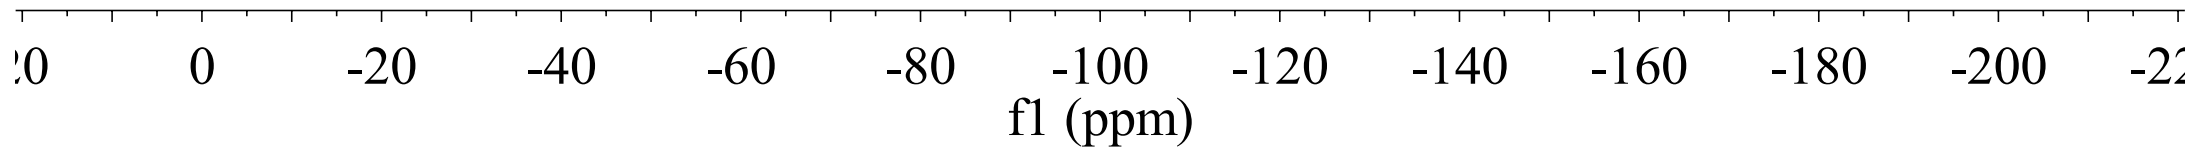

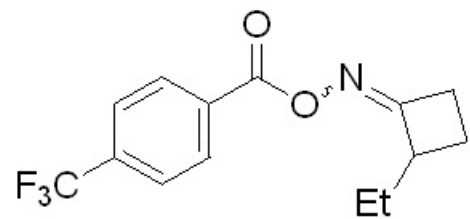

<sup>1</sup>H NMR (500 MHz, CDCl<sub>3</sub>)

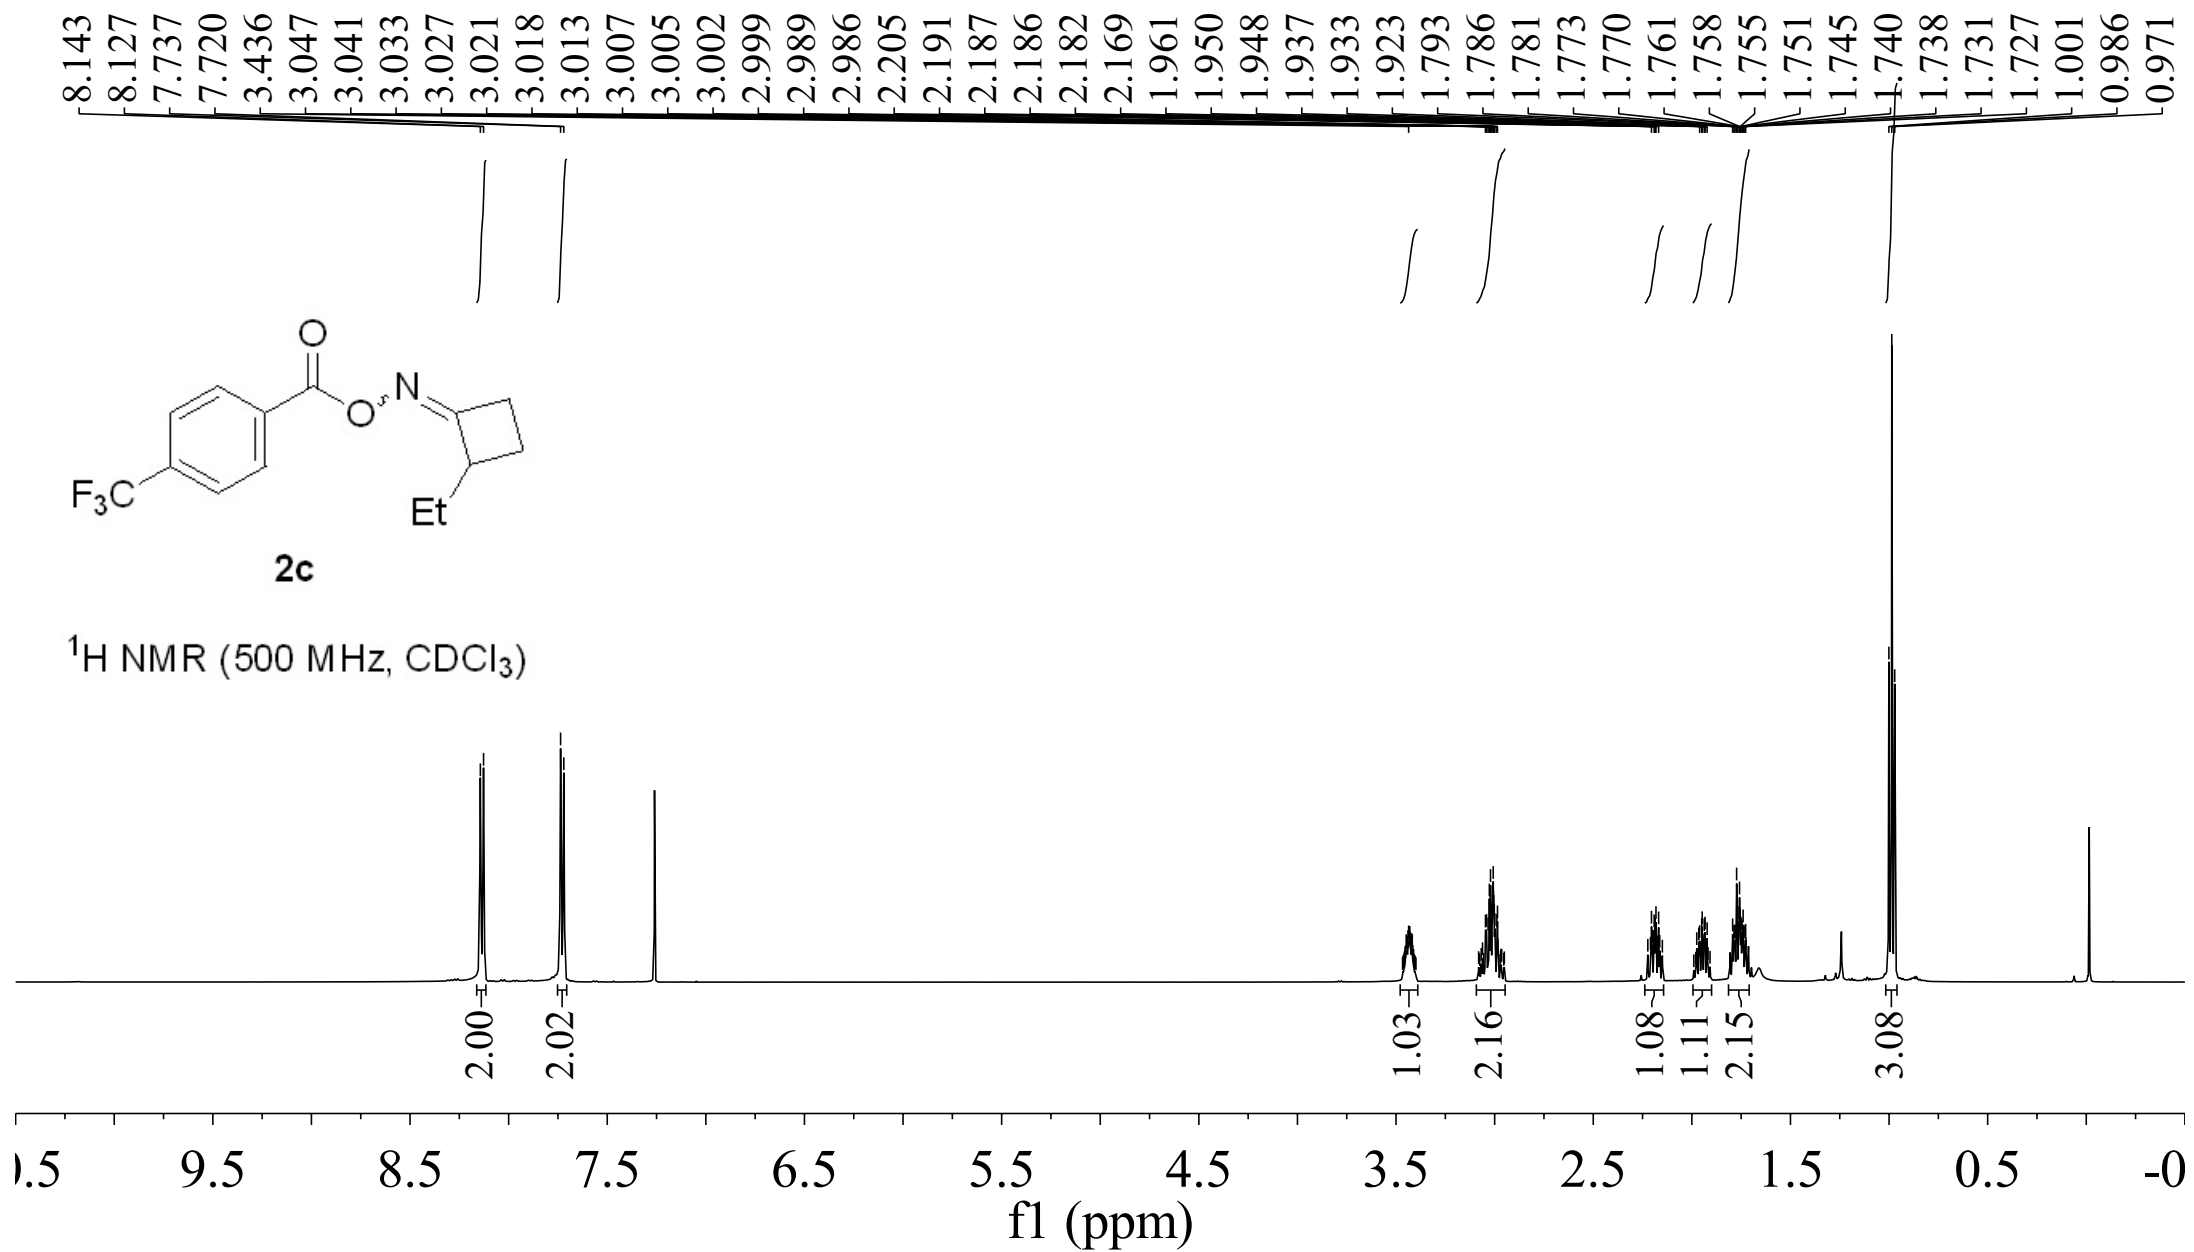

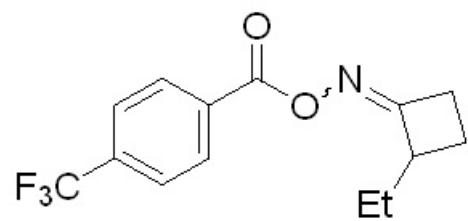

2c

<sup>13</sup>C NMR (126 MHz, CDCl<sub>3</sub>)

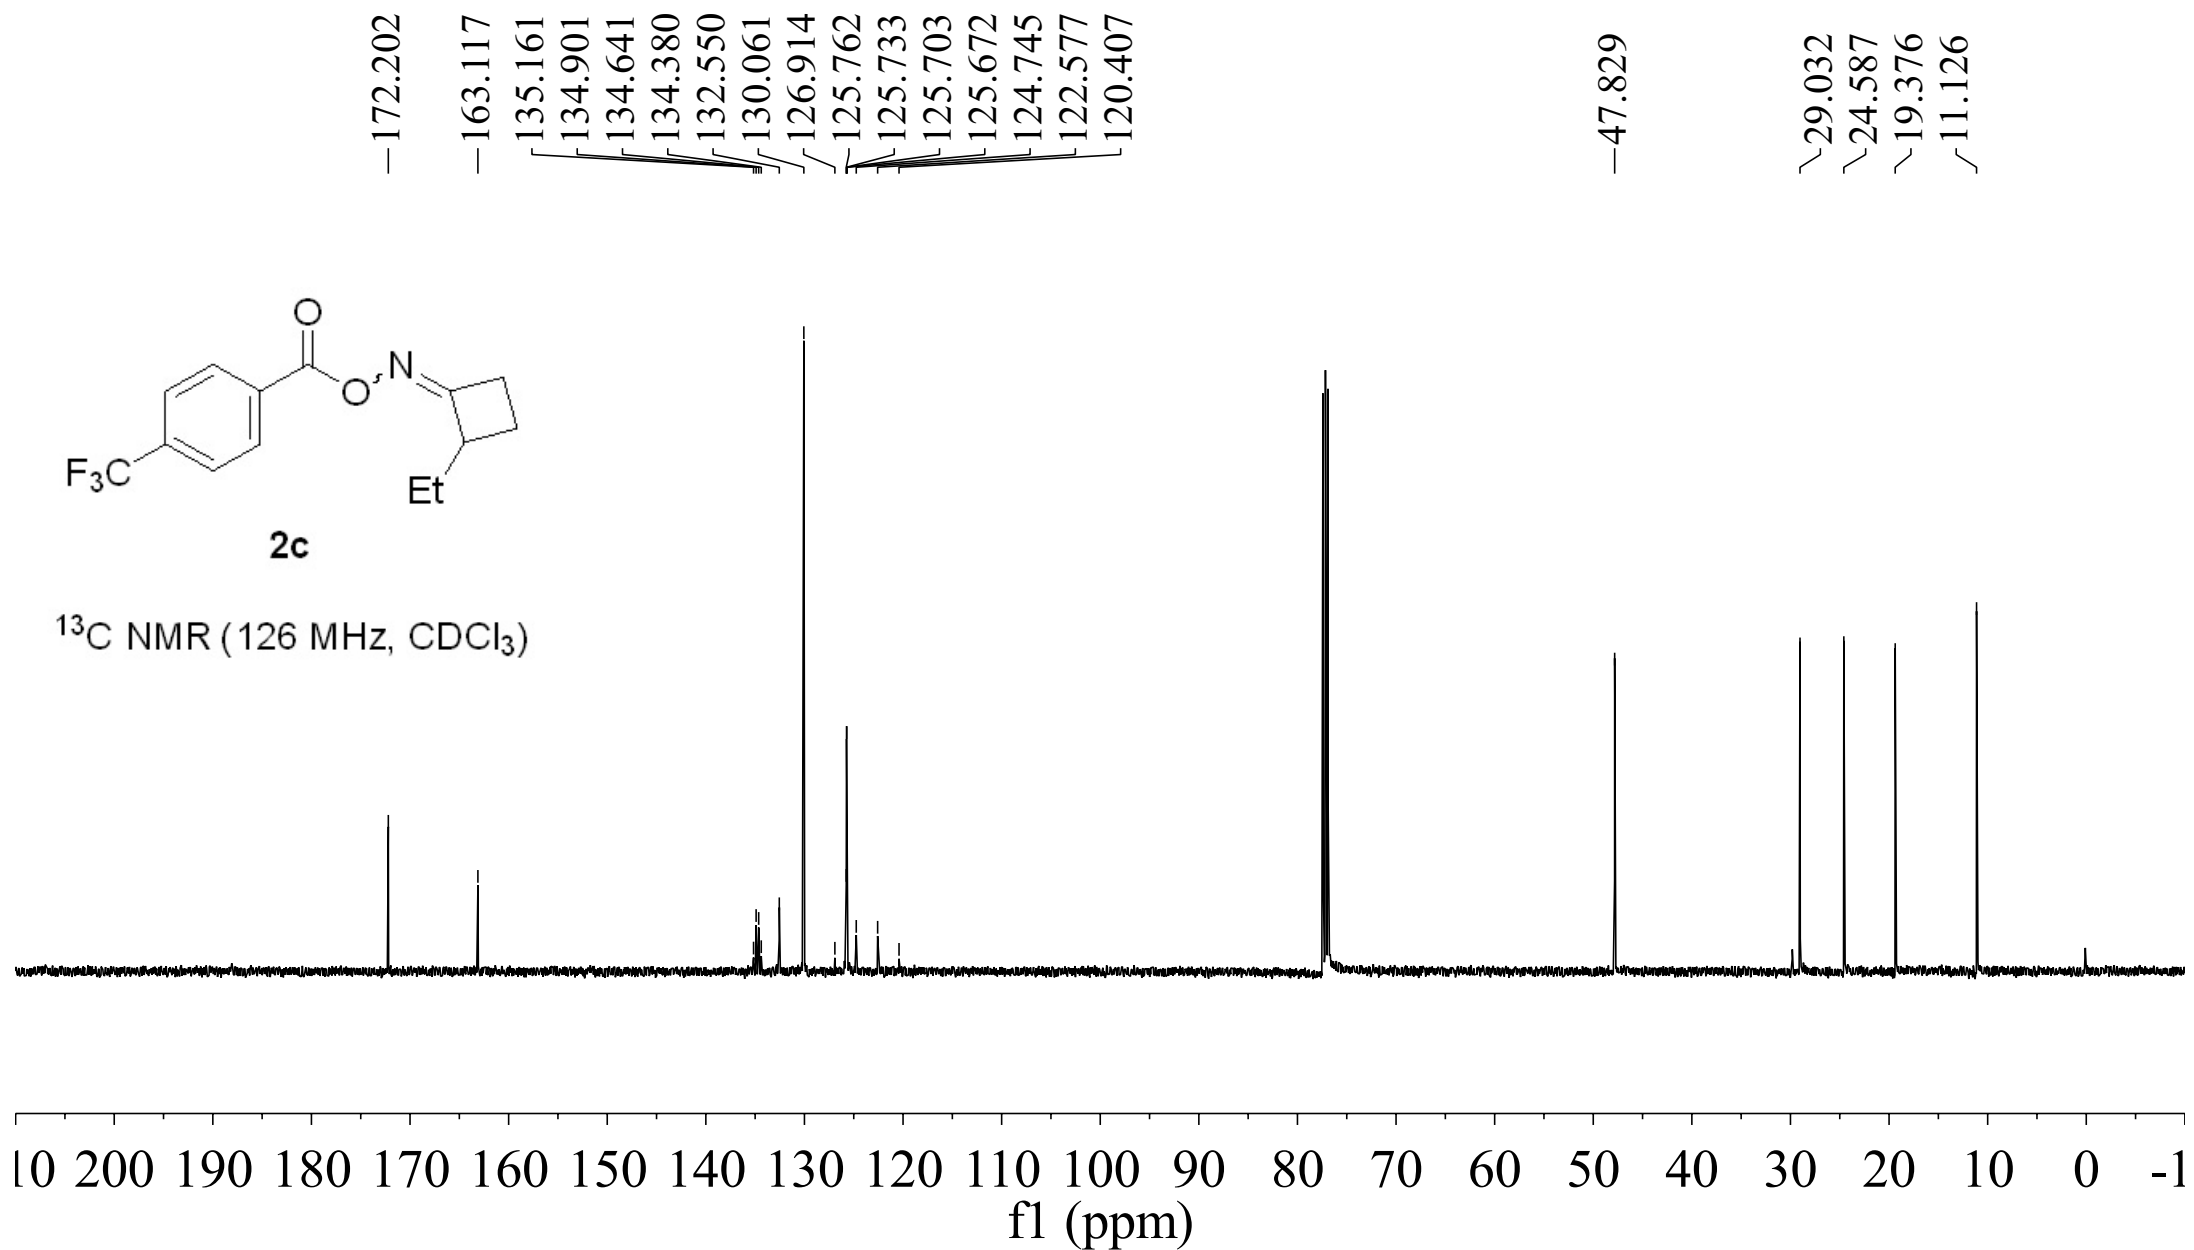

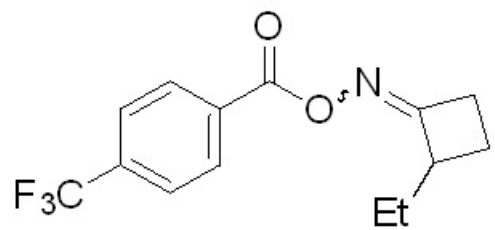

**2c**

<sup>19</sup>F NMR (471 MHz, CDCl<sub>3</sub>)

-63.206

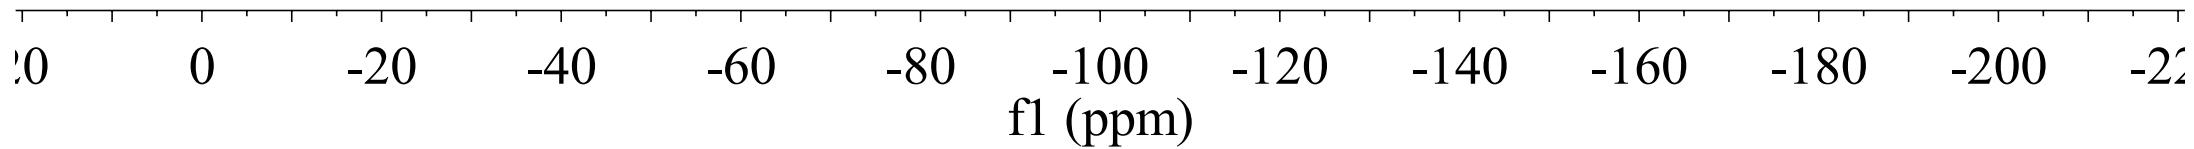

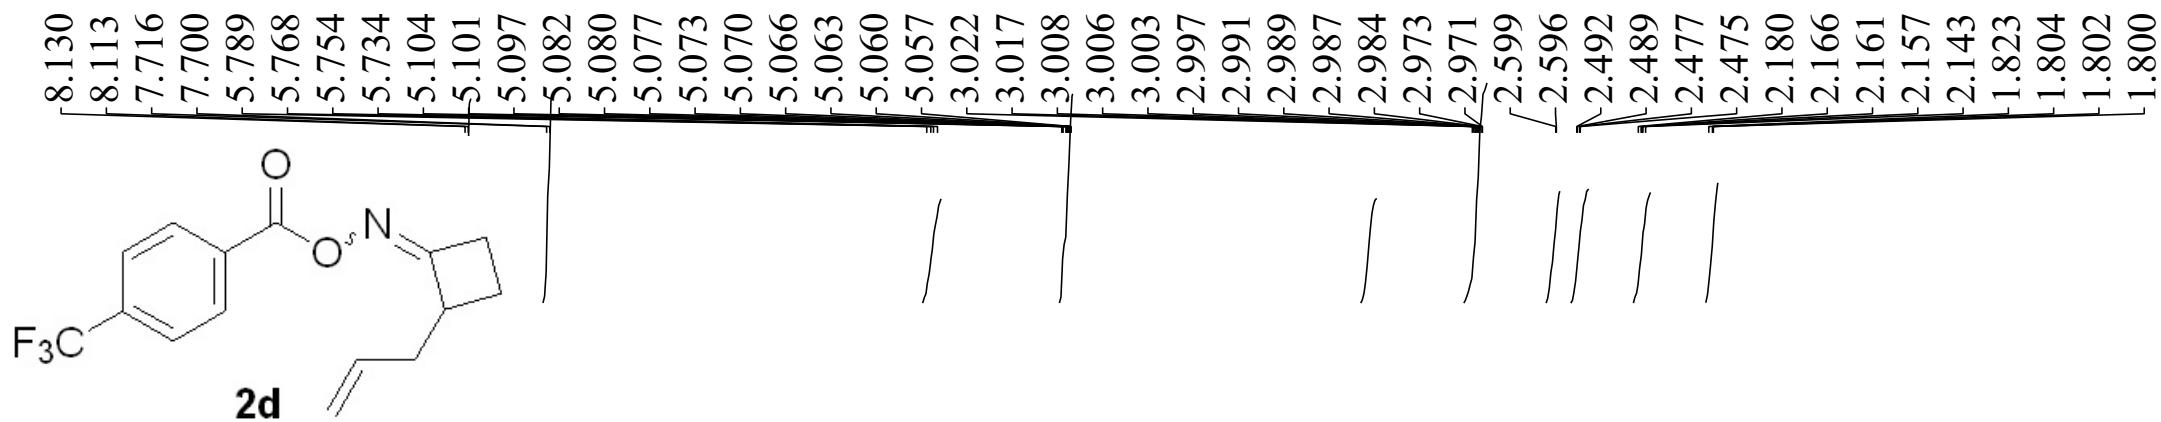

<sup>1</sup>H NMR (500 MHz, CDCl<sub>3</sub>)

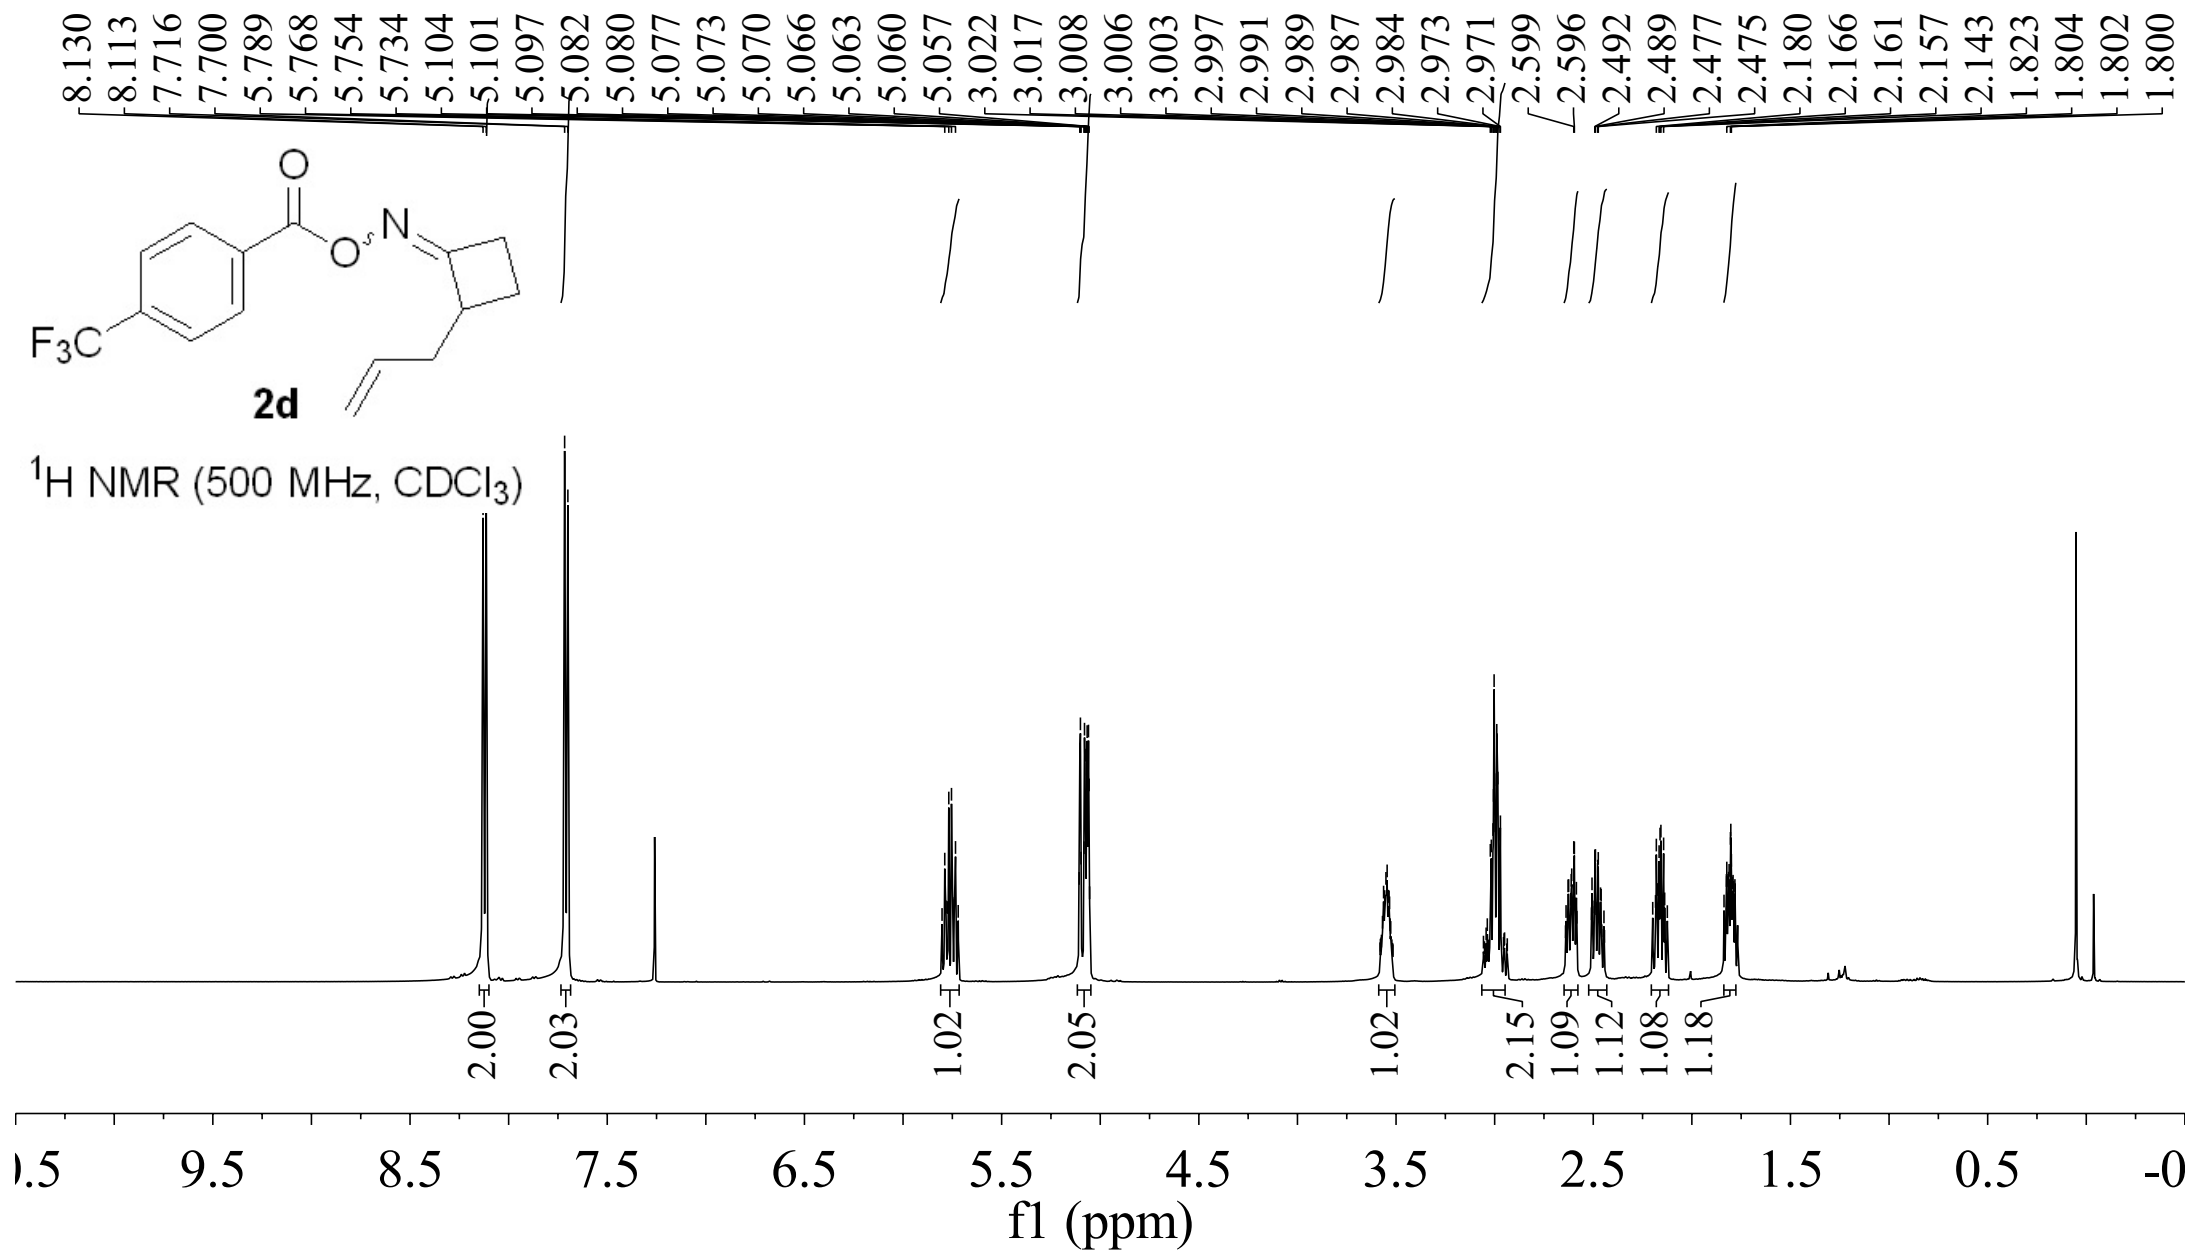

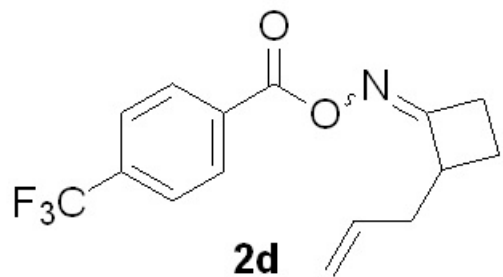

$^{13}\text{C}$  NMR (126 MHz,  $\text{CDCl}_3$ )

-171.529  
 -162.942  
 -135.132  
 -134.871  
 -134.611  
 -134.350  
 -134.099  
 -132.401  
 -130.019  
 -126.839  
 -125.709  
 -125.679  
 -125.650  
 -125.620  
 -124.671  
 -122.501  
 -120.332  
 -117.686

-45.303  
 -35.405  
 -28.884  
 -19.160

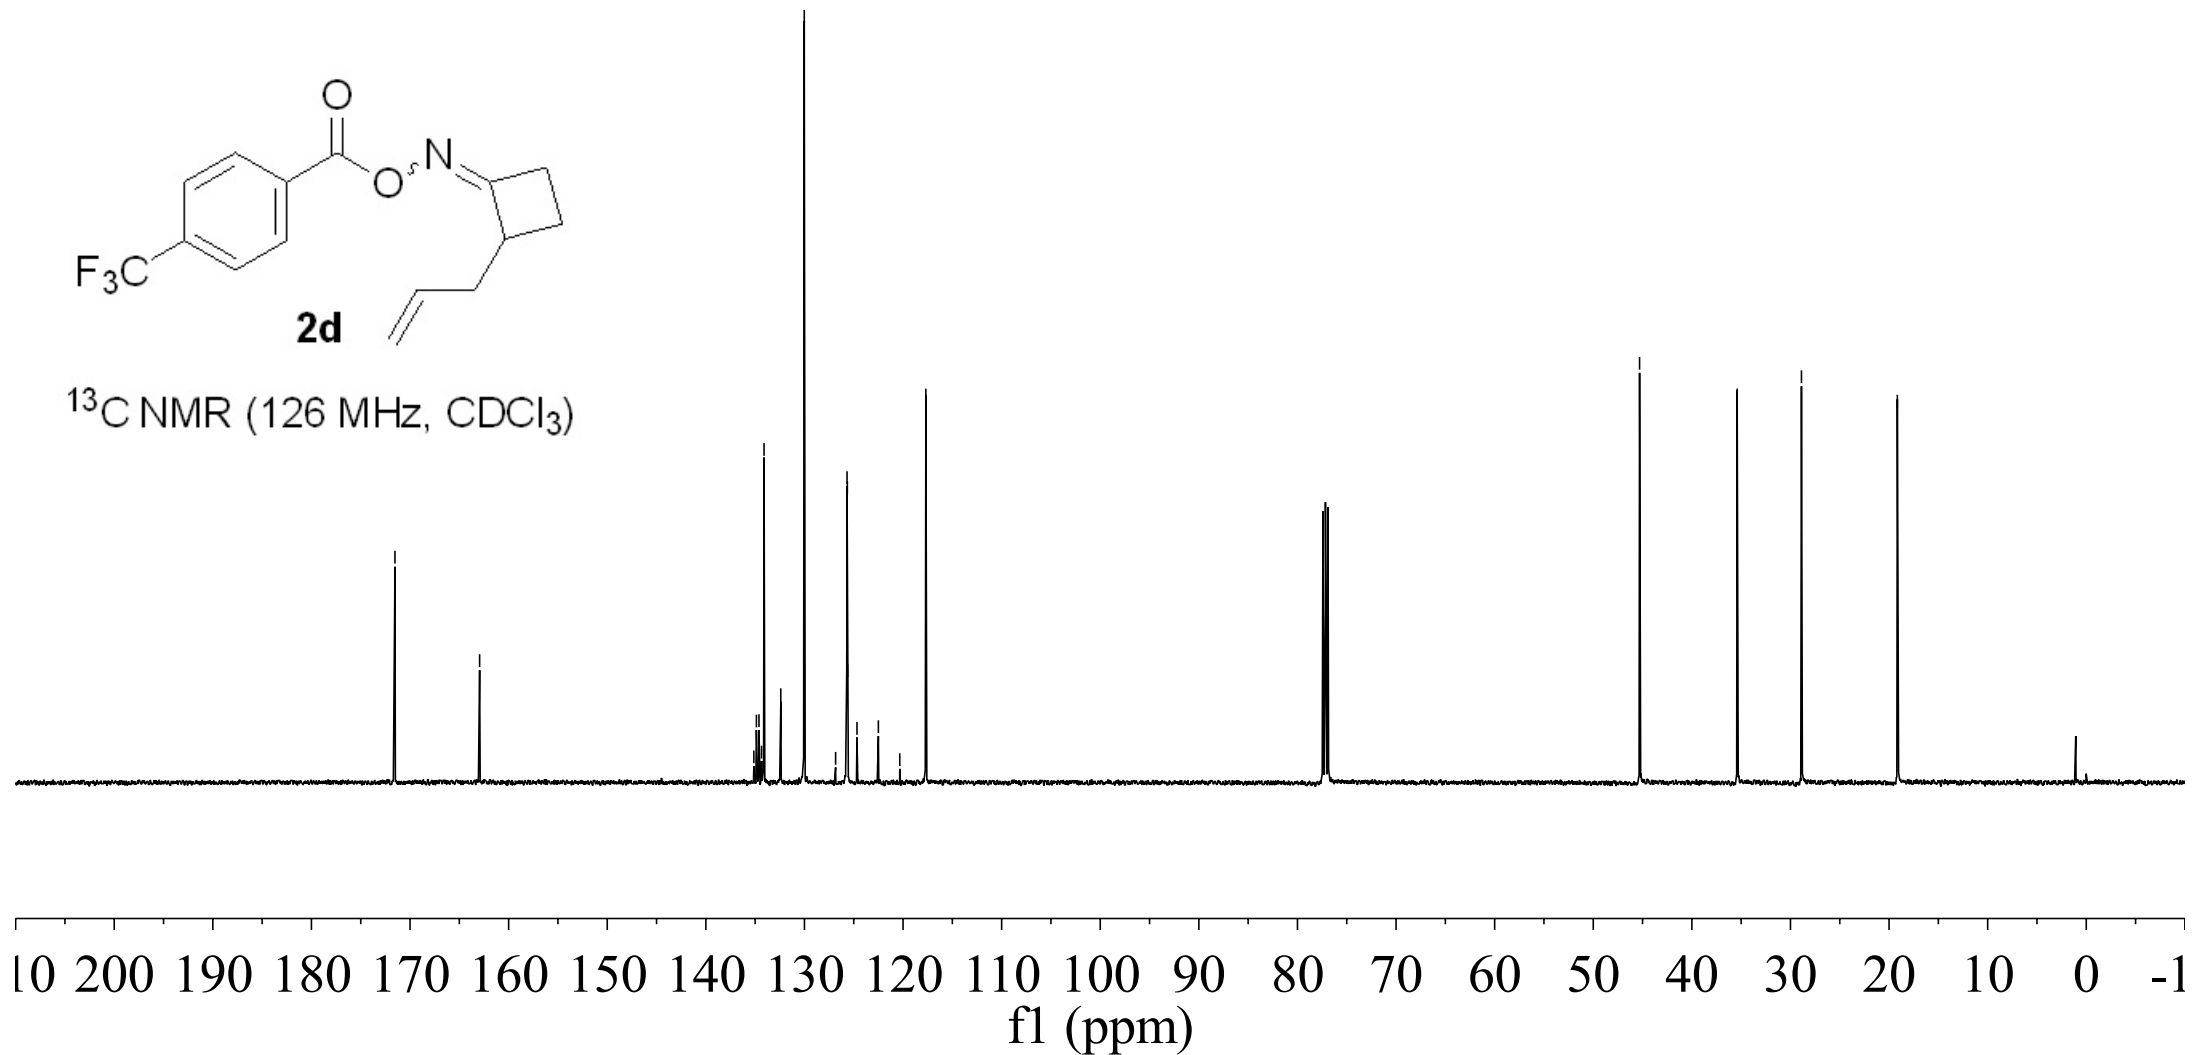

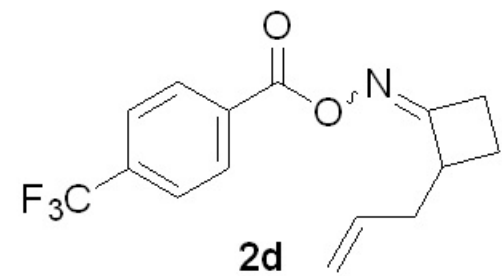

$^{19}\text{F}$  NMR (471 MHz,  $\text{CDCl}_3$ )

-63.238

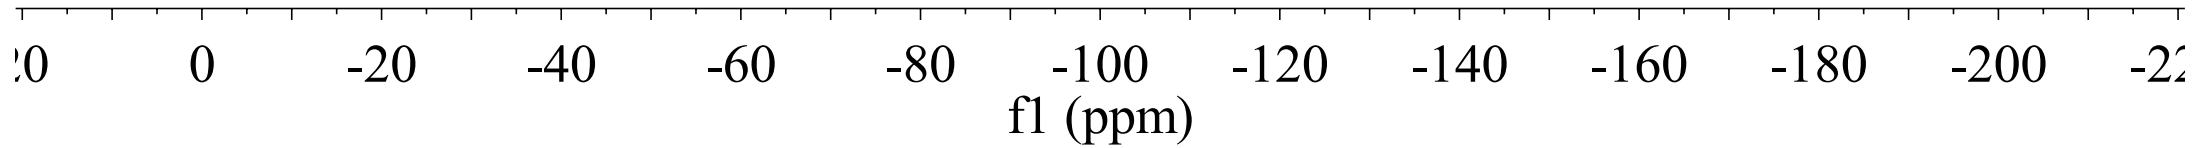

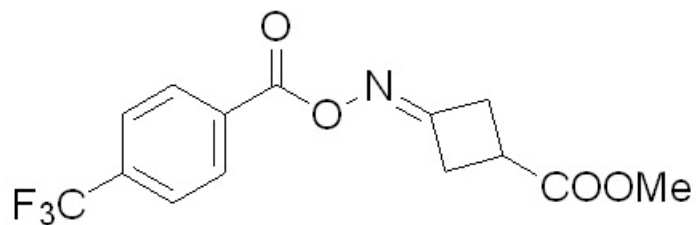

**2e**

<sup>1</sup>H NMR (500 MHz, CDCl<sub>3</sub>)

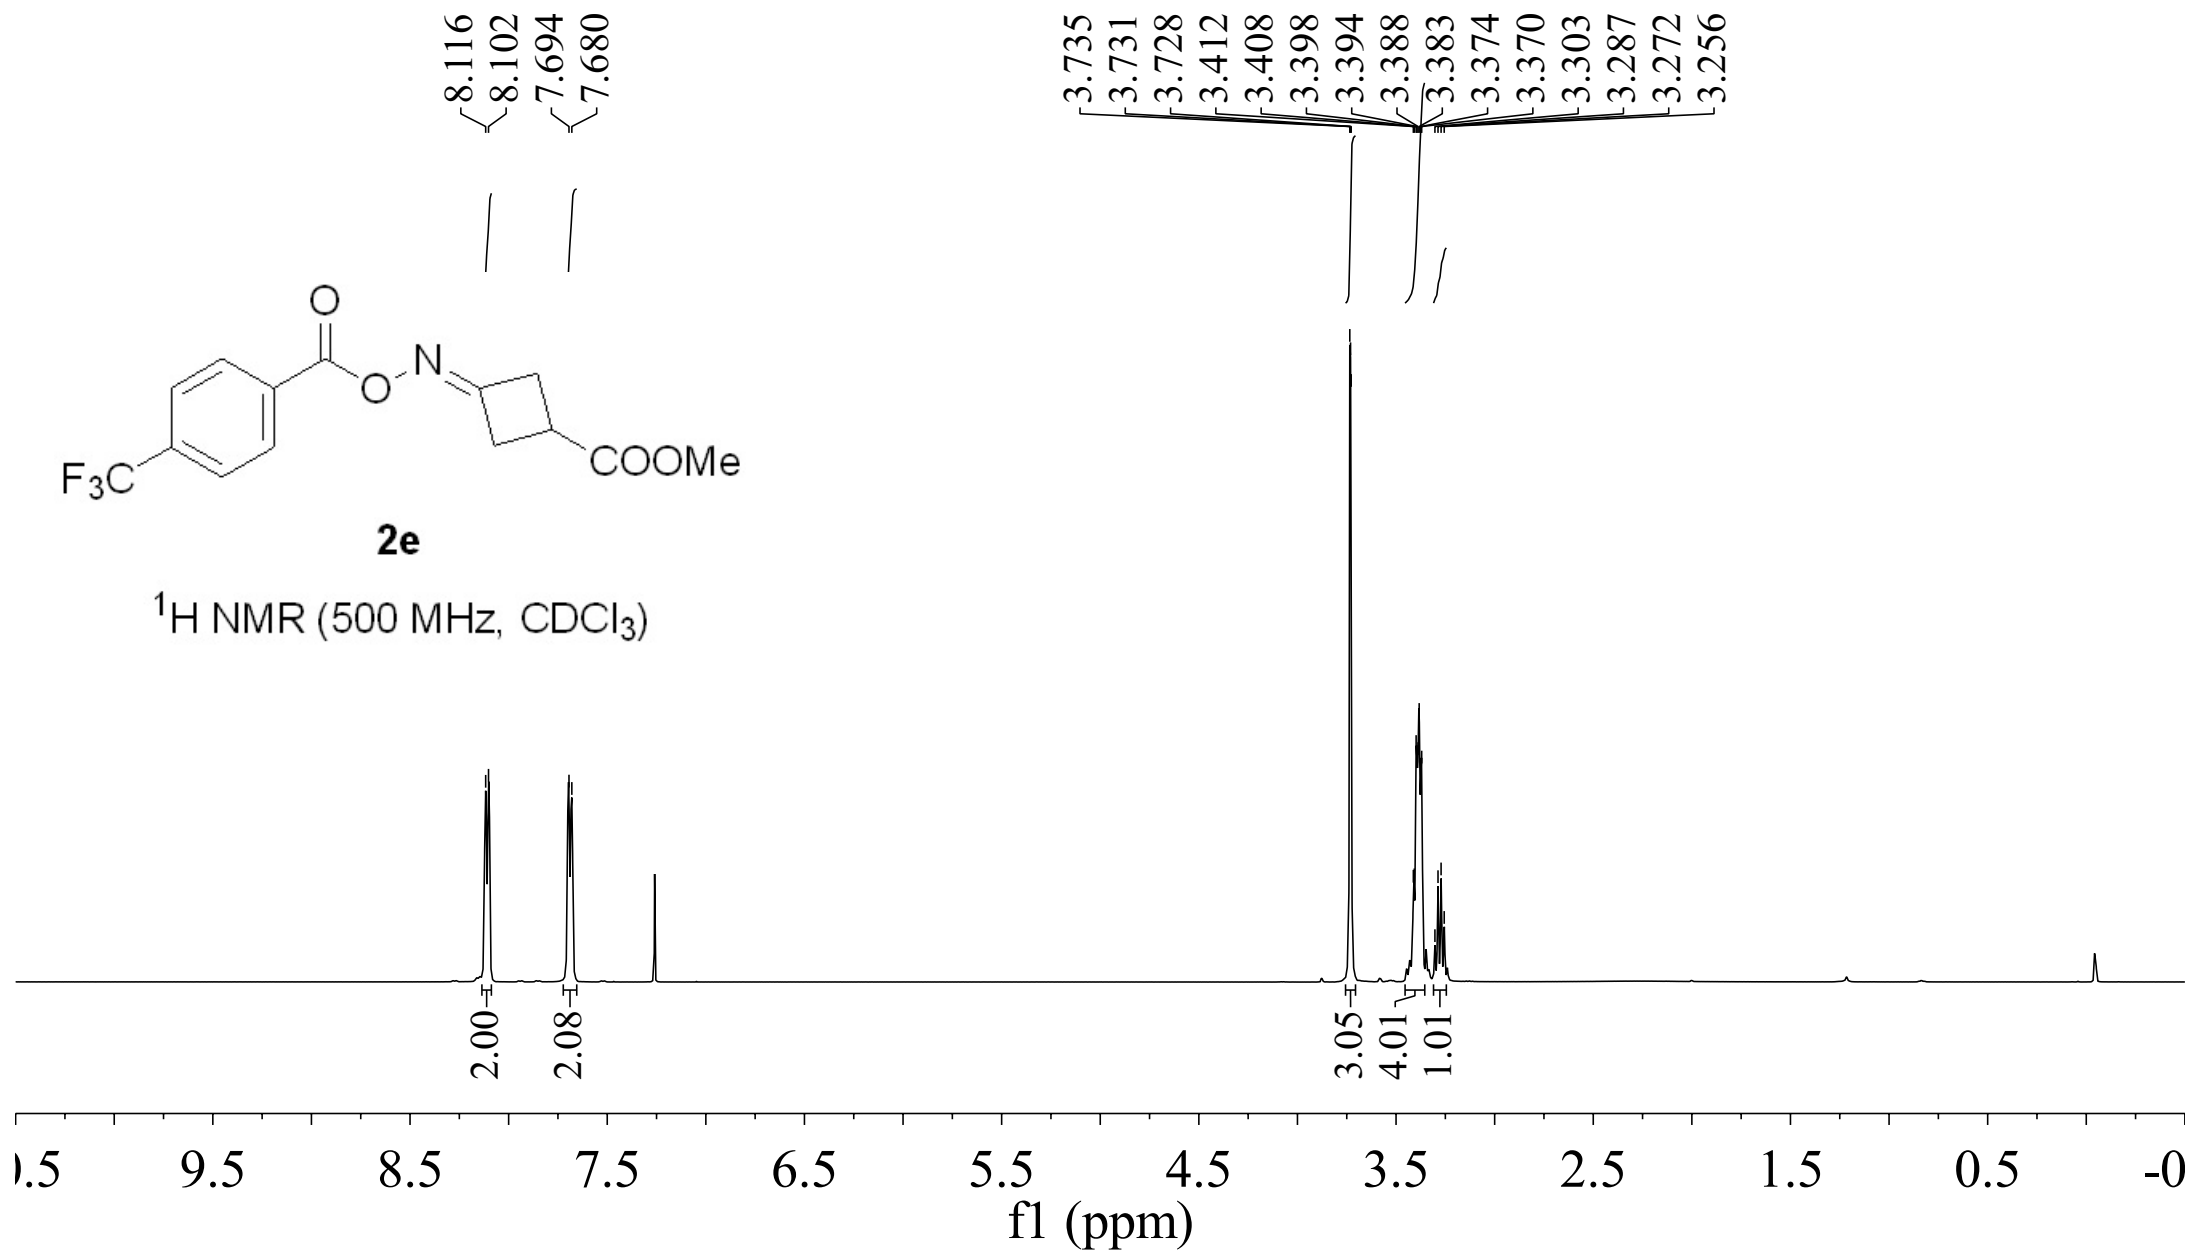



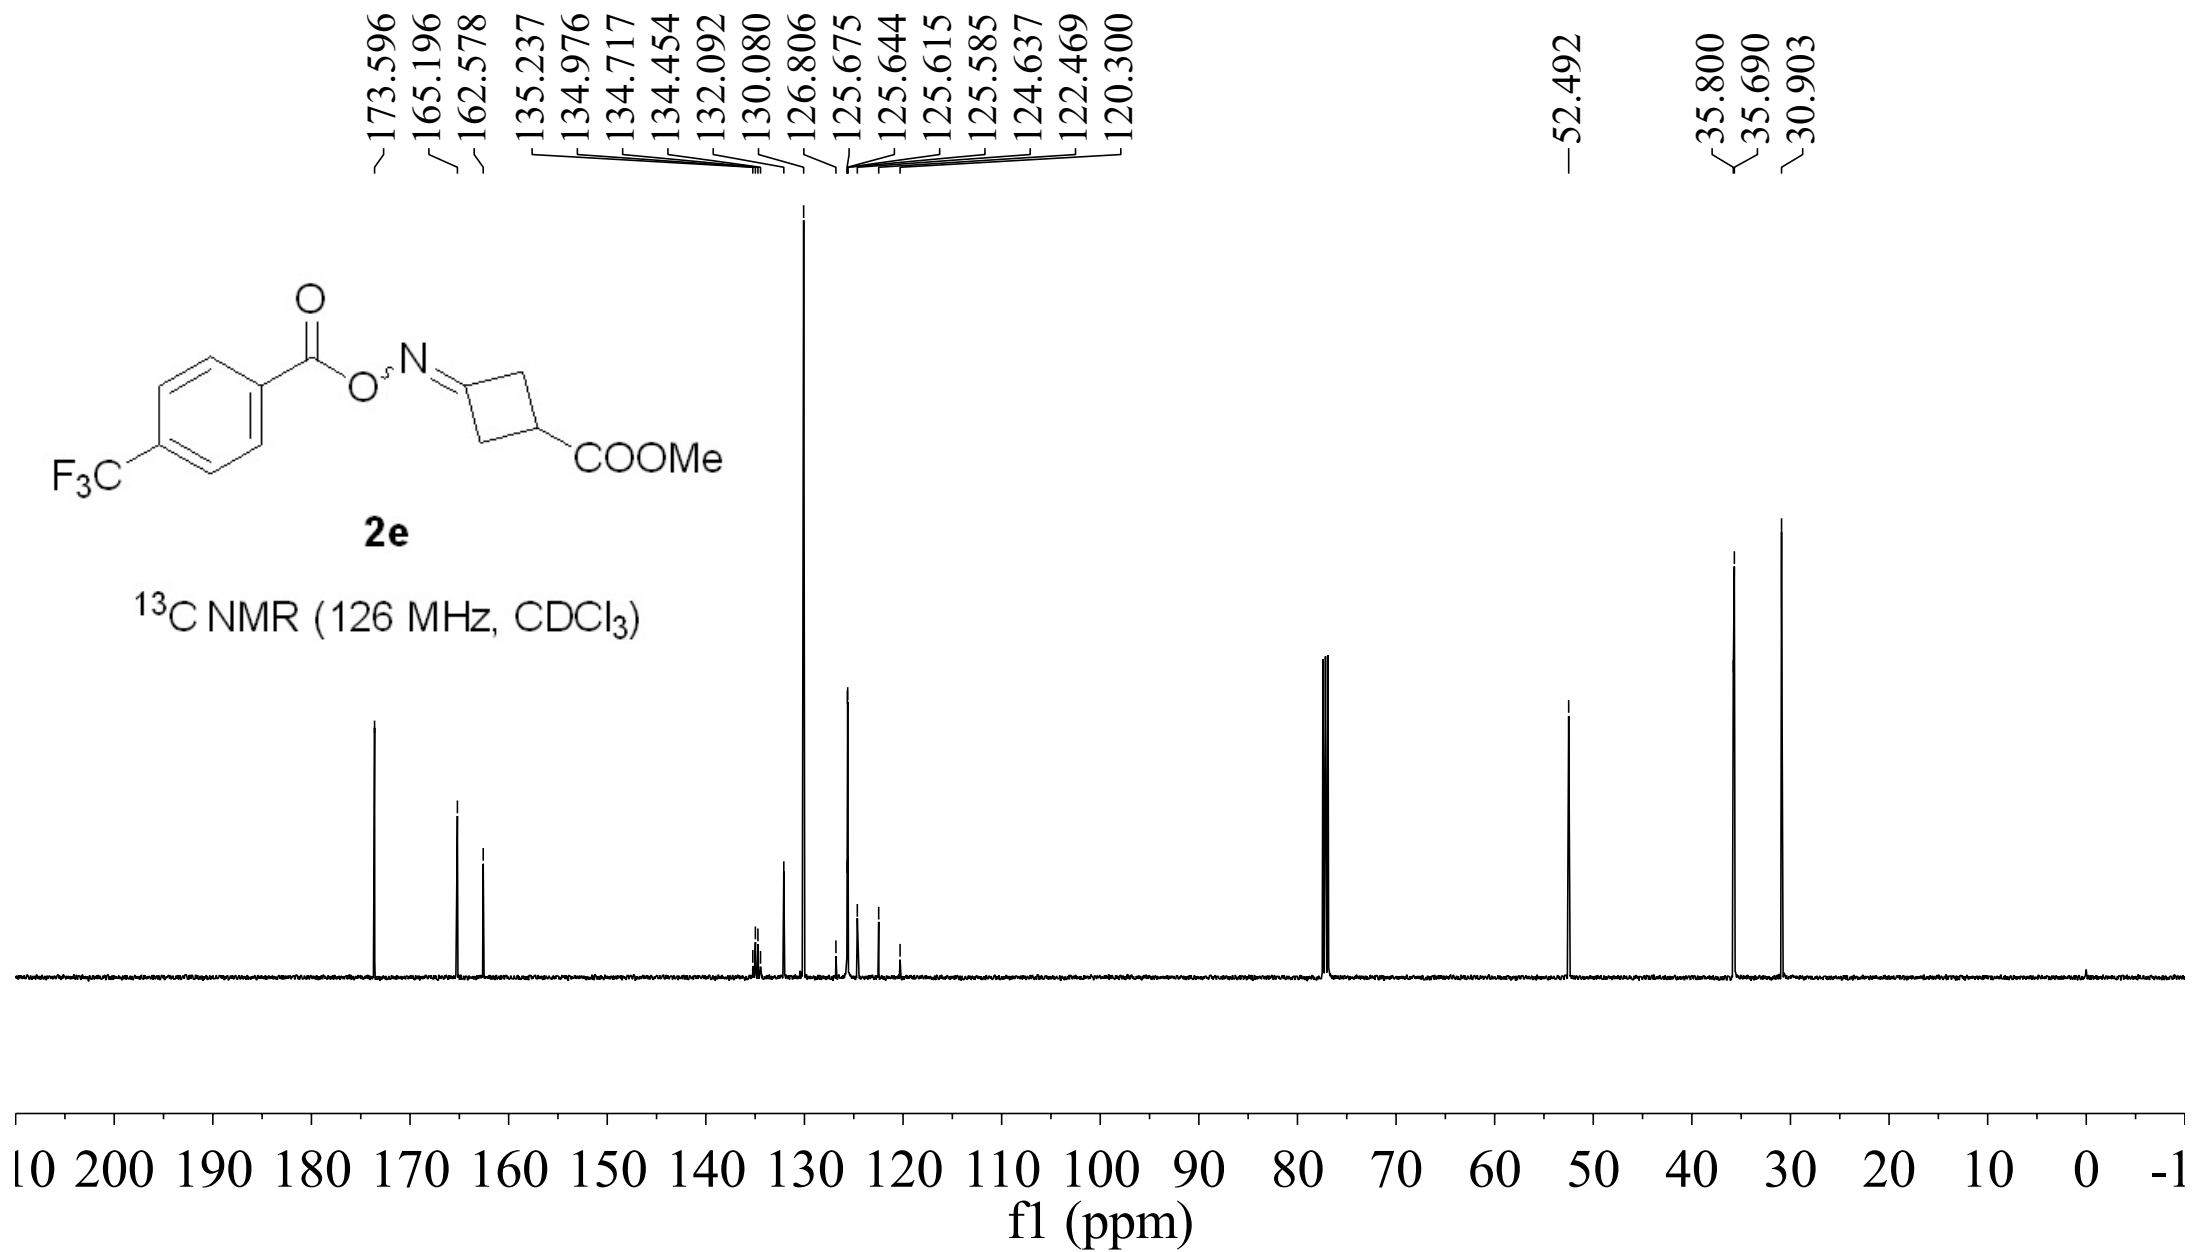

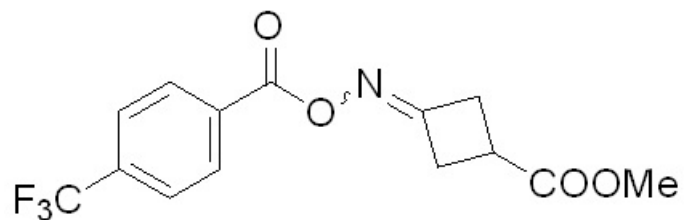

**2e**

$^{19}\text{F}$  NMR (471 MHz,  $\text{CDCl}_3$ )

--63.276

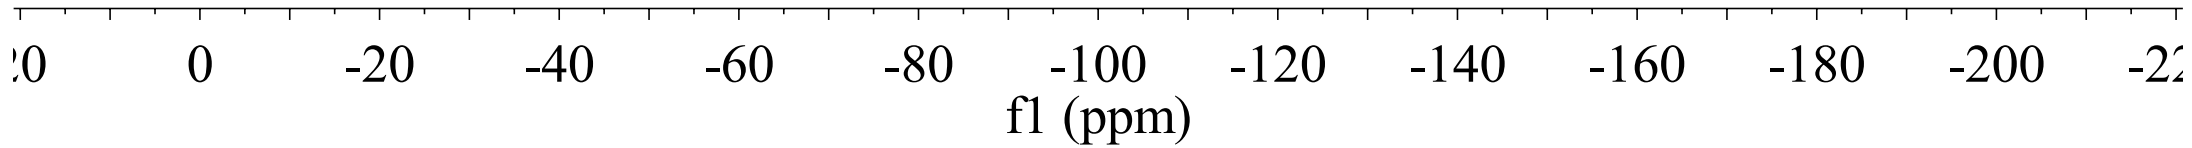

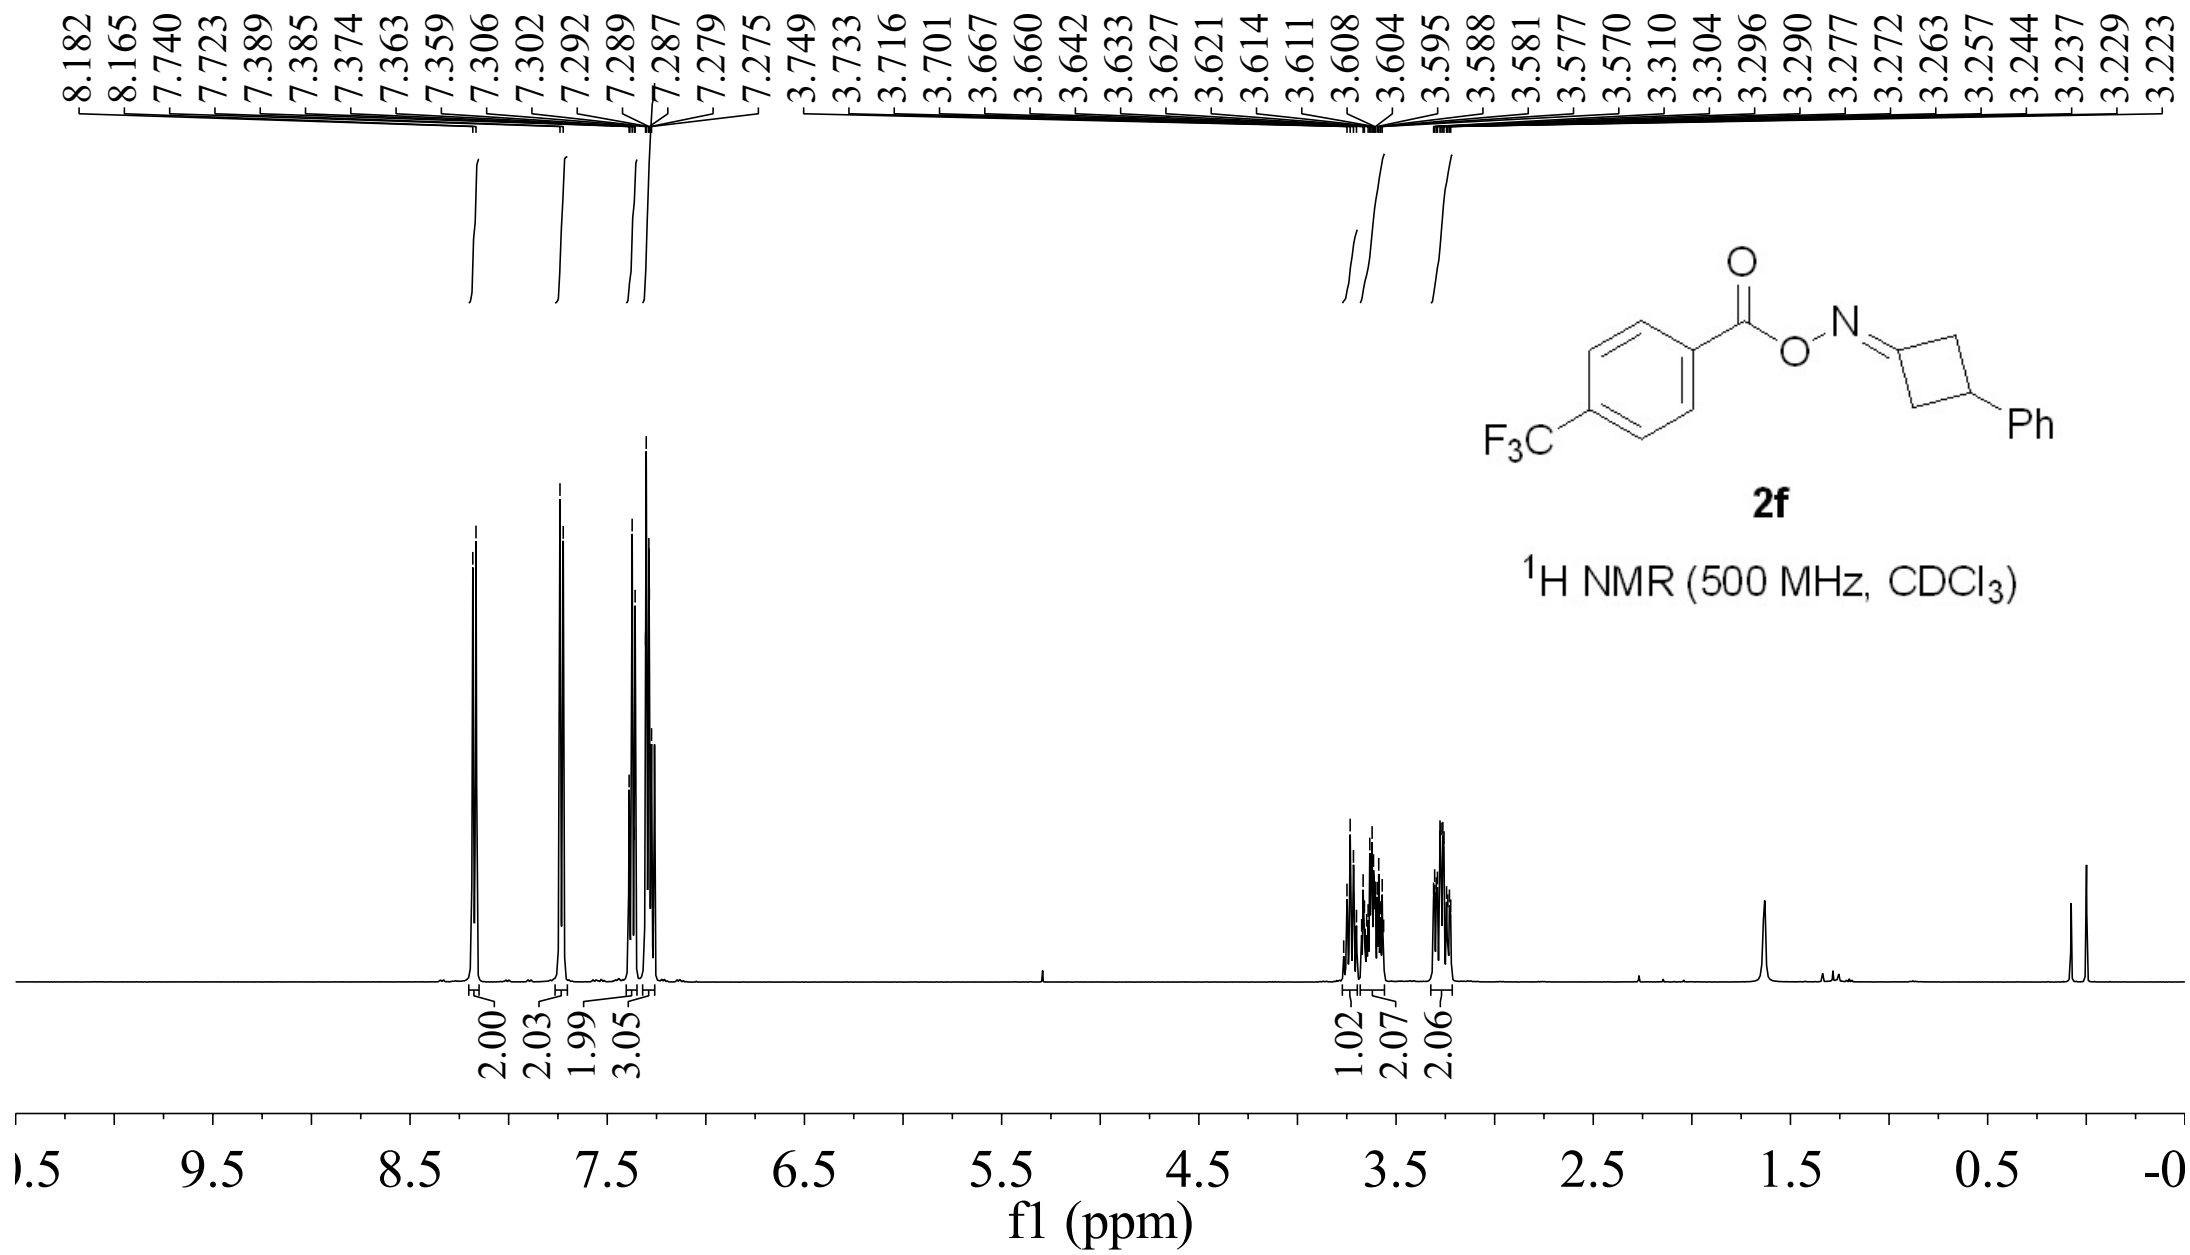

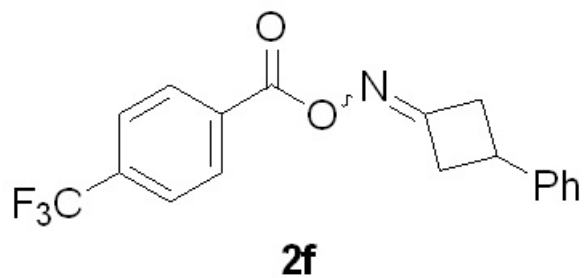

$^{13}\text{C}$  NMR (126 MHz,  $\text{CDCl}_3$ )

~166.911  
~162.913  
142.929  
135.259  
134.999  
134.739  
134.478  
132.385  
130.152  
128.908  
127.118  
126.903  
126.427  
125.730  
125.701  
125.672  
125.641  
124.734  
122.565  
120.397

~39.650  
~39.605  
~32.614

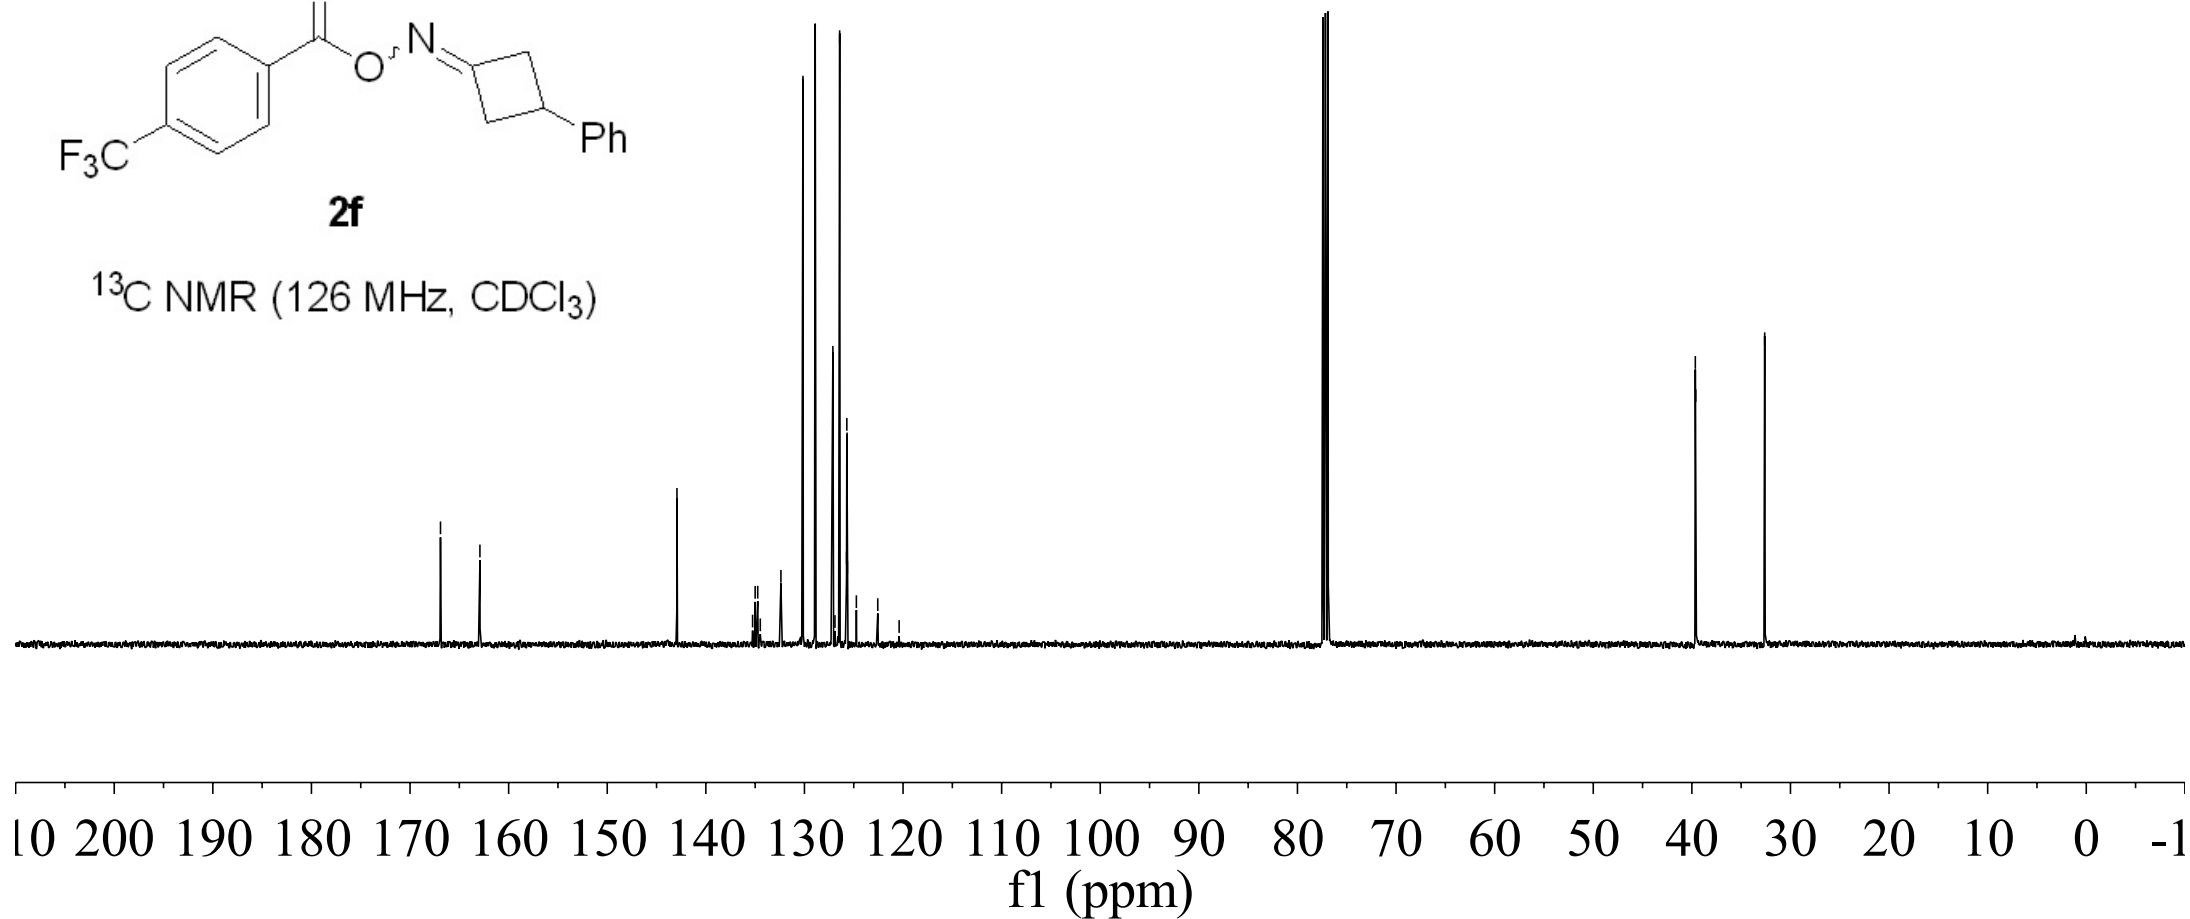

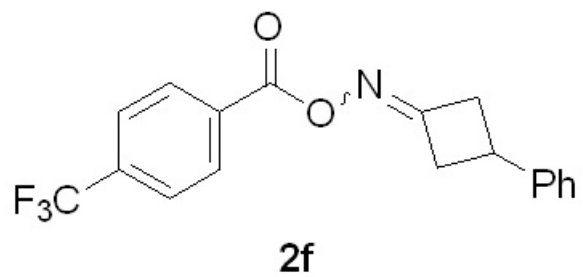

<sup>19</sup>F NMR (471 MHz, CDCl<sub>3</sub>)

—63.165

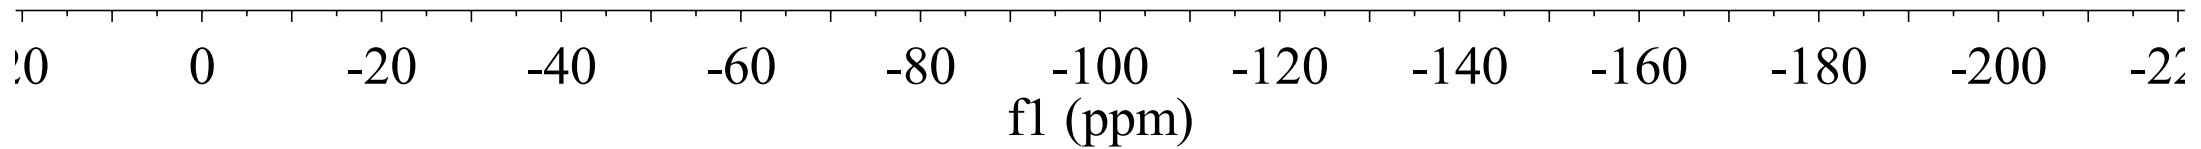

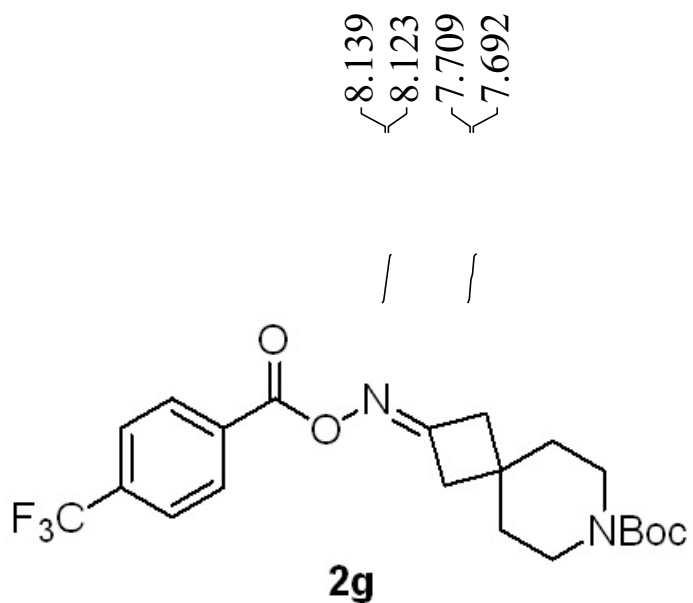

$^1\text{H NMR}$  (500 MHz,  $\text{CDCl}_3$ )

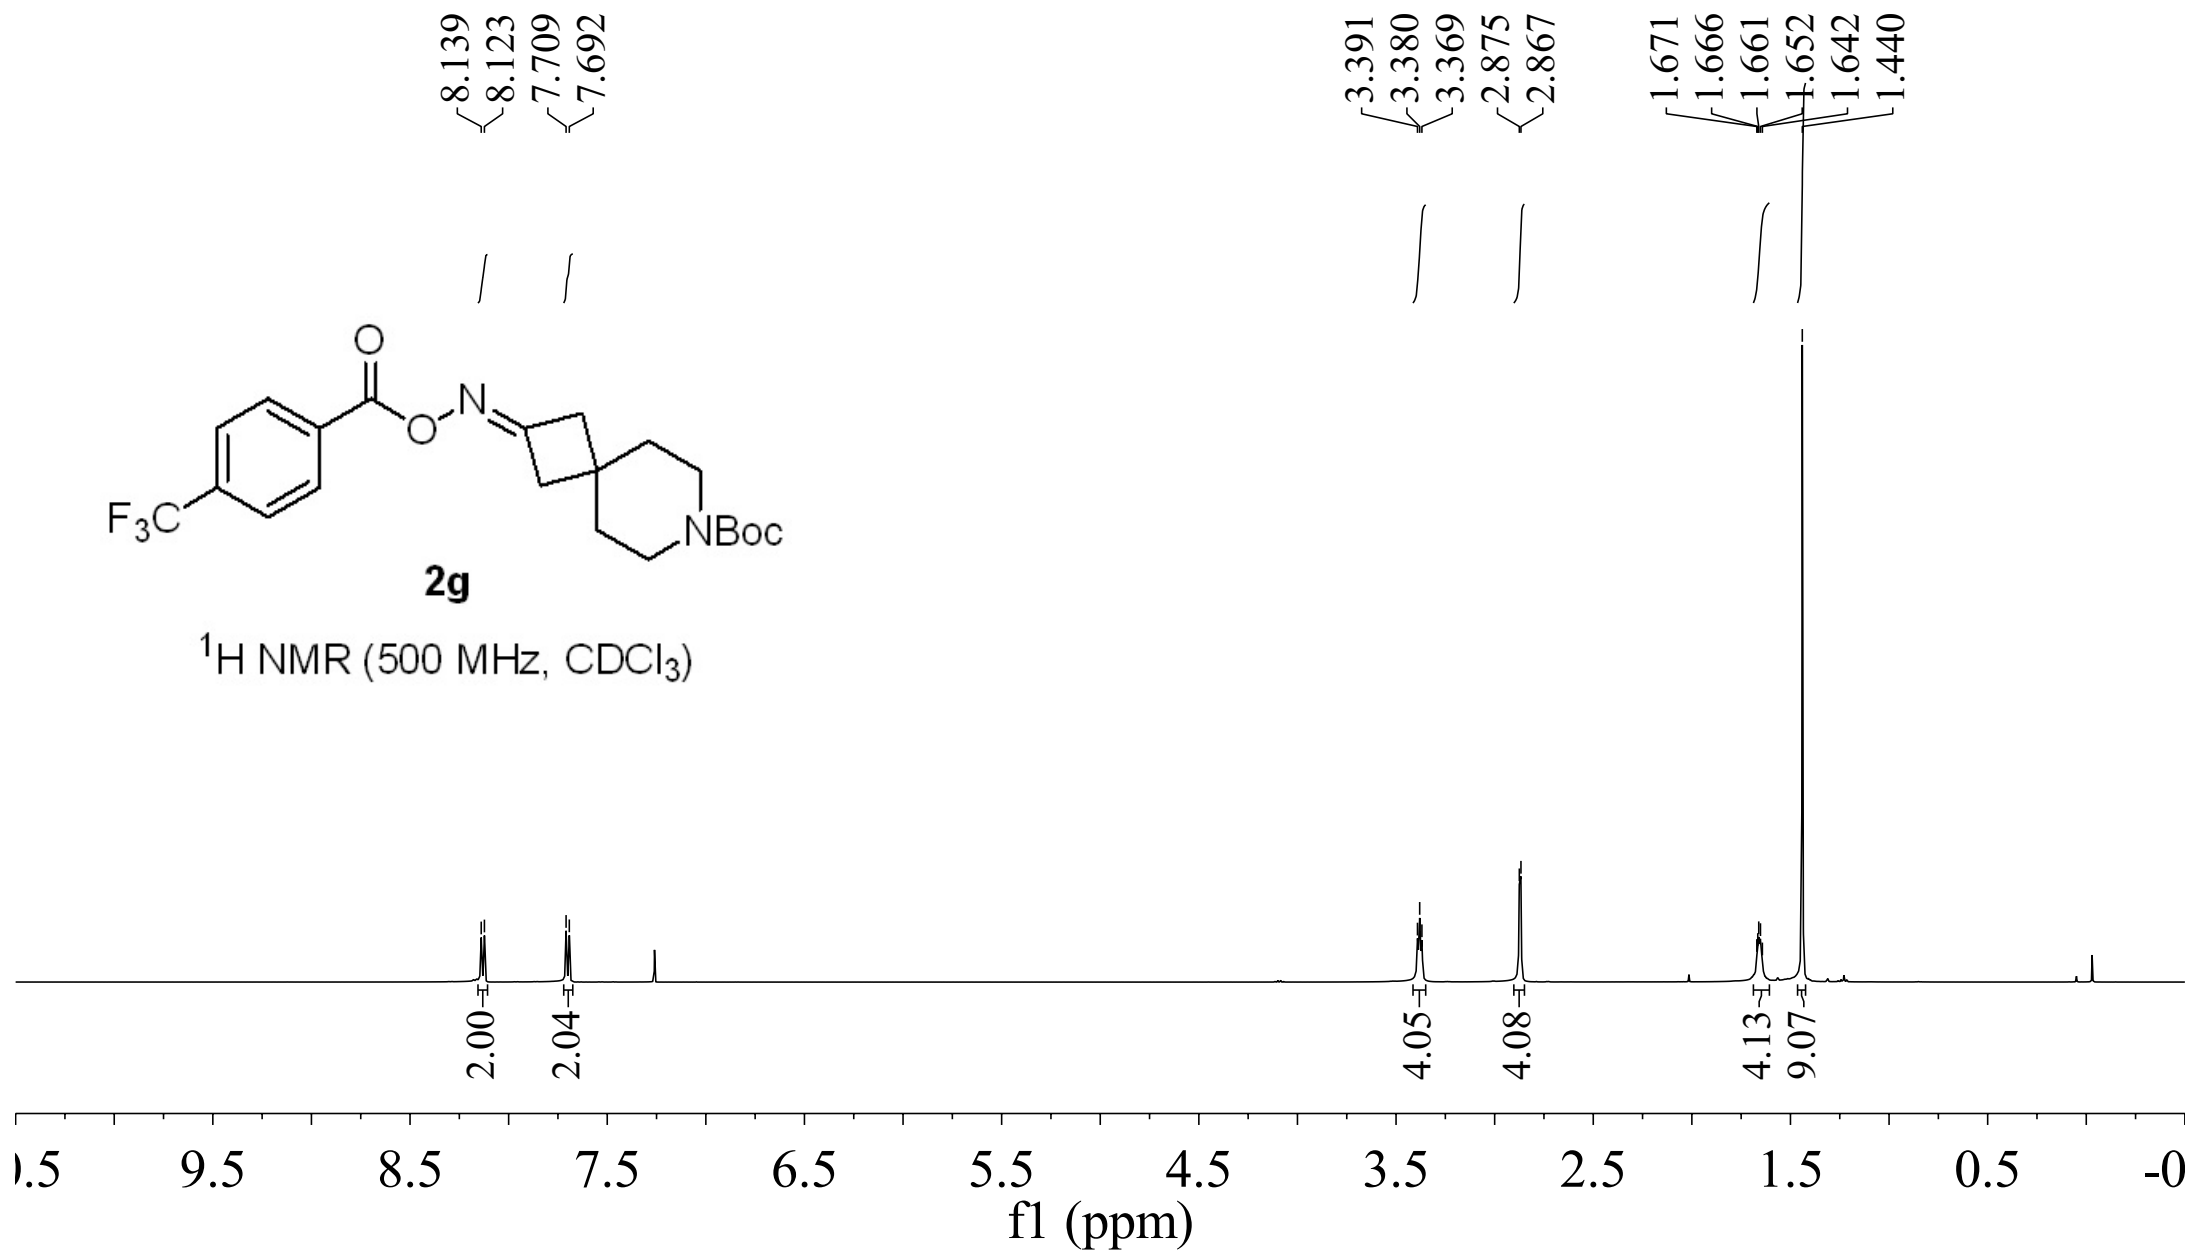

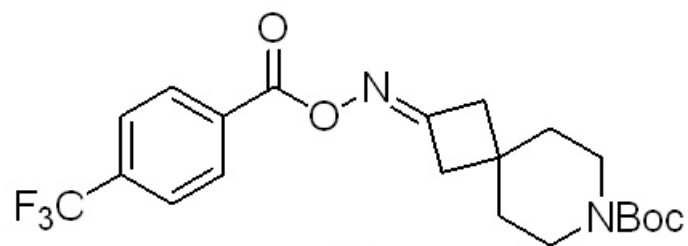

**2g**

<sup>13</sup>C NMR (126 MHz, CDCl<sub>3</sub>)

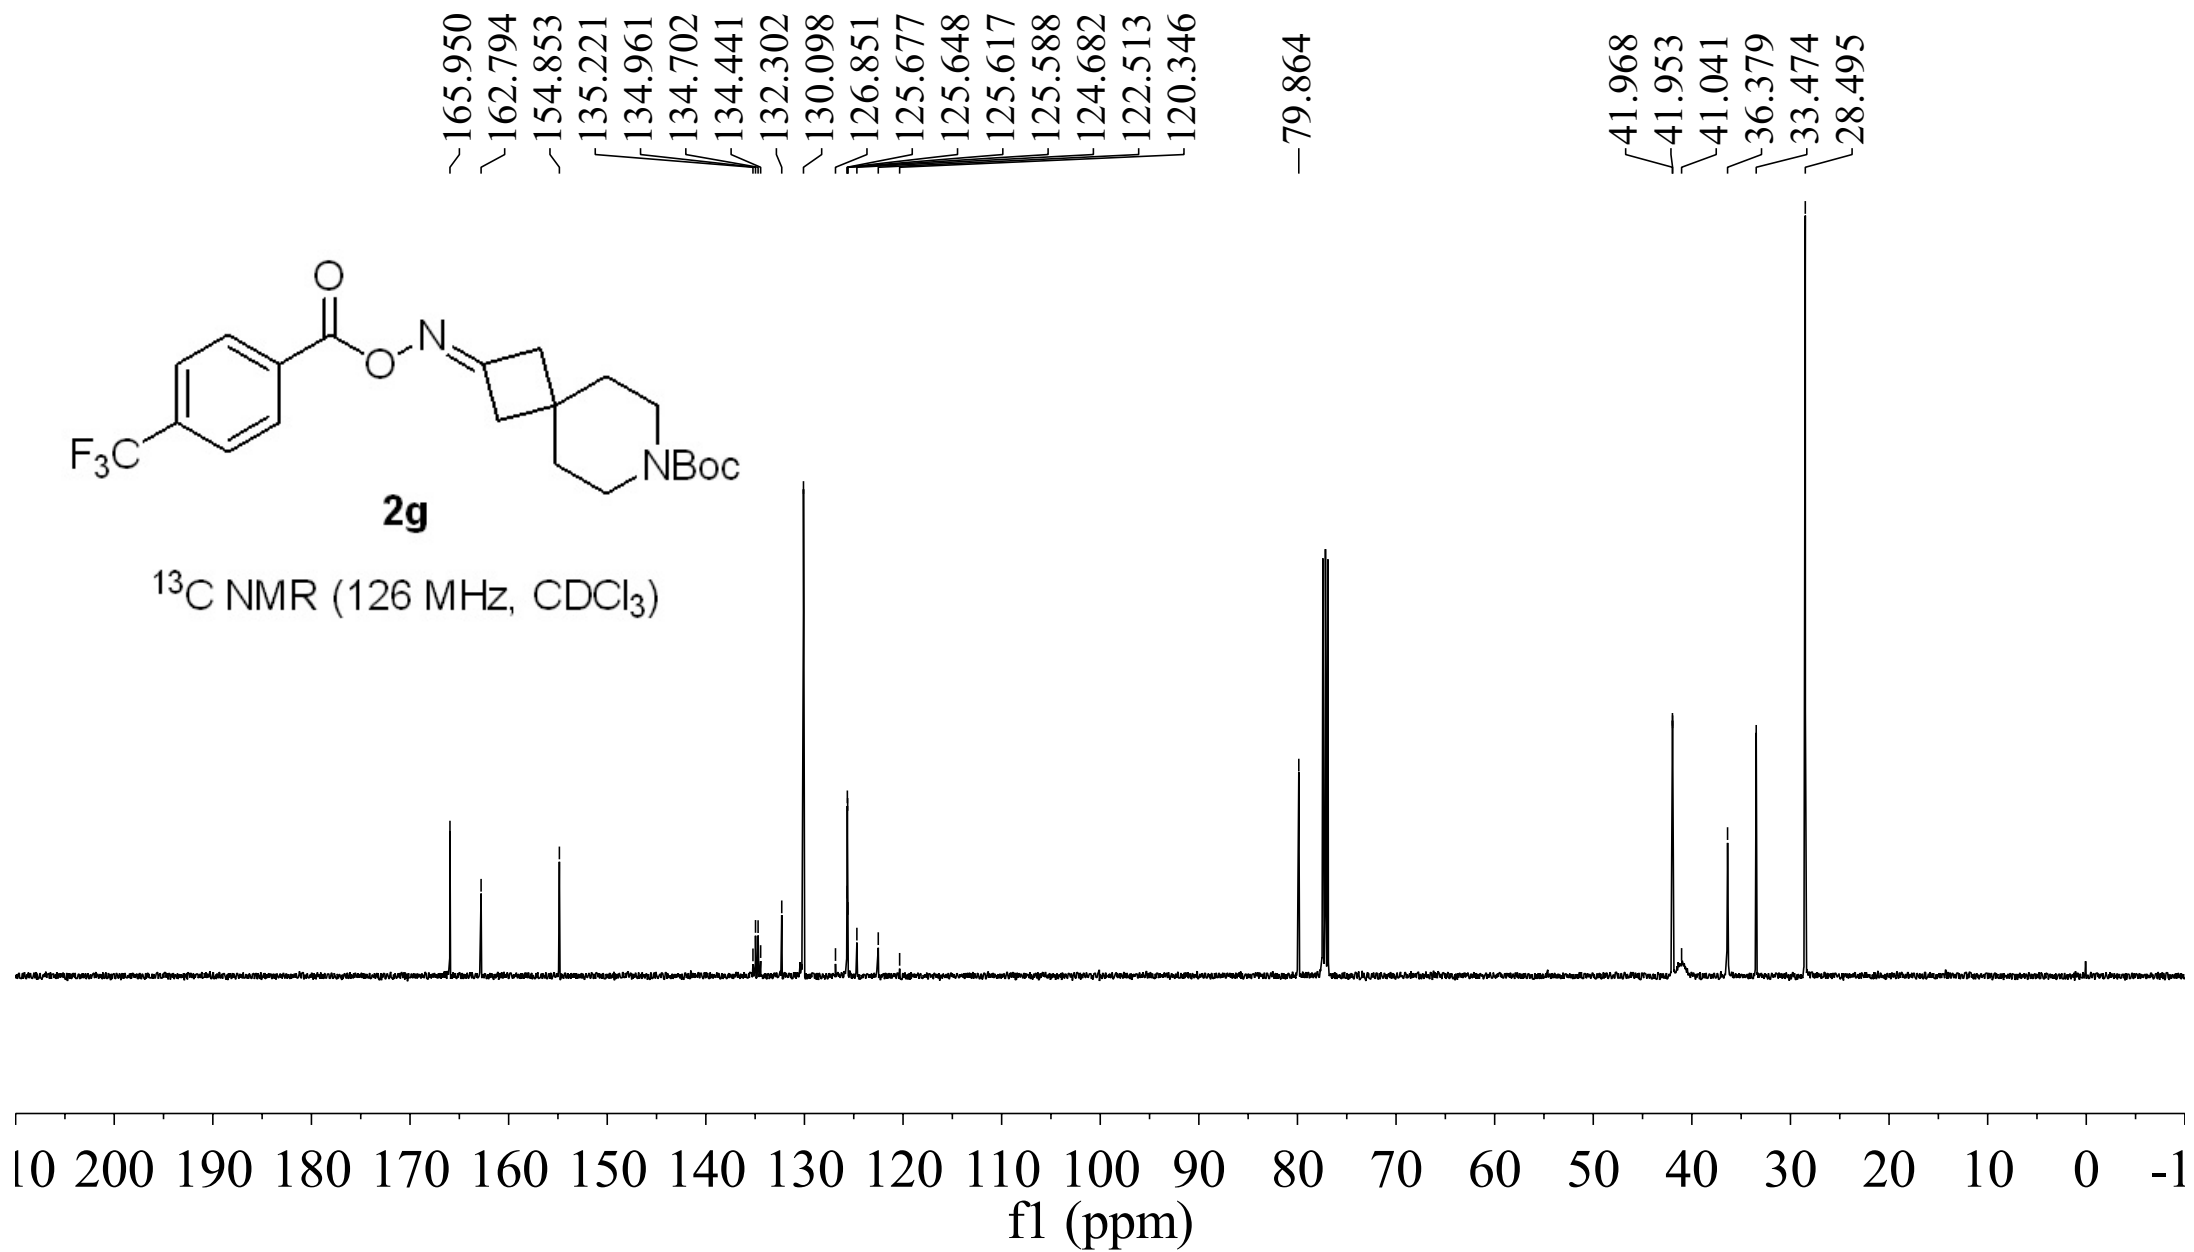

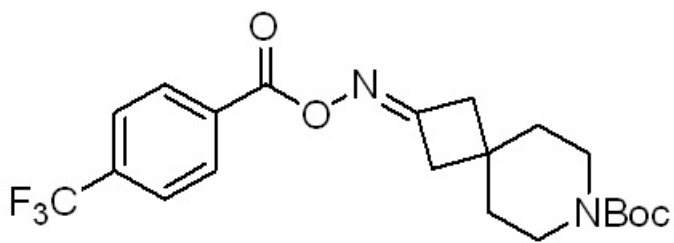

2g

$^{19}\text{F}$  NMR (471 MHz,  $\text{CDCl}_3$ )

-63.200





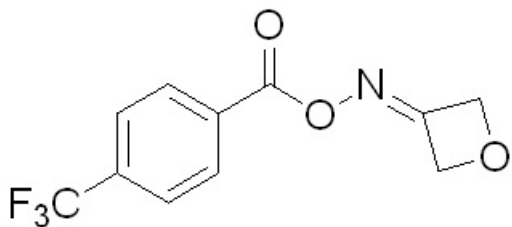

**2h**

<sup>1</sup>H NMR (500 MHz, CDCl<sub>3</sub>)

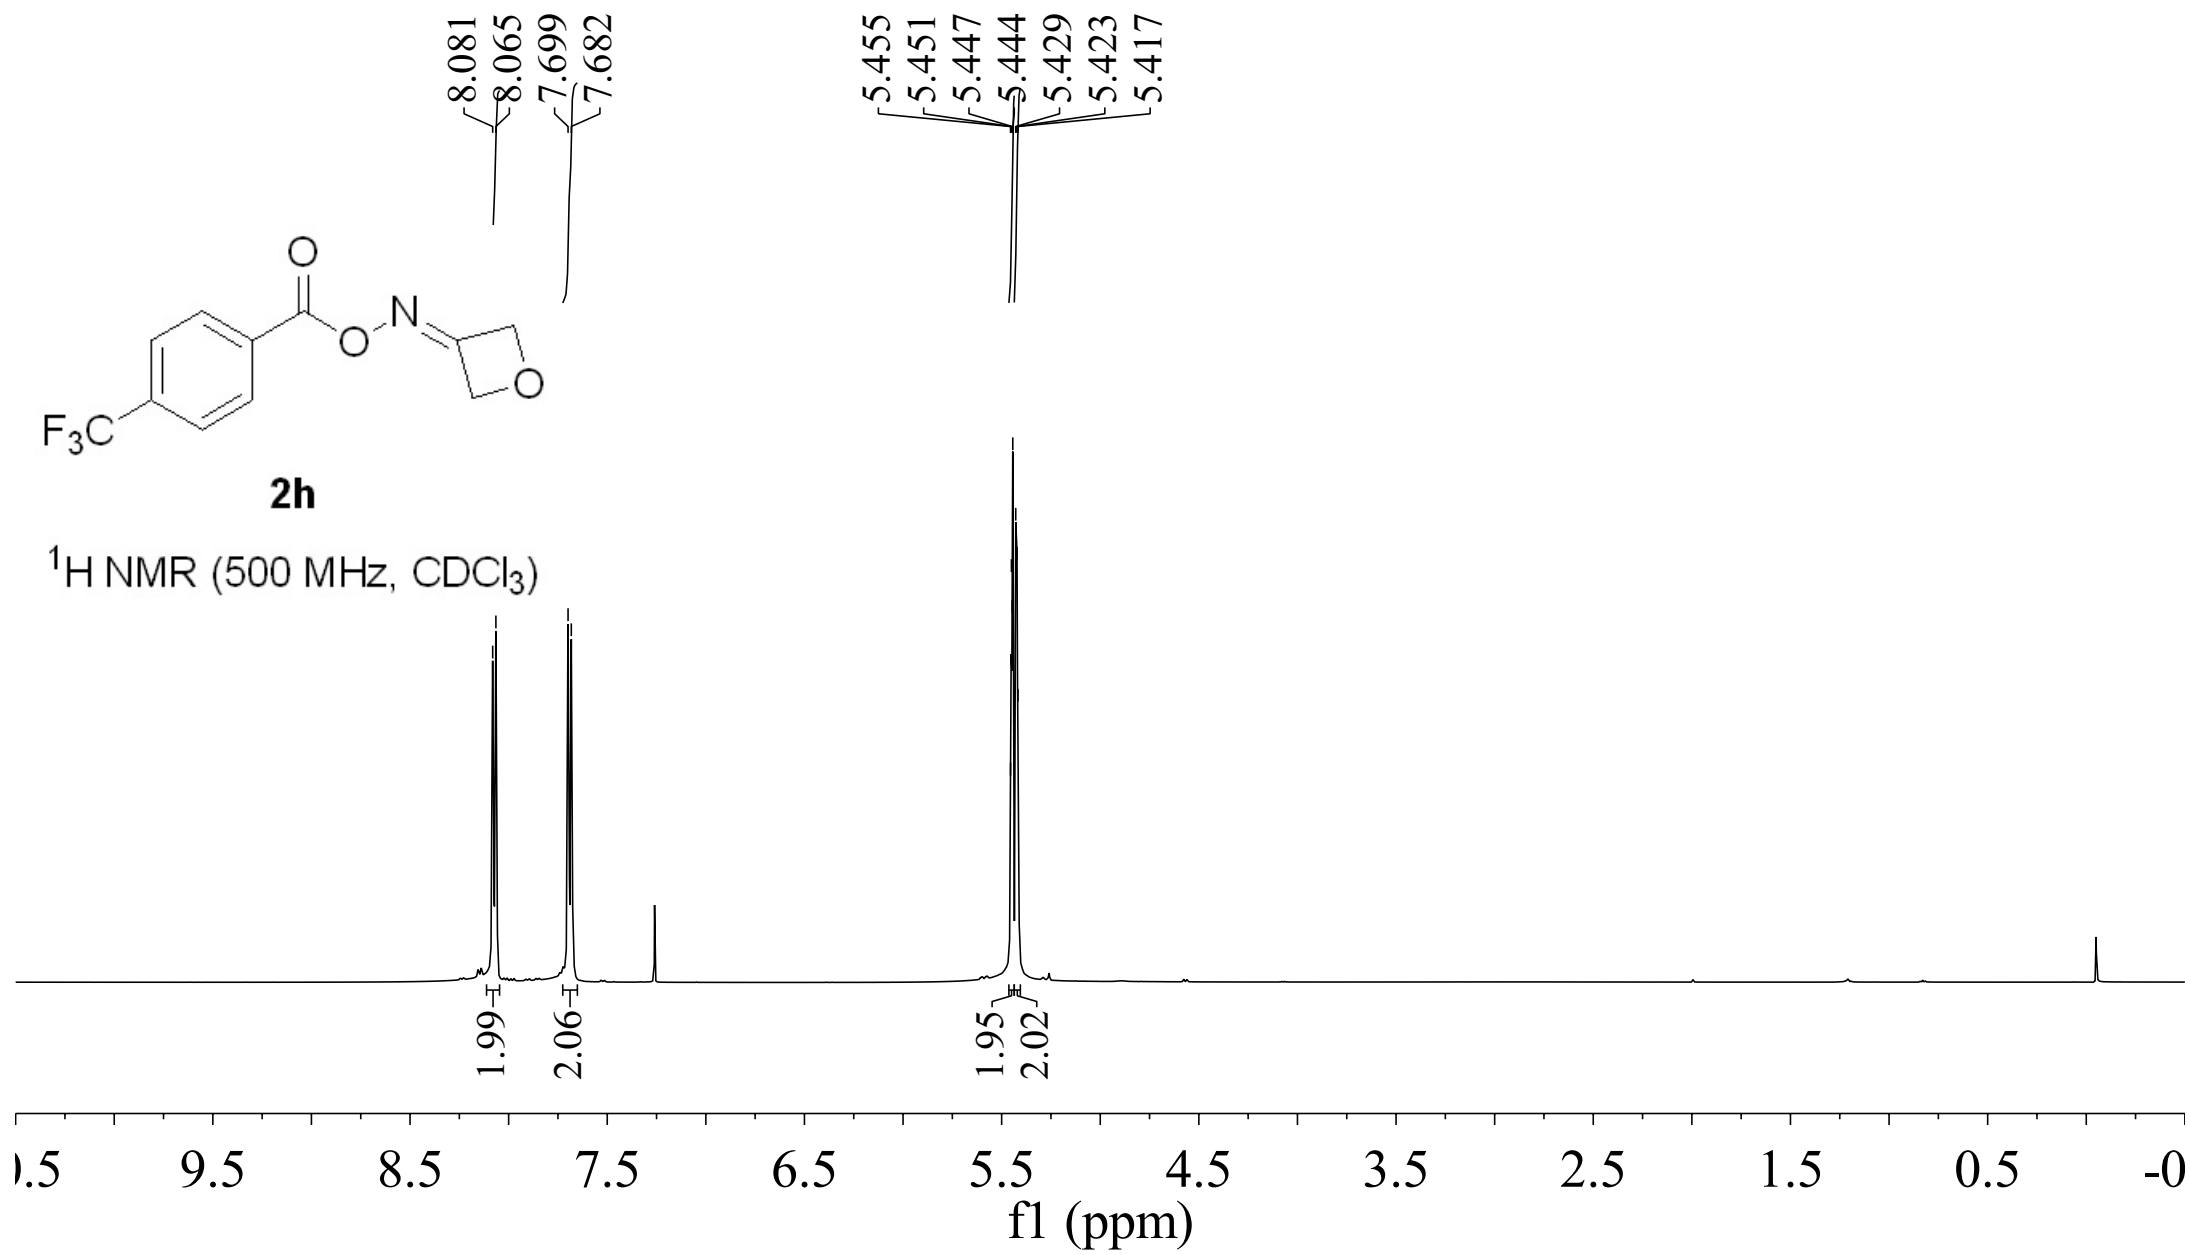

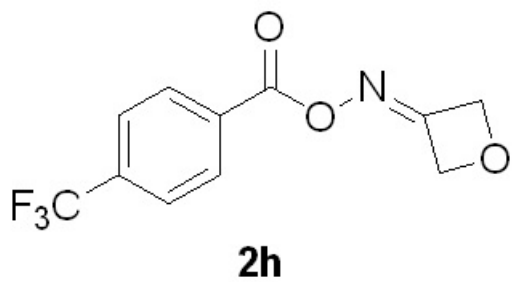

$^{13}\text{C}$  NMR (126 MHz,  $\text{CDCl}_3$ )

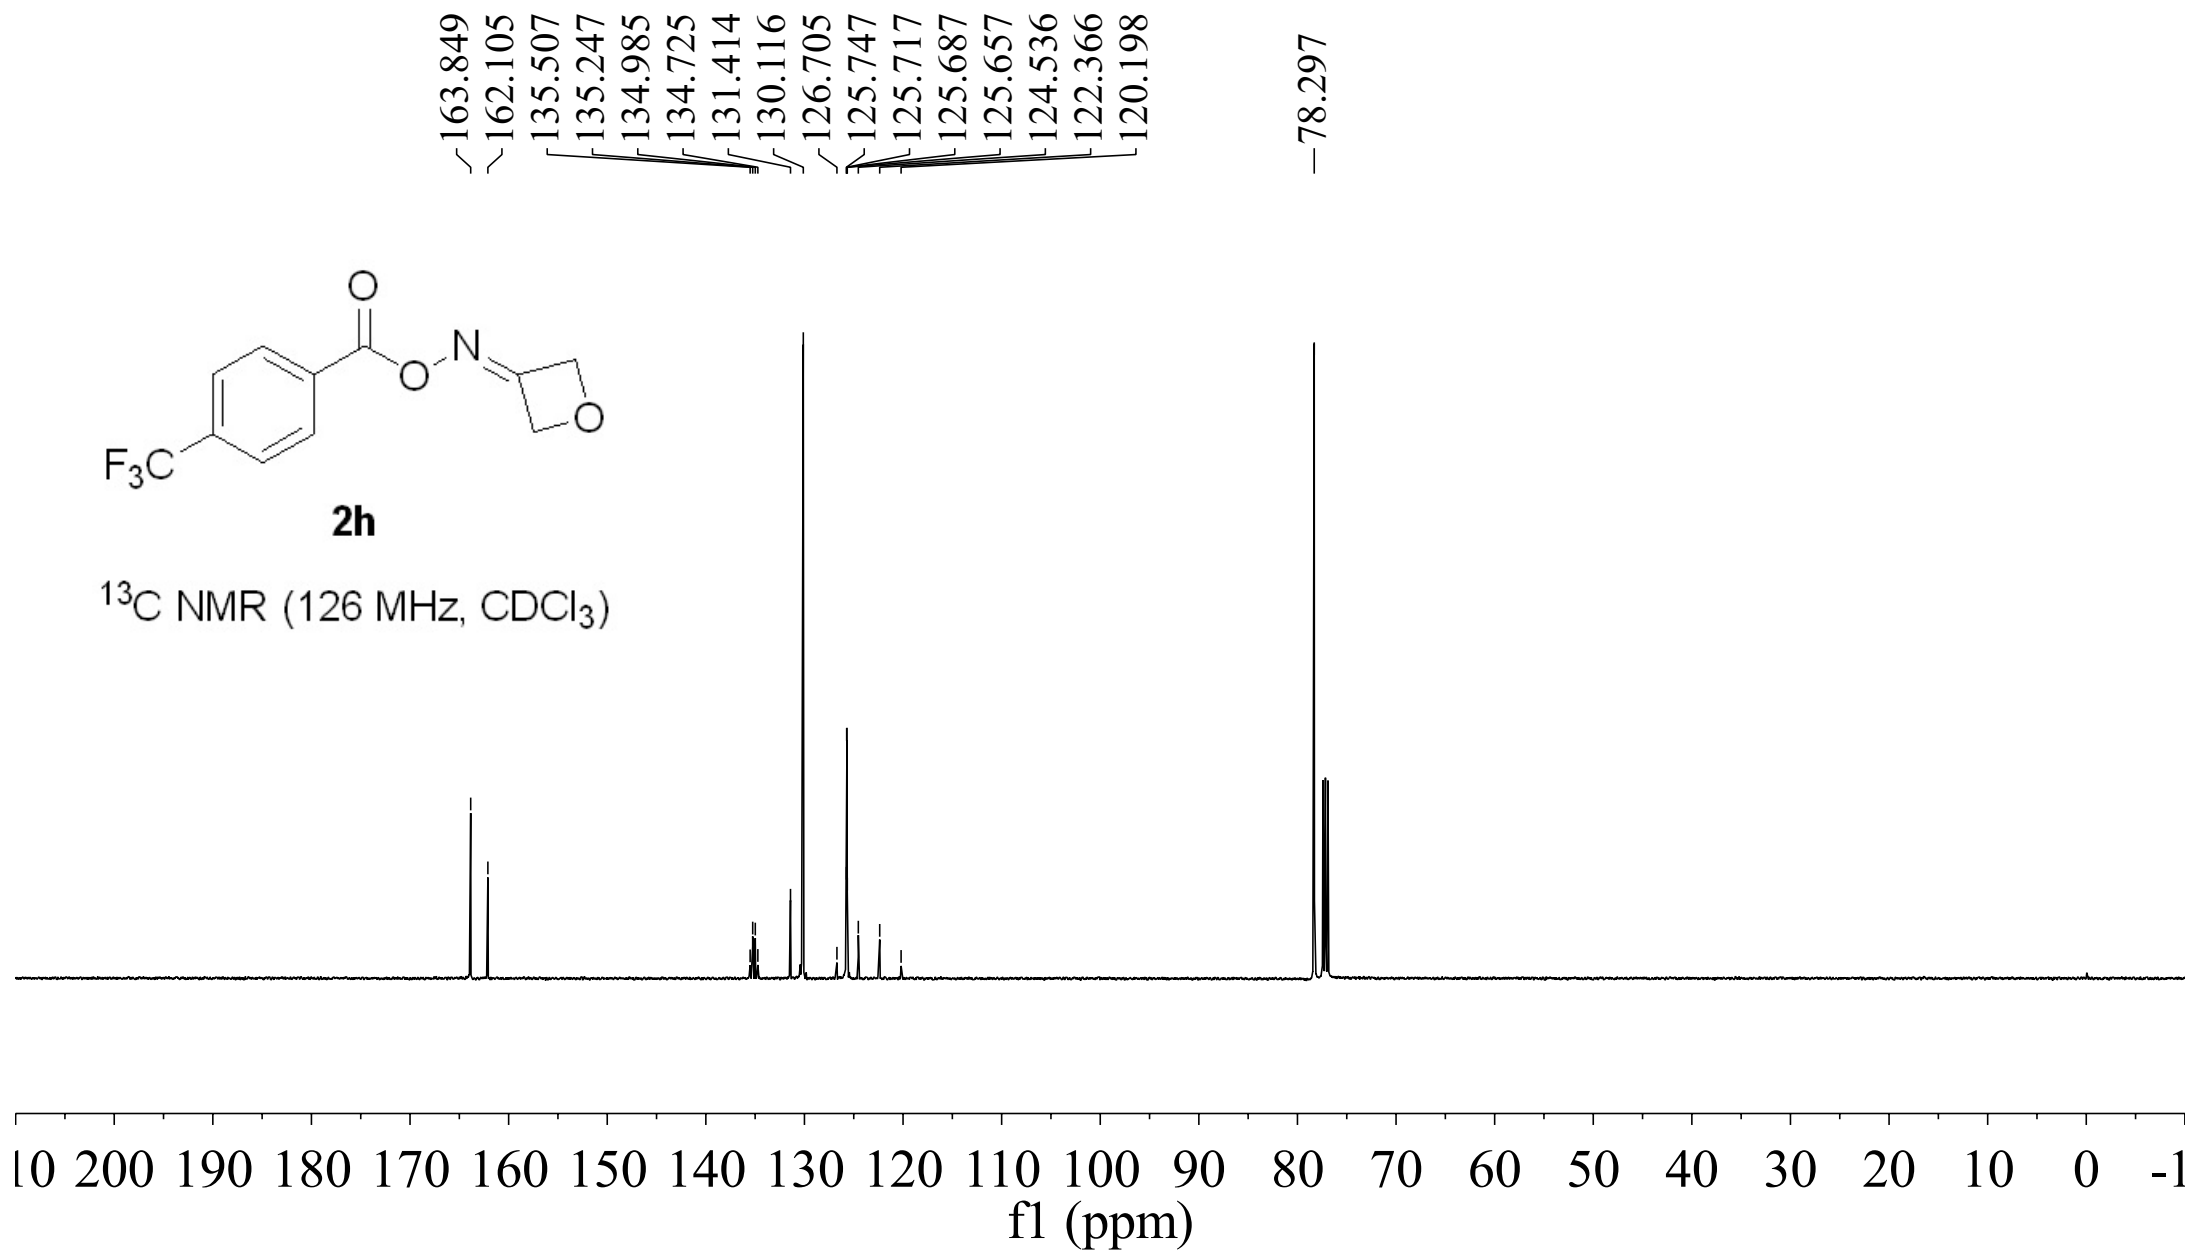

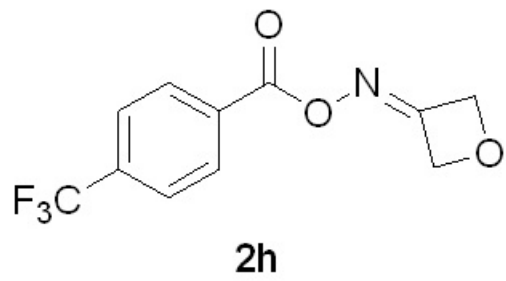

$^{19}\text{F}$  NMR (471 MHz,  $\text{CDCl}_3$ )

--63.326



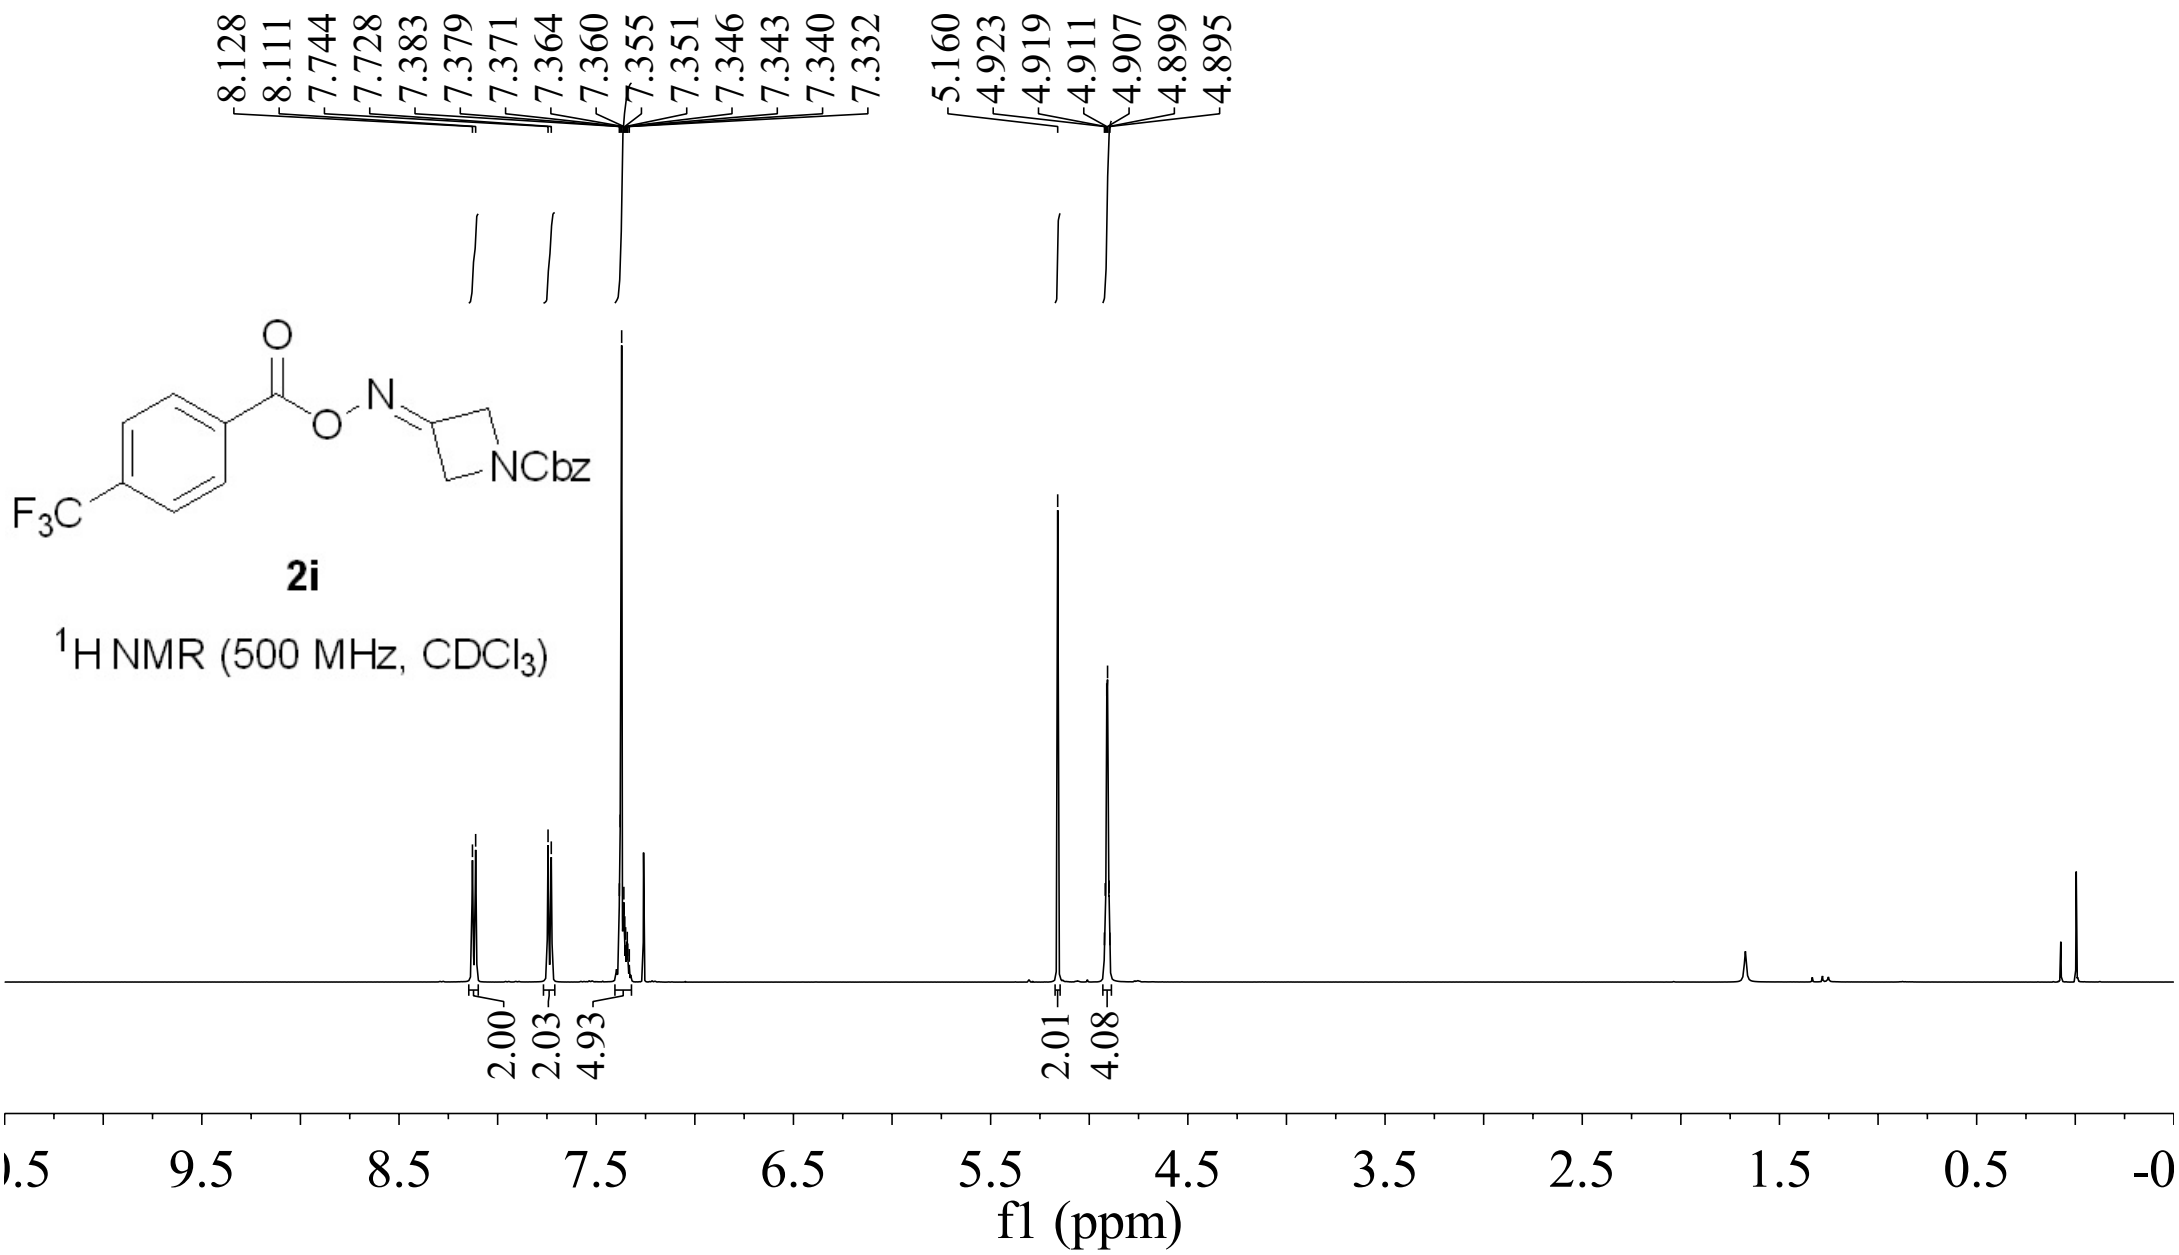

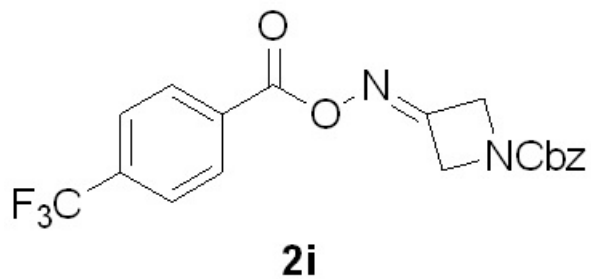

$^{13}\text{C}$  NMR (126 MHz,  $\text{CDCl}_3$ )

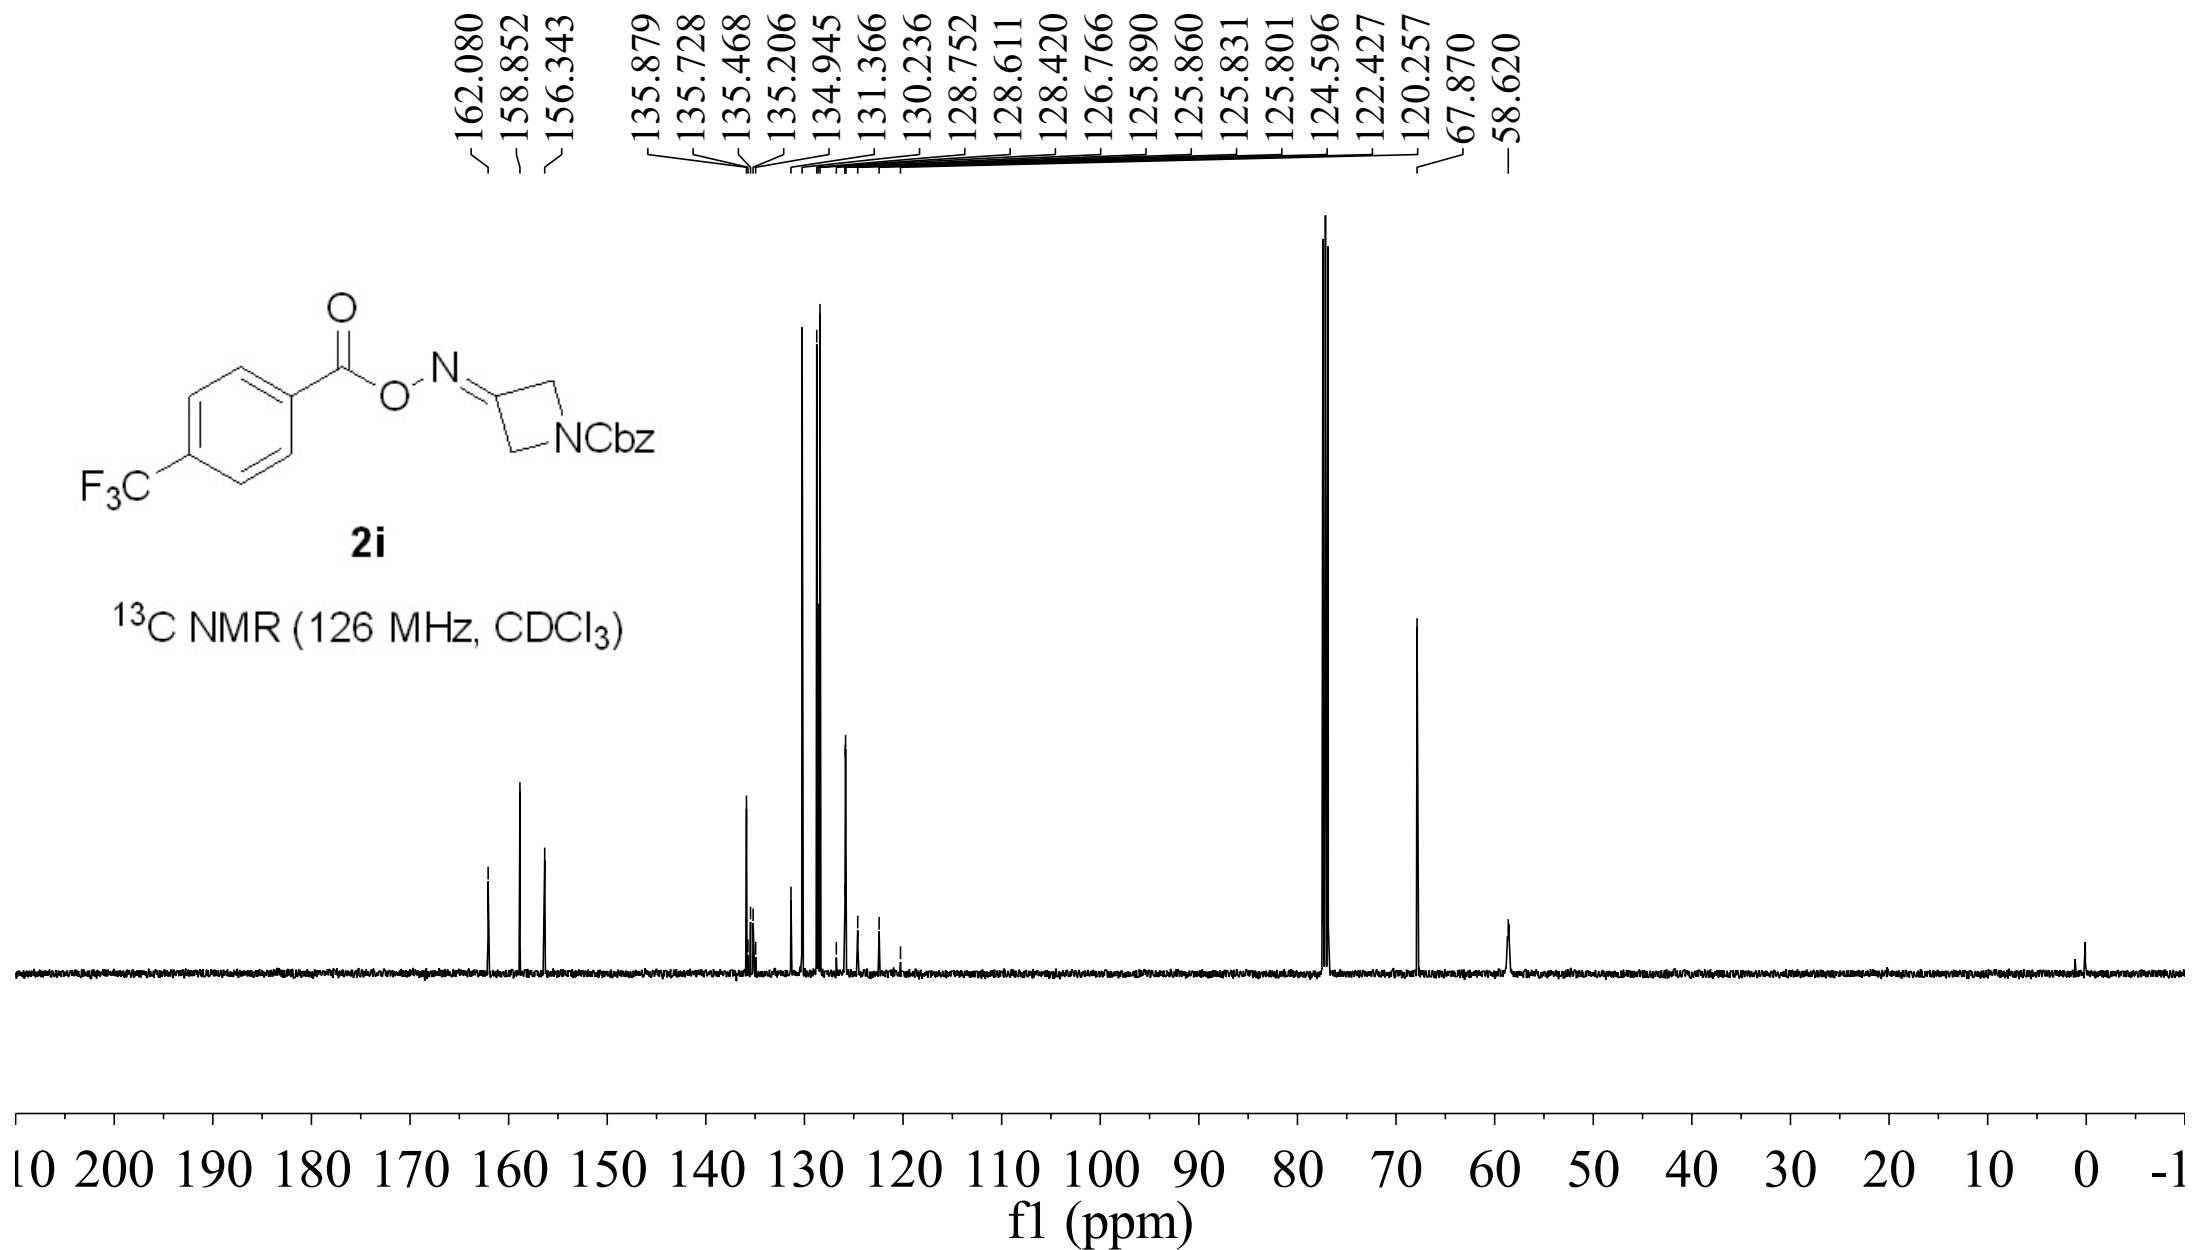

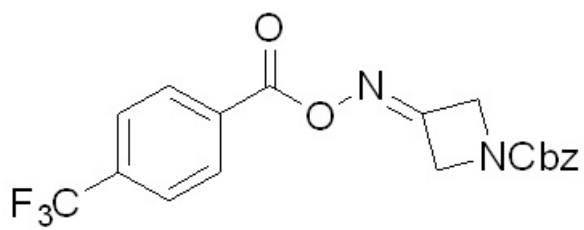

2i

<sup>19</sup>F NMR (471 MHz, CDCl<sub>3</sub>)

-63.252



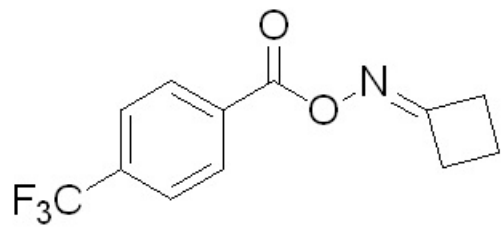

**2j**

<sup>1</sup>H NMR (500 MHz, CDCl<sub>3</sub>)

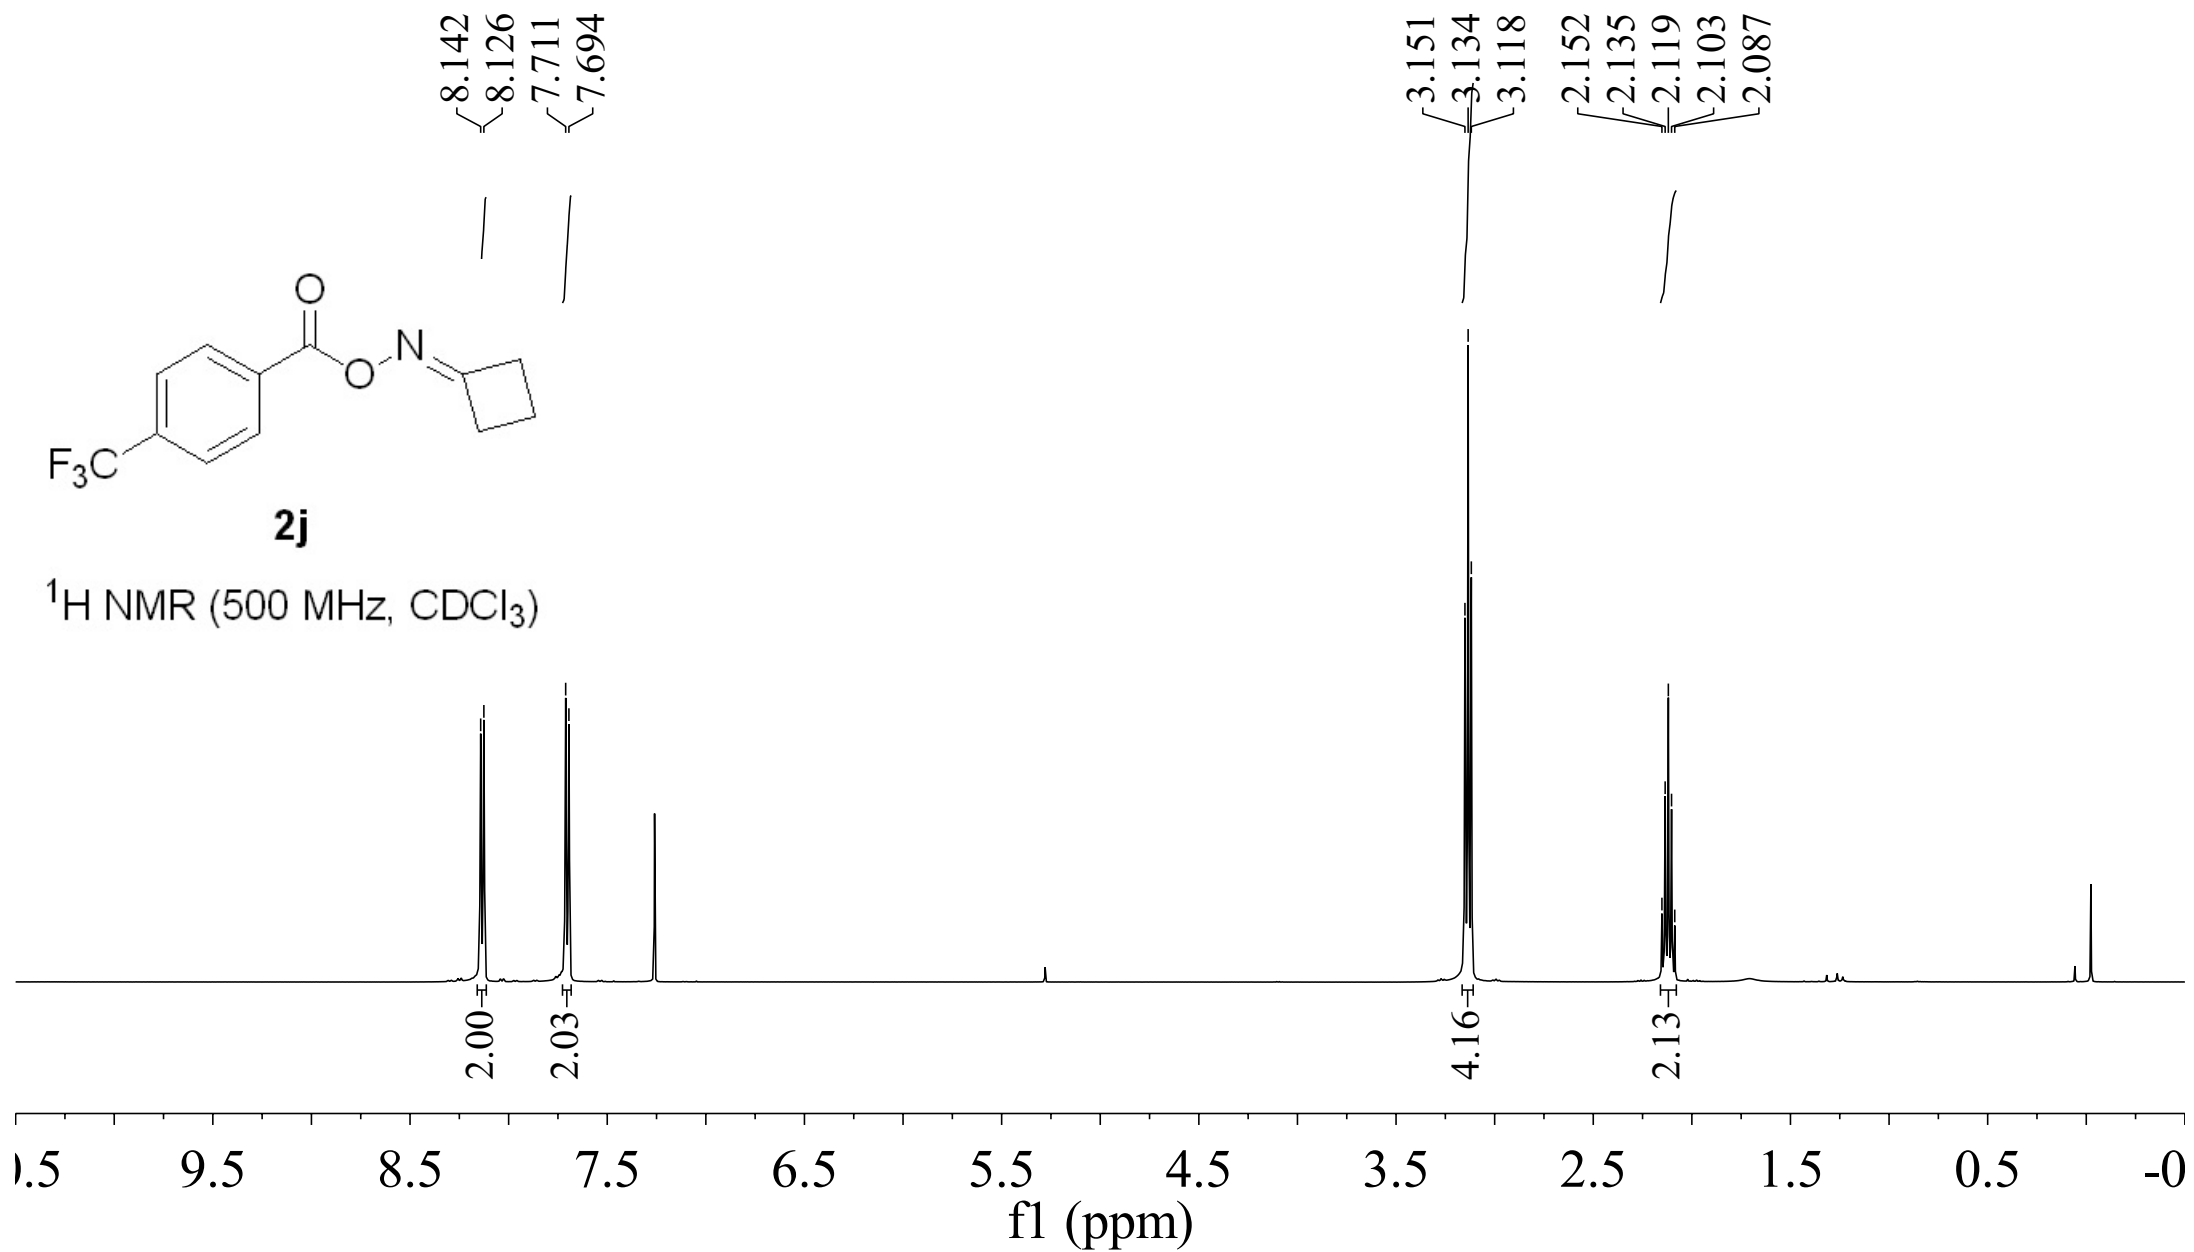

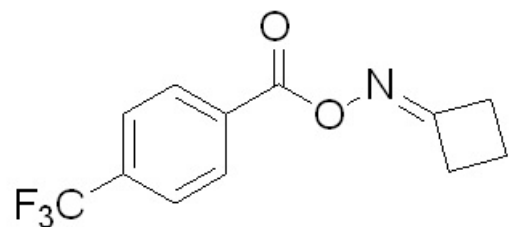

**2j**

$^{13}\text{C}$  NMR (126 MHz,  $\text{CDCl}_3$ )

170.122  
162.920  
135.144  
134.884  
134.624  
134.363  
132.477  
130.085  
126.891  
125.661  
125.631  
125.602  
125.572  
124.724  
122.554  
120.385

31.973  
31.956

14.368

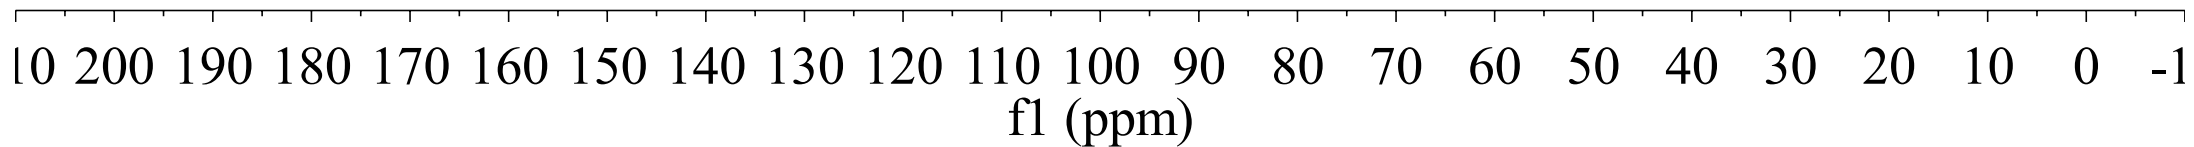



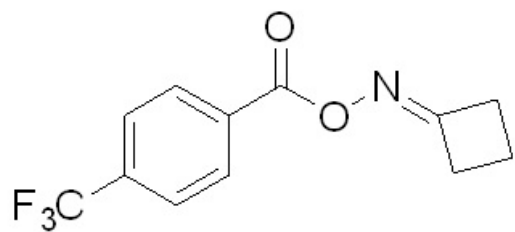

**2j**

$^{19}F$  NMR (471 MHz,  $CDCl_3$ )

-63.217



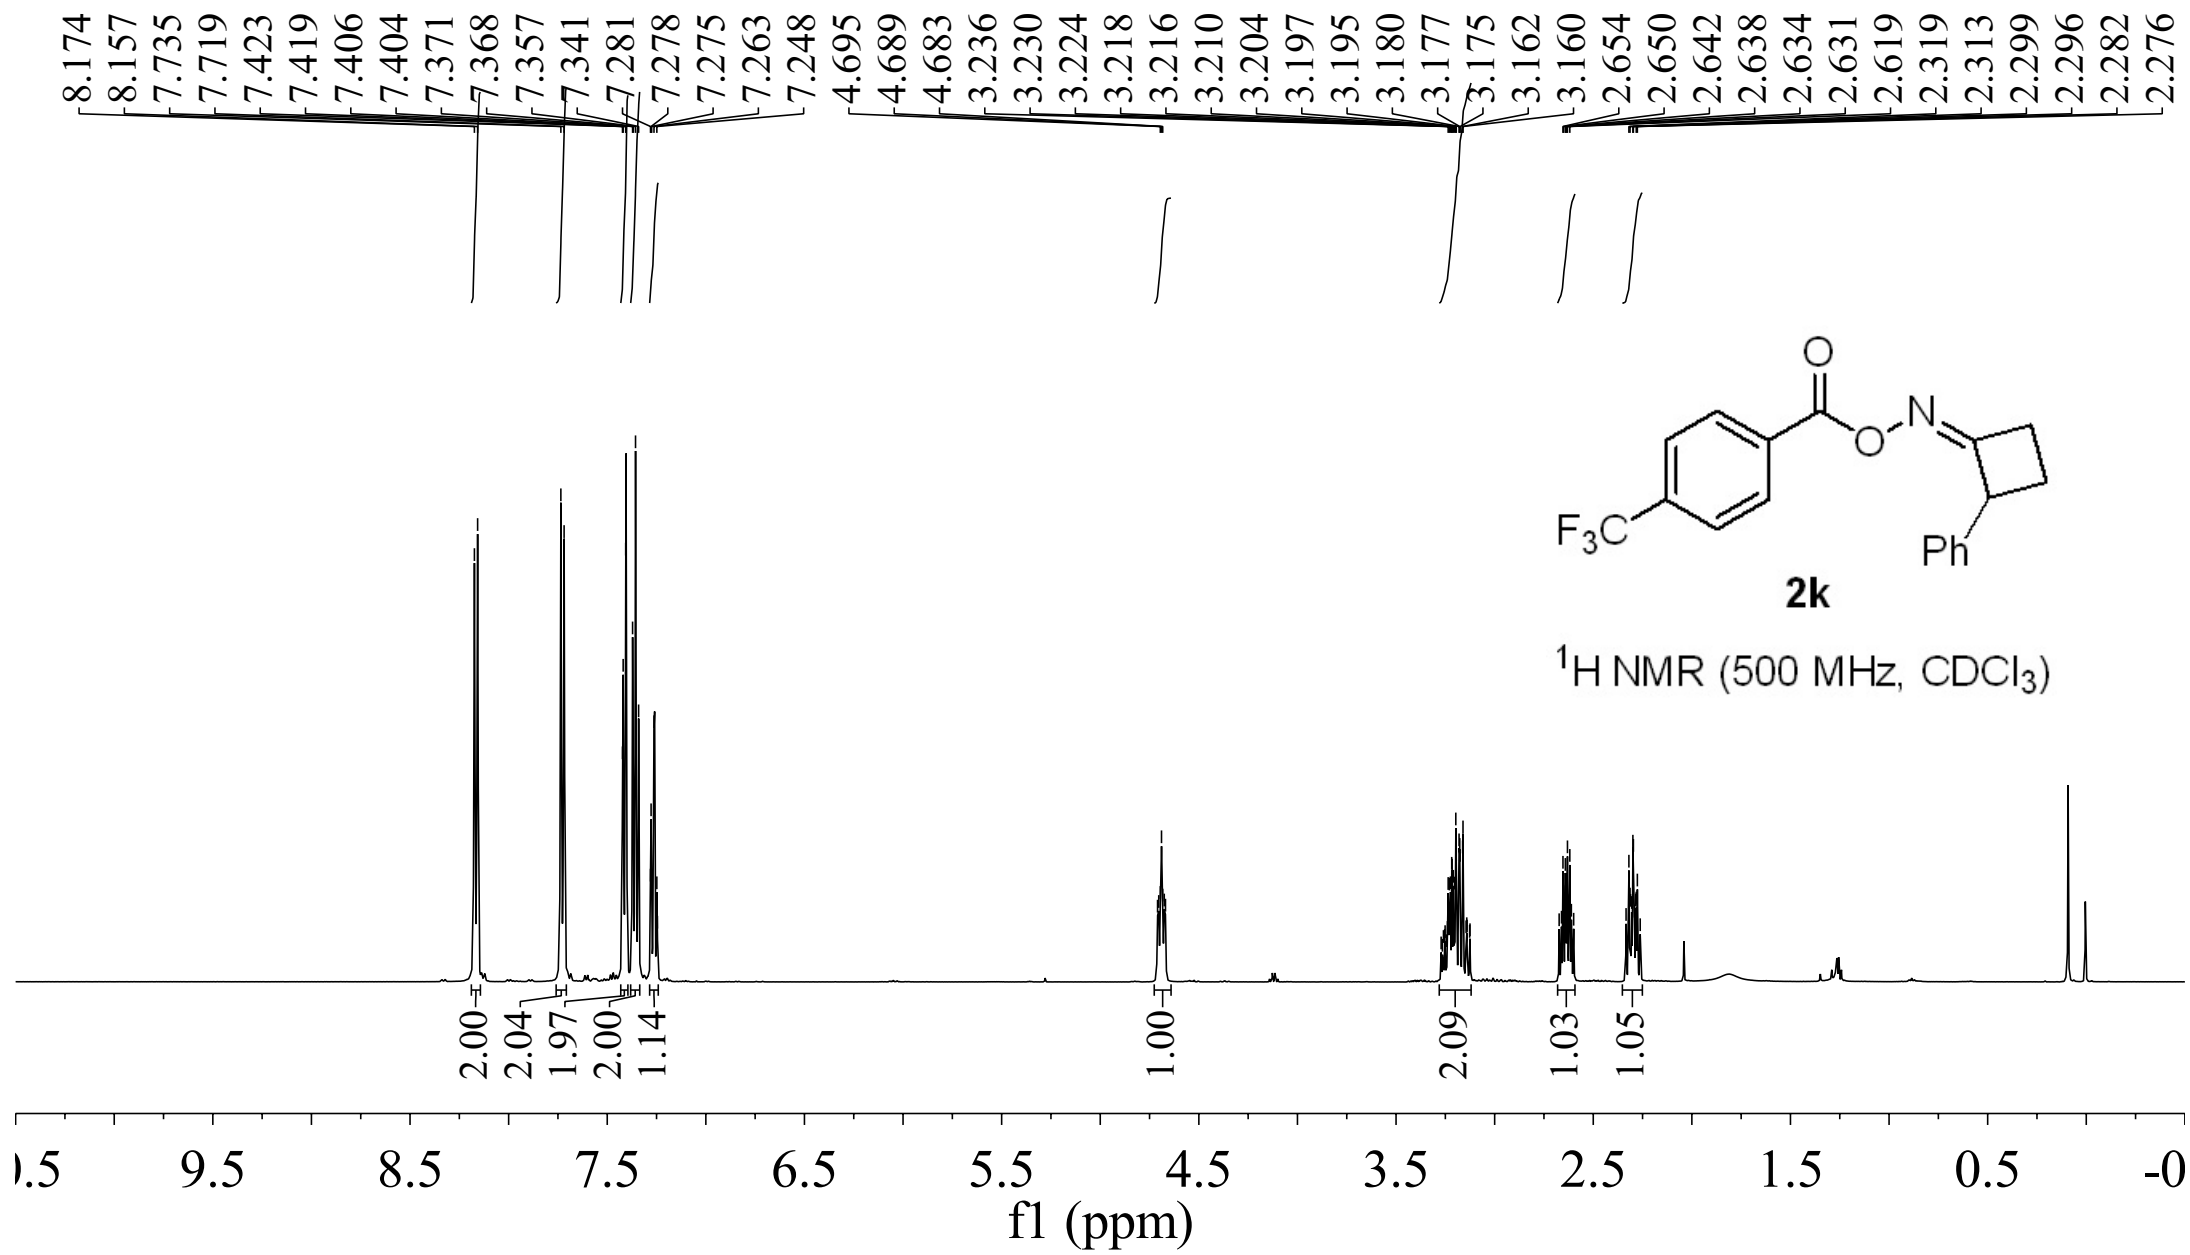

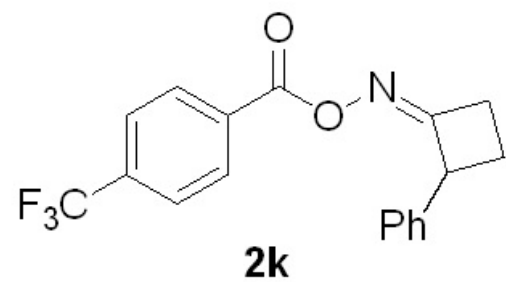

$^{13}\text{C}$  NMR (126 MHz,  $\text{CDCl}_3$ )

171.719  
162.822  
138.586  
135.149  
134.887  
134.627  
134.366  
132.481  
130.094  
128.780  
127.263  
127.202  
126.898  
125.680  
125.651  
125.621  
125.591  
124.728  
122.559  
120.391

49.722

29.647

23.303

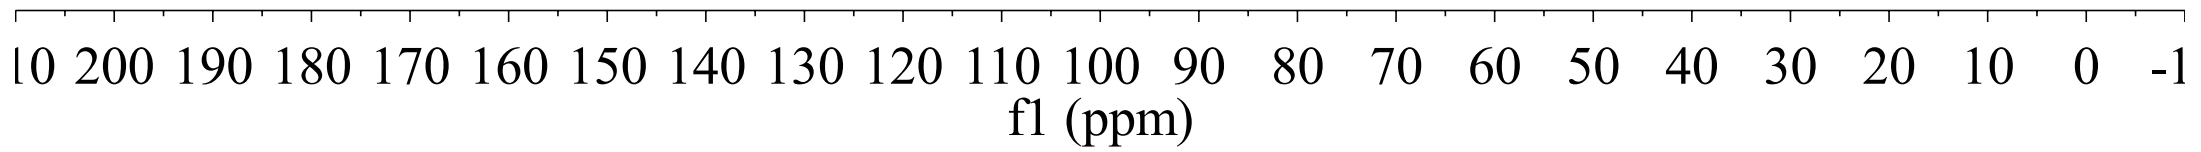

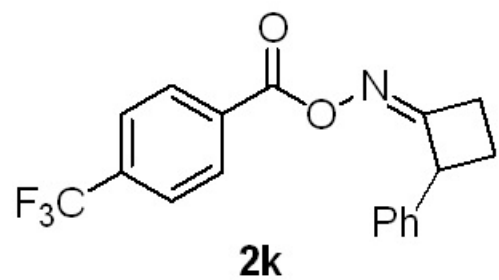

$^{19}\text{F}$  NMR (471 MHz,  $\text{CDCl}_3$ )

--63.157



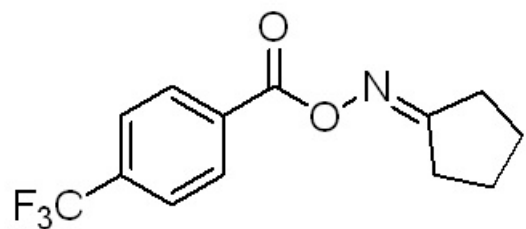

**2I**

<sup>1</sup>H NMR (500 MHz, CDCl<sub>3</sub>)

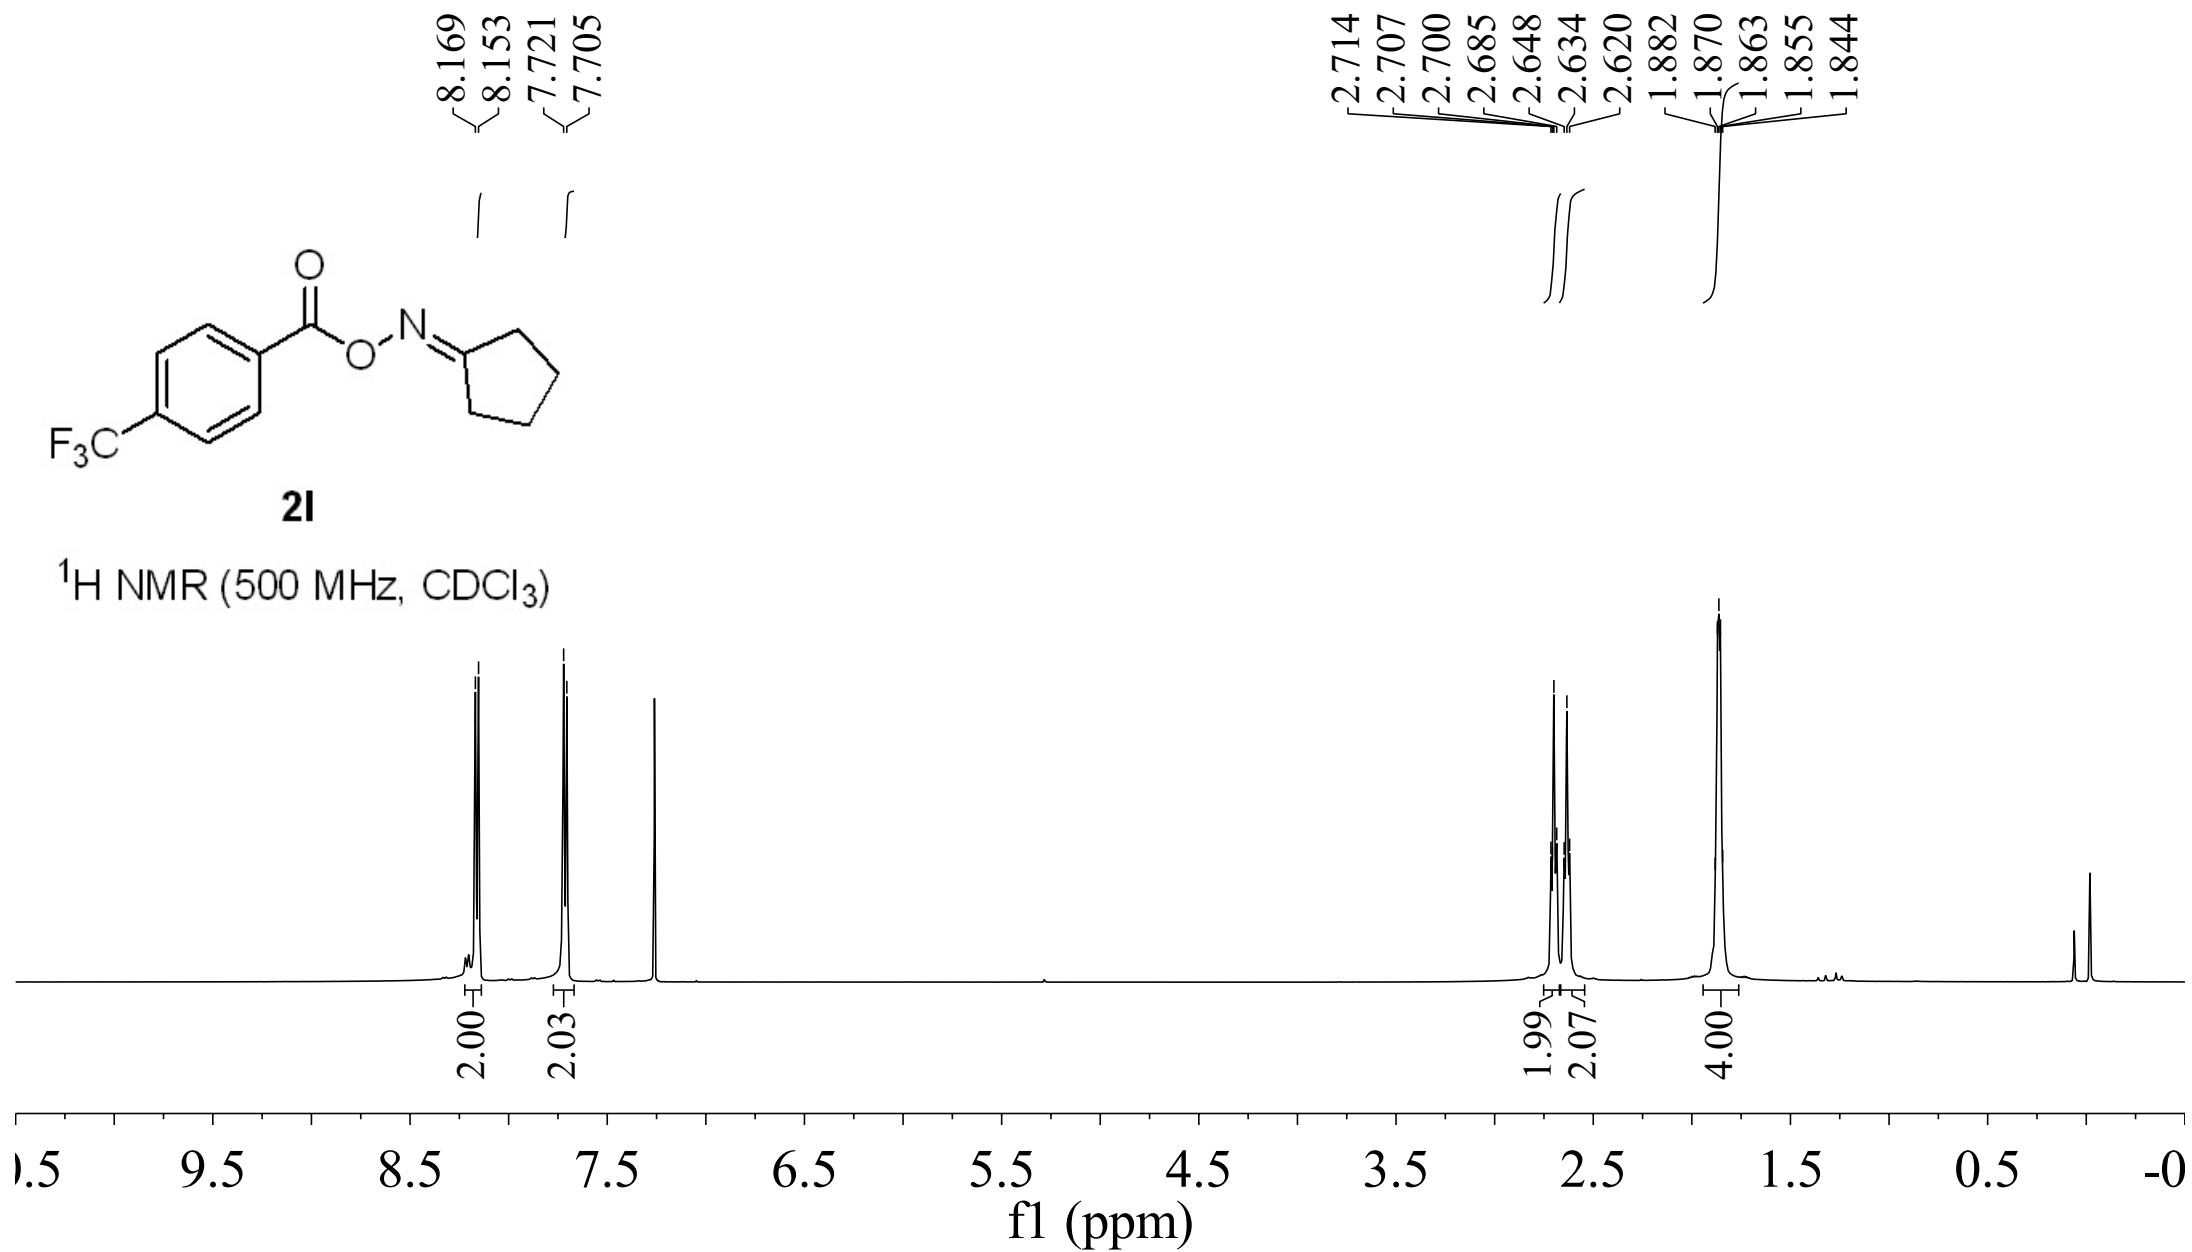

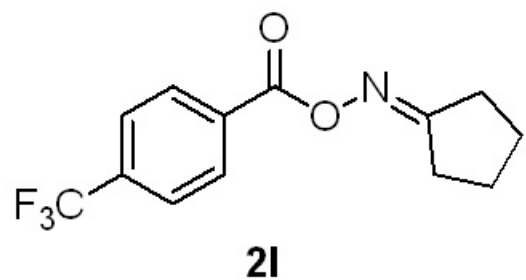

$^{13}\text{C}$  NMR (126 MHz,  $\text{CDCl}_3$ )

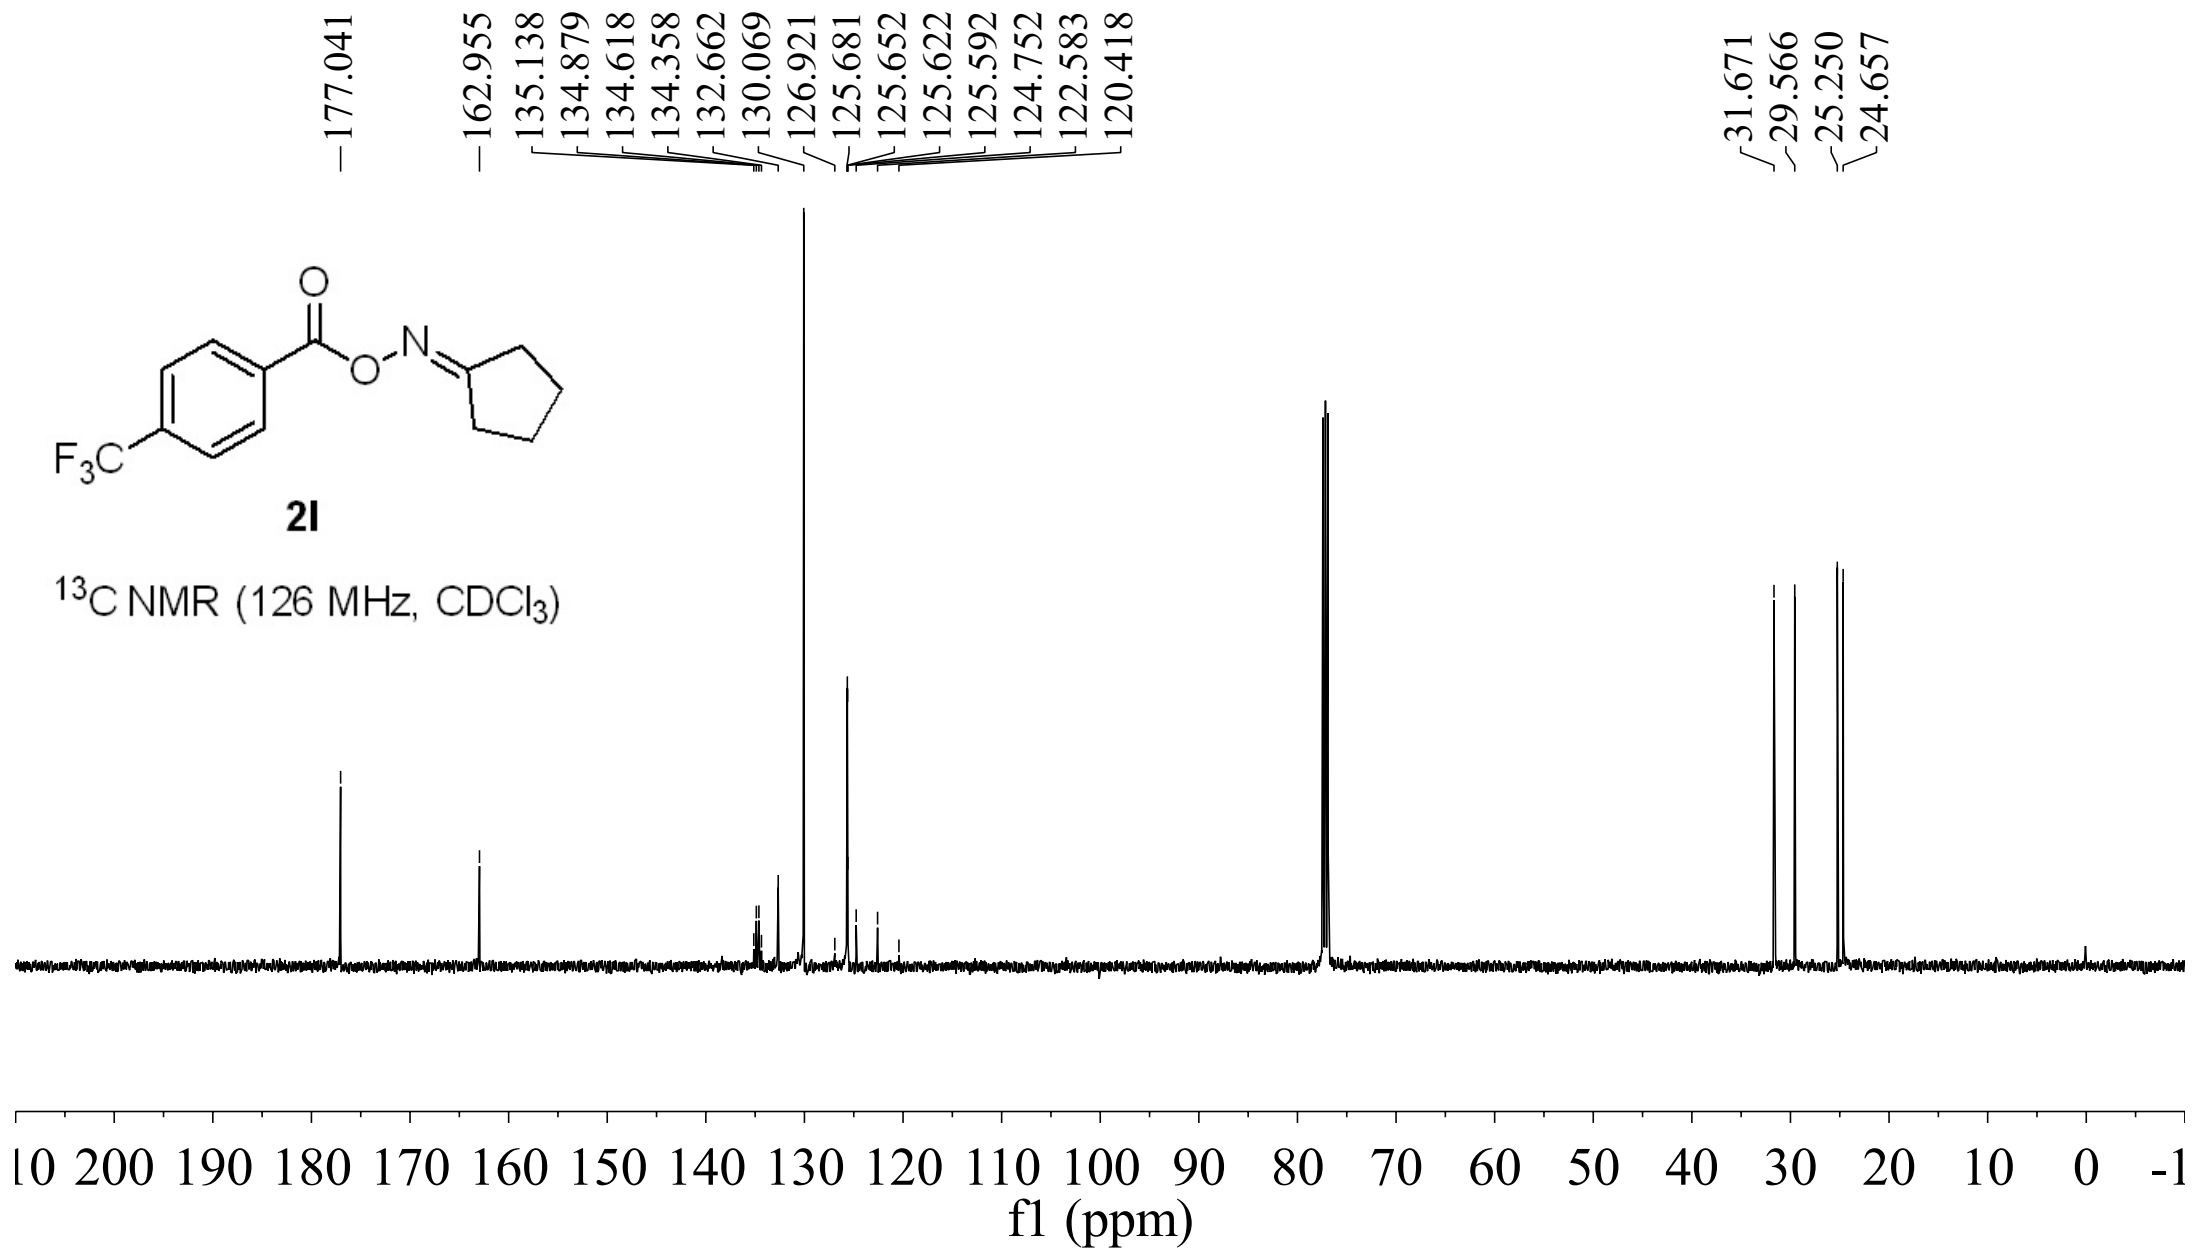

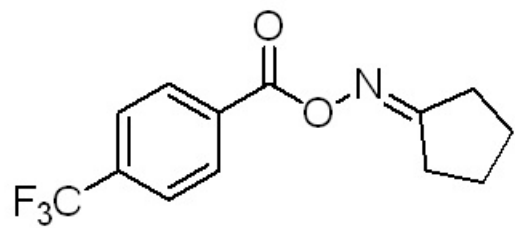

**21**

$^{19}\text{F}$  NMR (376 MHz,  $\text{CDCl}_3$ )

--63.199

10      -10      -30      -50      -70      -90      -110      -130      -150      -170      -190      -210  
f1 (ppm)

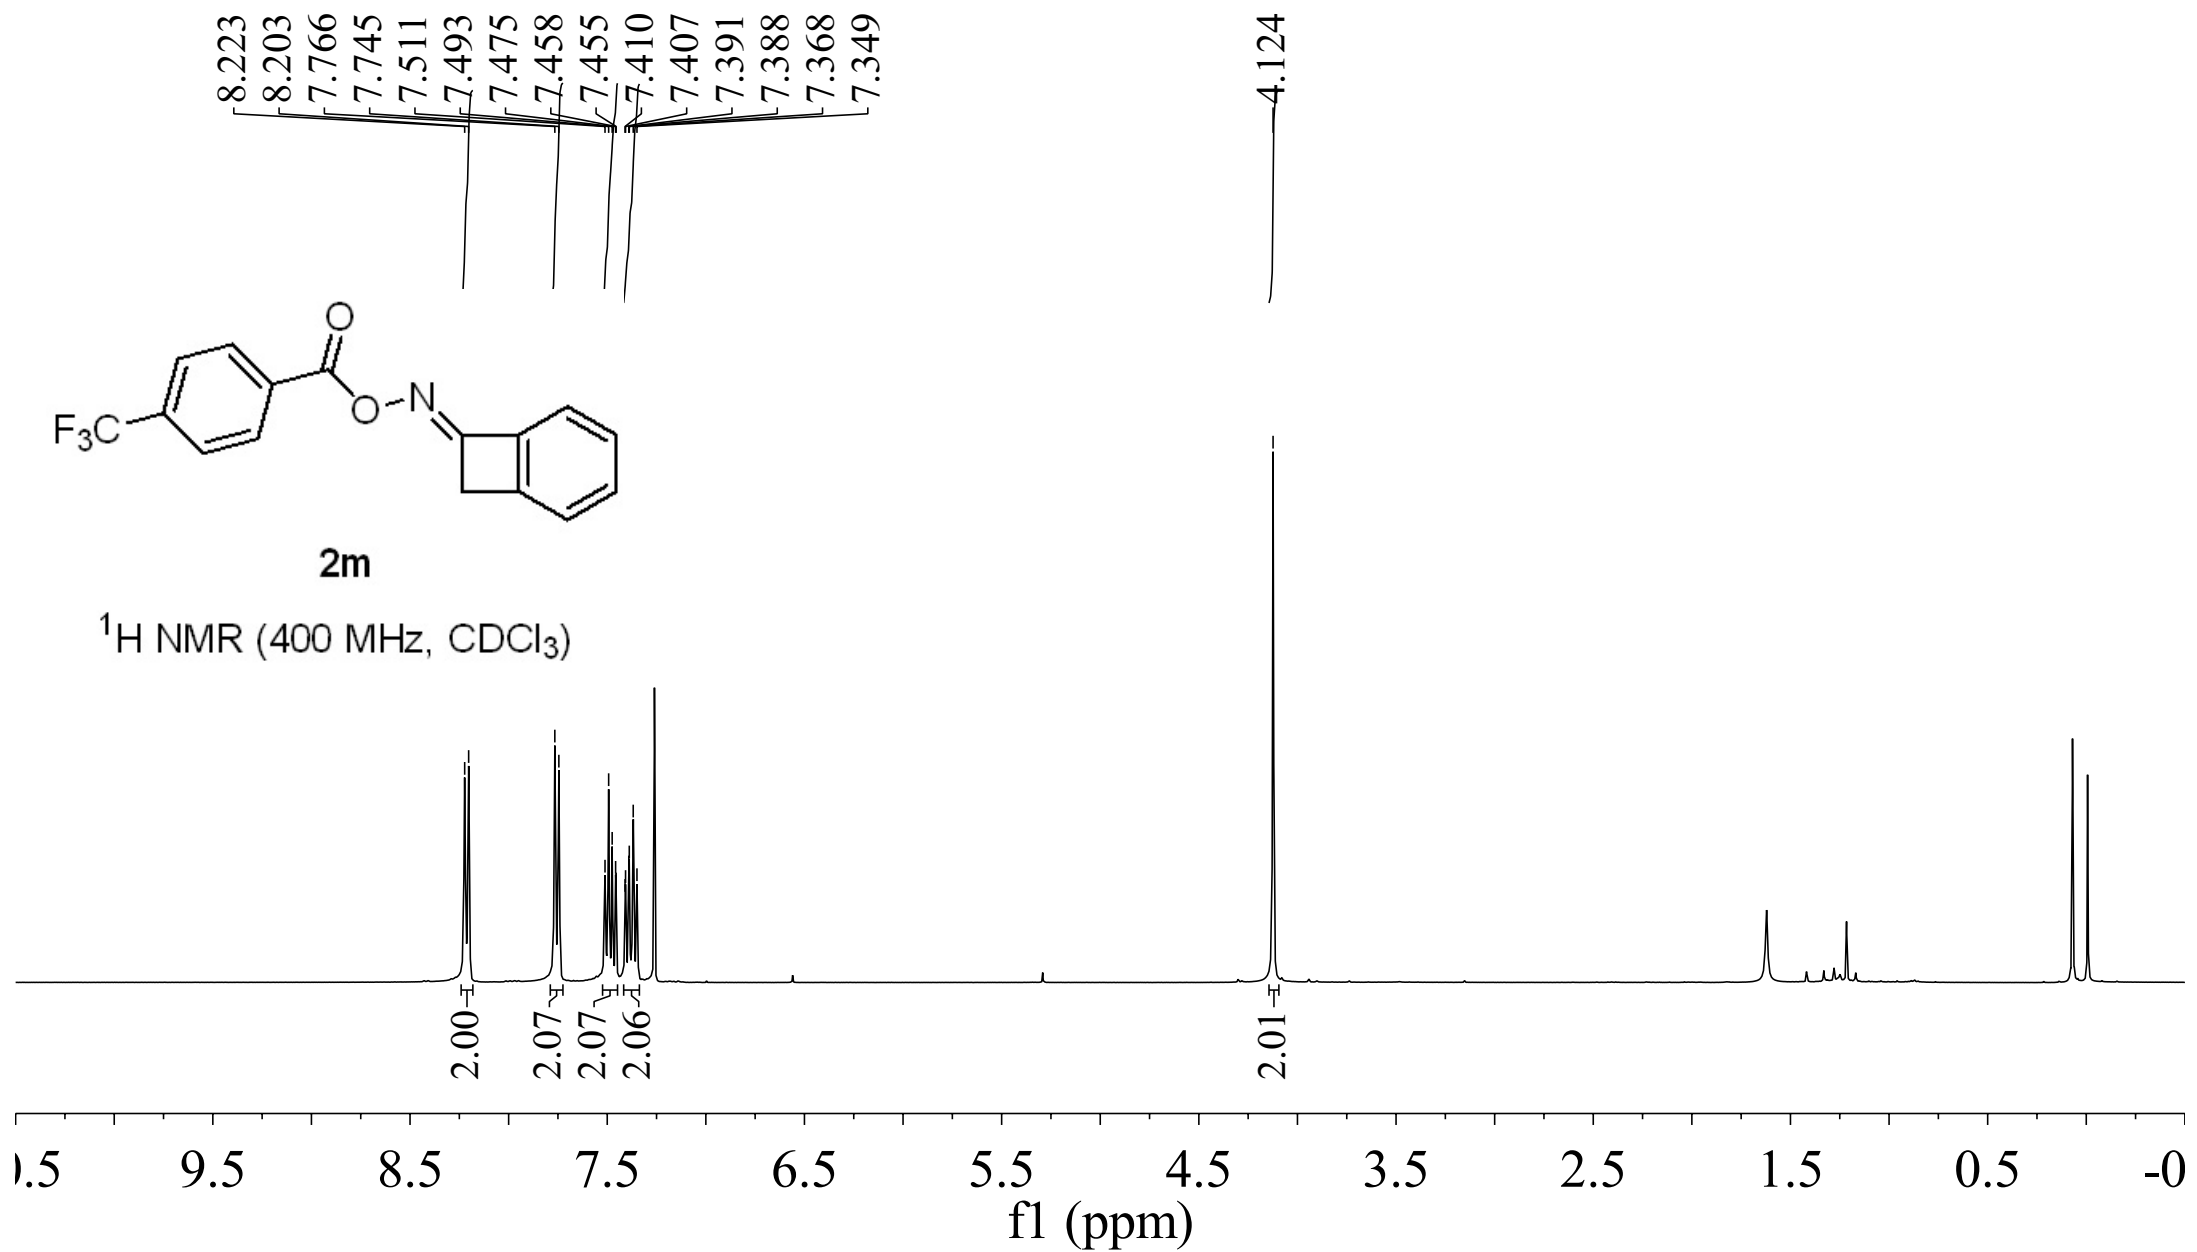



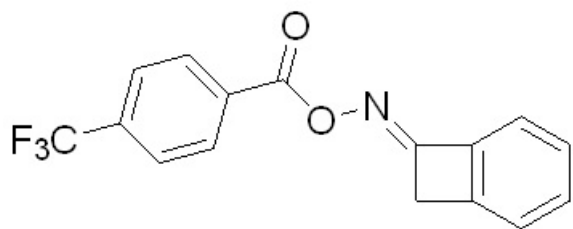

2m

$^{13}\text{C}$  NMR (101 MHz,  $\text{CDCl}_3$ )

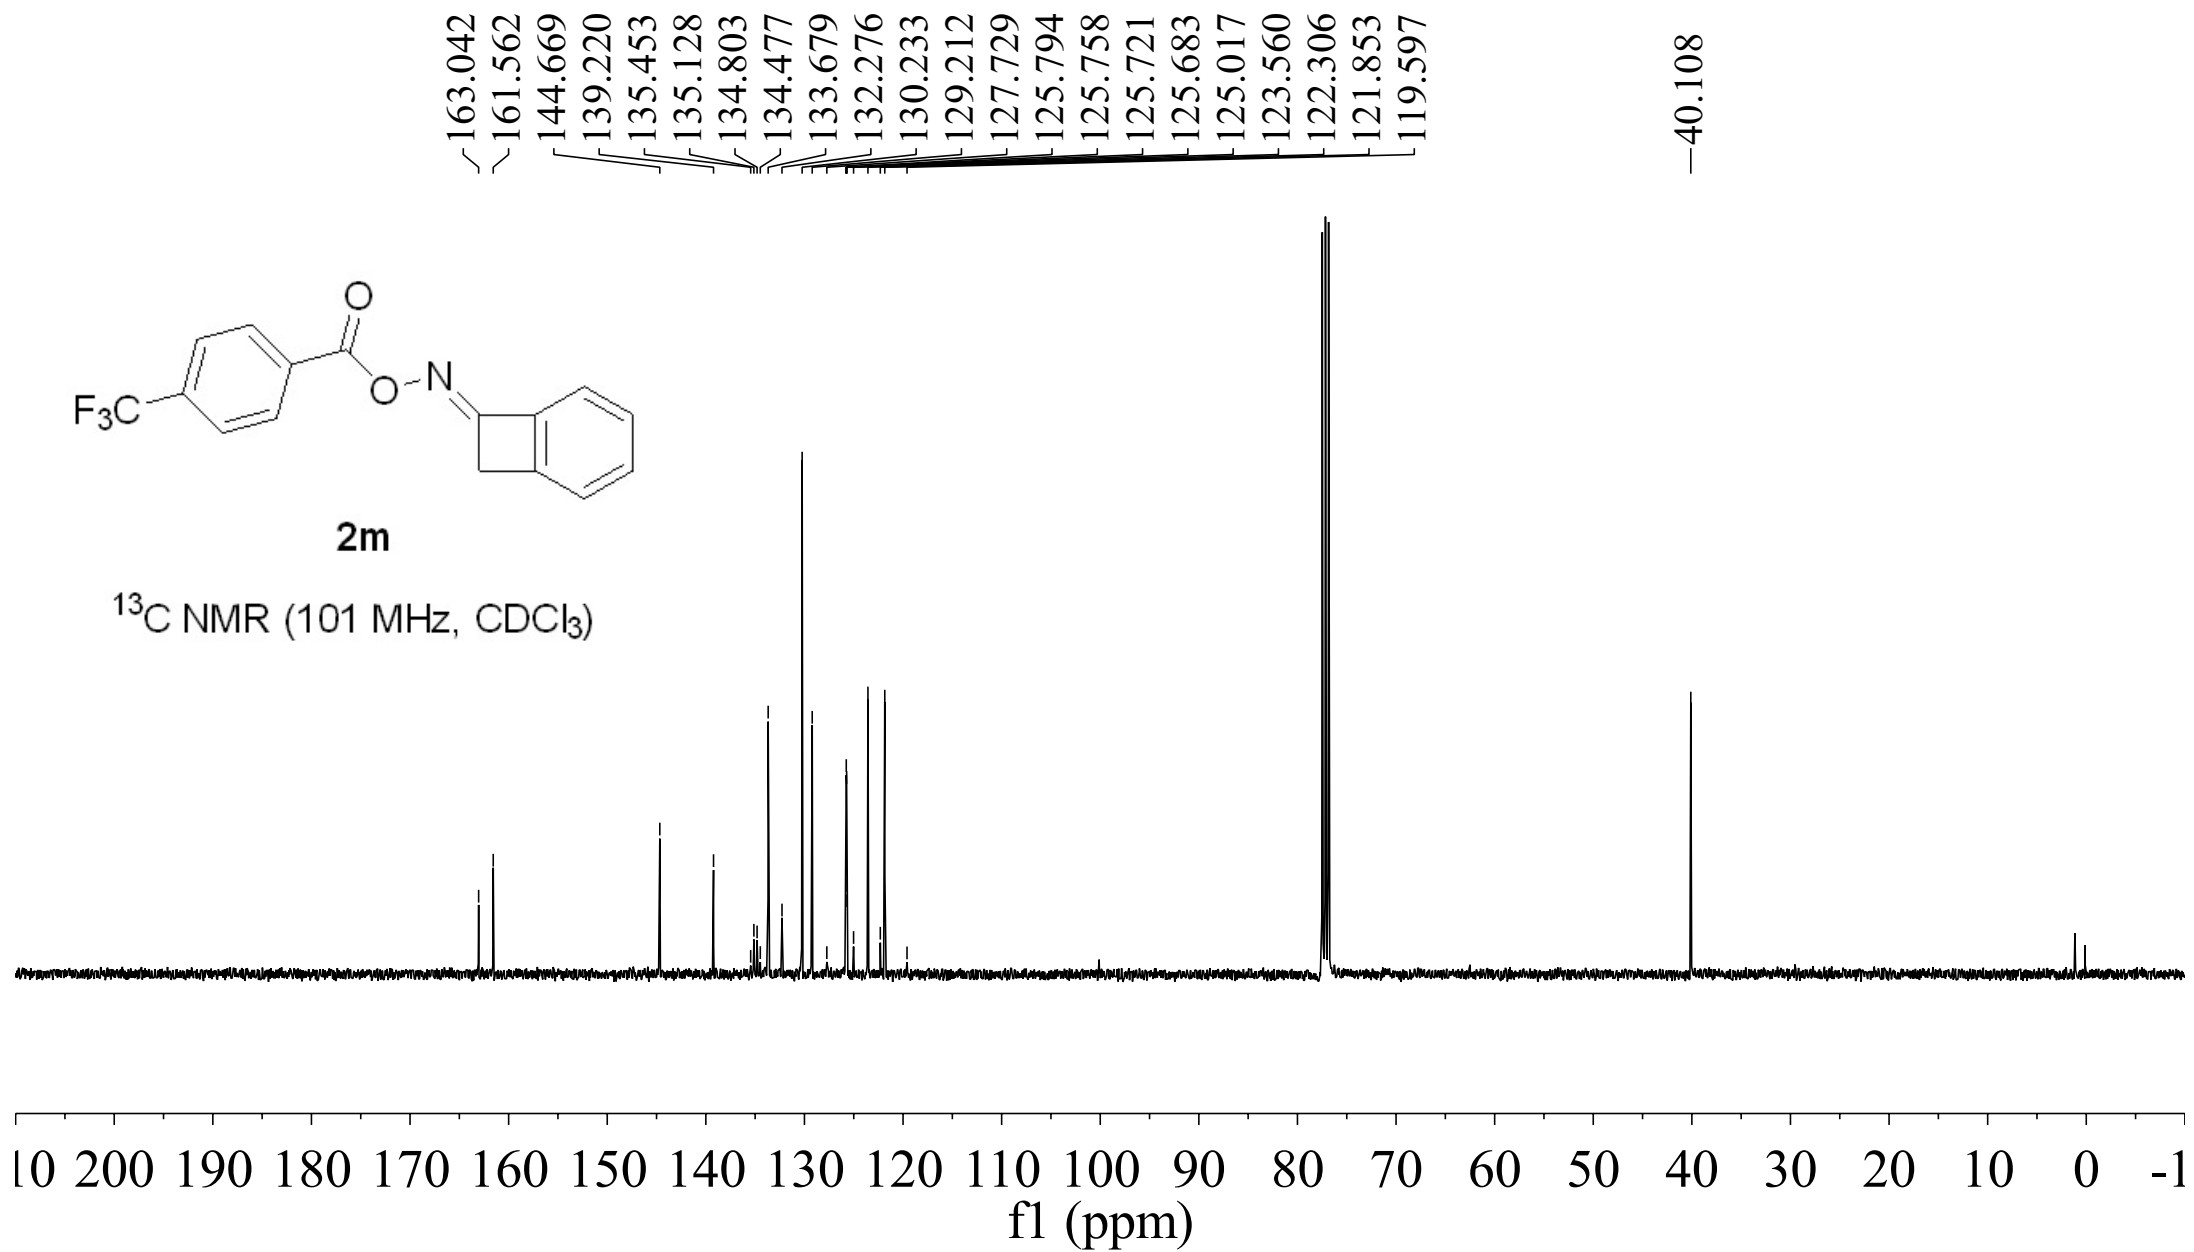

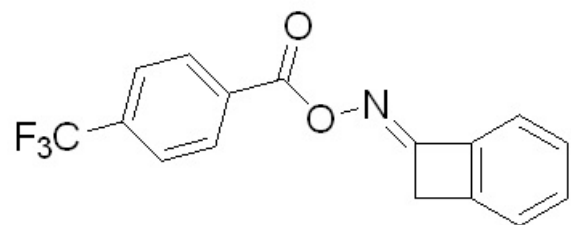

**2m**

$^{19}\text{F}$  NMR (376 MHz,  $\text{CDCl}_3$ )

--63.177

10      -10      -30      -50      -70      -90      -110      -130      -150      -170      -190      -210  
fl (ppm)

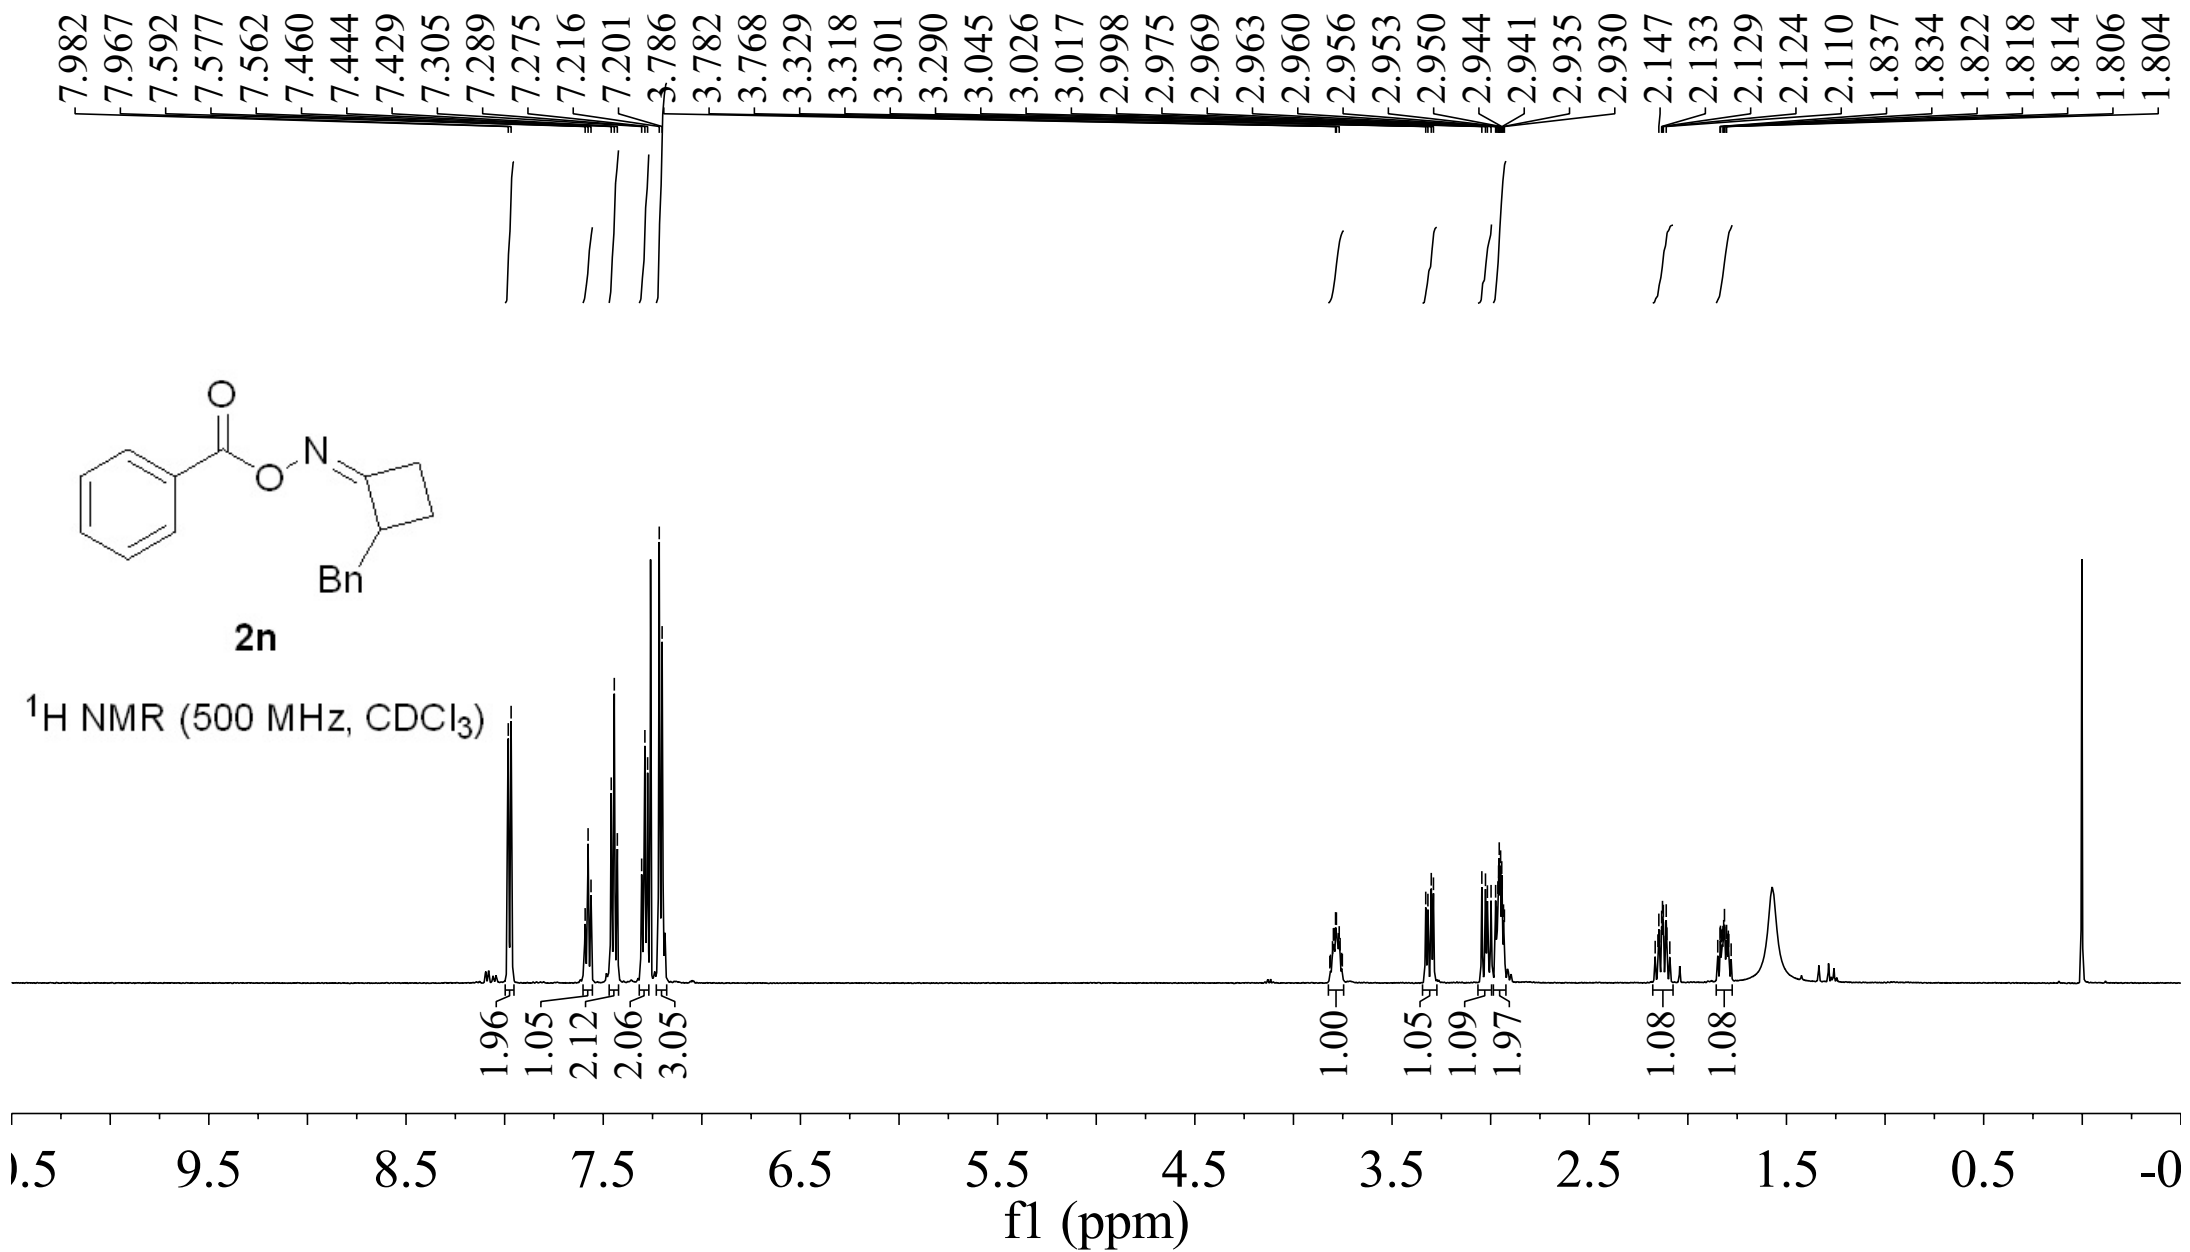

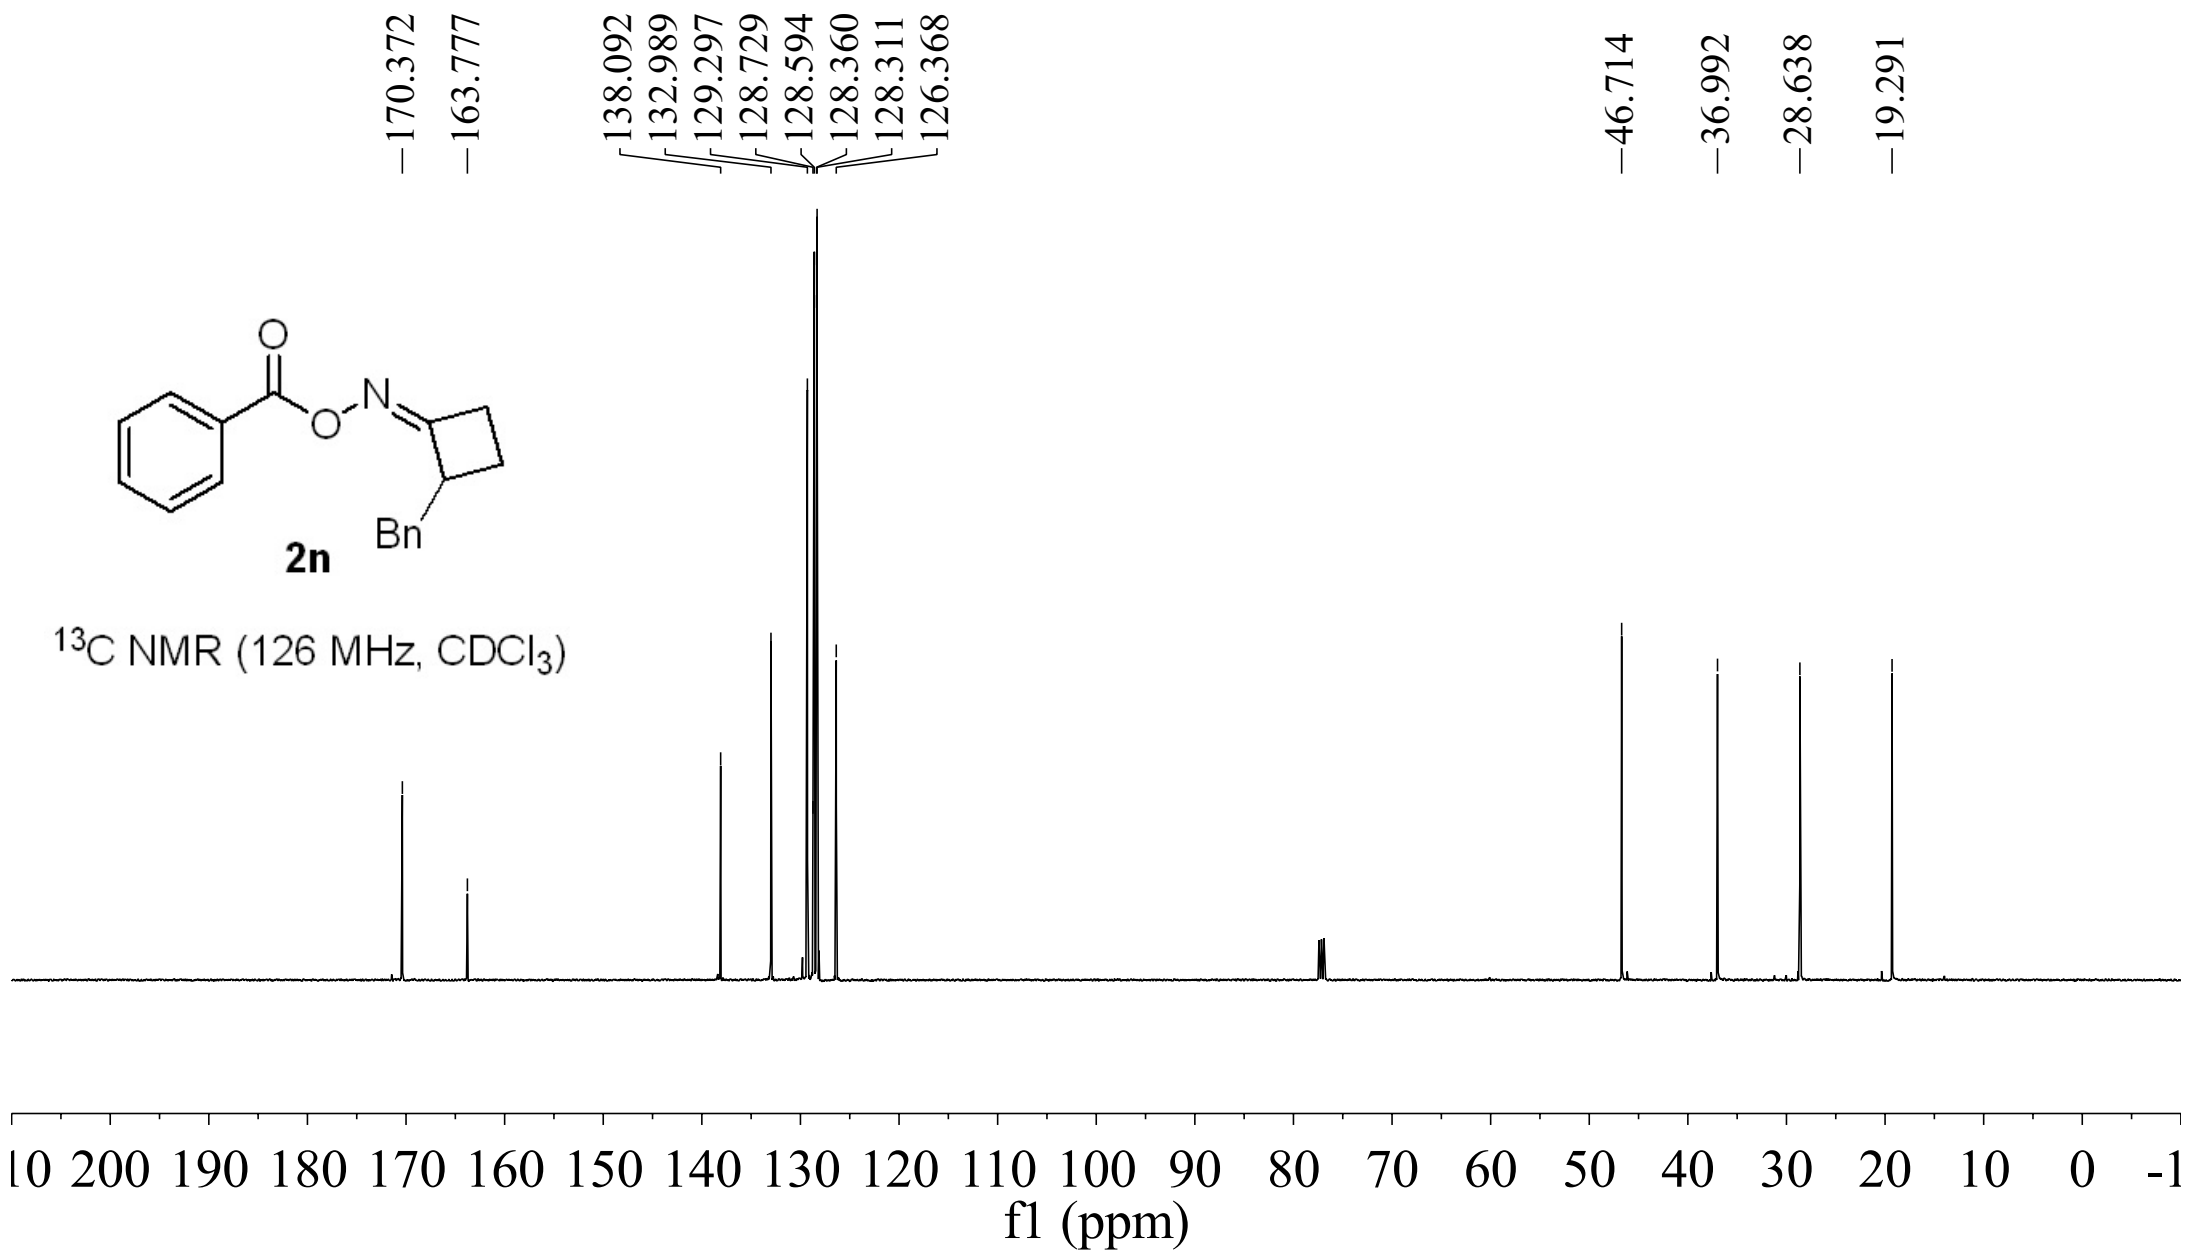

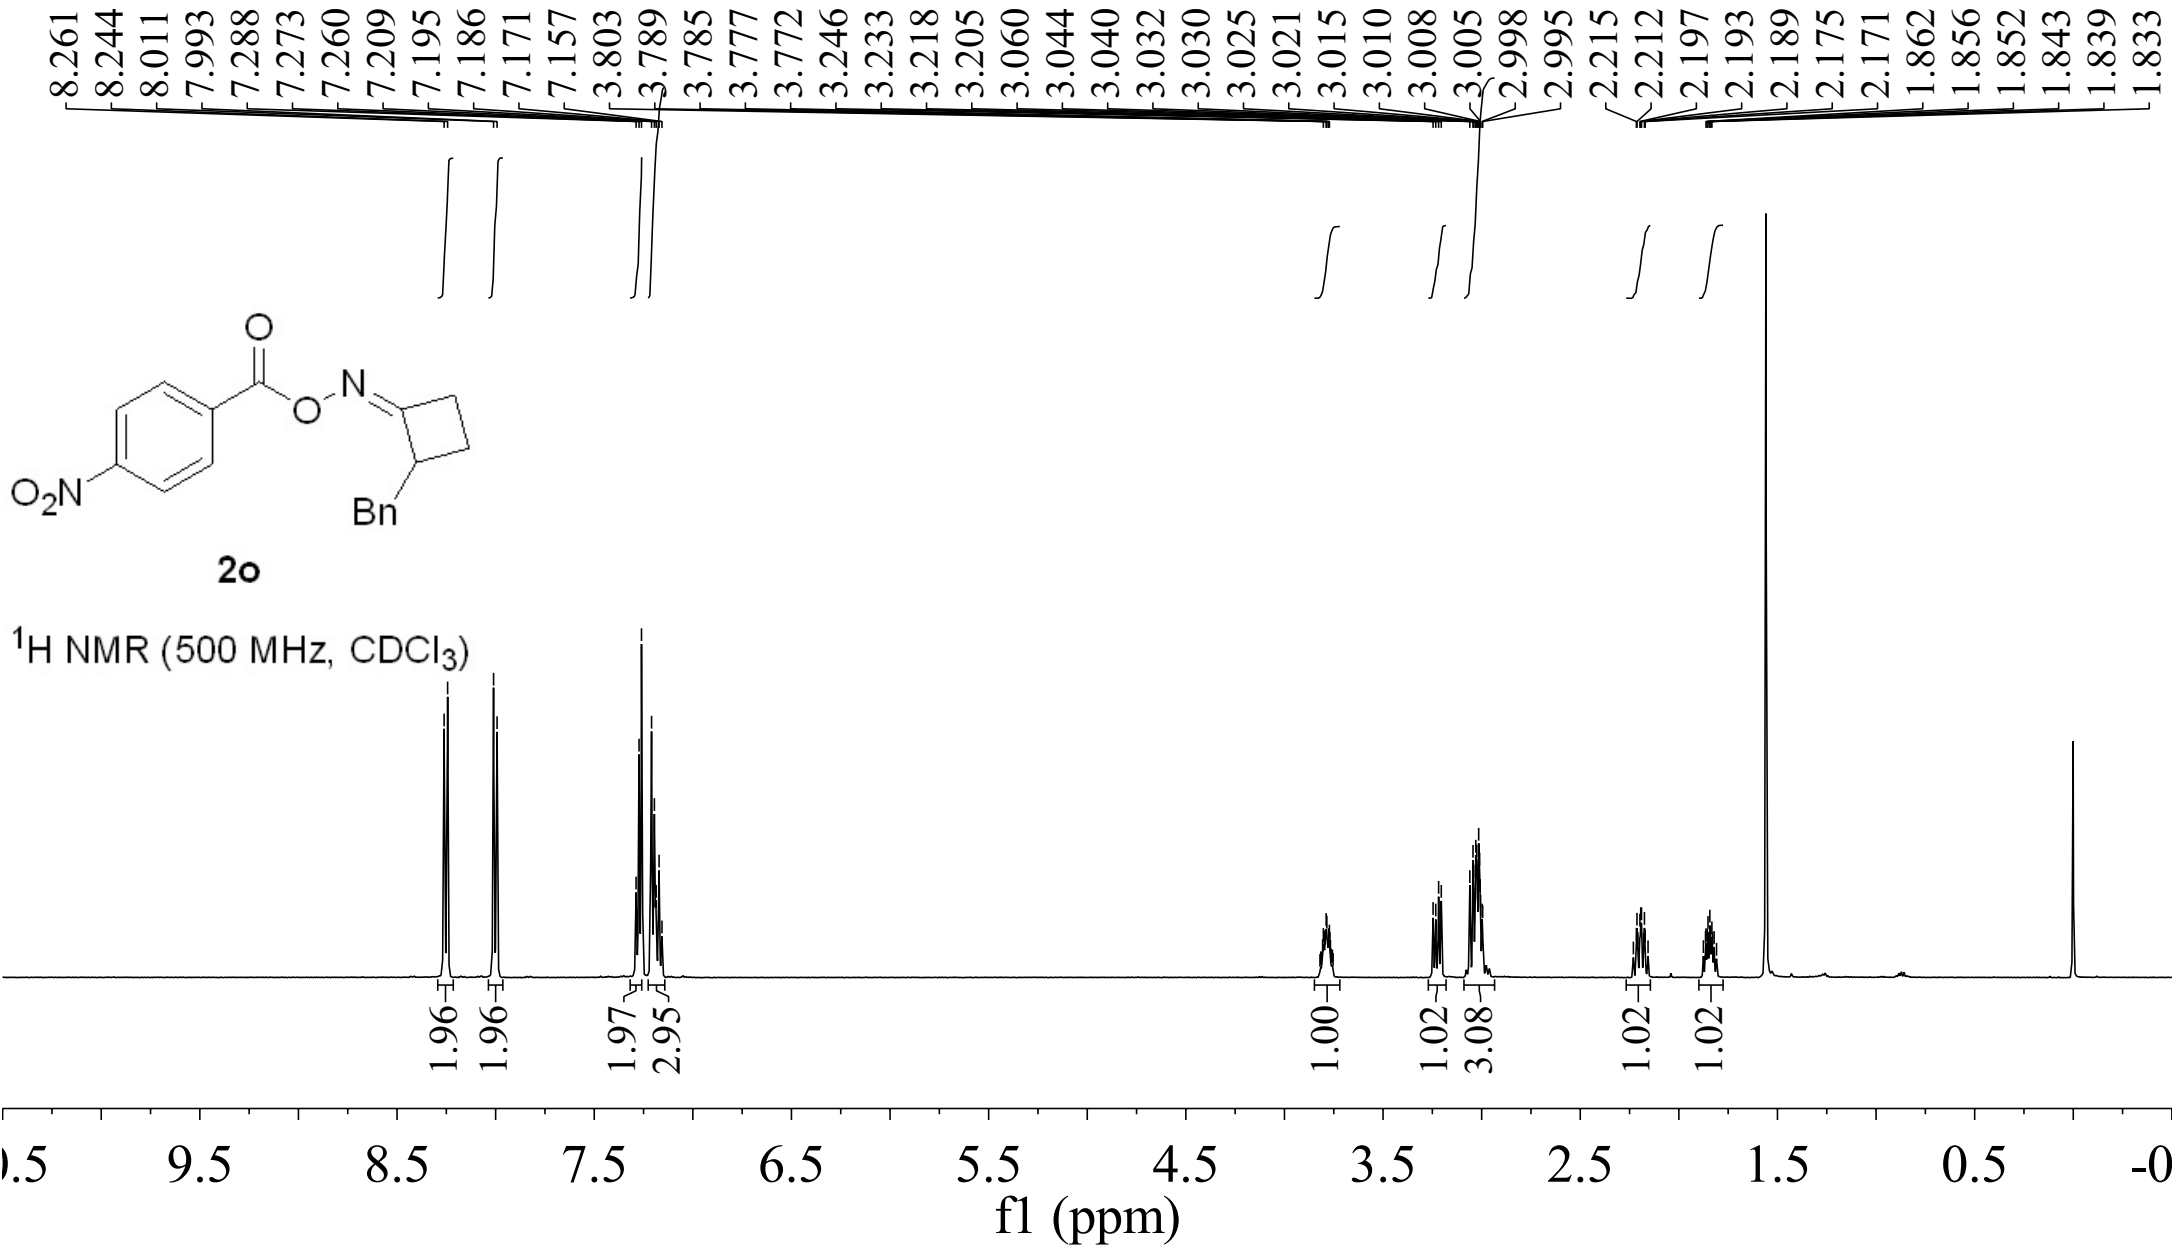

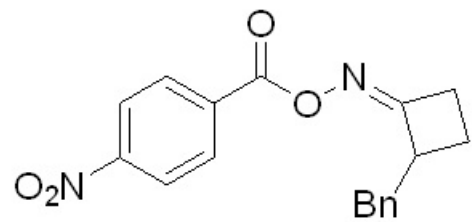

**2o**

$^{13}\text{C}$  NMR (126 MHz,  $\text{CDCl}_3$ )

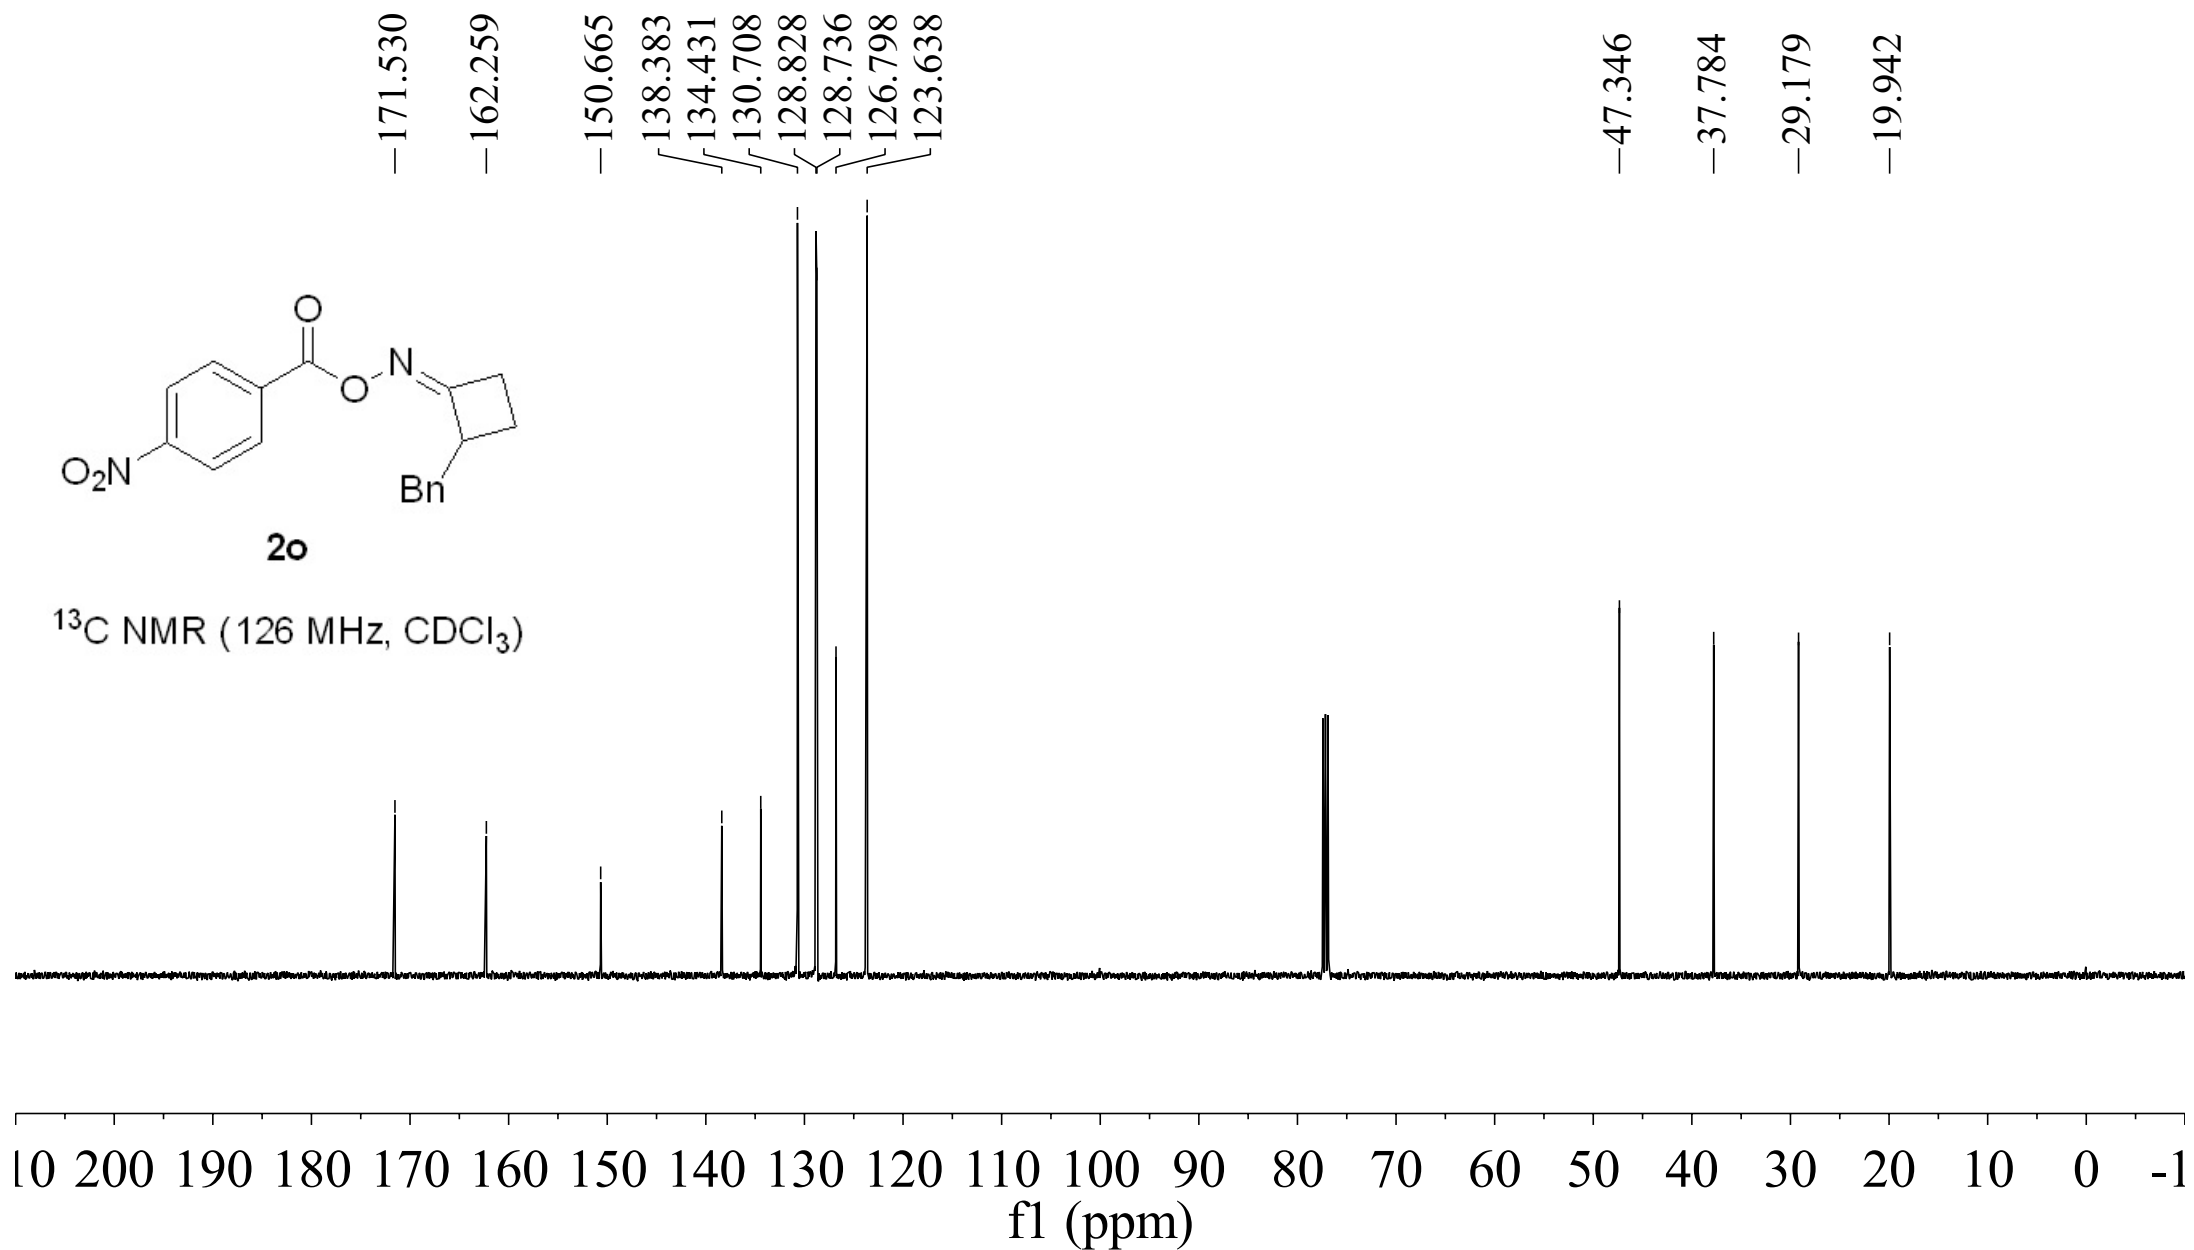

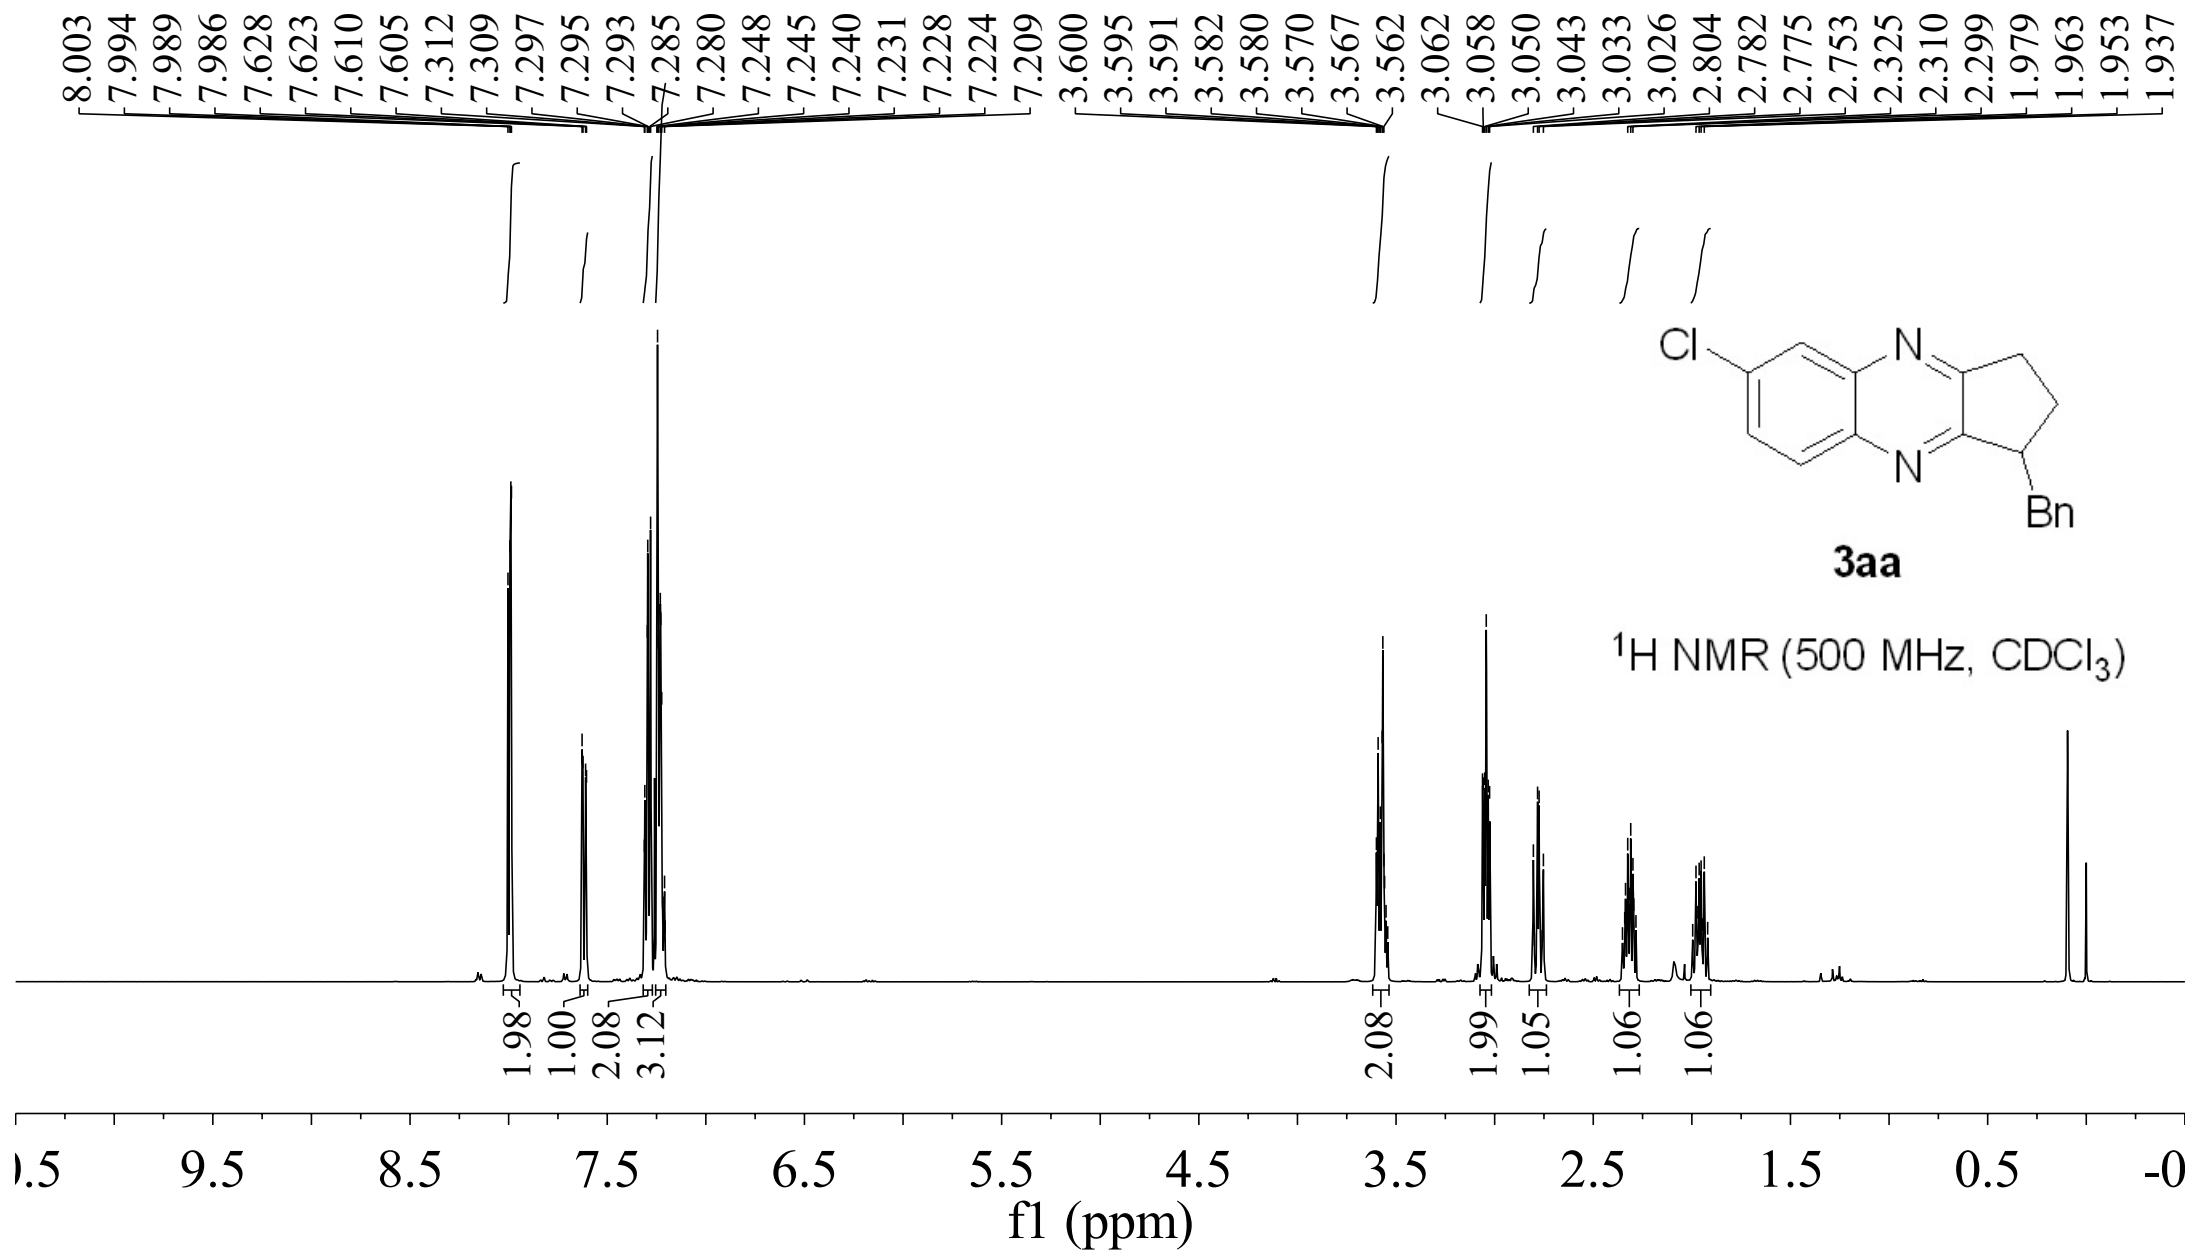

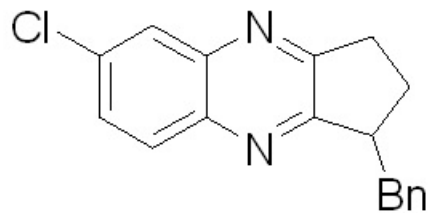

**3aa**

$^{13}\text{C}$  NMR (126 MHz,  $\text{CDCl}_3$ )

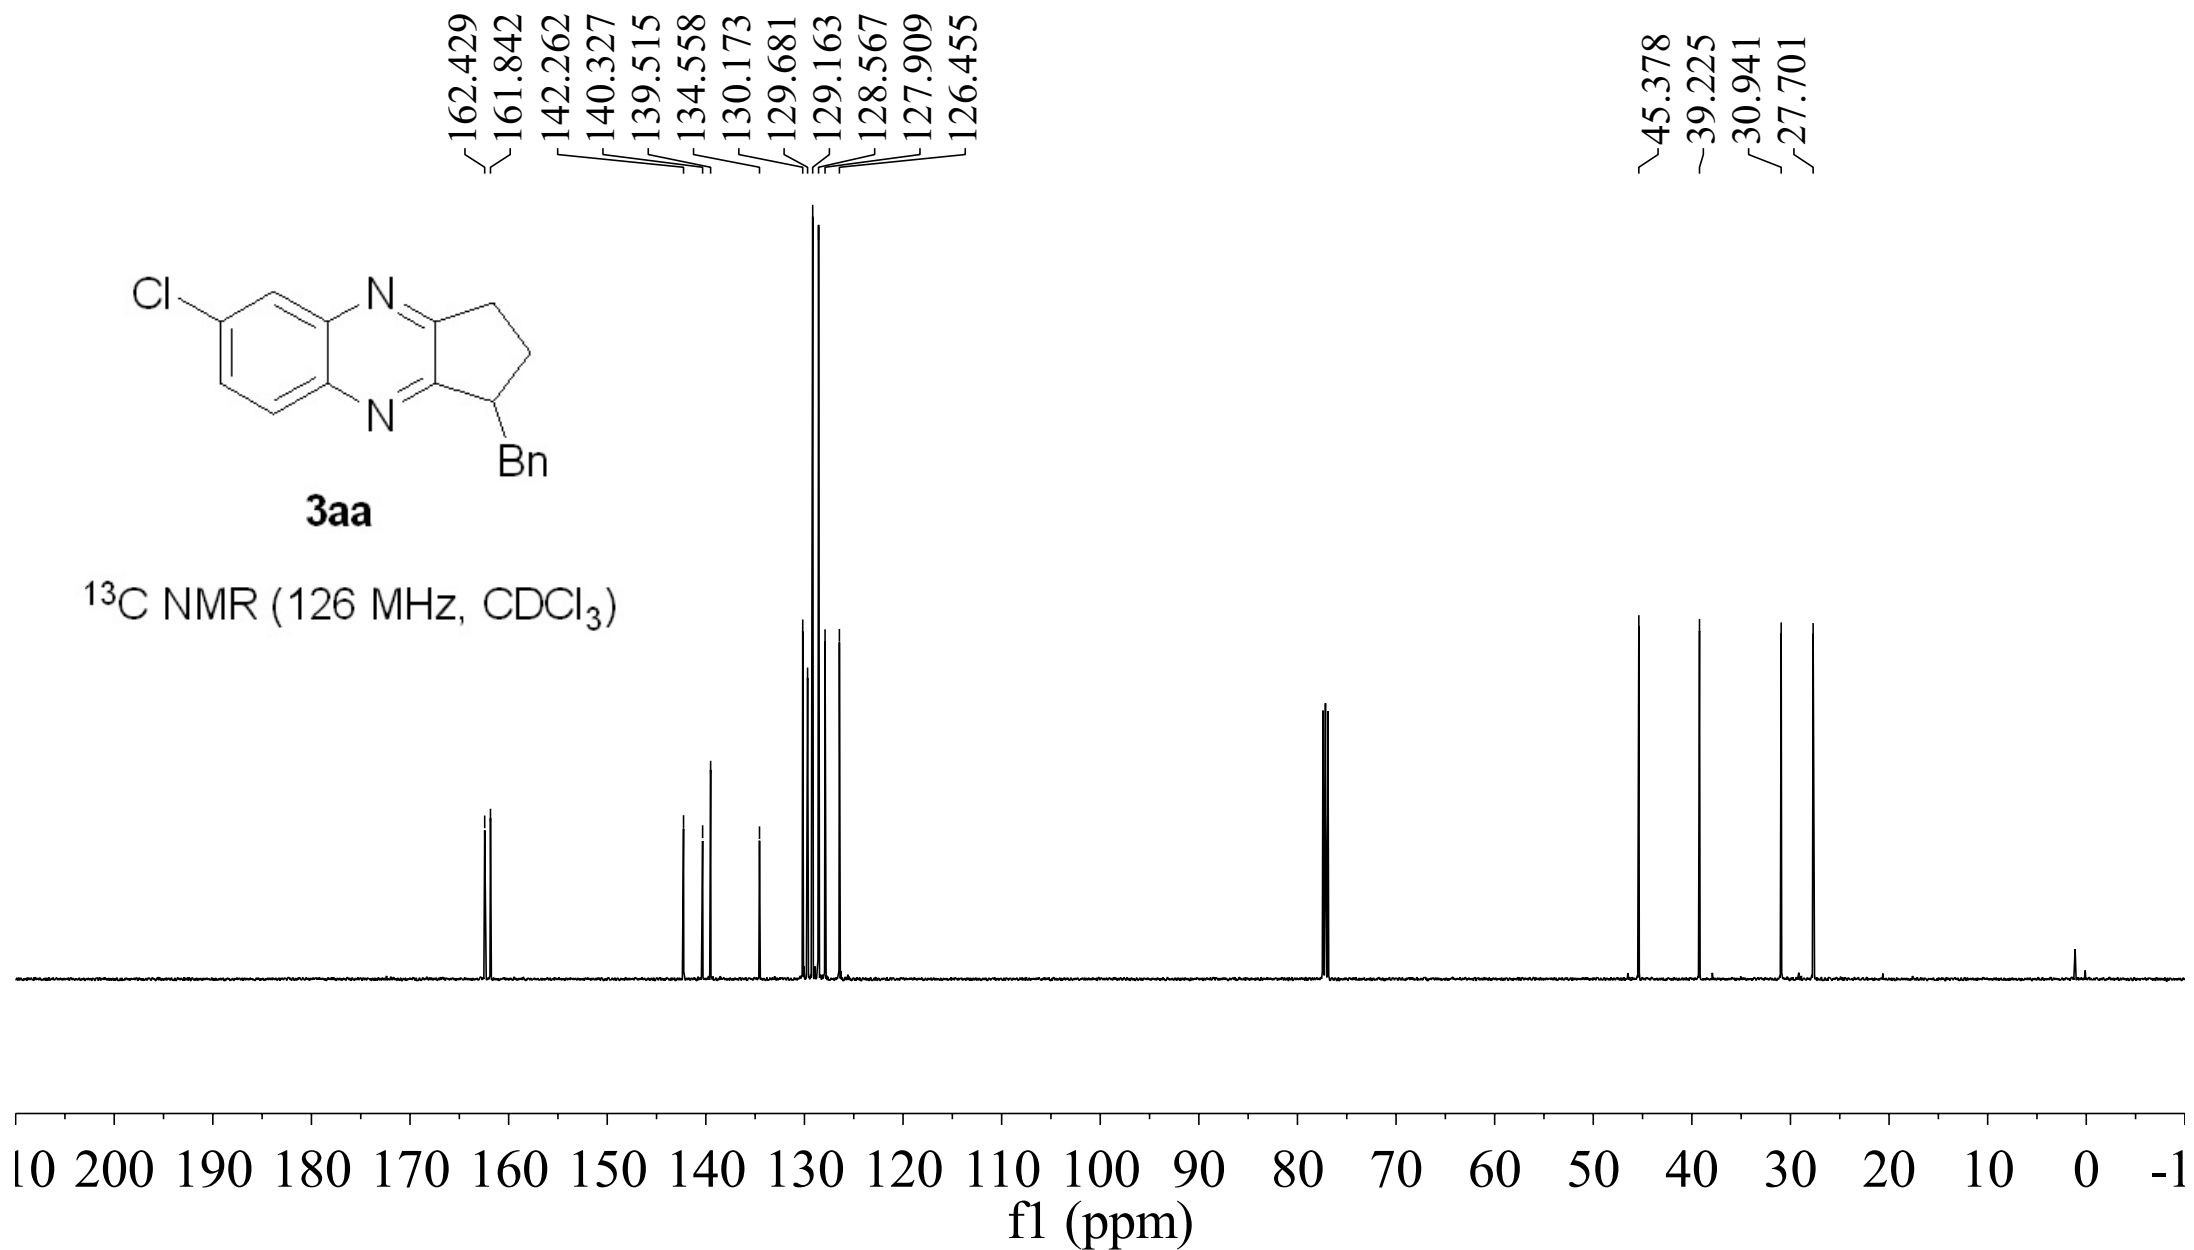



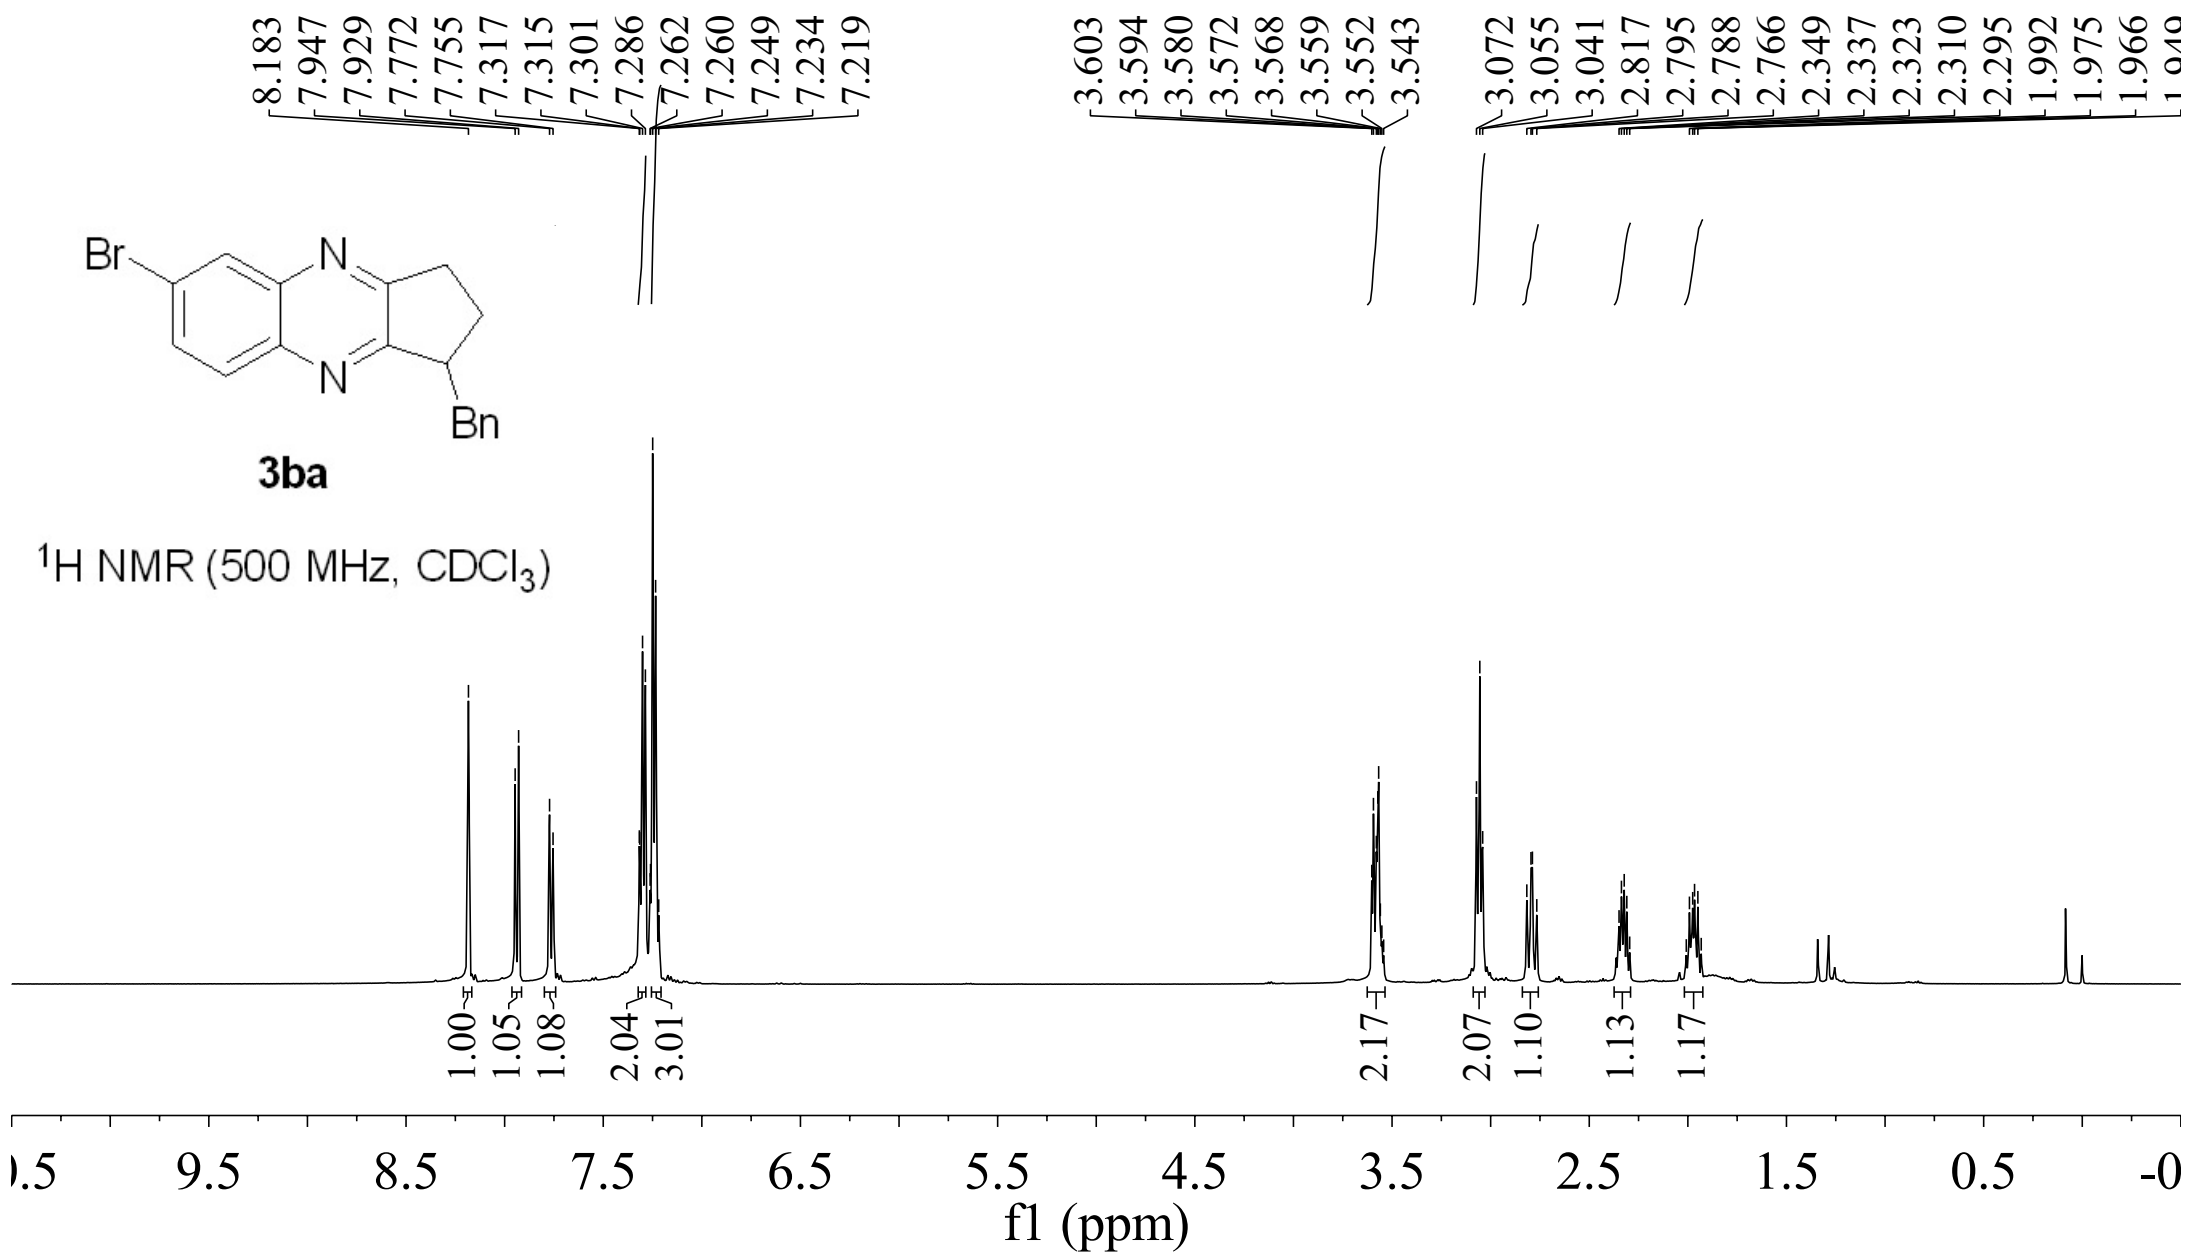

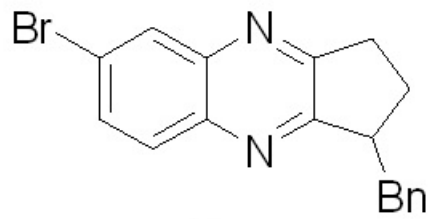

**3ba**

$^{13}\text{C}$  NMR (126 MHz,  $\text{CDCl}_3$ )

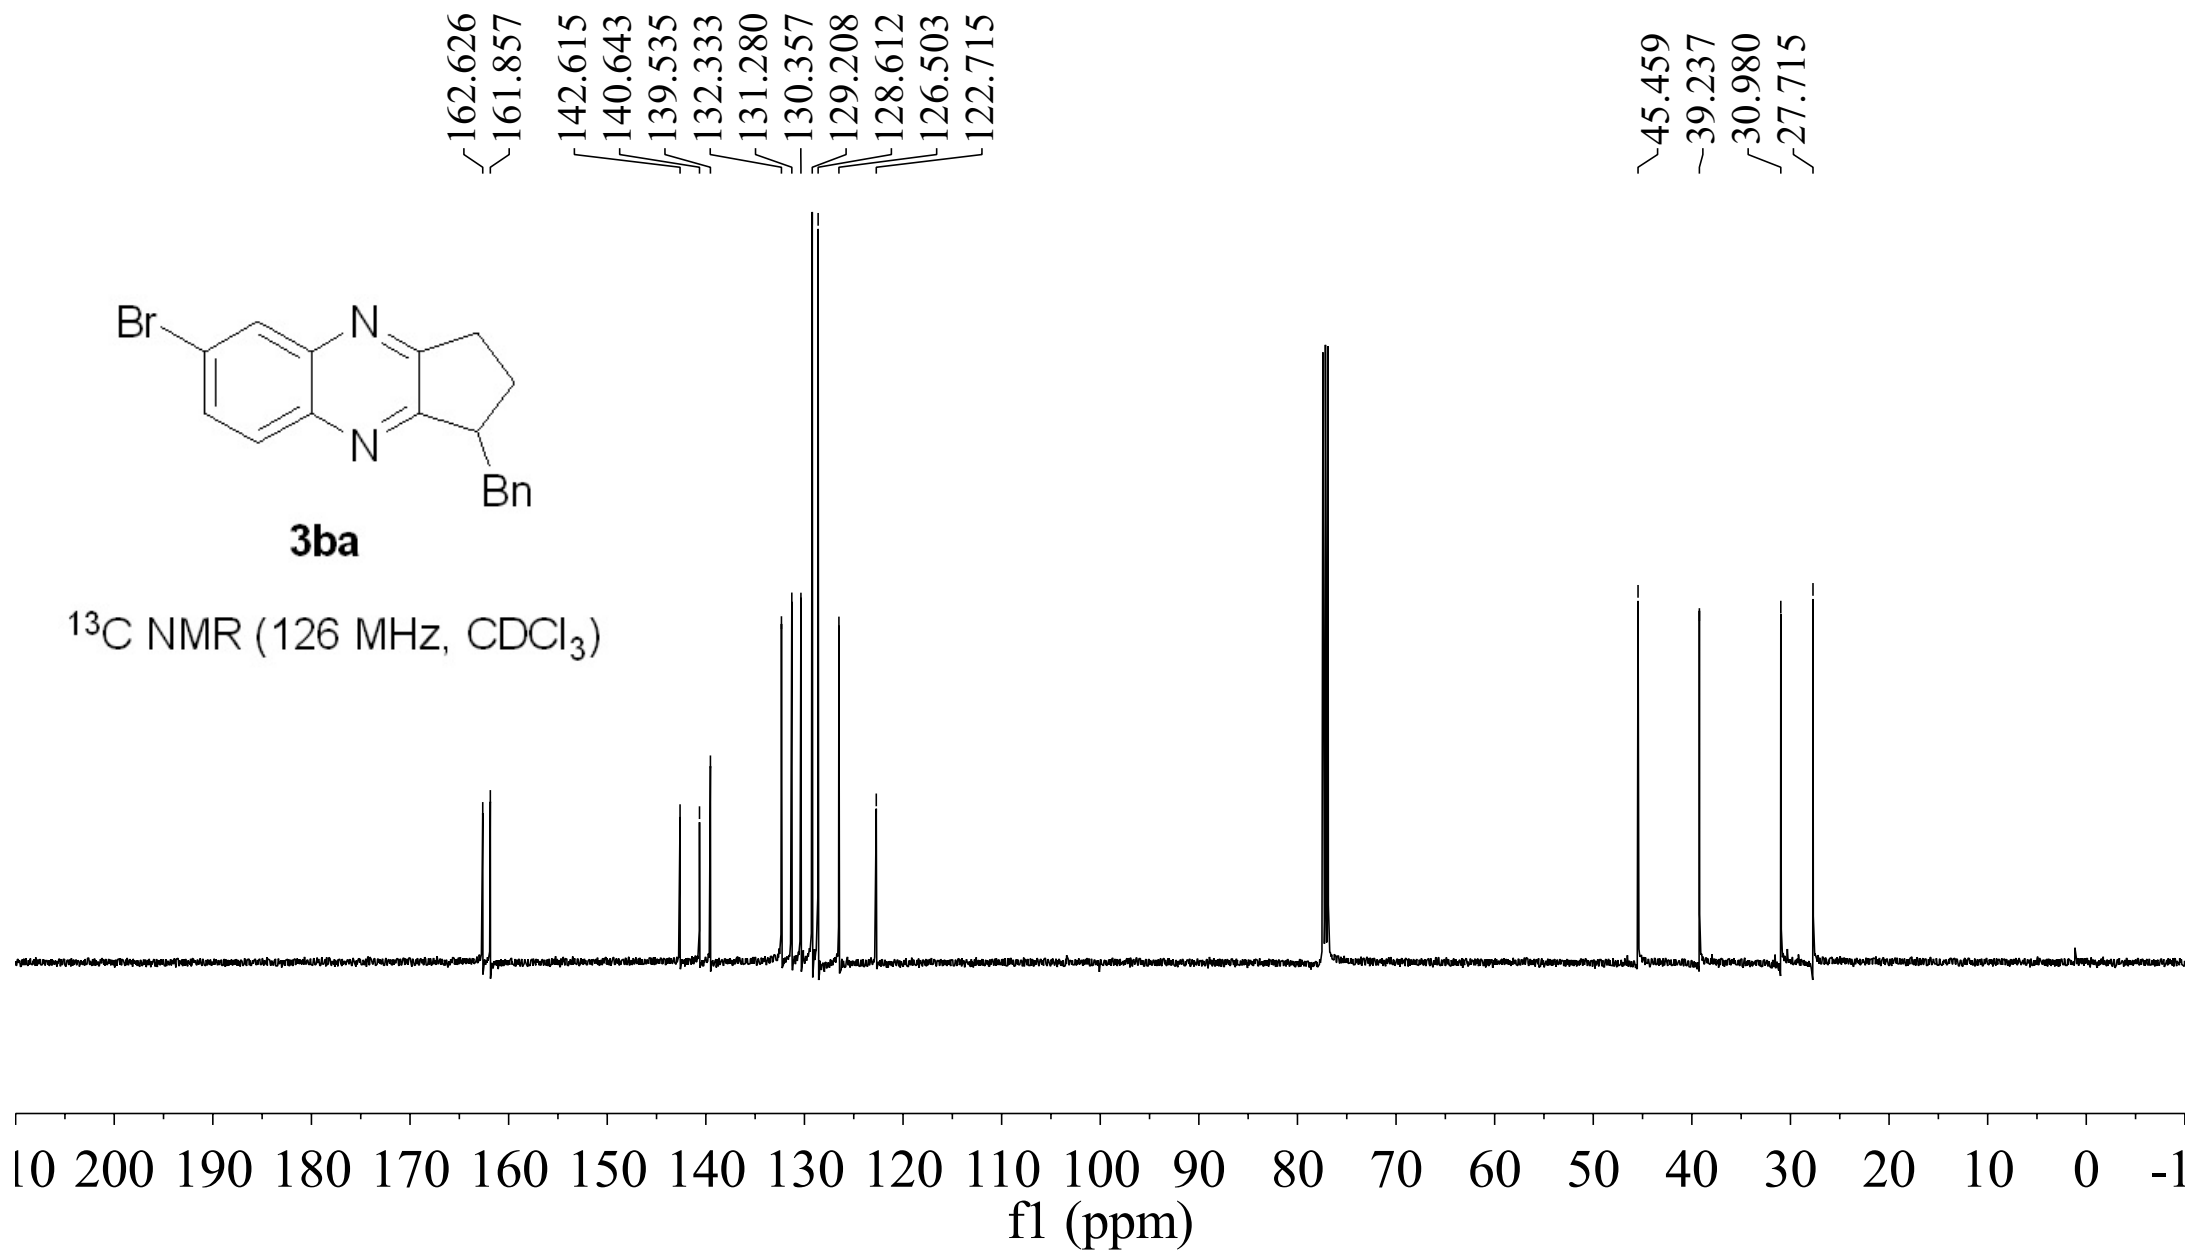

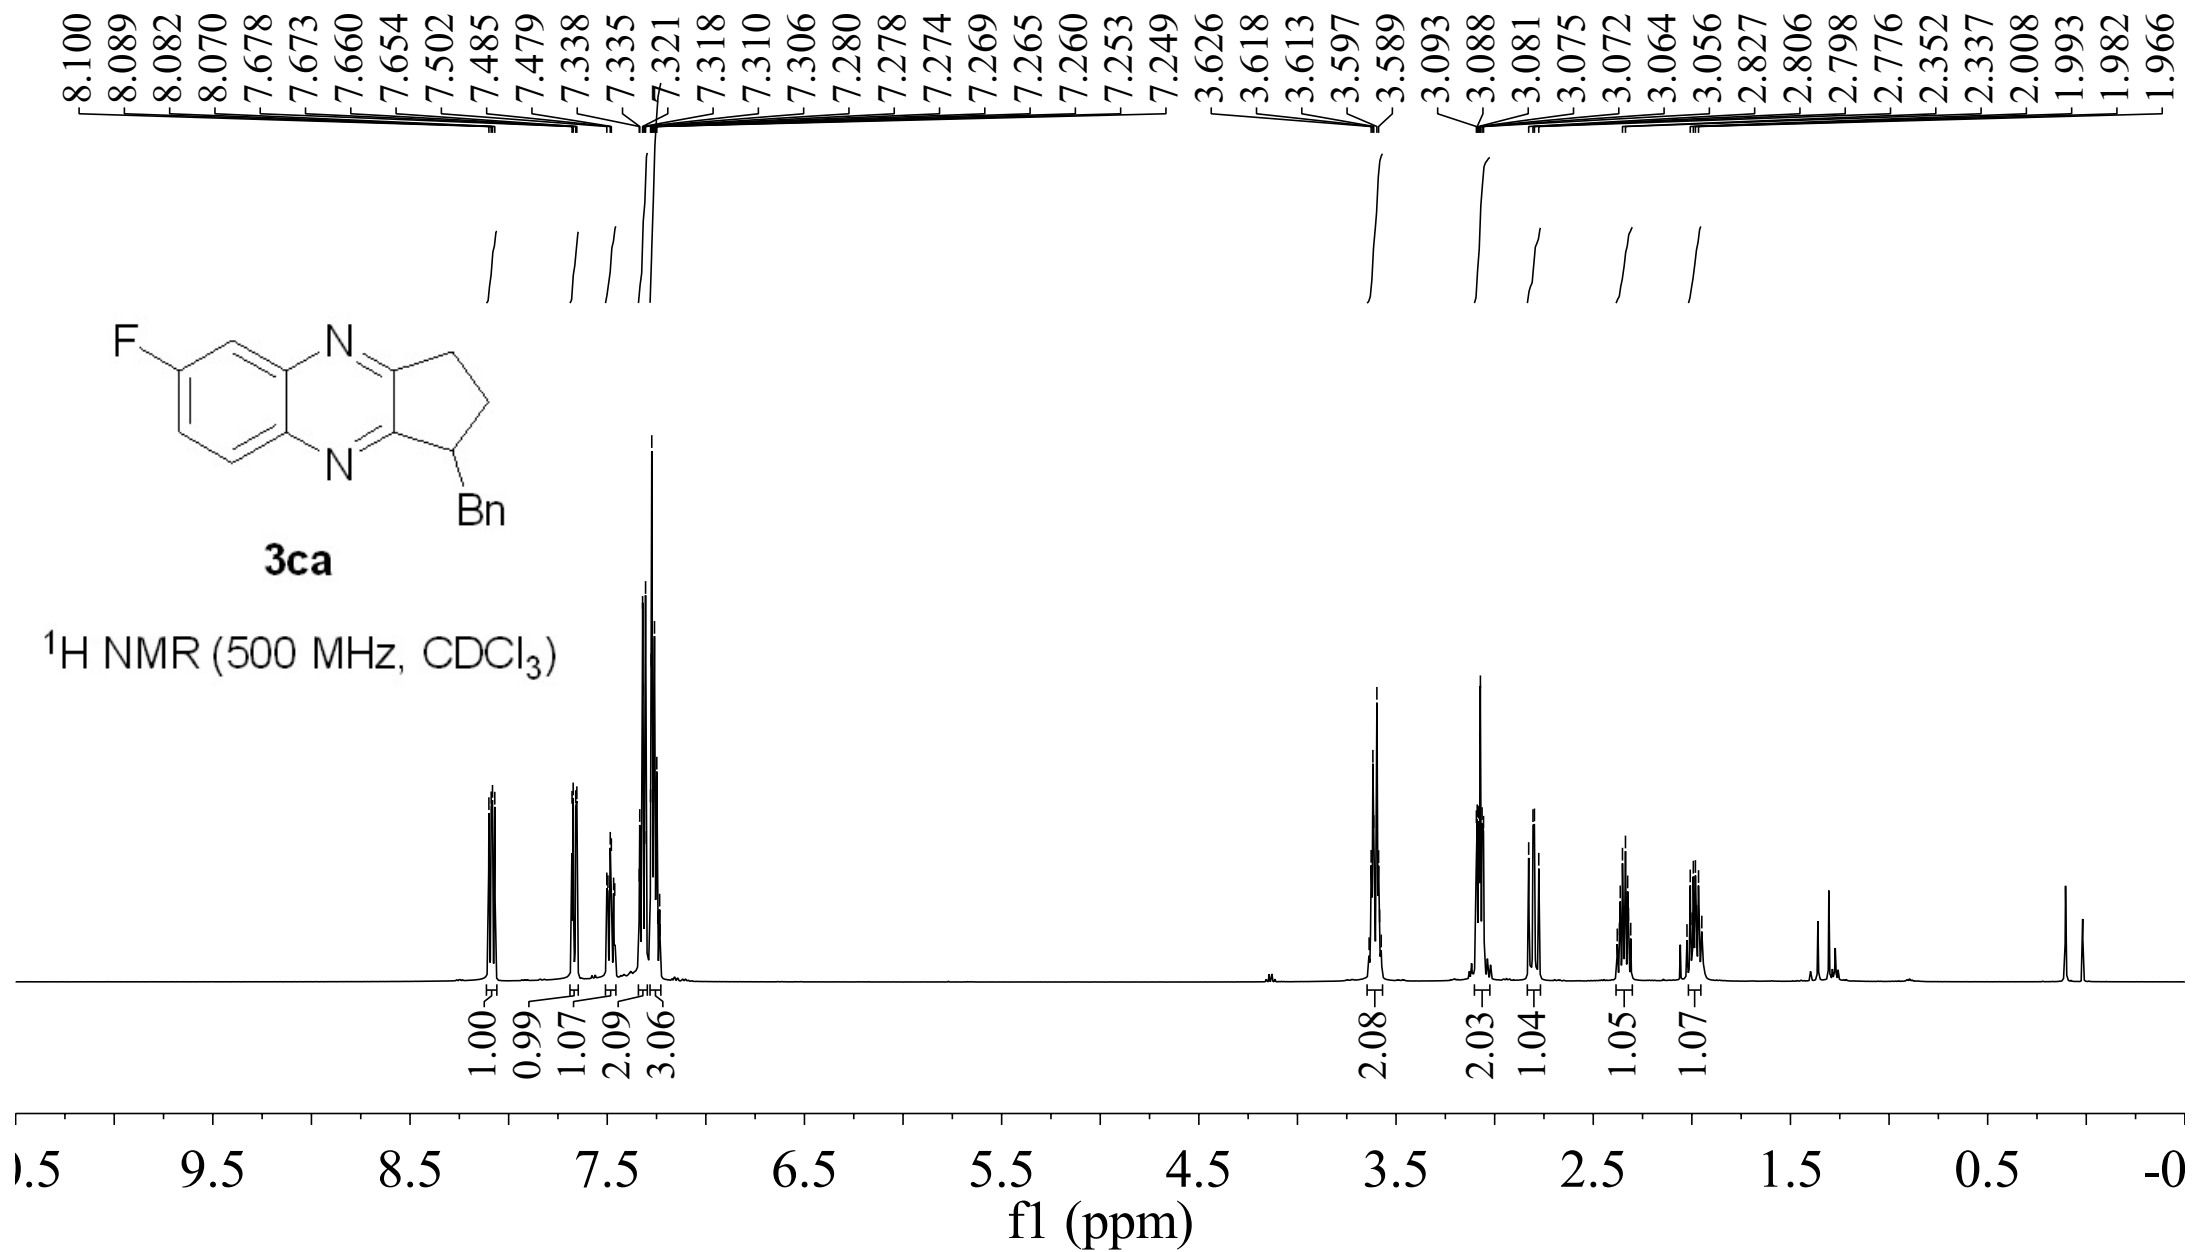

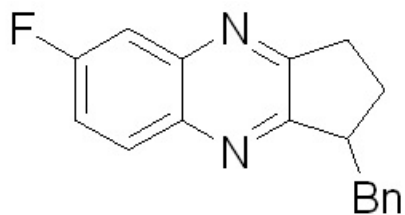

**3ca**

$^{13}\text{C}$  NMR (126 MHz,  $\text{CDCl}_3$ )

163.304  
161.784  
161.636  
161.611  
161.318  
142.758  
142.657  
139.619  
138.932  
130.869  
130.790  
129.207  
128.593  
126.470  
118.848  
118.646  
112.847  
112.674

45.317  
39.328  
30.974  
27.772



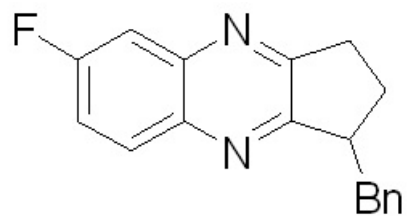

**3ca**

$^{19}\text{F}$  NMR (471 MHz,  $\text{CDCl}_3$ )

--110.285



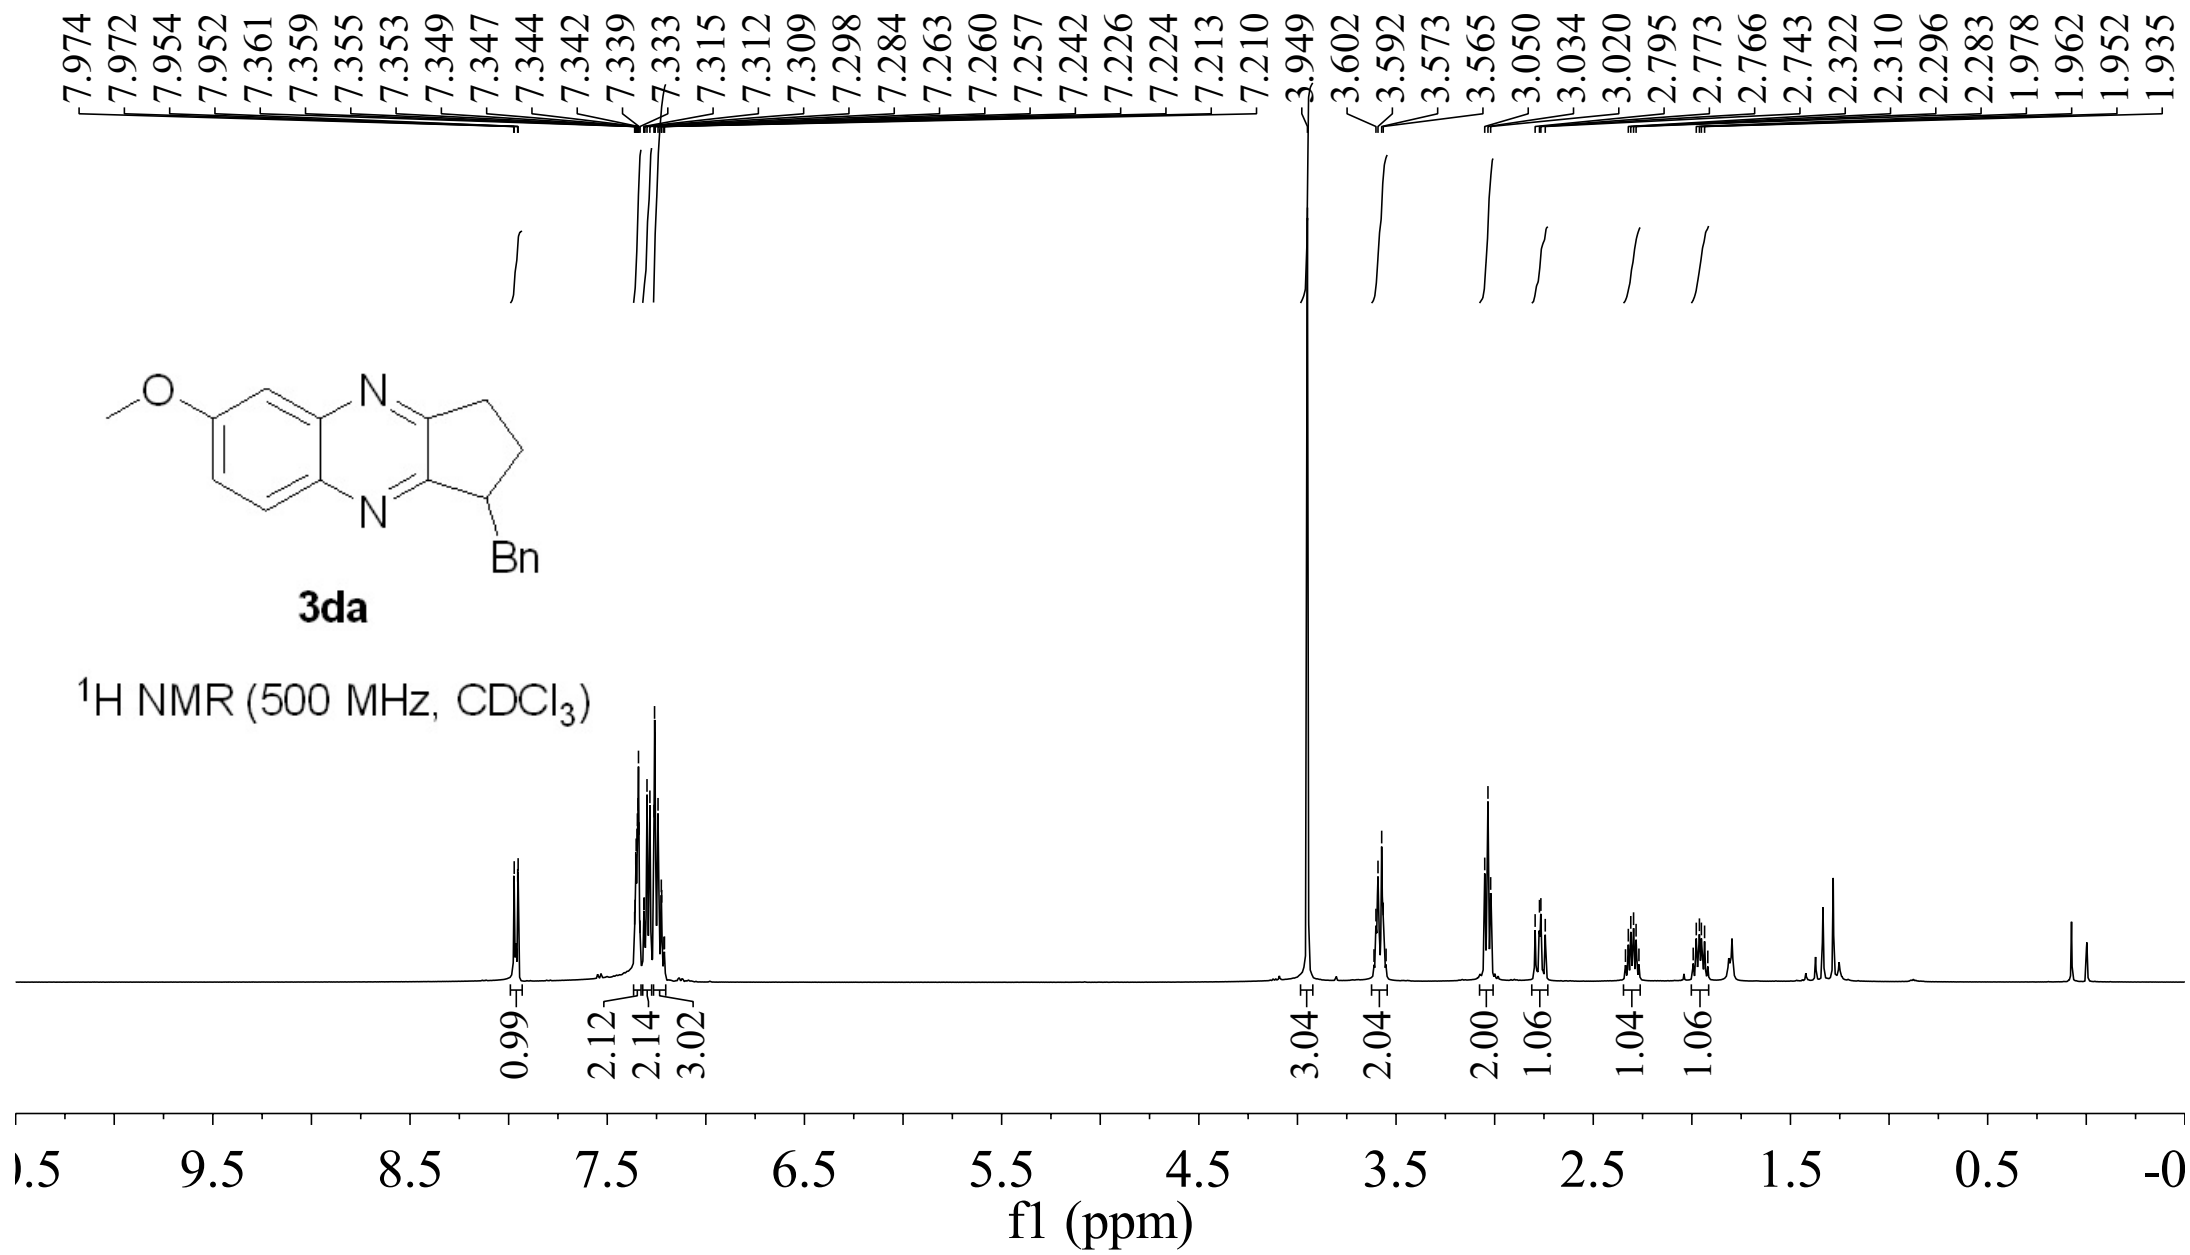

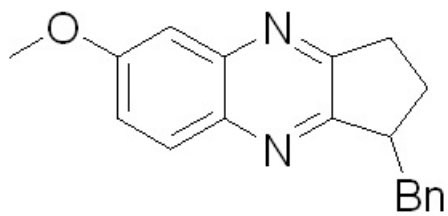

**3da**

<sup>13</sup>C NMR (126 MHz, CDCl<sub>3</sub>)

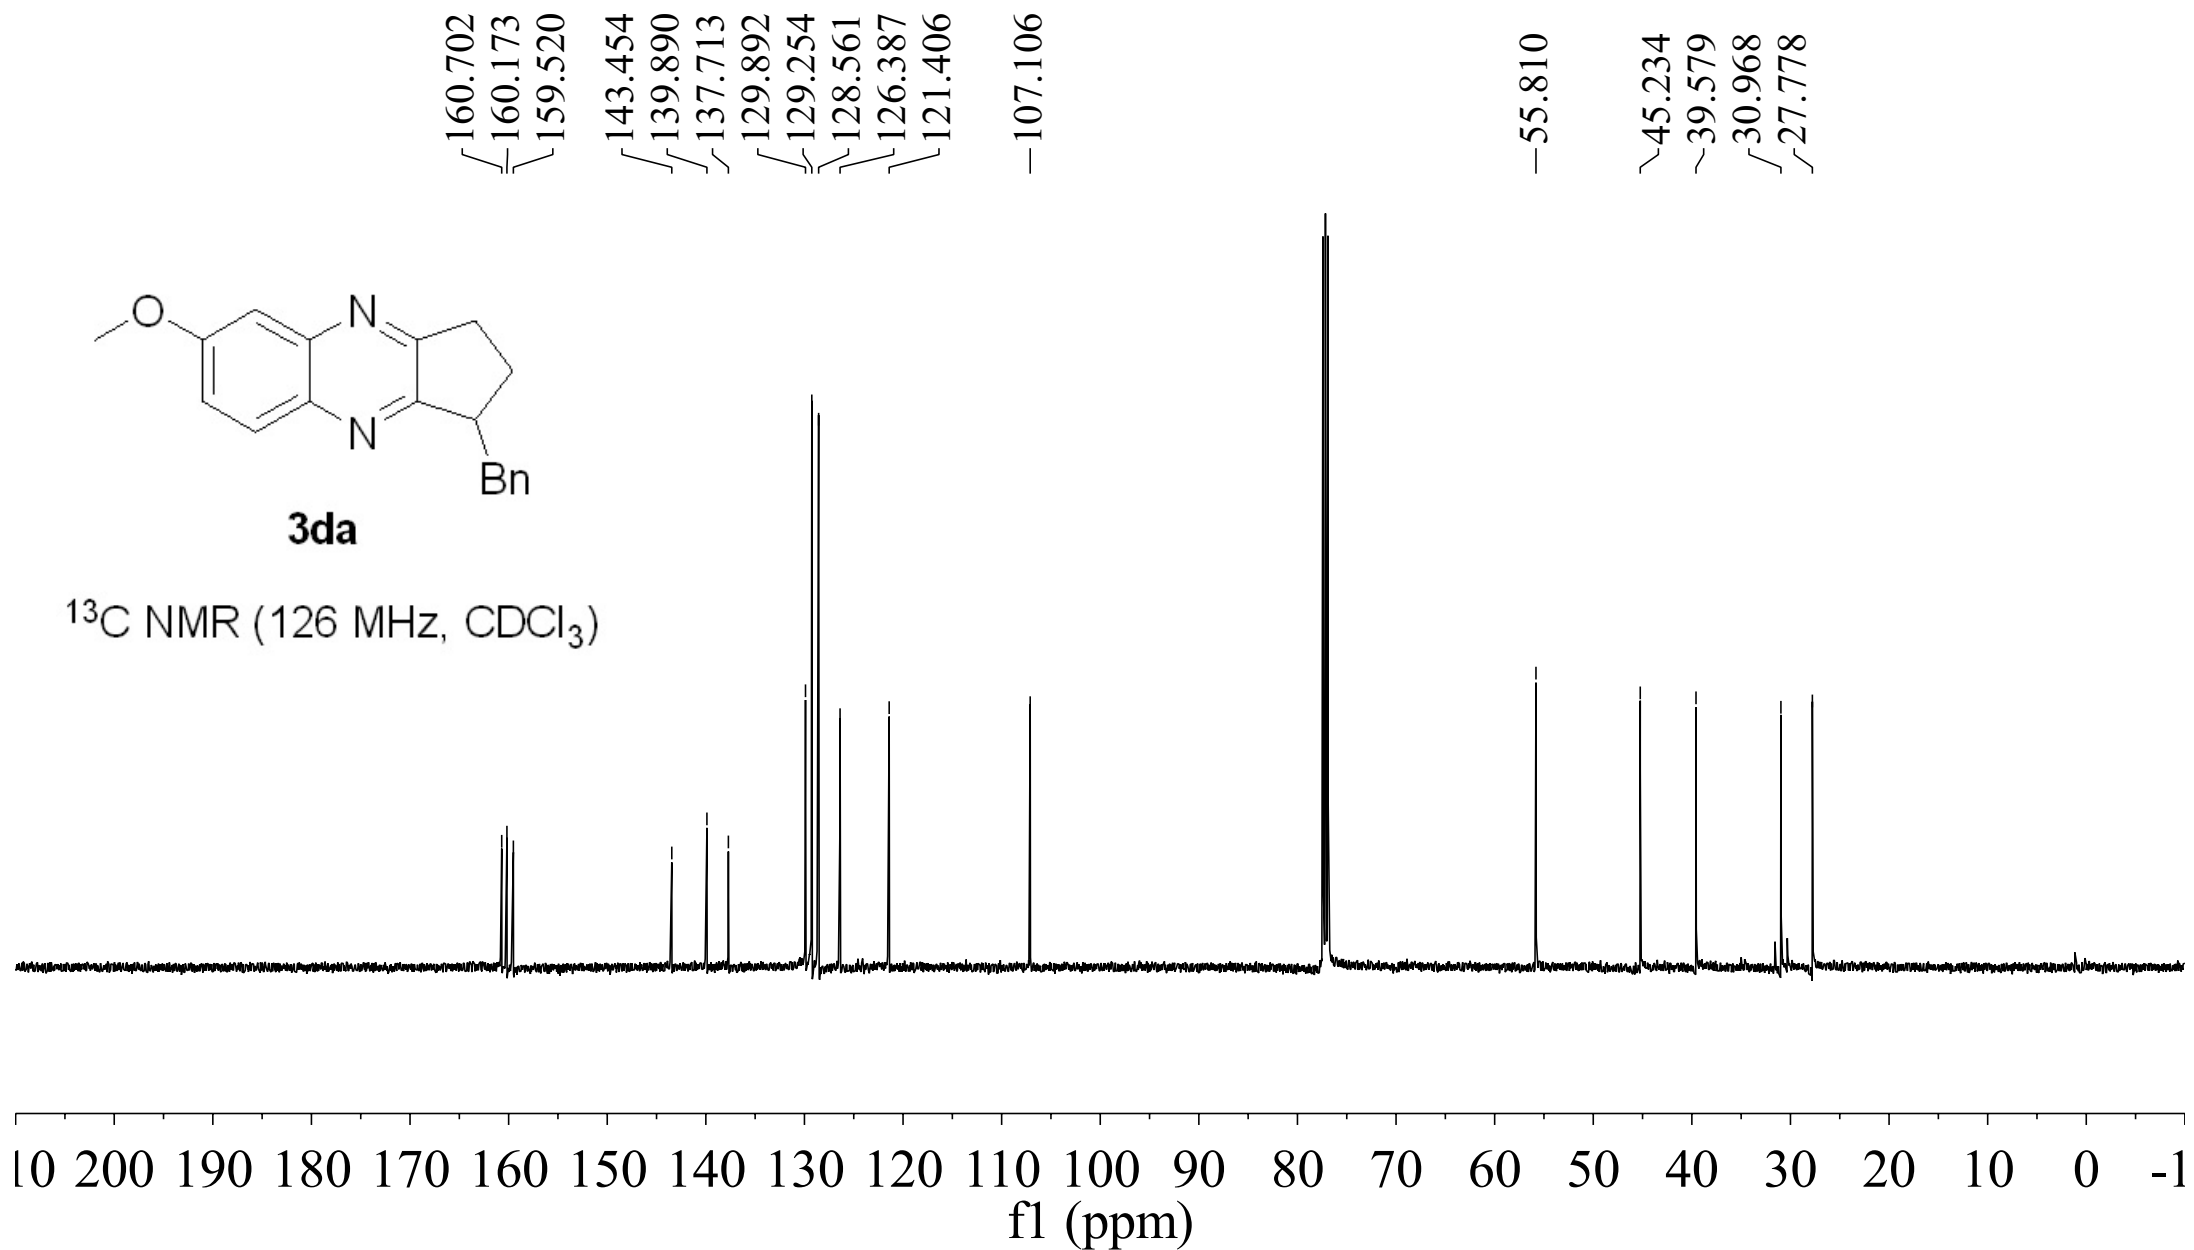

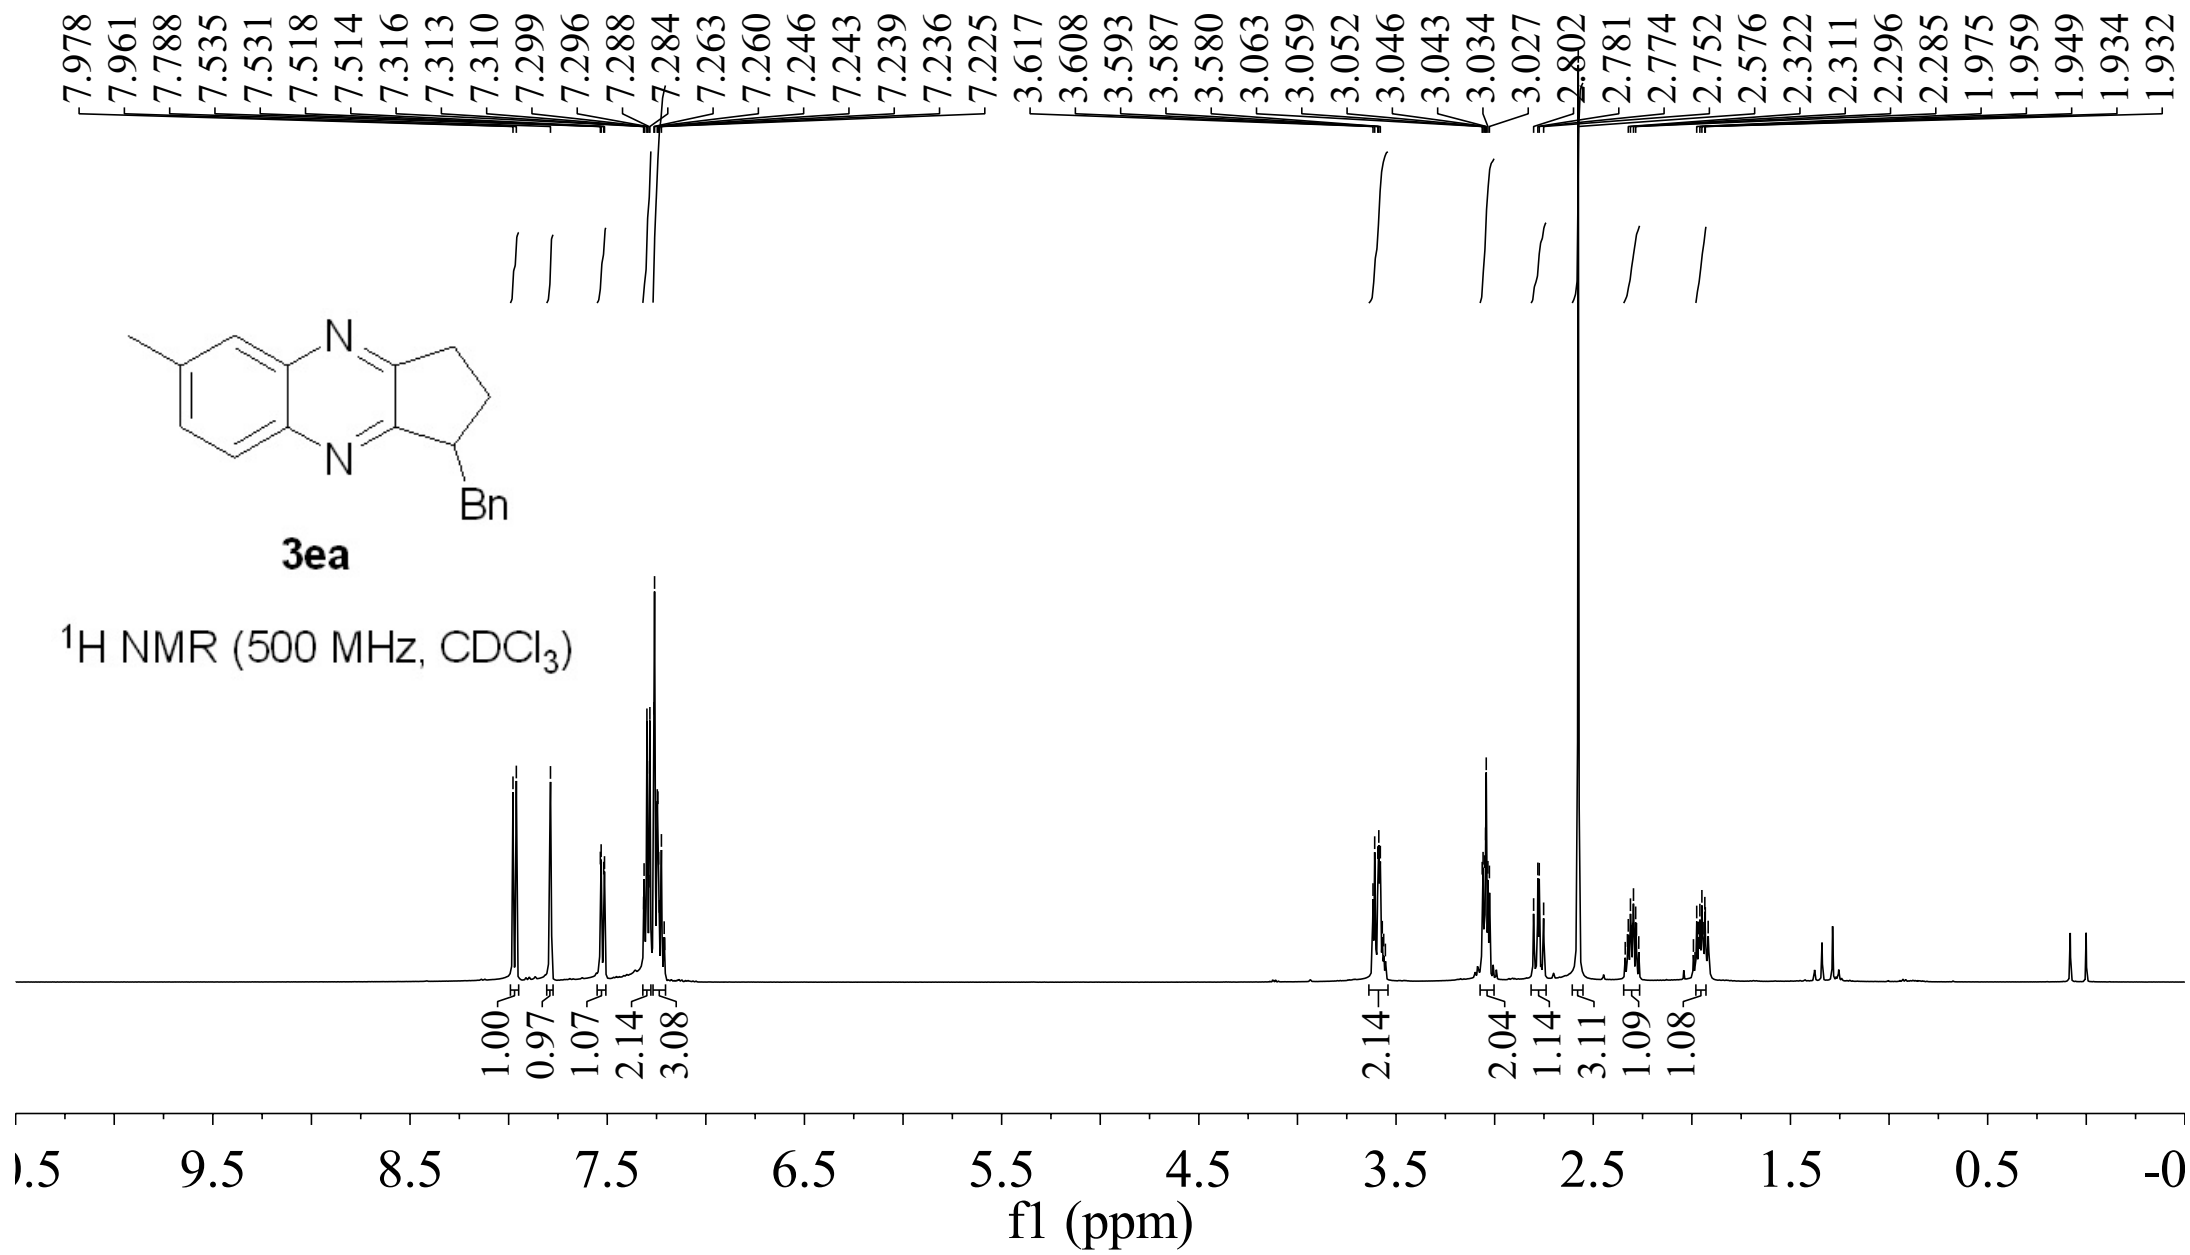



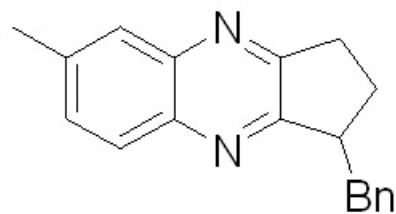

**3ea**

$^{13}\text{C}$  NMR (126 MHz,  $\text{CDCl}_3$ )

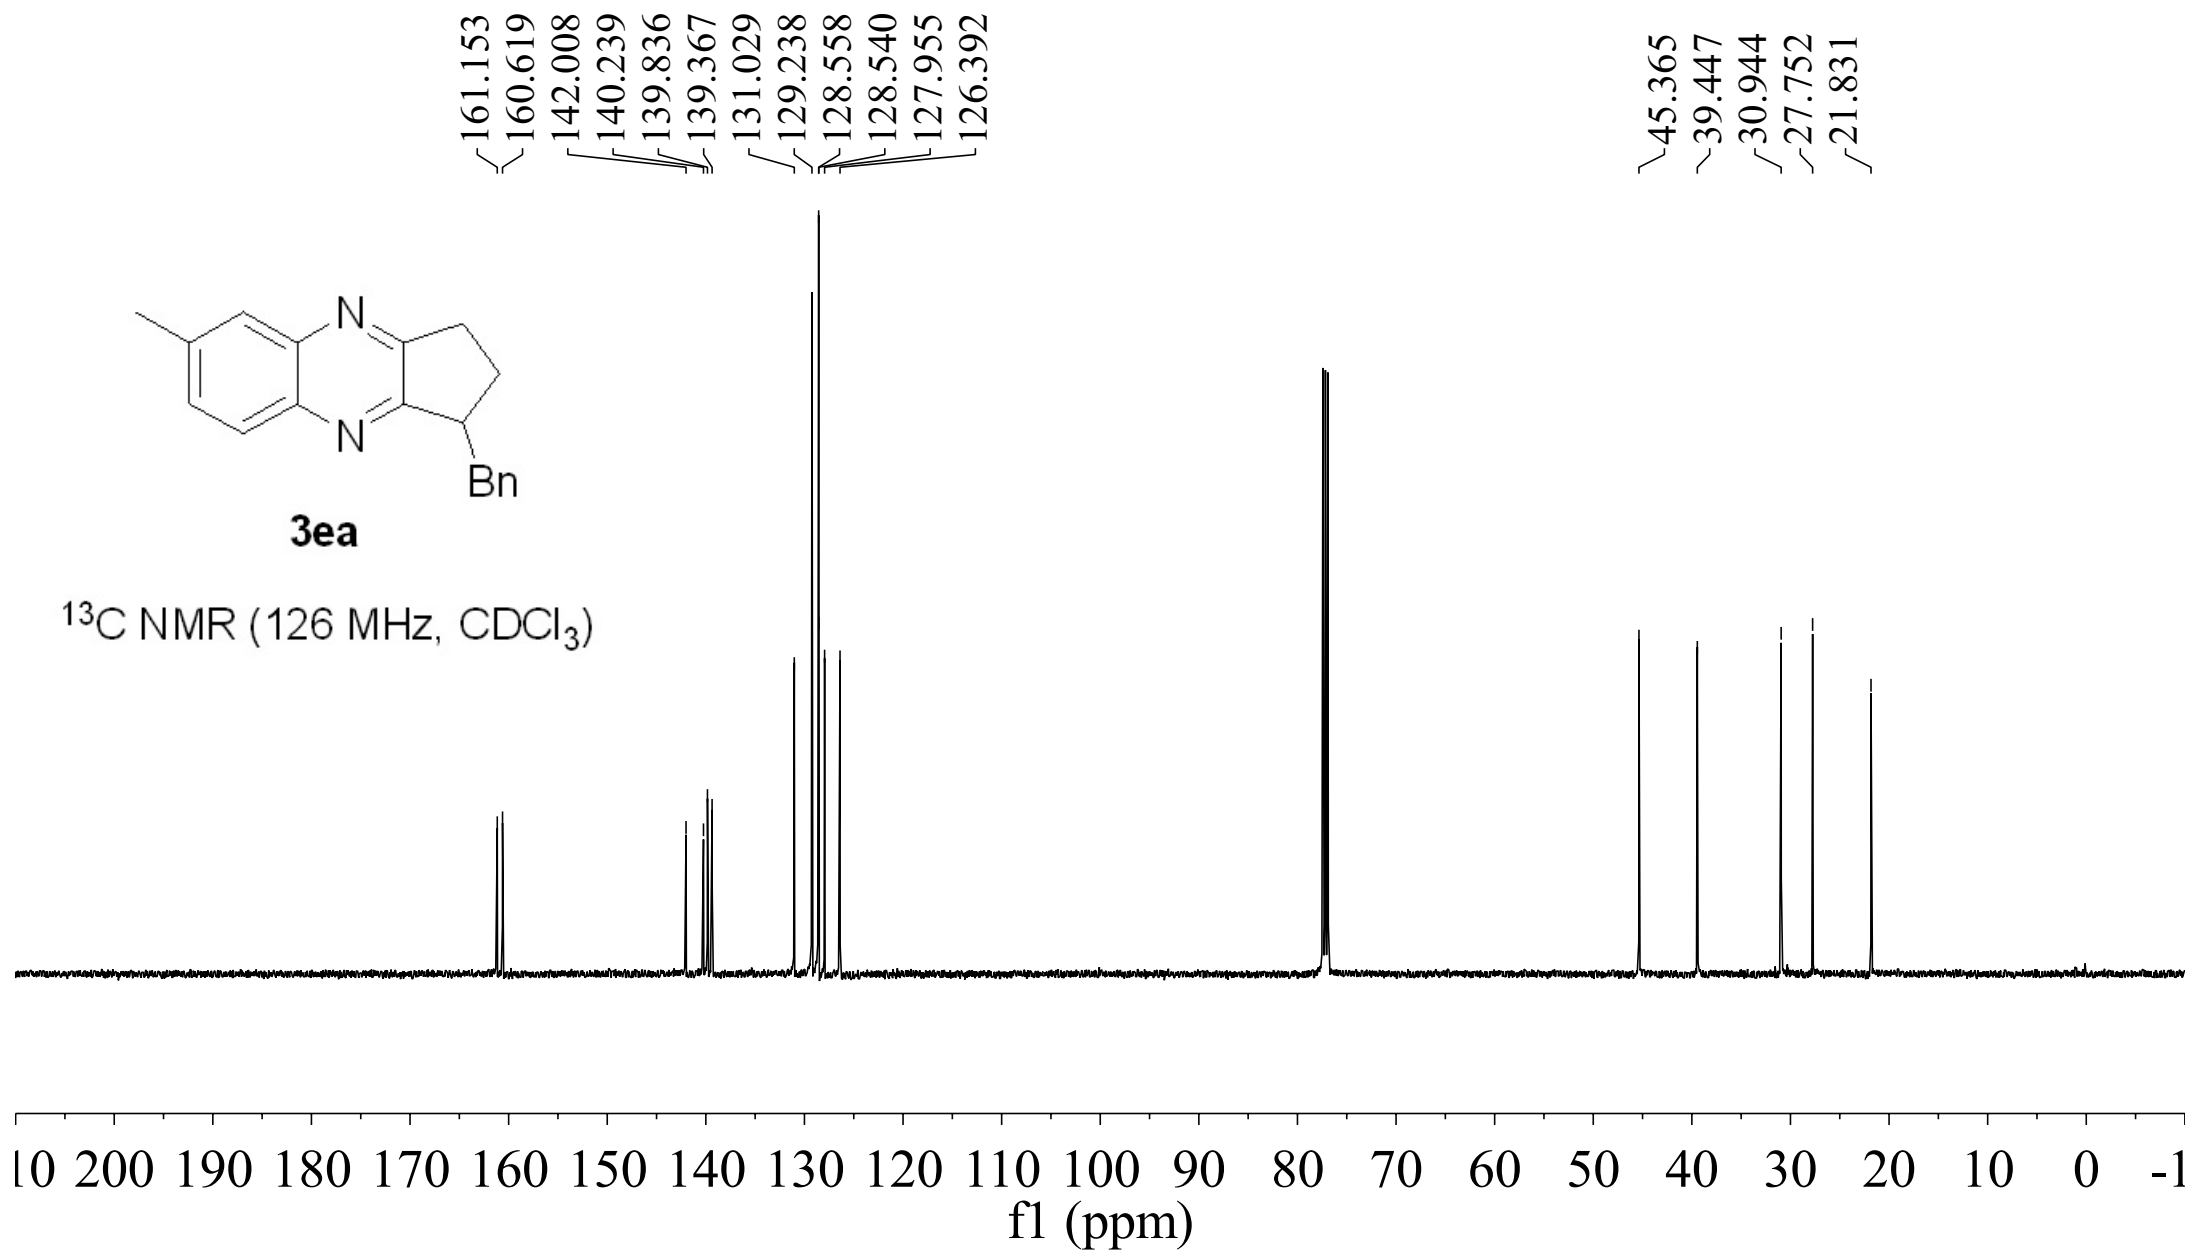

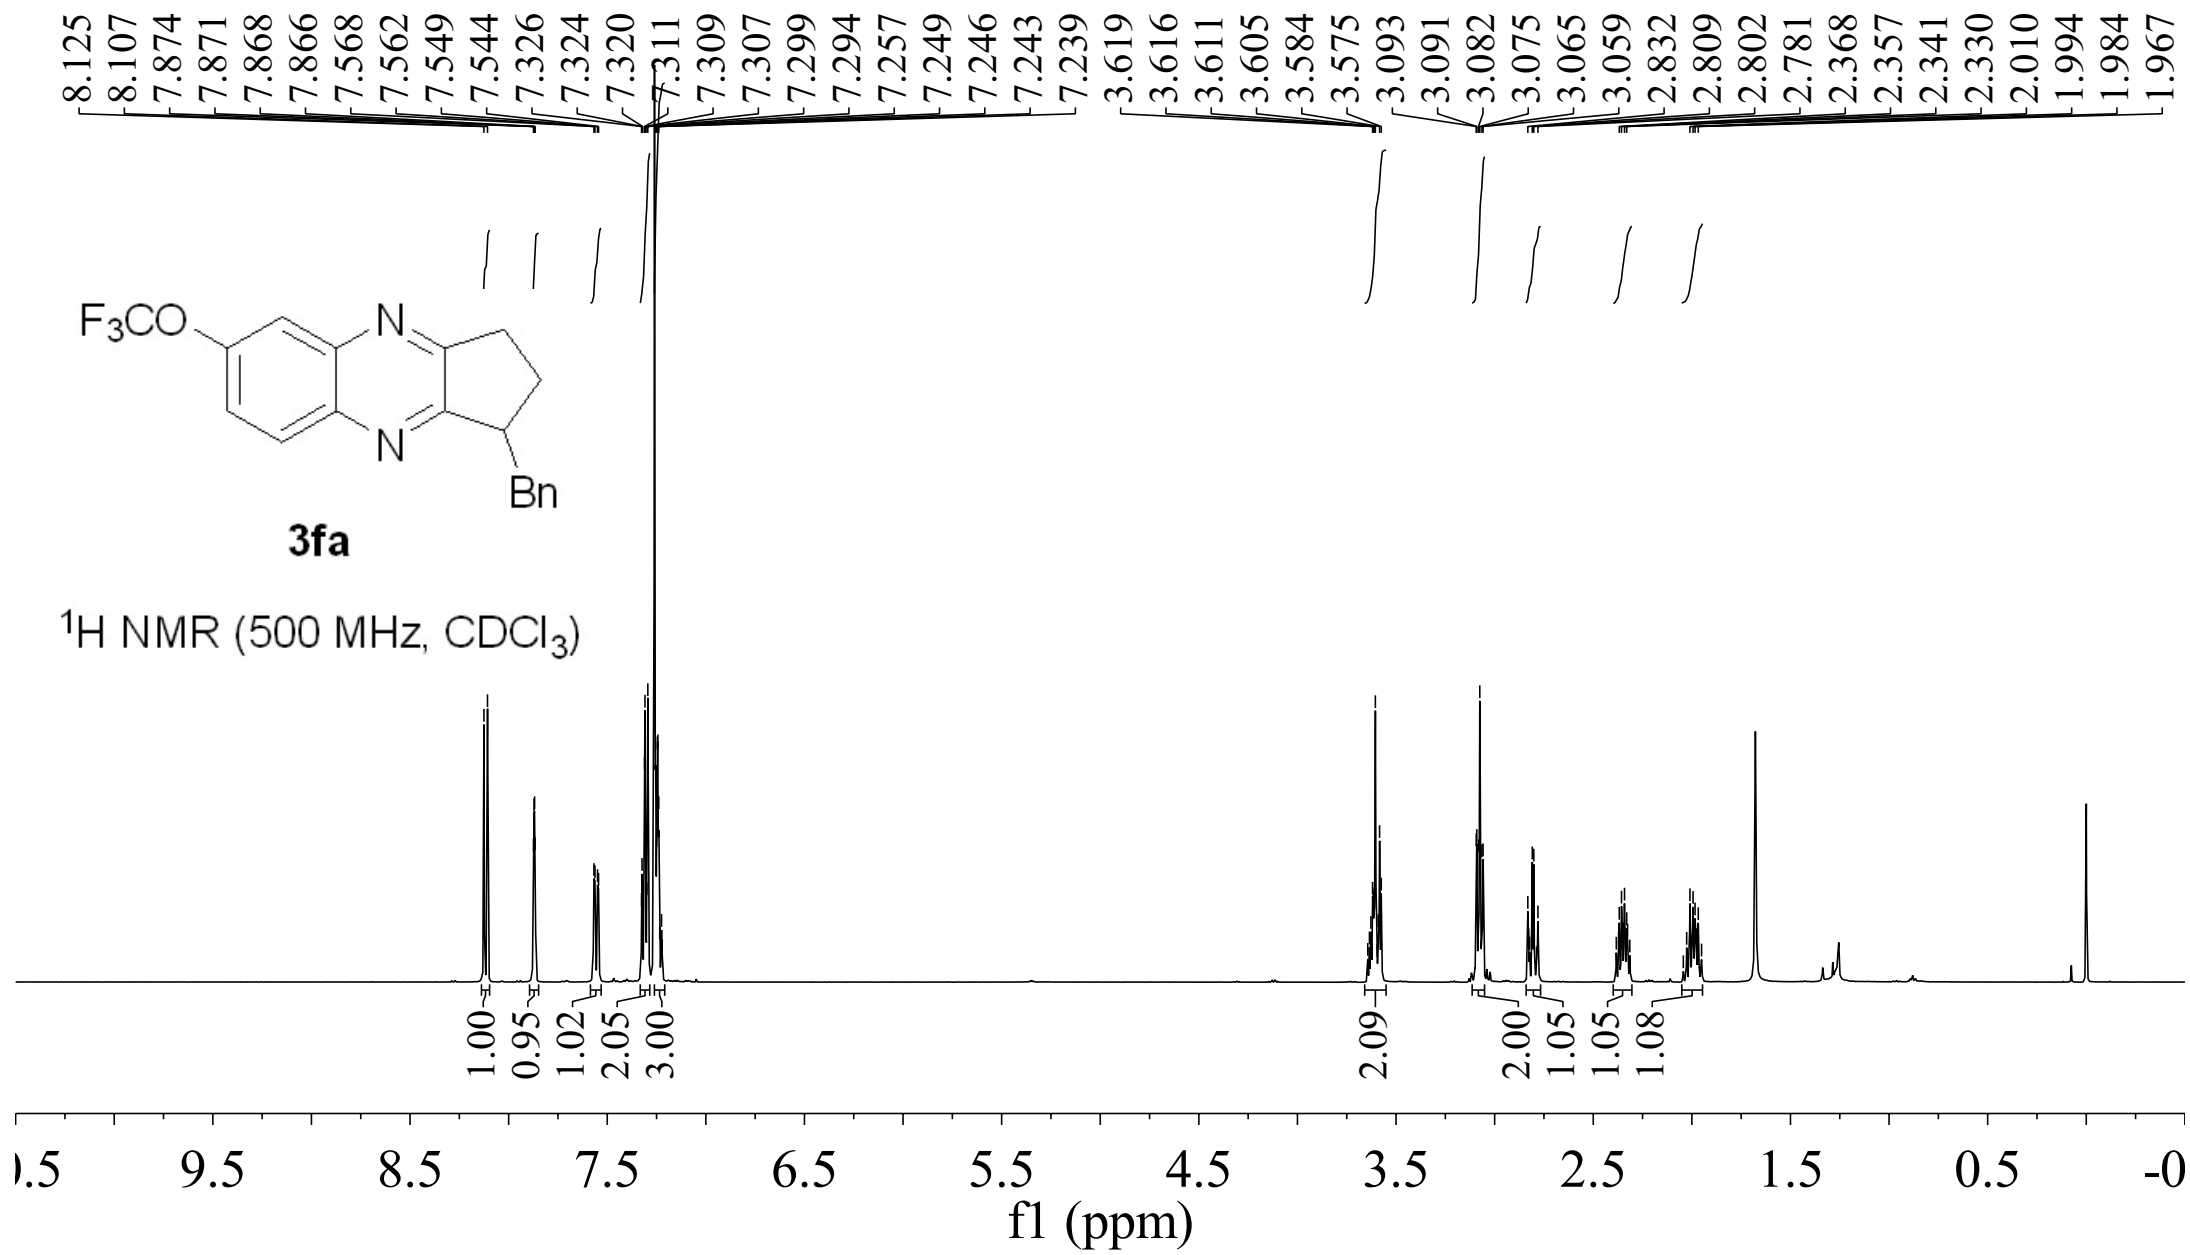

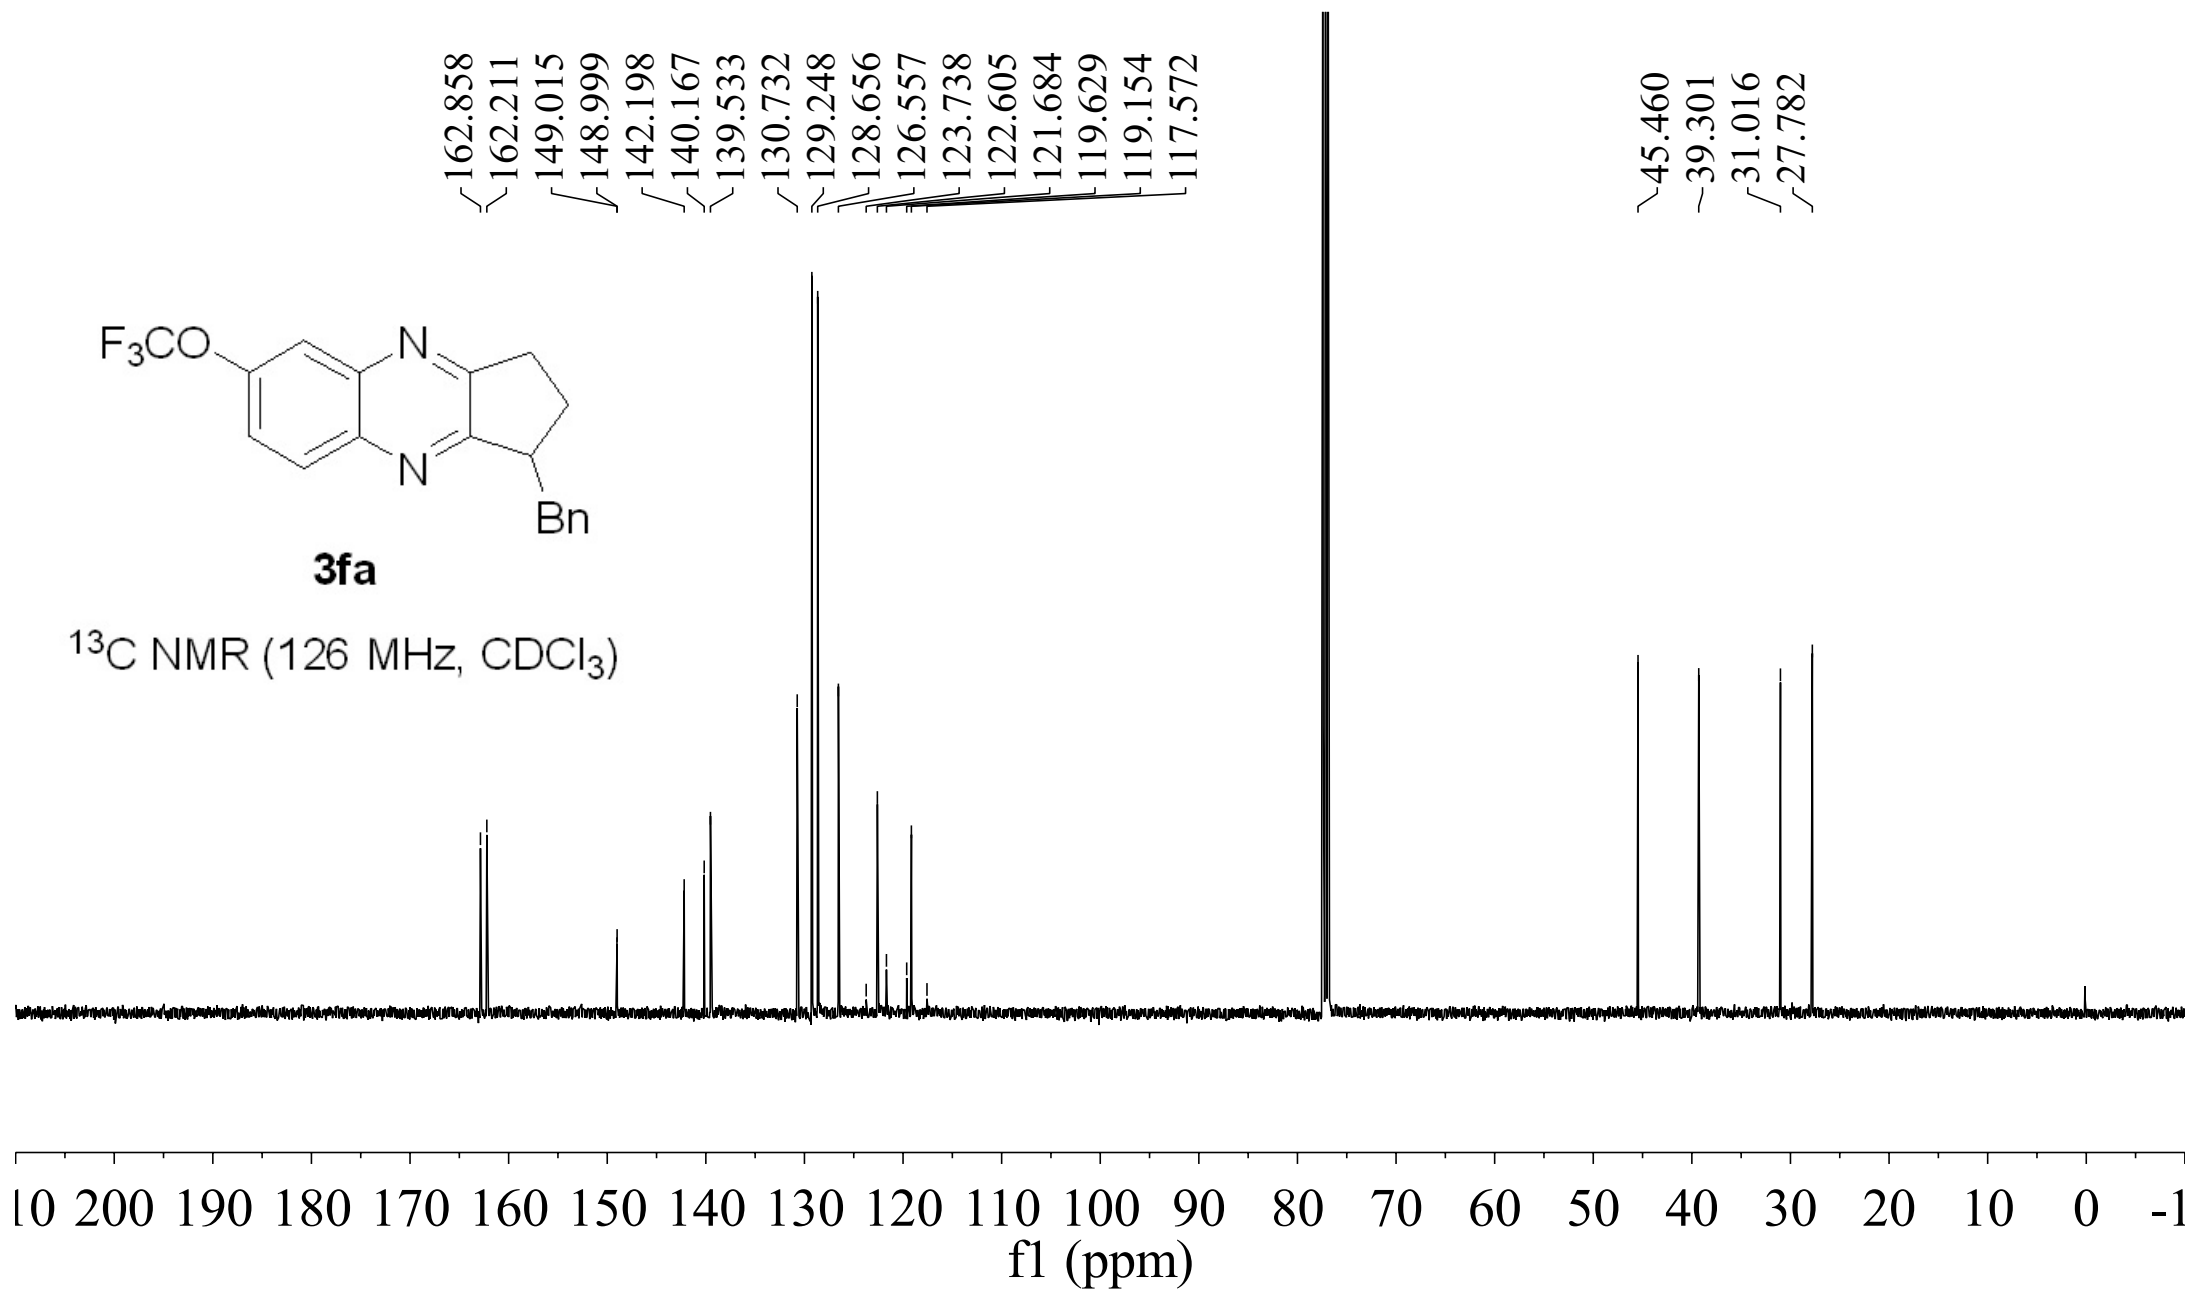

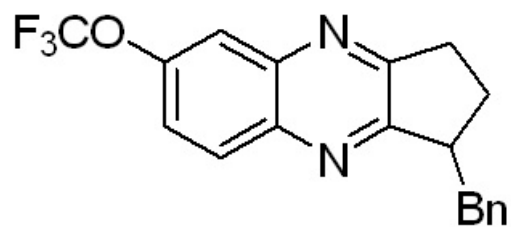

**3fa**

<sup>19</sup>F NMR (471 MHz, CDCl<sub>3</sub>)

-57.821



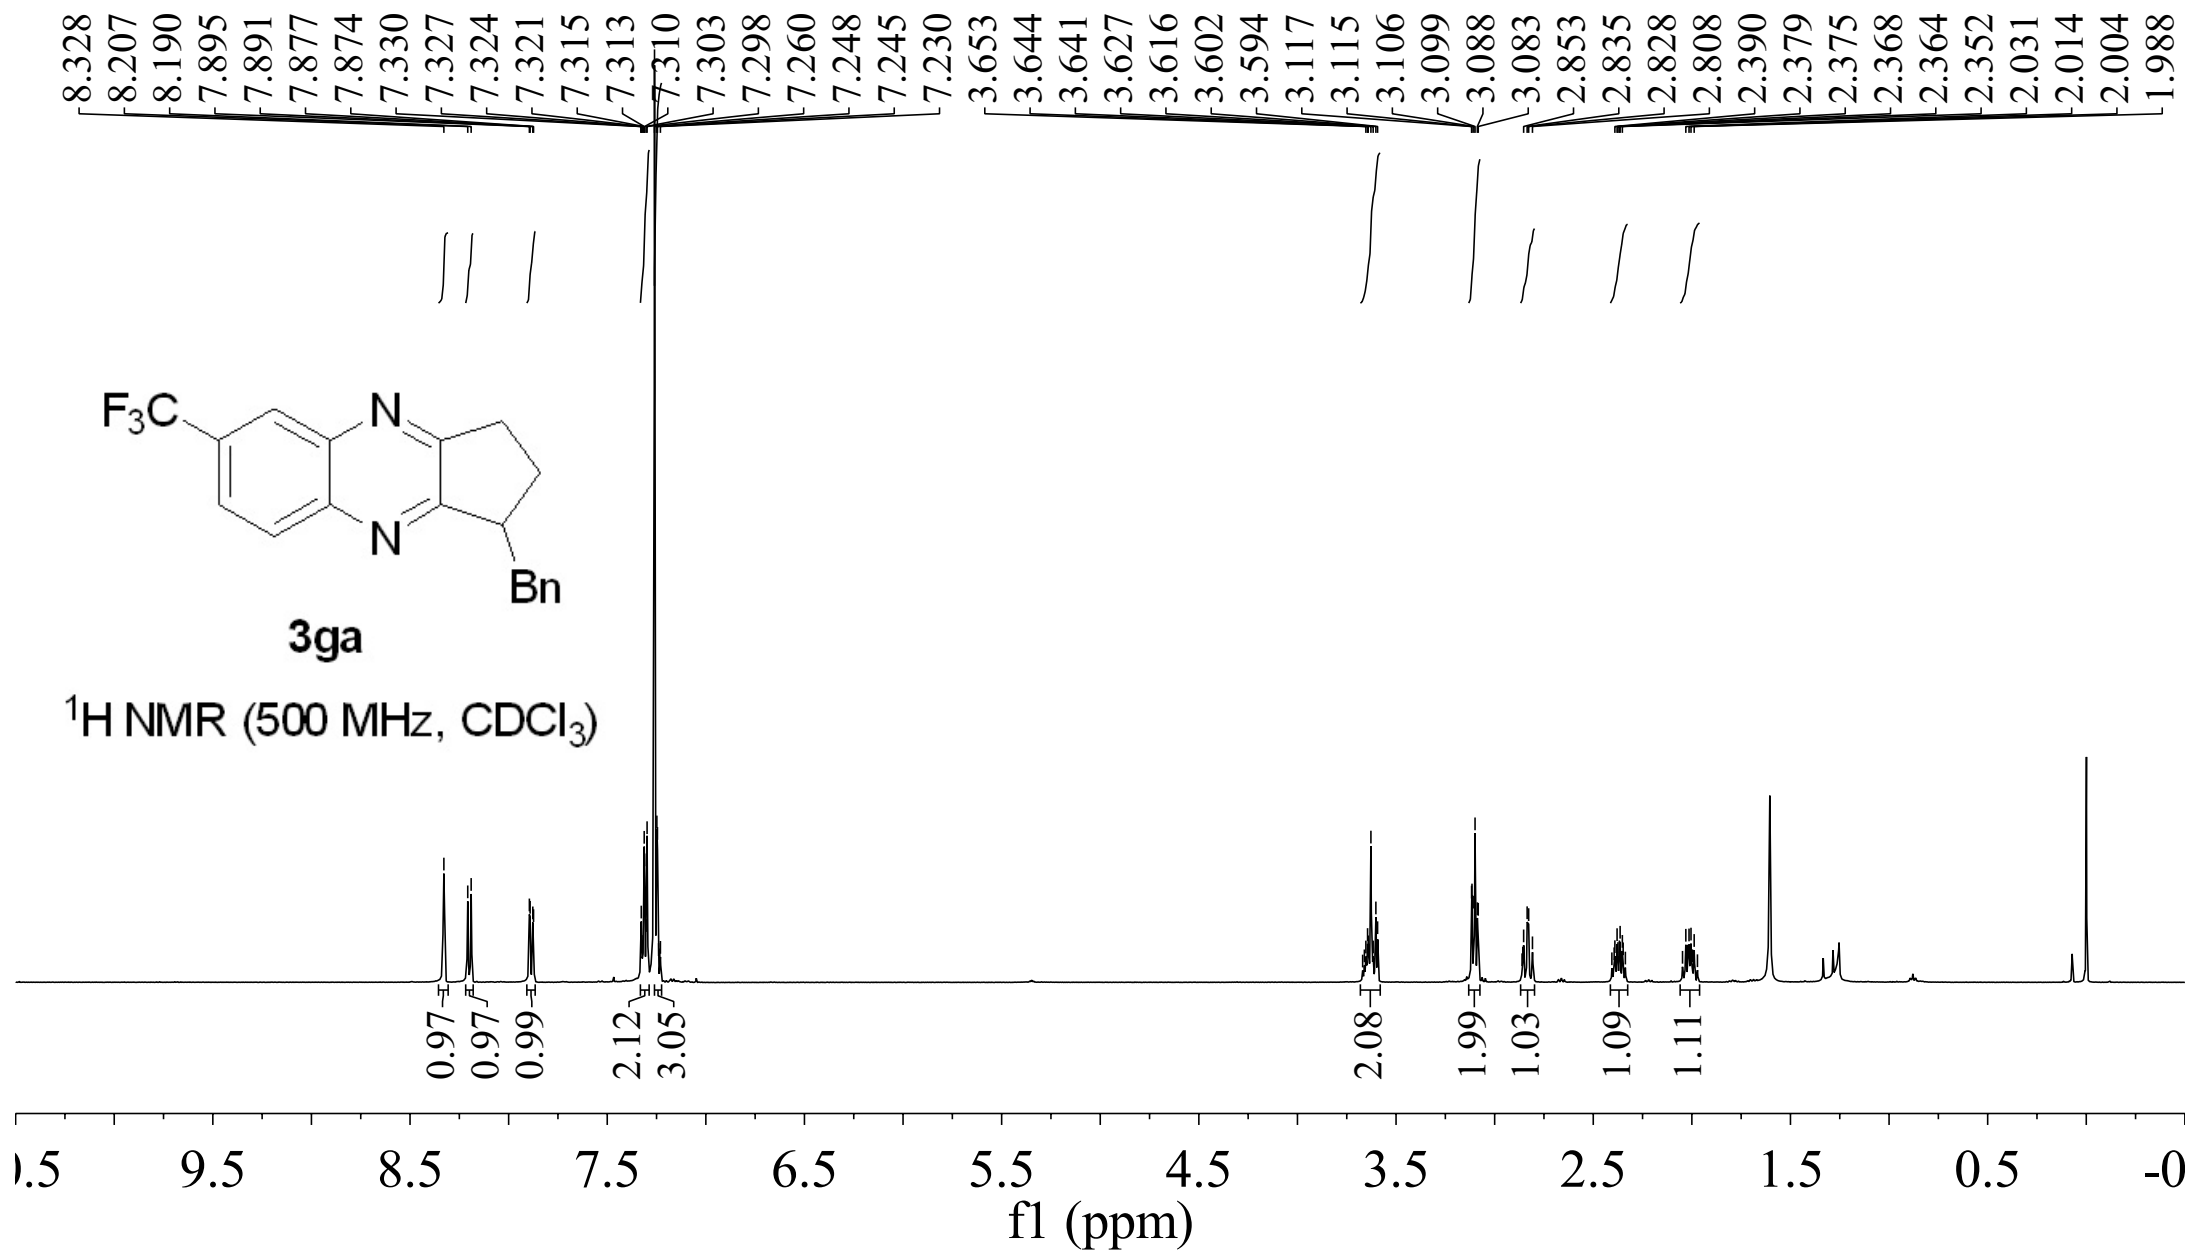

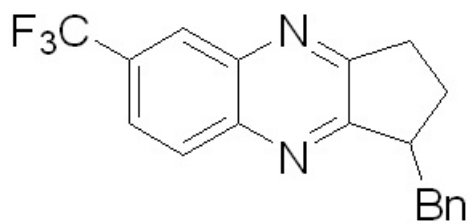

**3ga**

$^{13}\text{C}$  NMR (126 MHz,  $\text{CDCl}_3$ )

164.595  
162.607  
143.143  
141.103  
139.424  
130.256  
129.252  
128.689  
126.958  
126.924  
126.891  
126.856  
126.613  
125.042  
124.757  
124.734  
124.708  
124.683  
122.879

45.642  
39.200  
31.013  
27.755



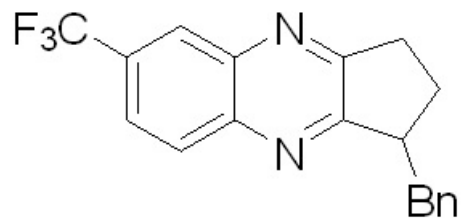

**3ga**

$^{19}F$  NMR (471 MHz,  $CDCl_3$ )

--62.368

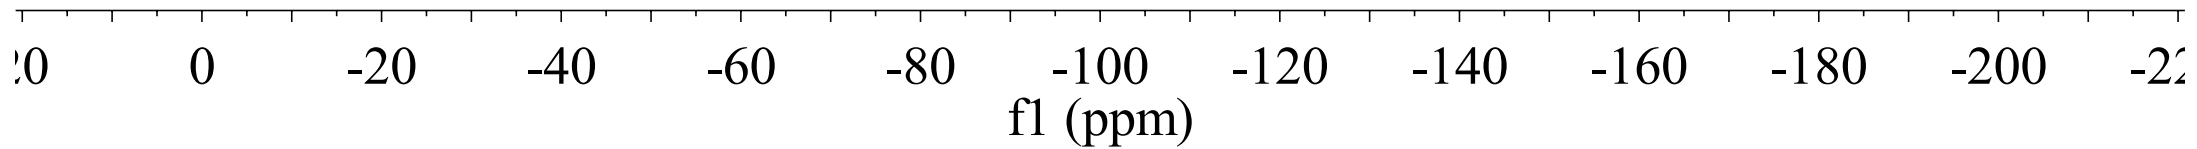

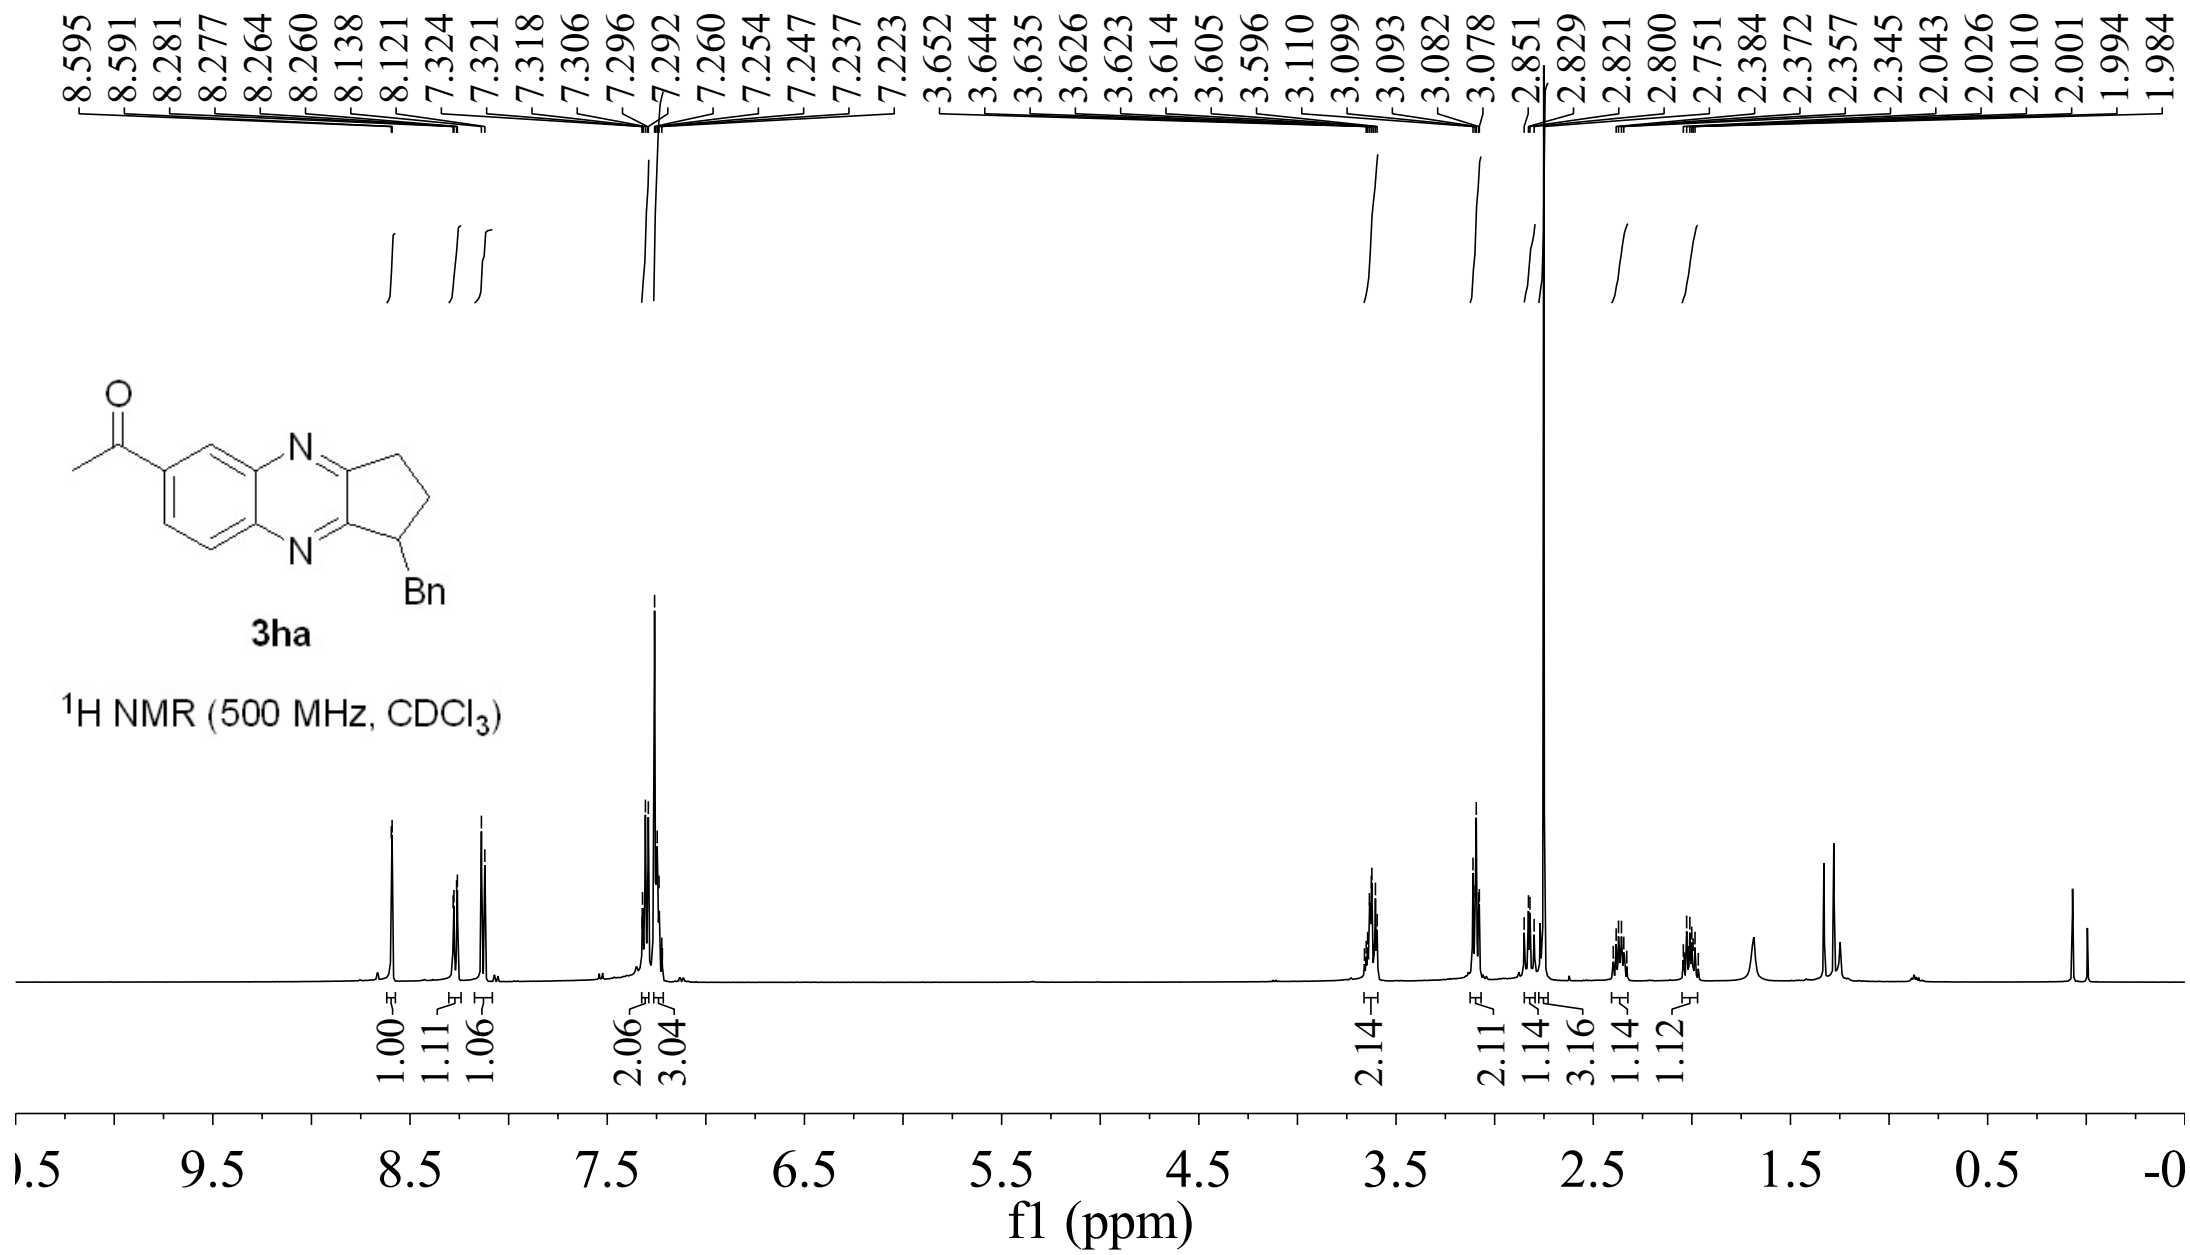



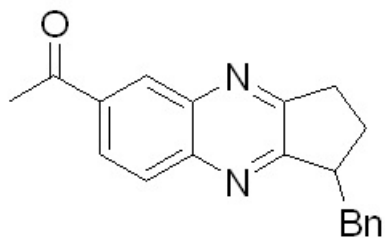

3ha

$^{13}\text{C}$  NMR (126 MHz,  $\text{CDCl}_3$ )

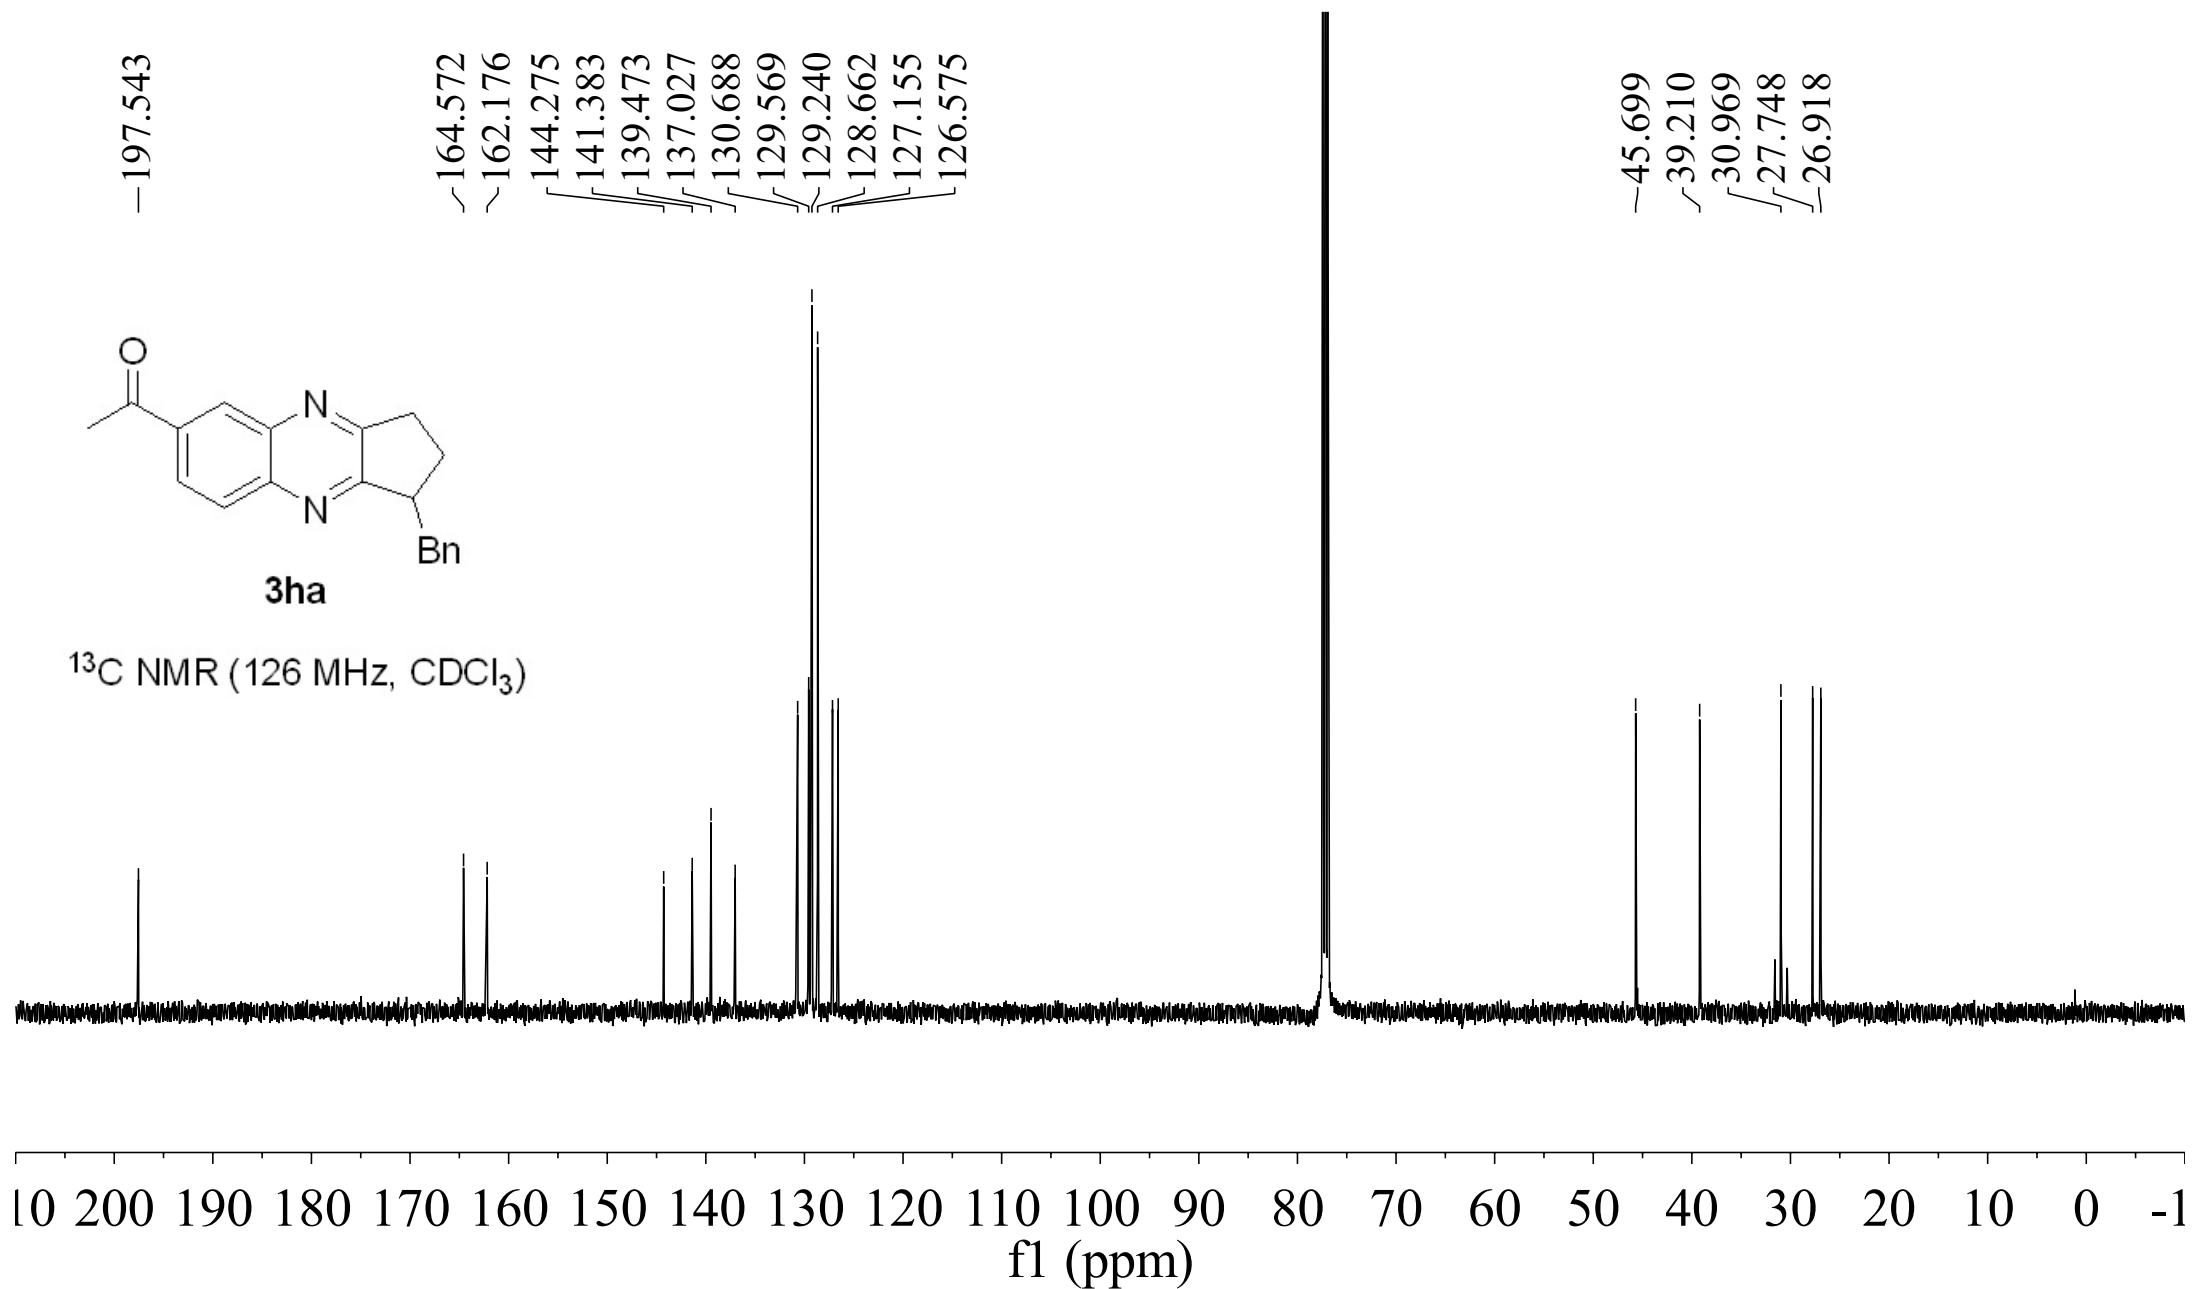

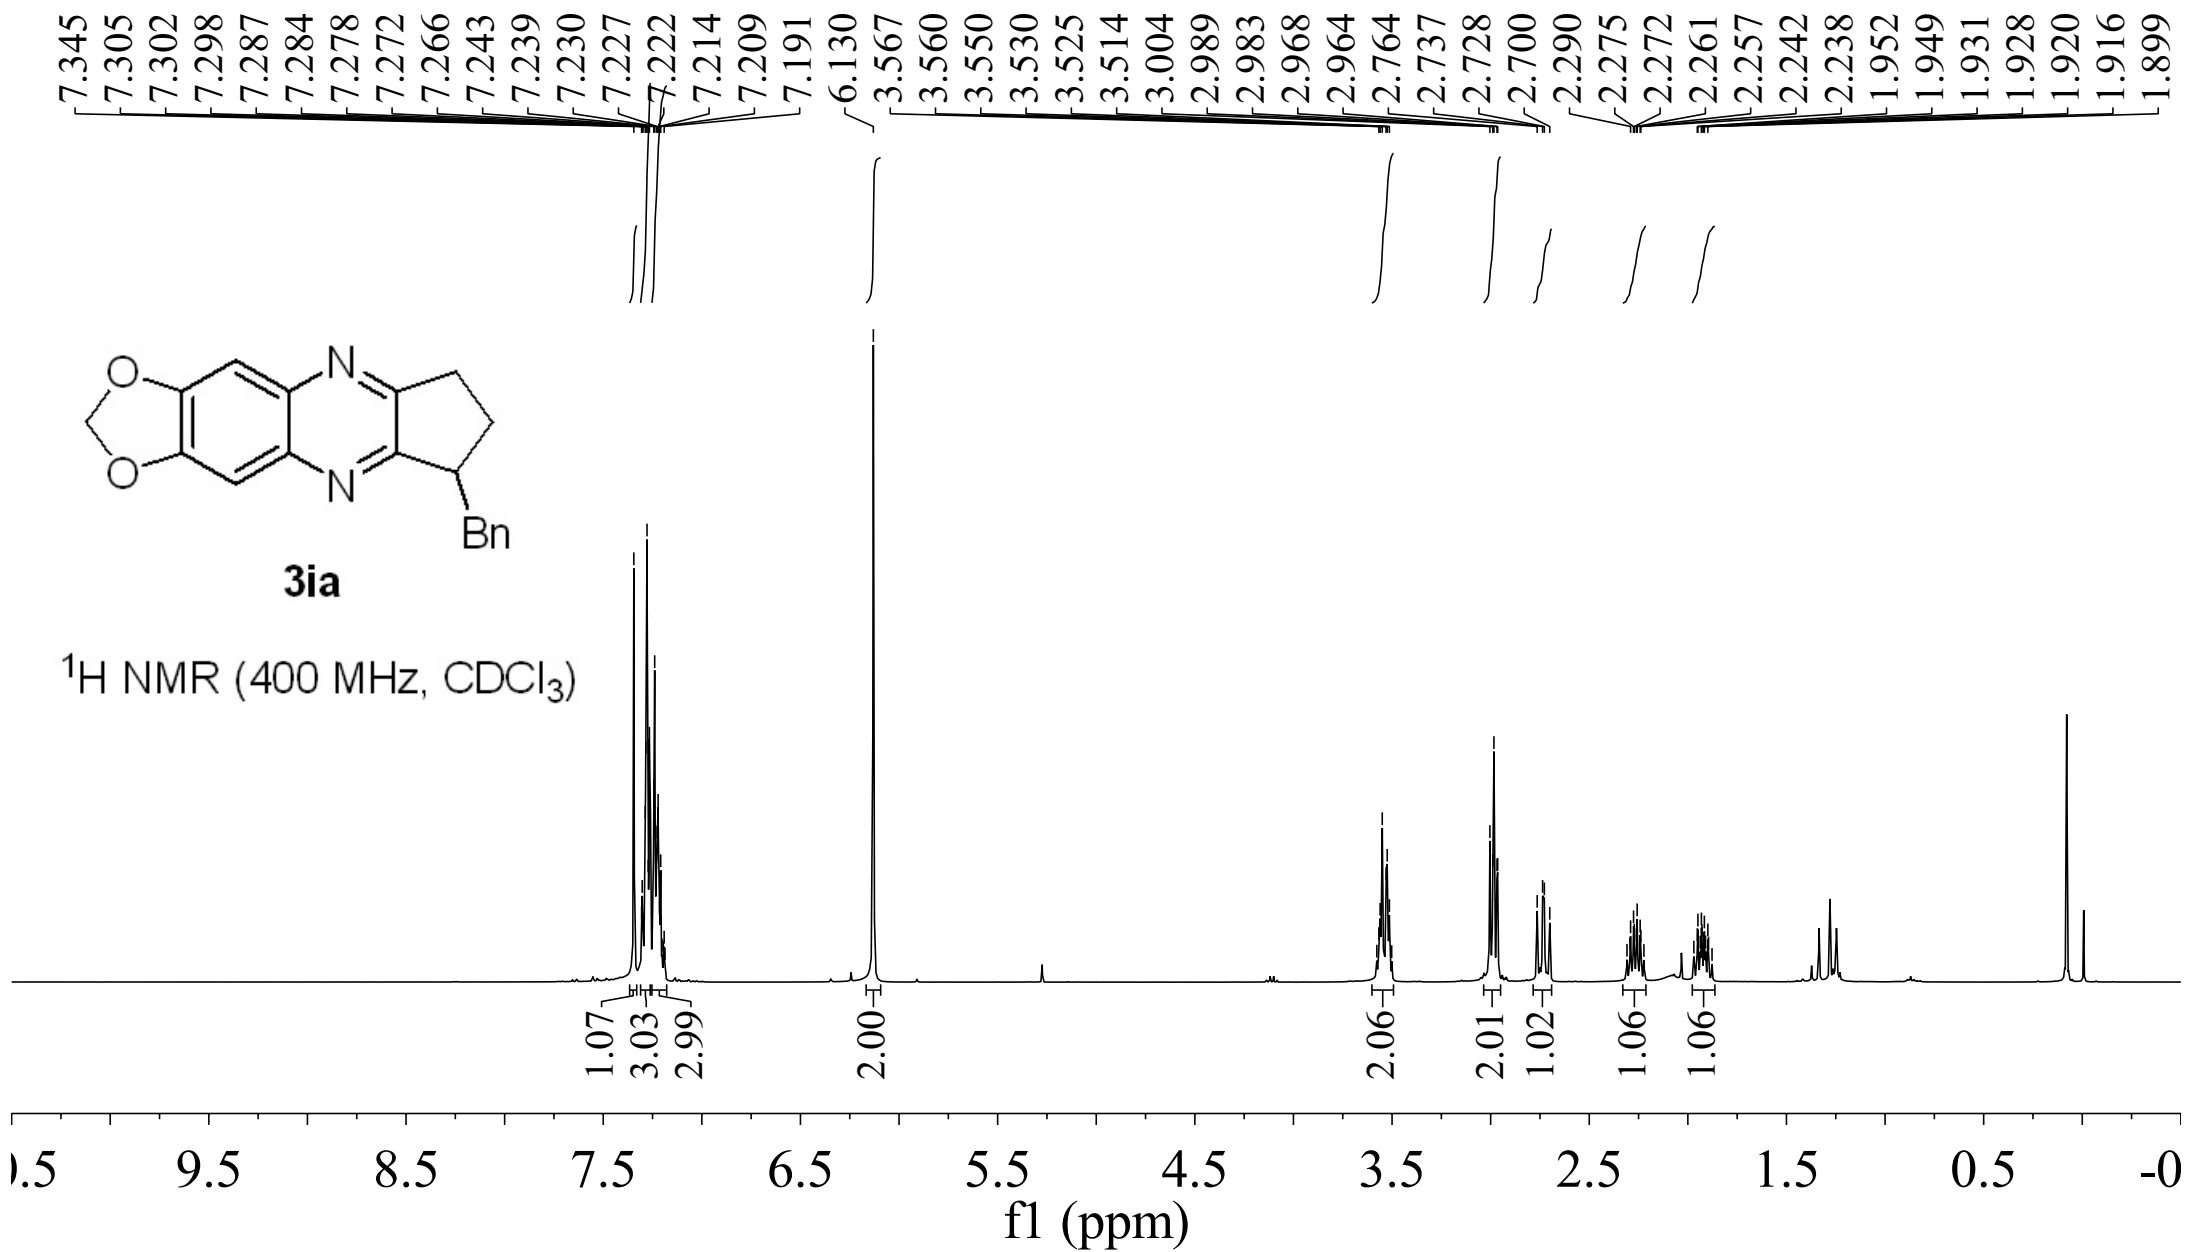

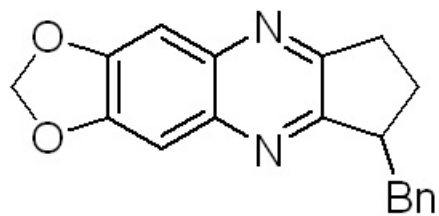

**3ia**

$^{13}\text{C}$  NMR (101 MHz,  $\text{CDCl}_3$ )

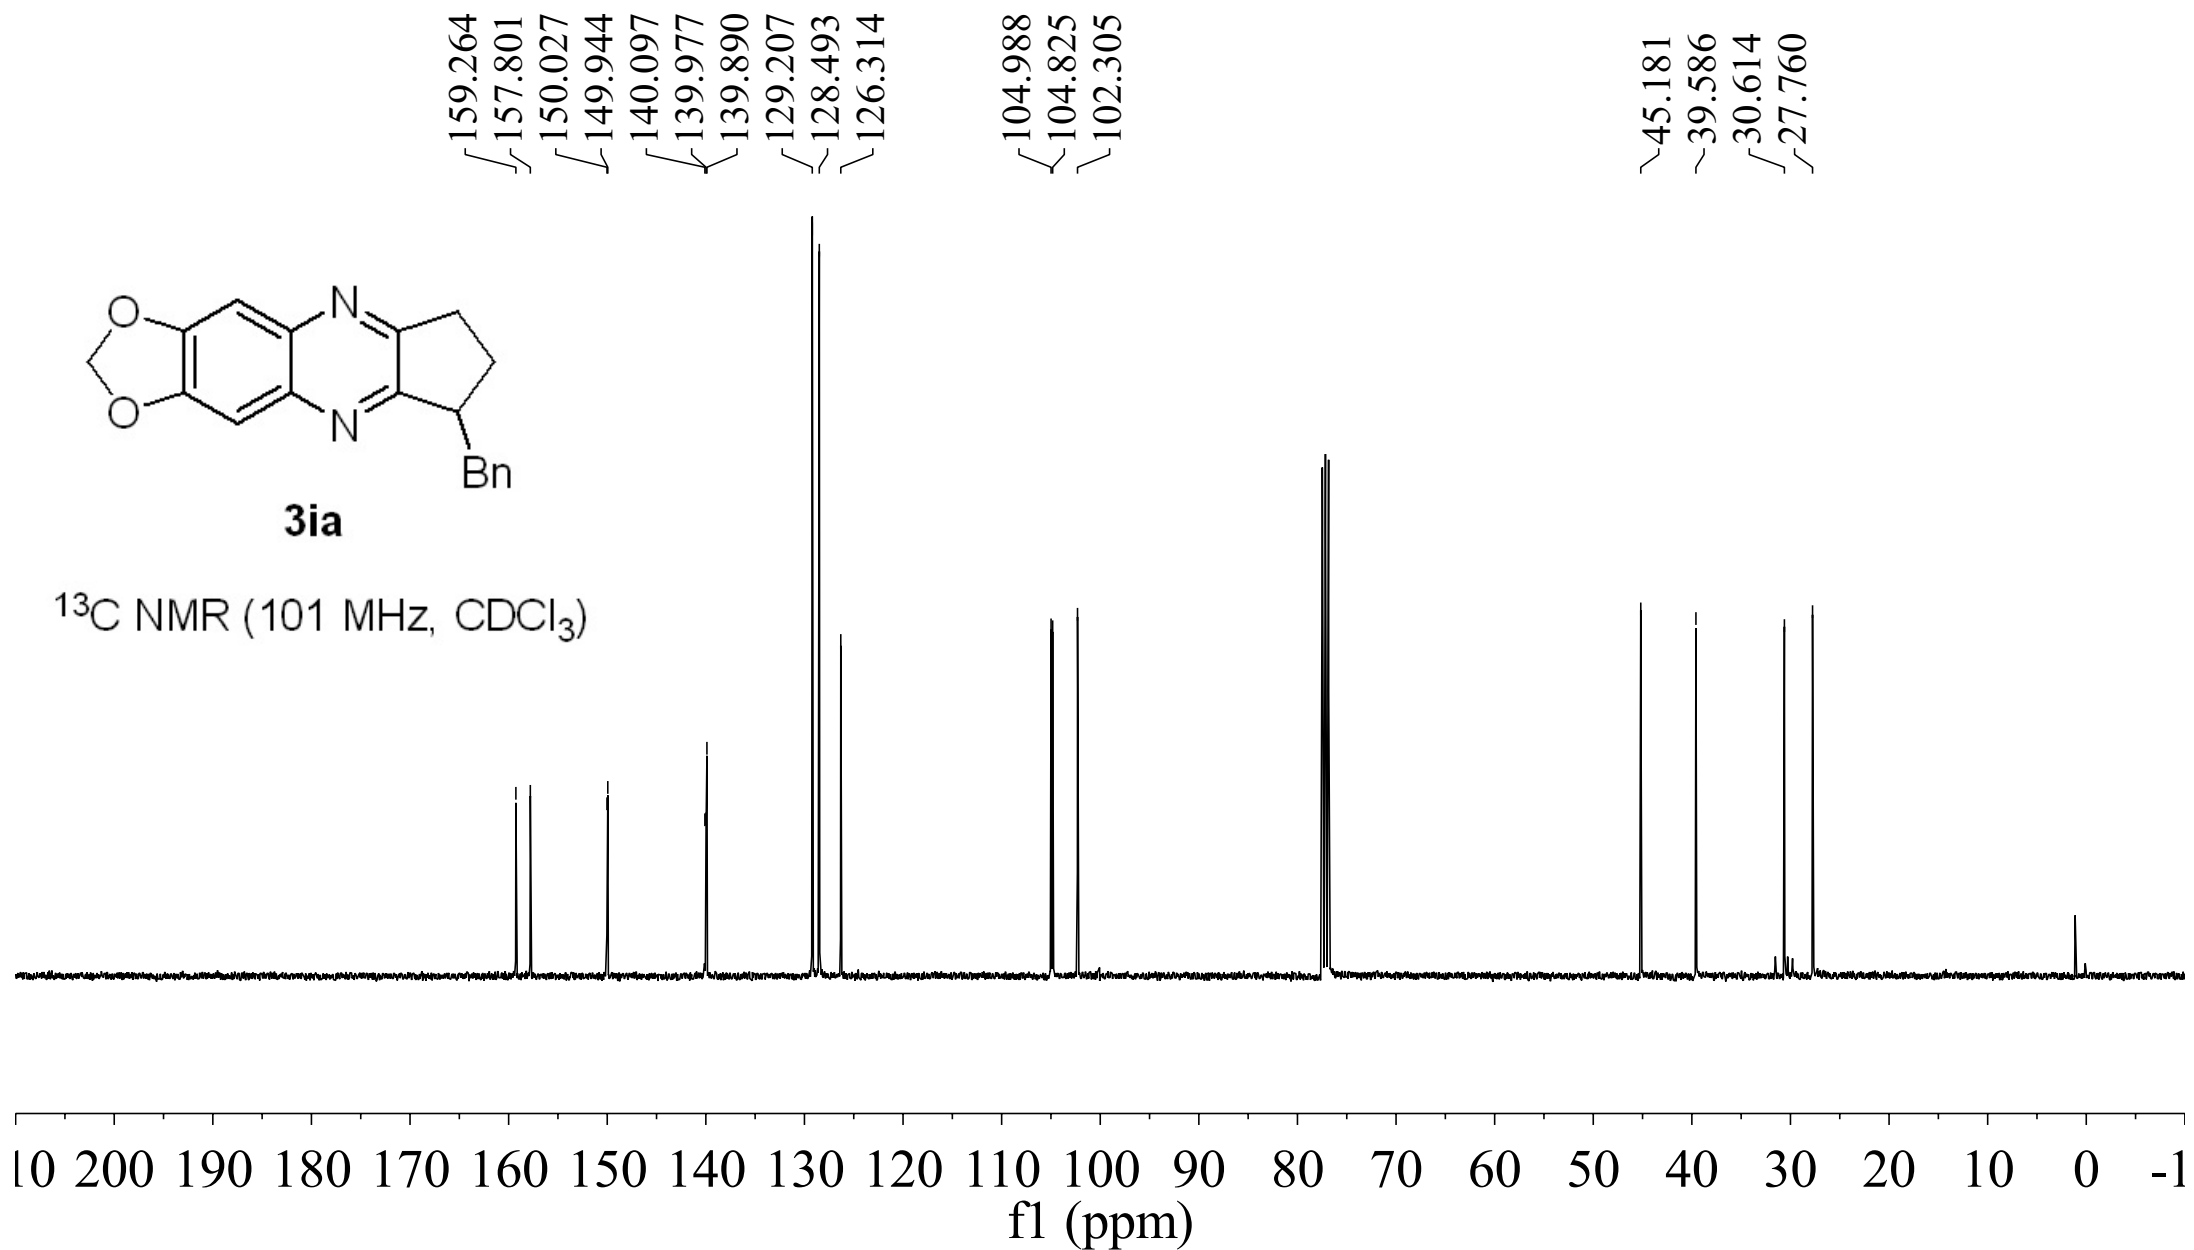

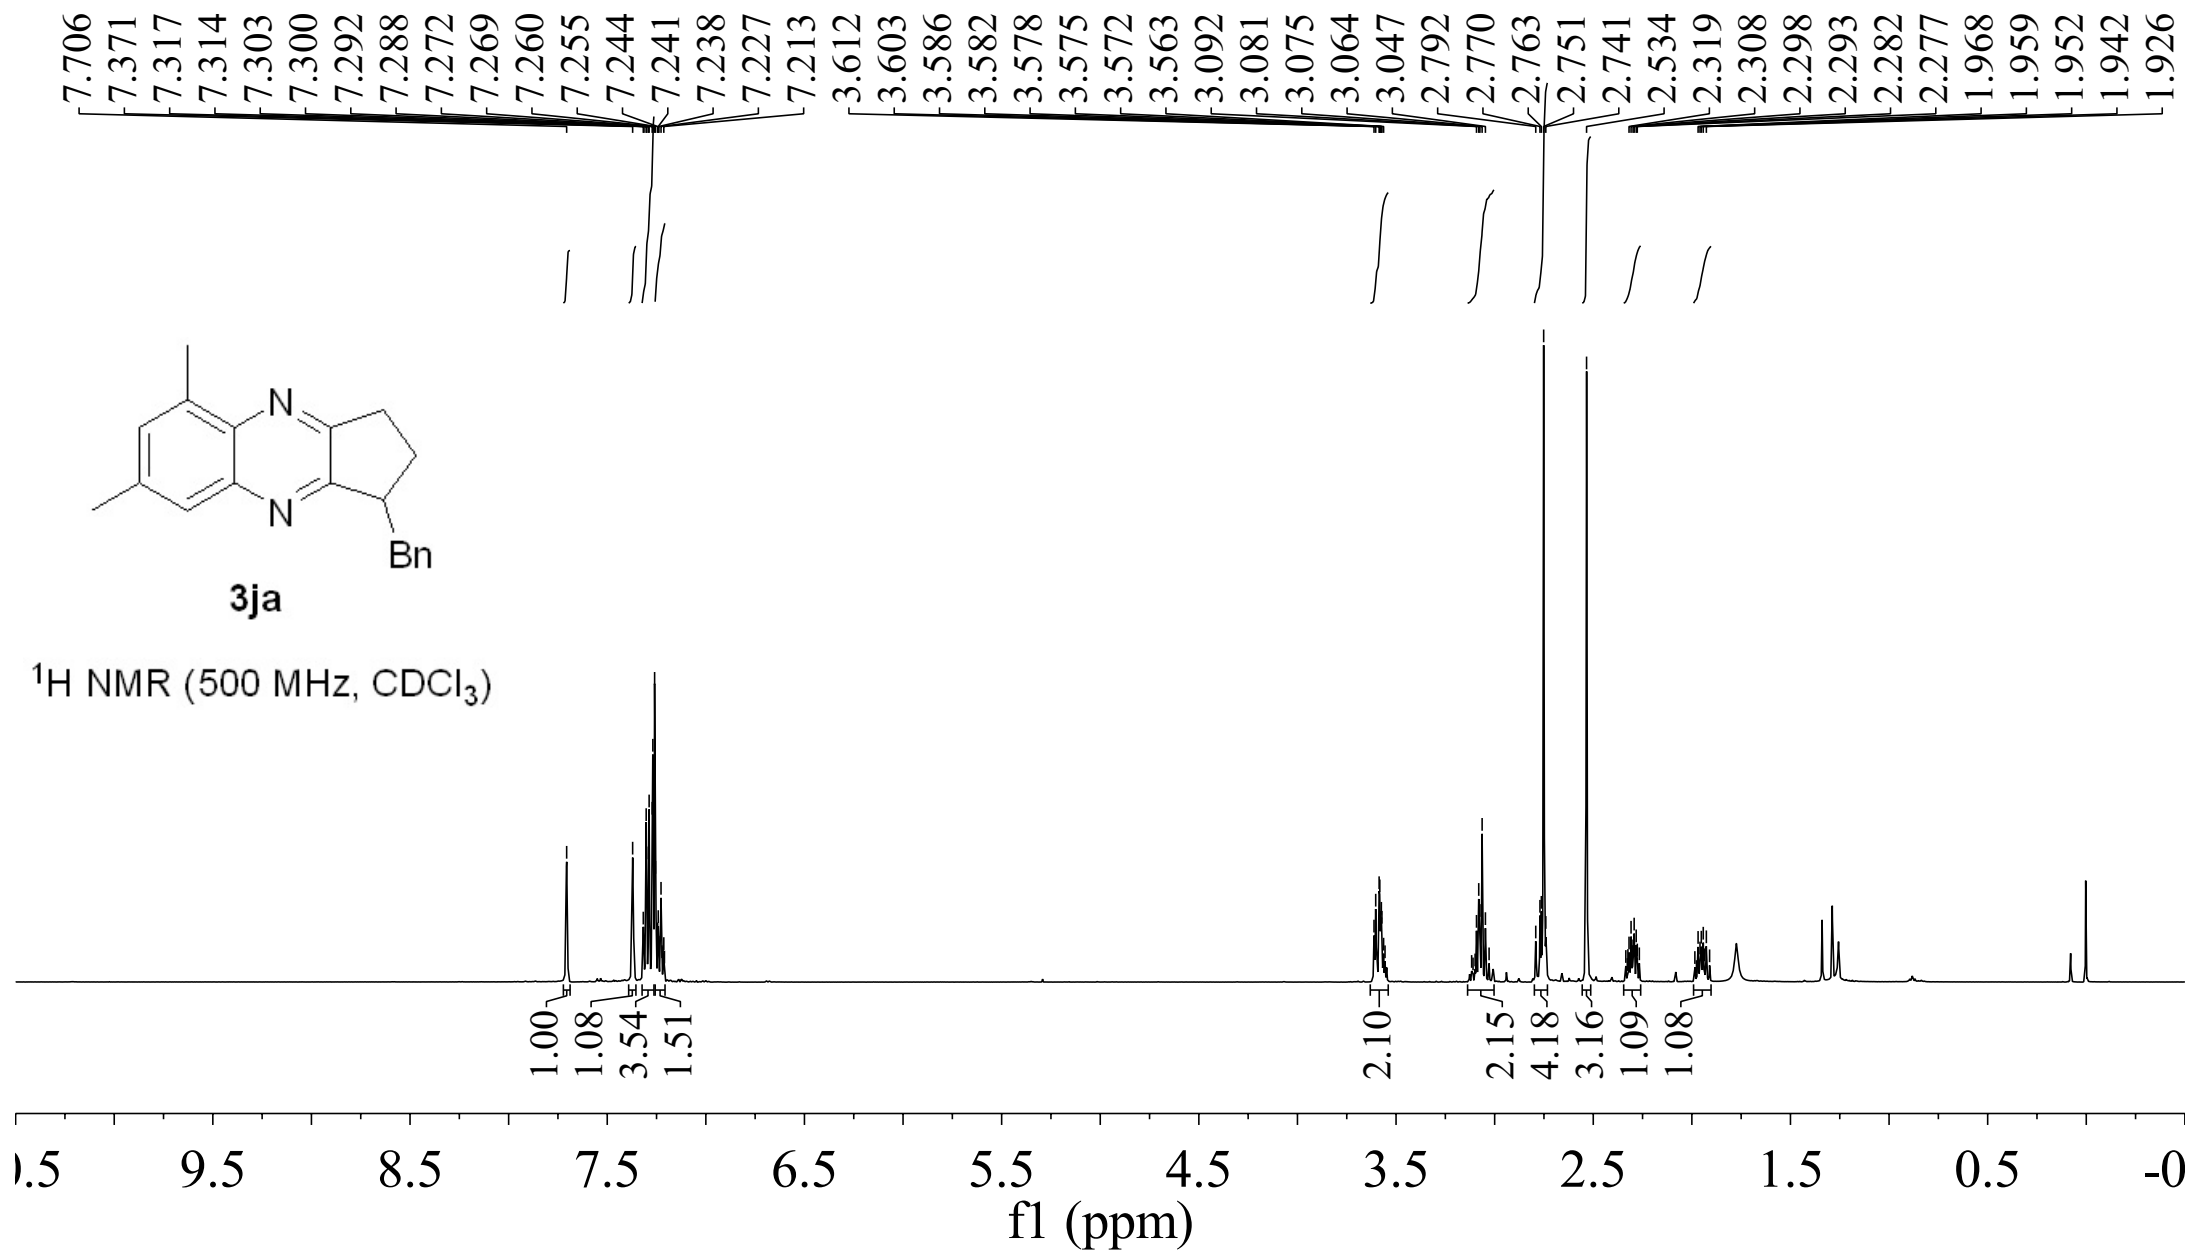

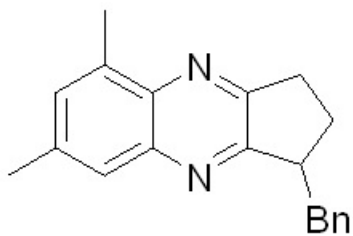

**3ja**

$^{13}\text{C}$  NMR (126 MHz,  $\text{CDCl}_3$ )

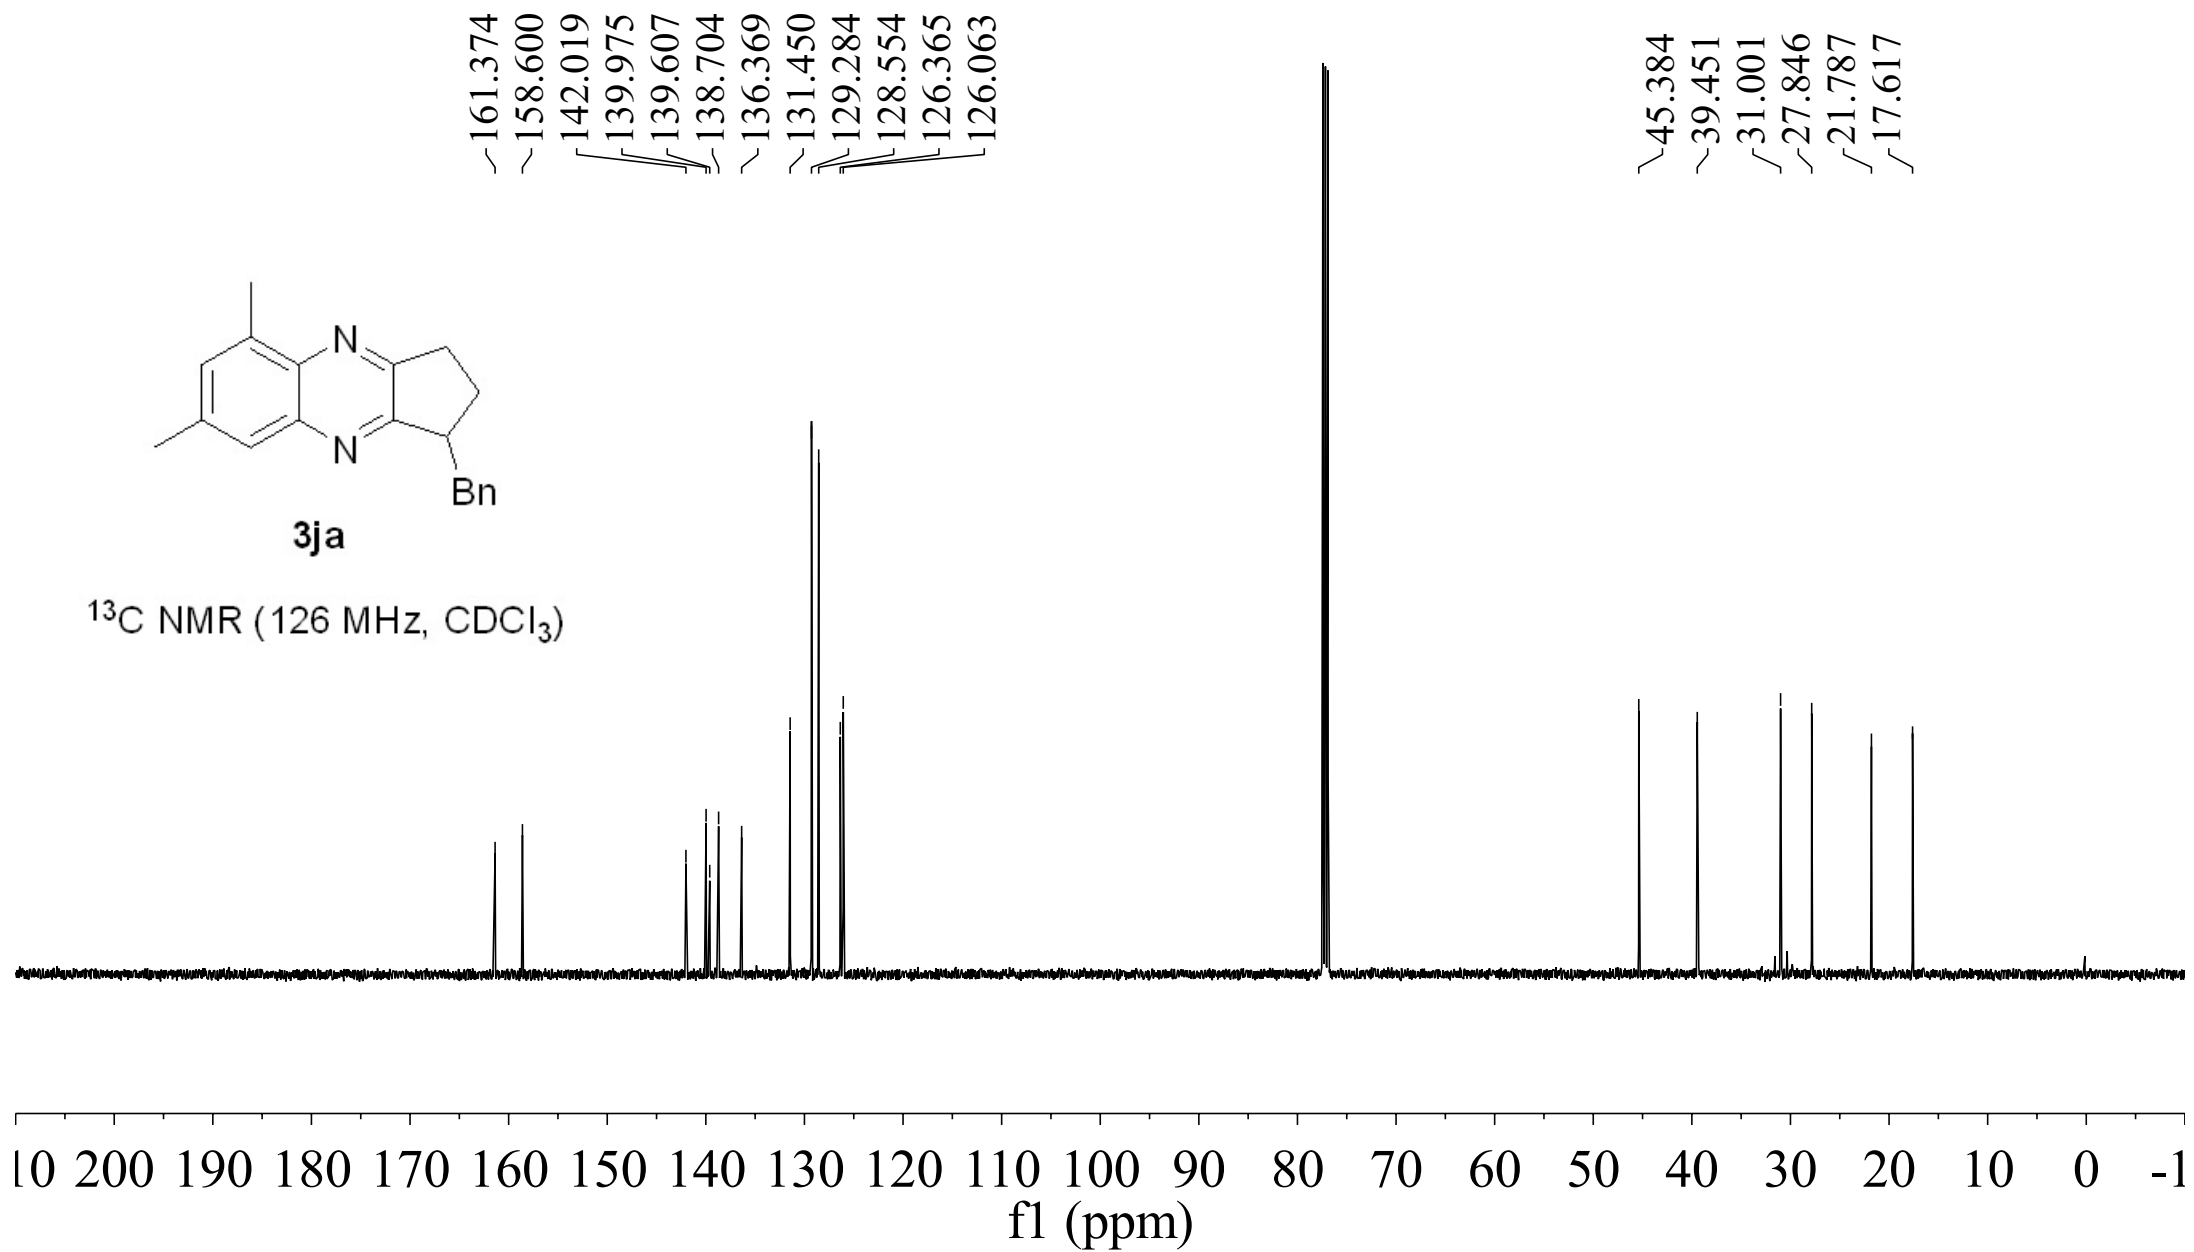

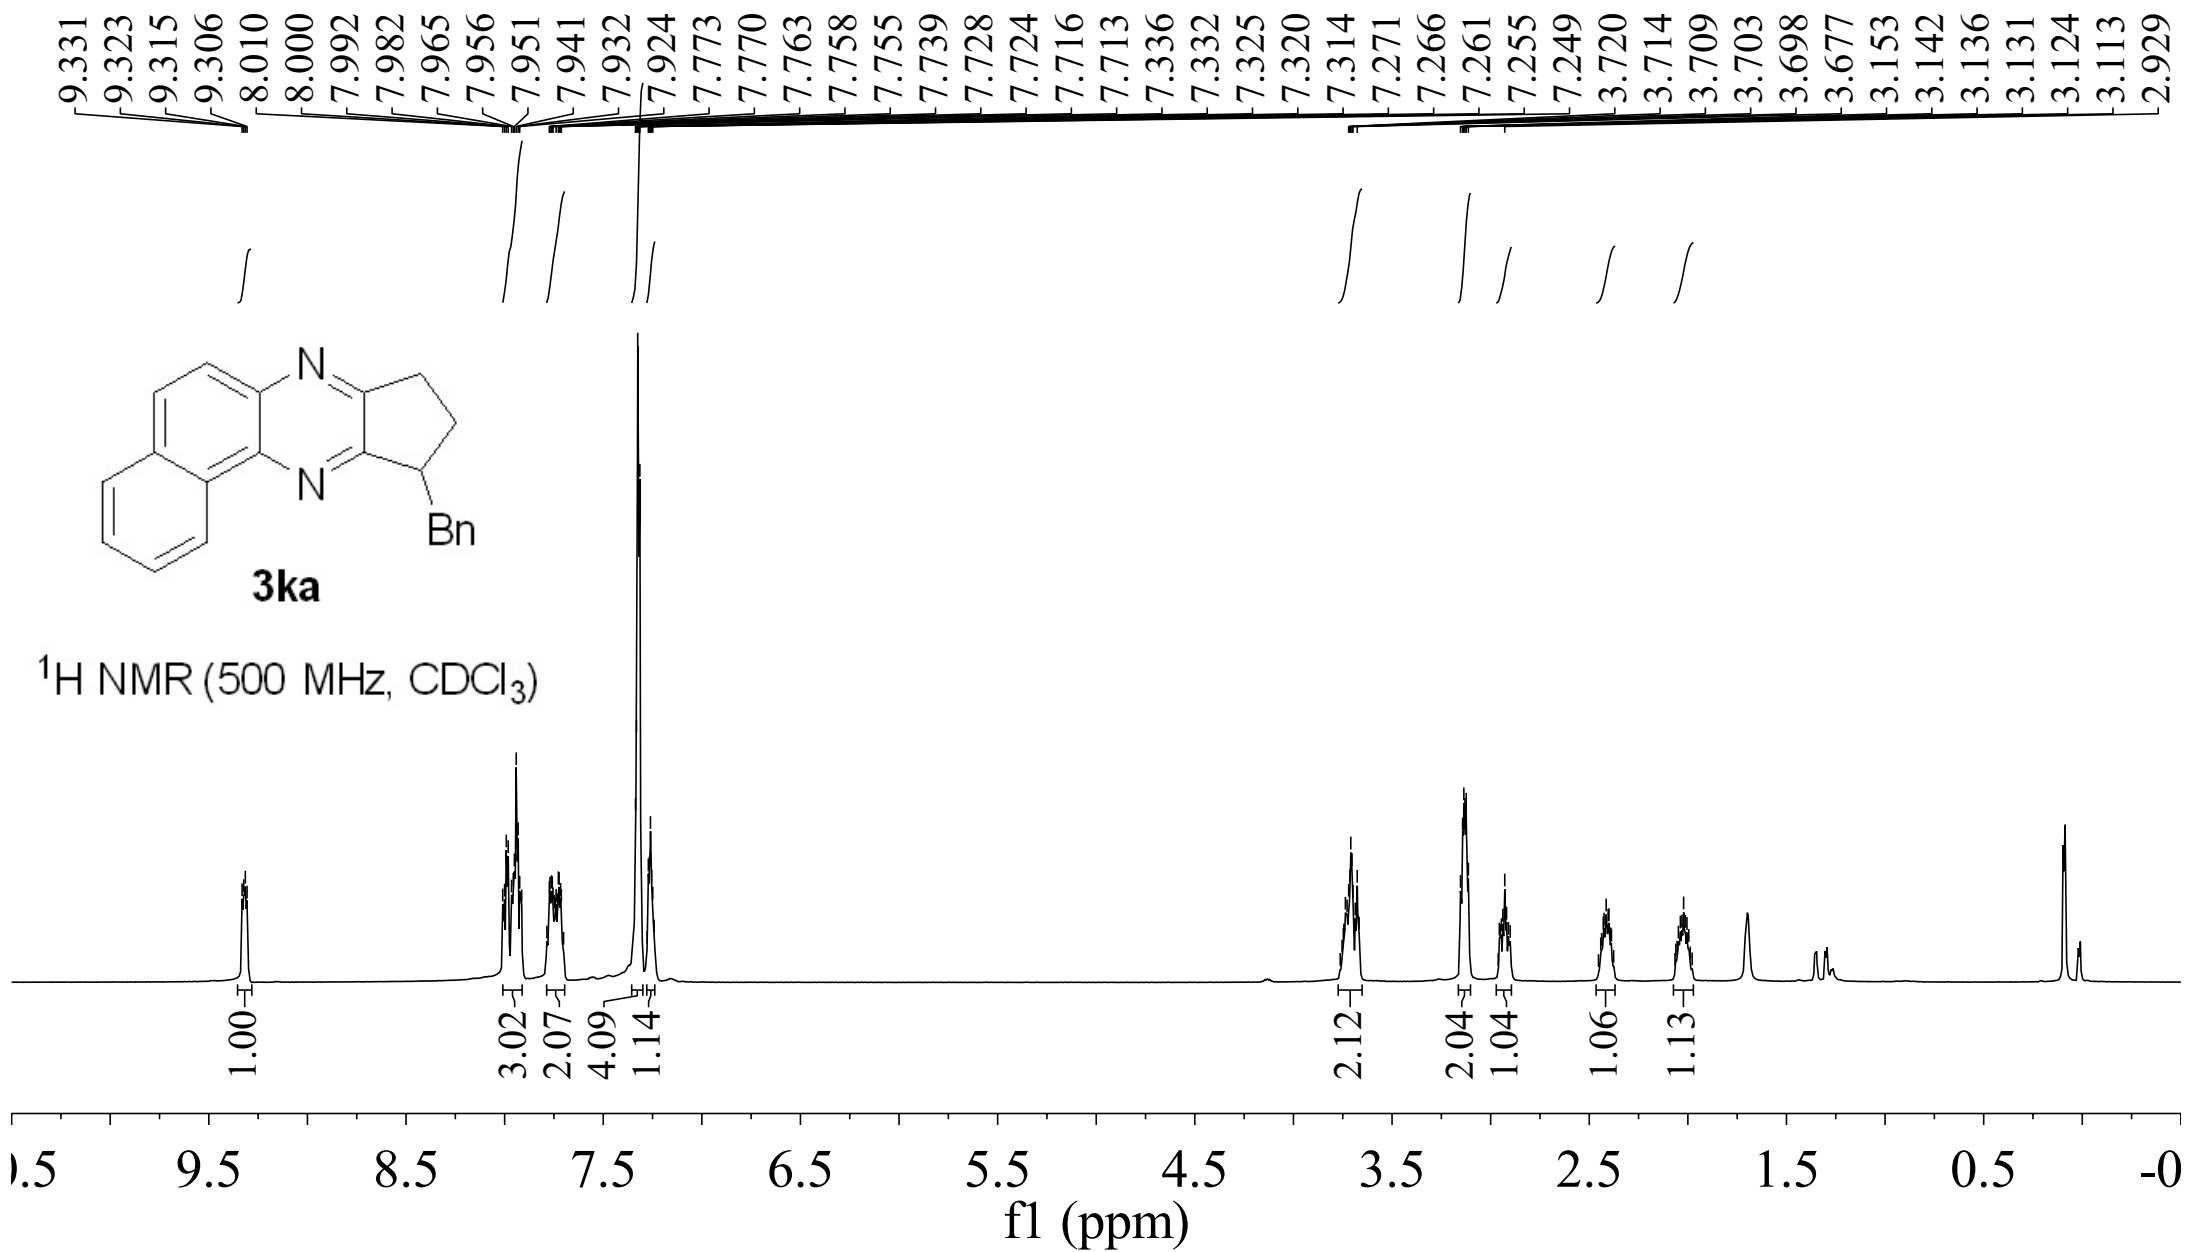

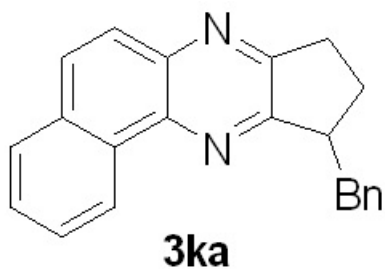

$^{13}\text{C}$  NMR (126 MHz,  $\text{CDCl}_3$ )

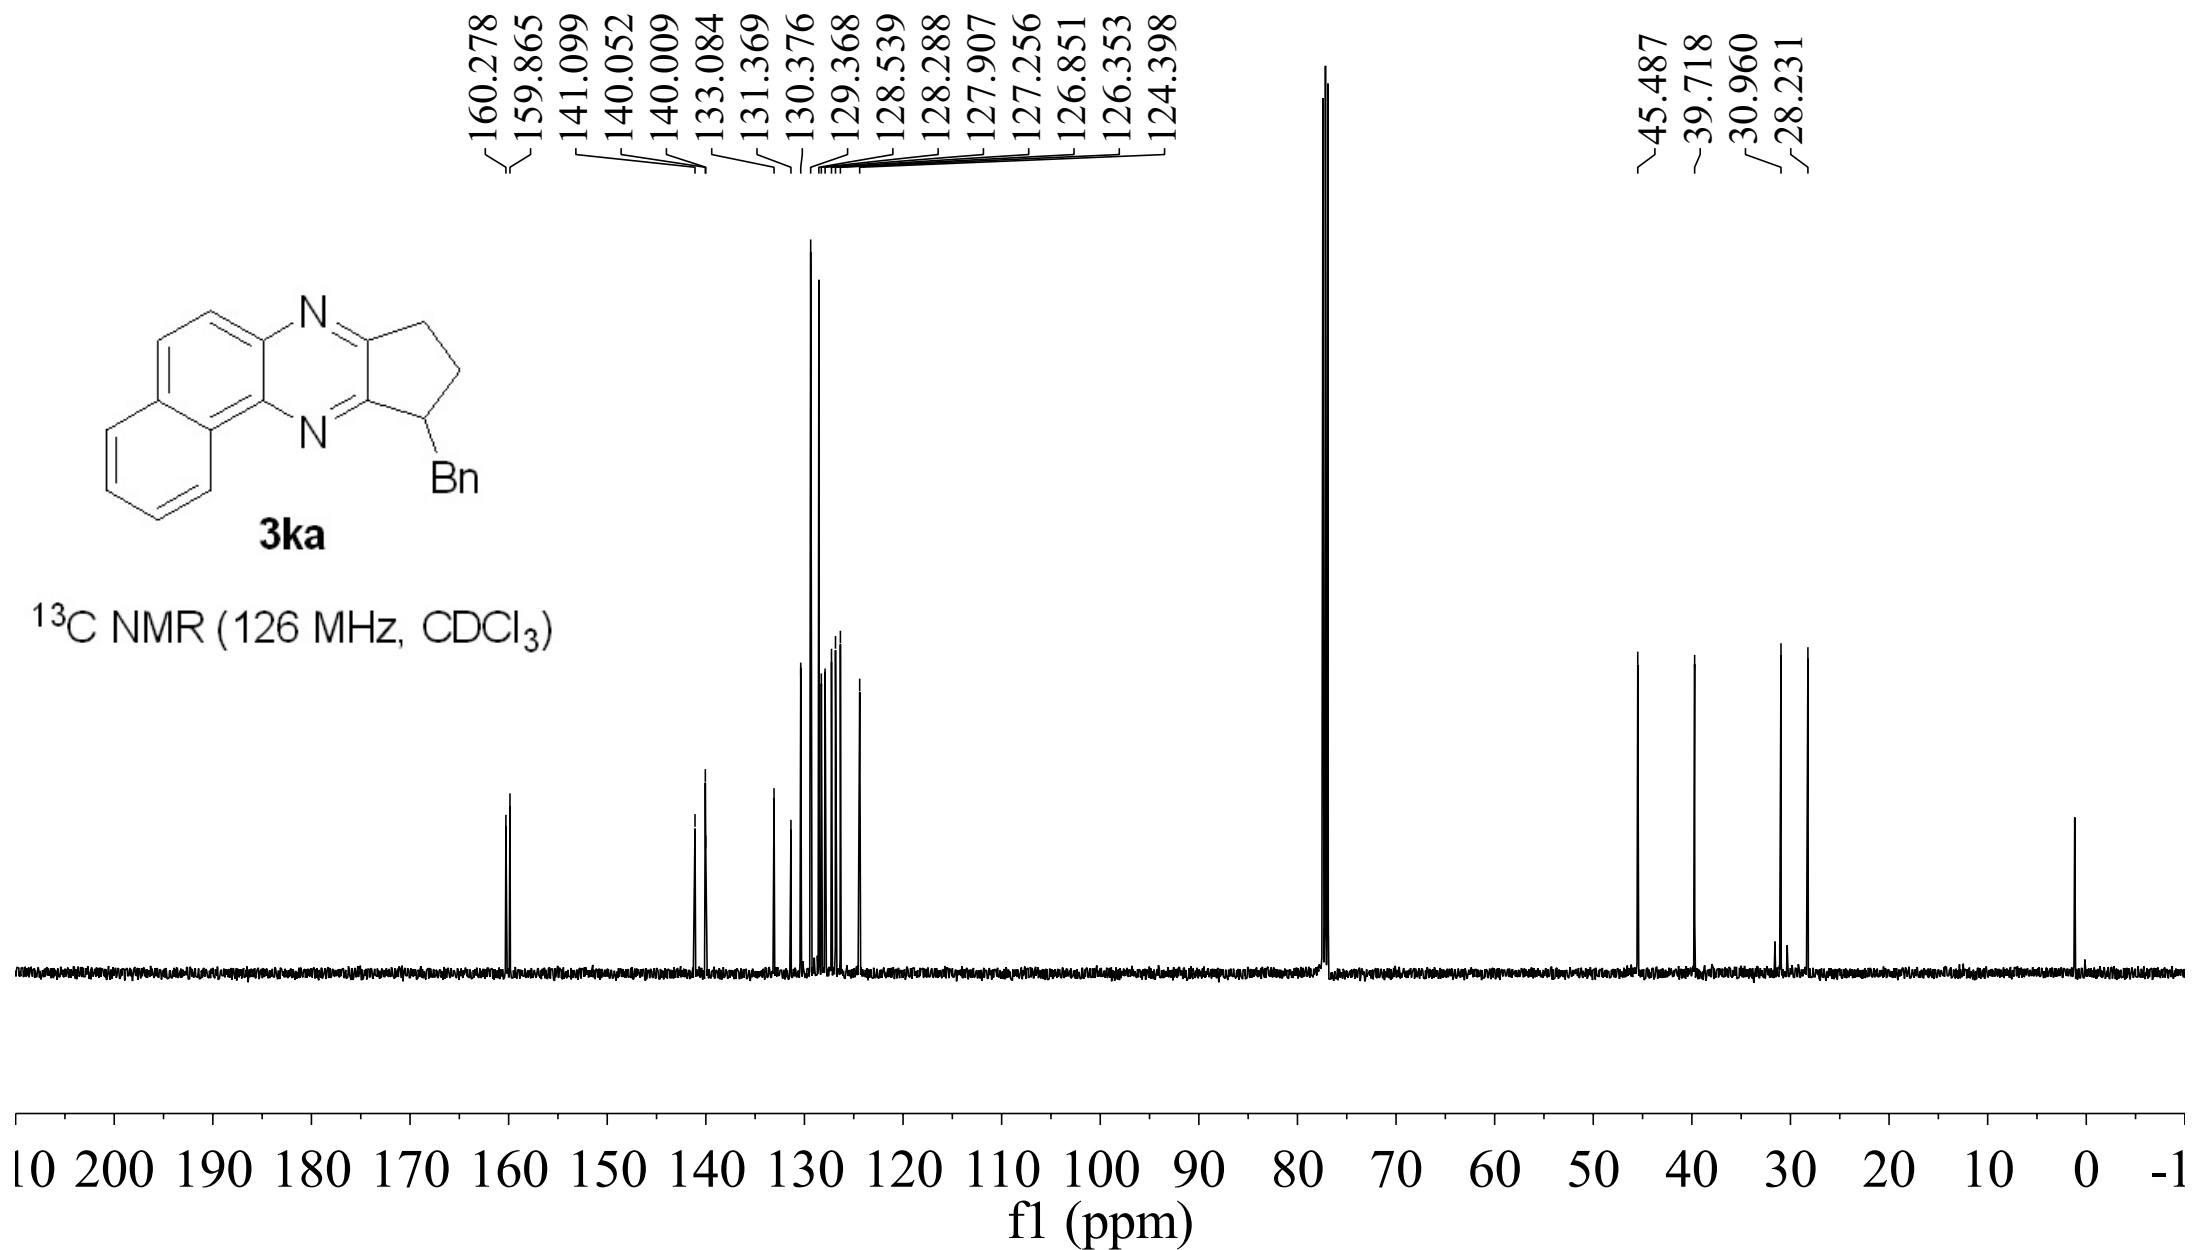

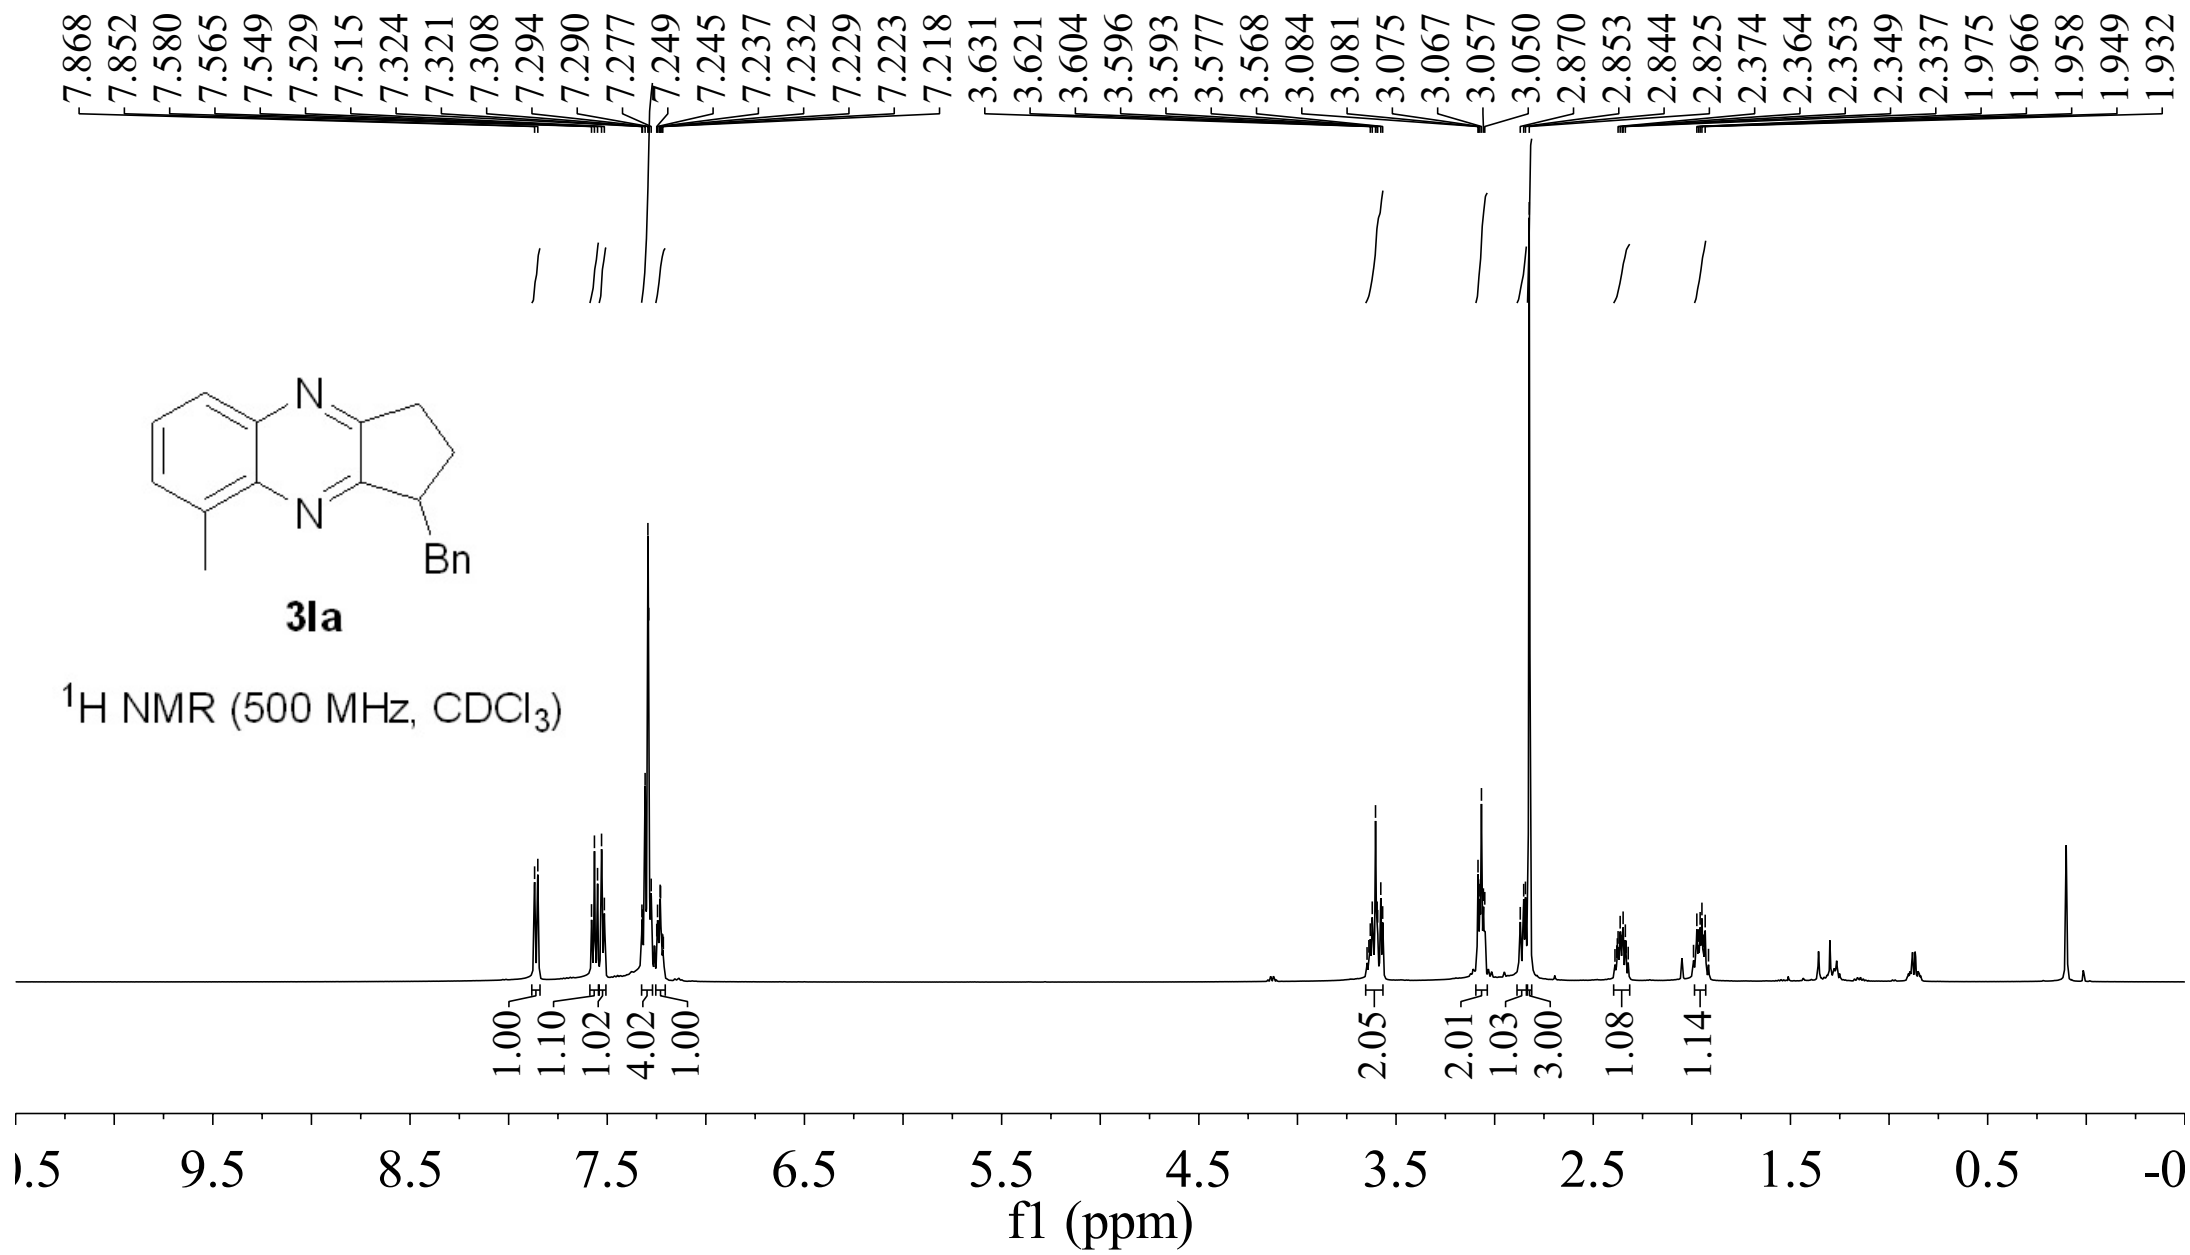



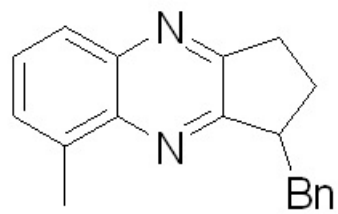

**3la**

$^{13}\text{C}$  NMR (126 MHz,  $\text{CDCl}_3$ )

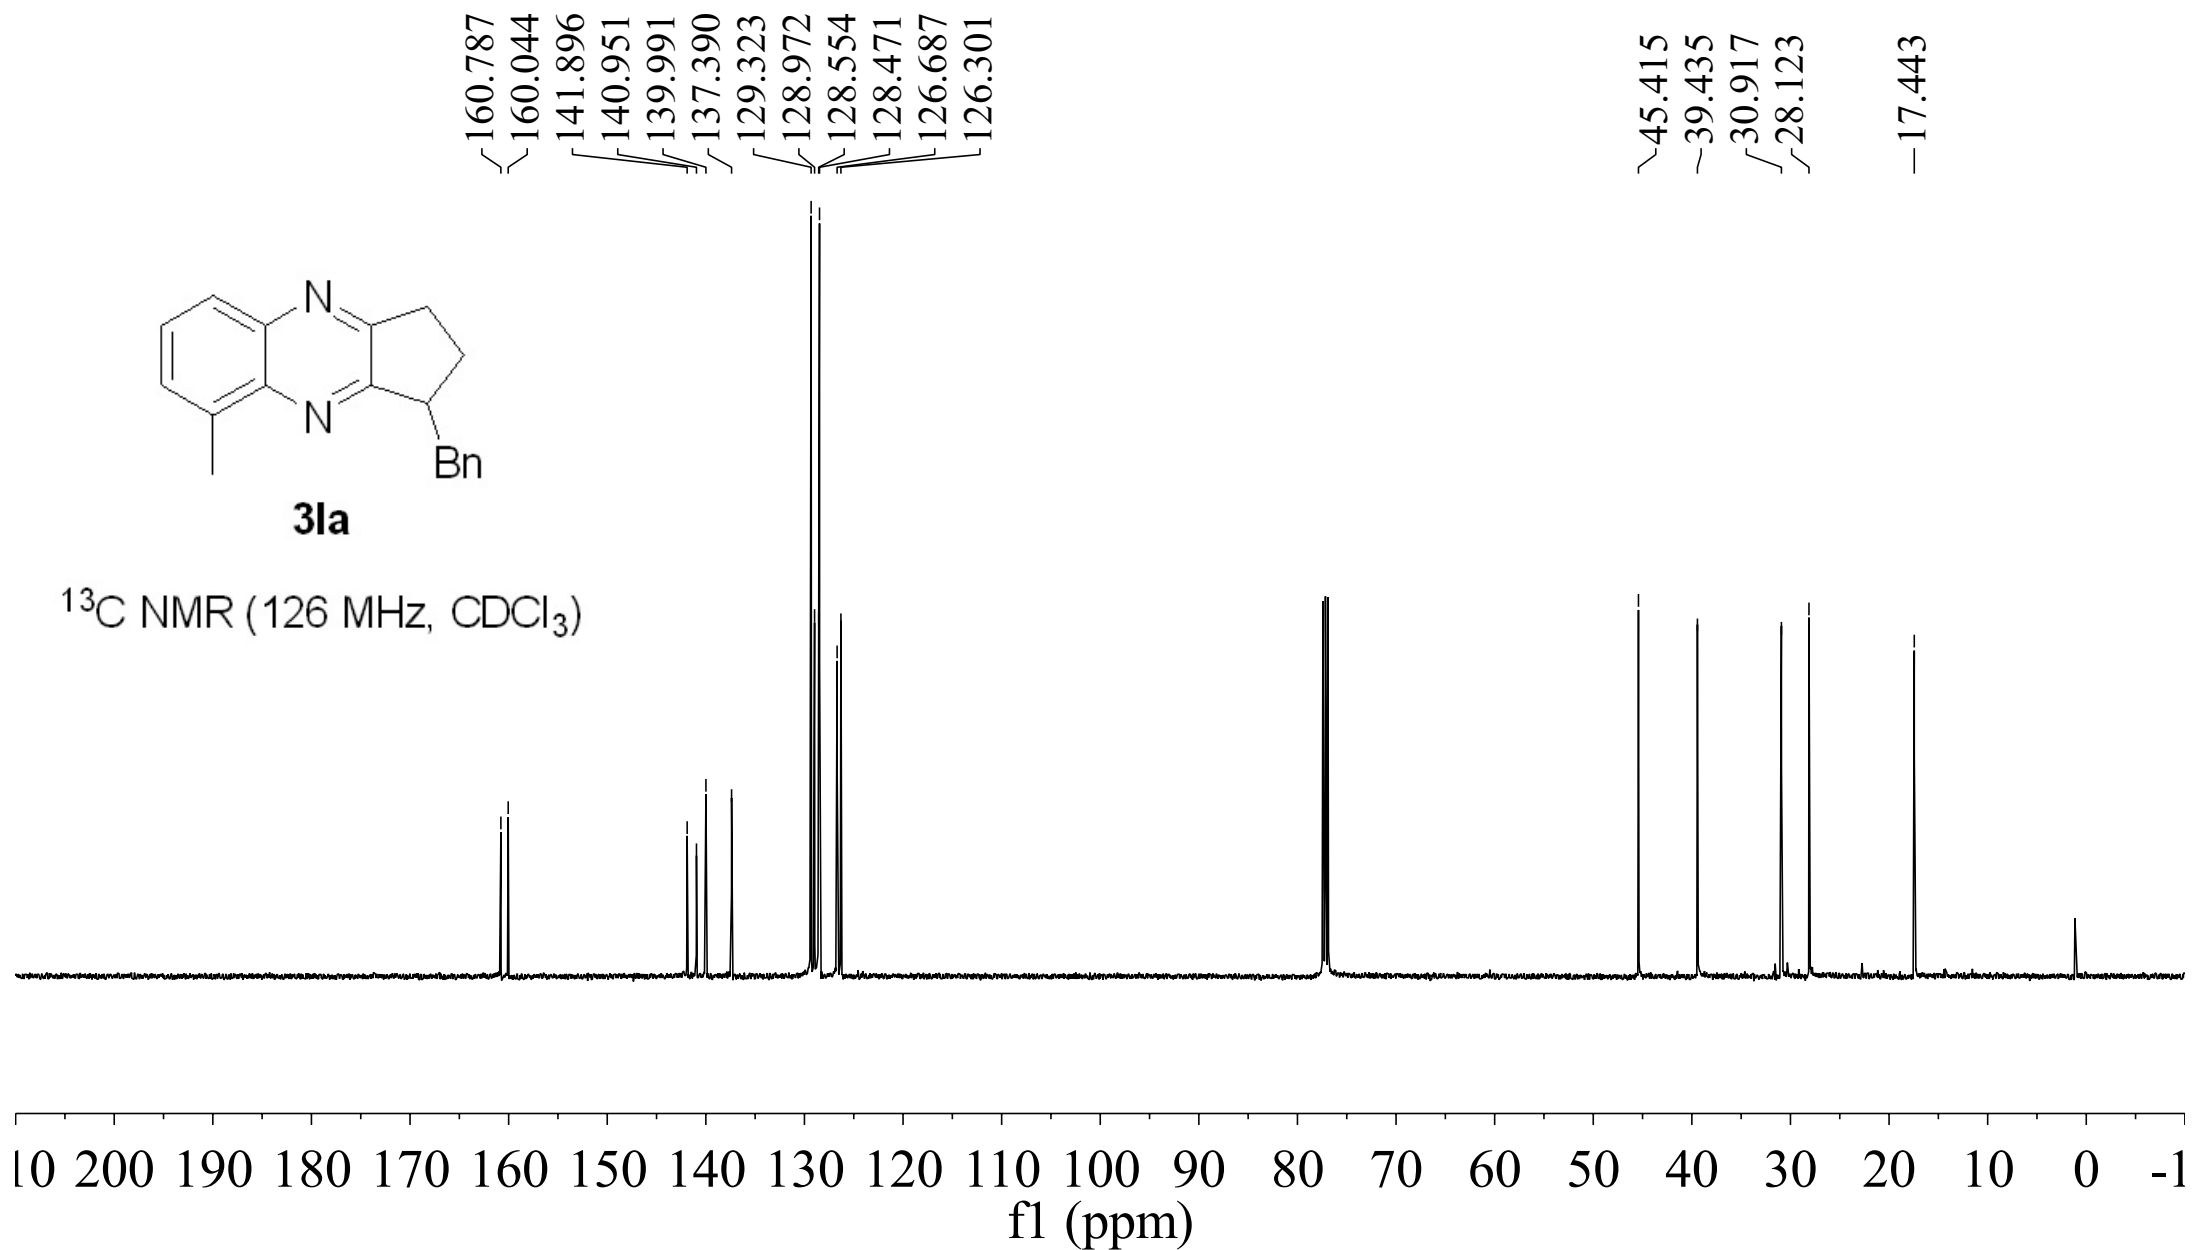

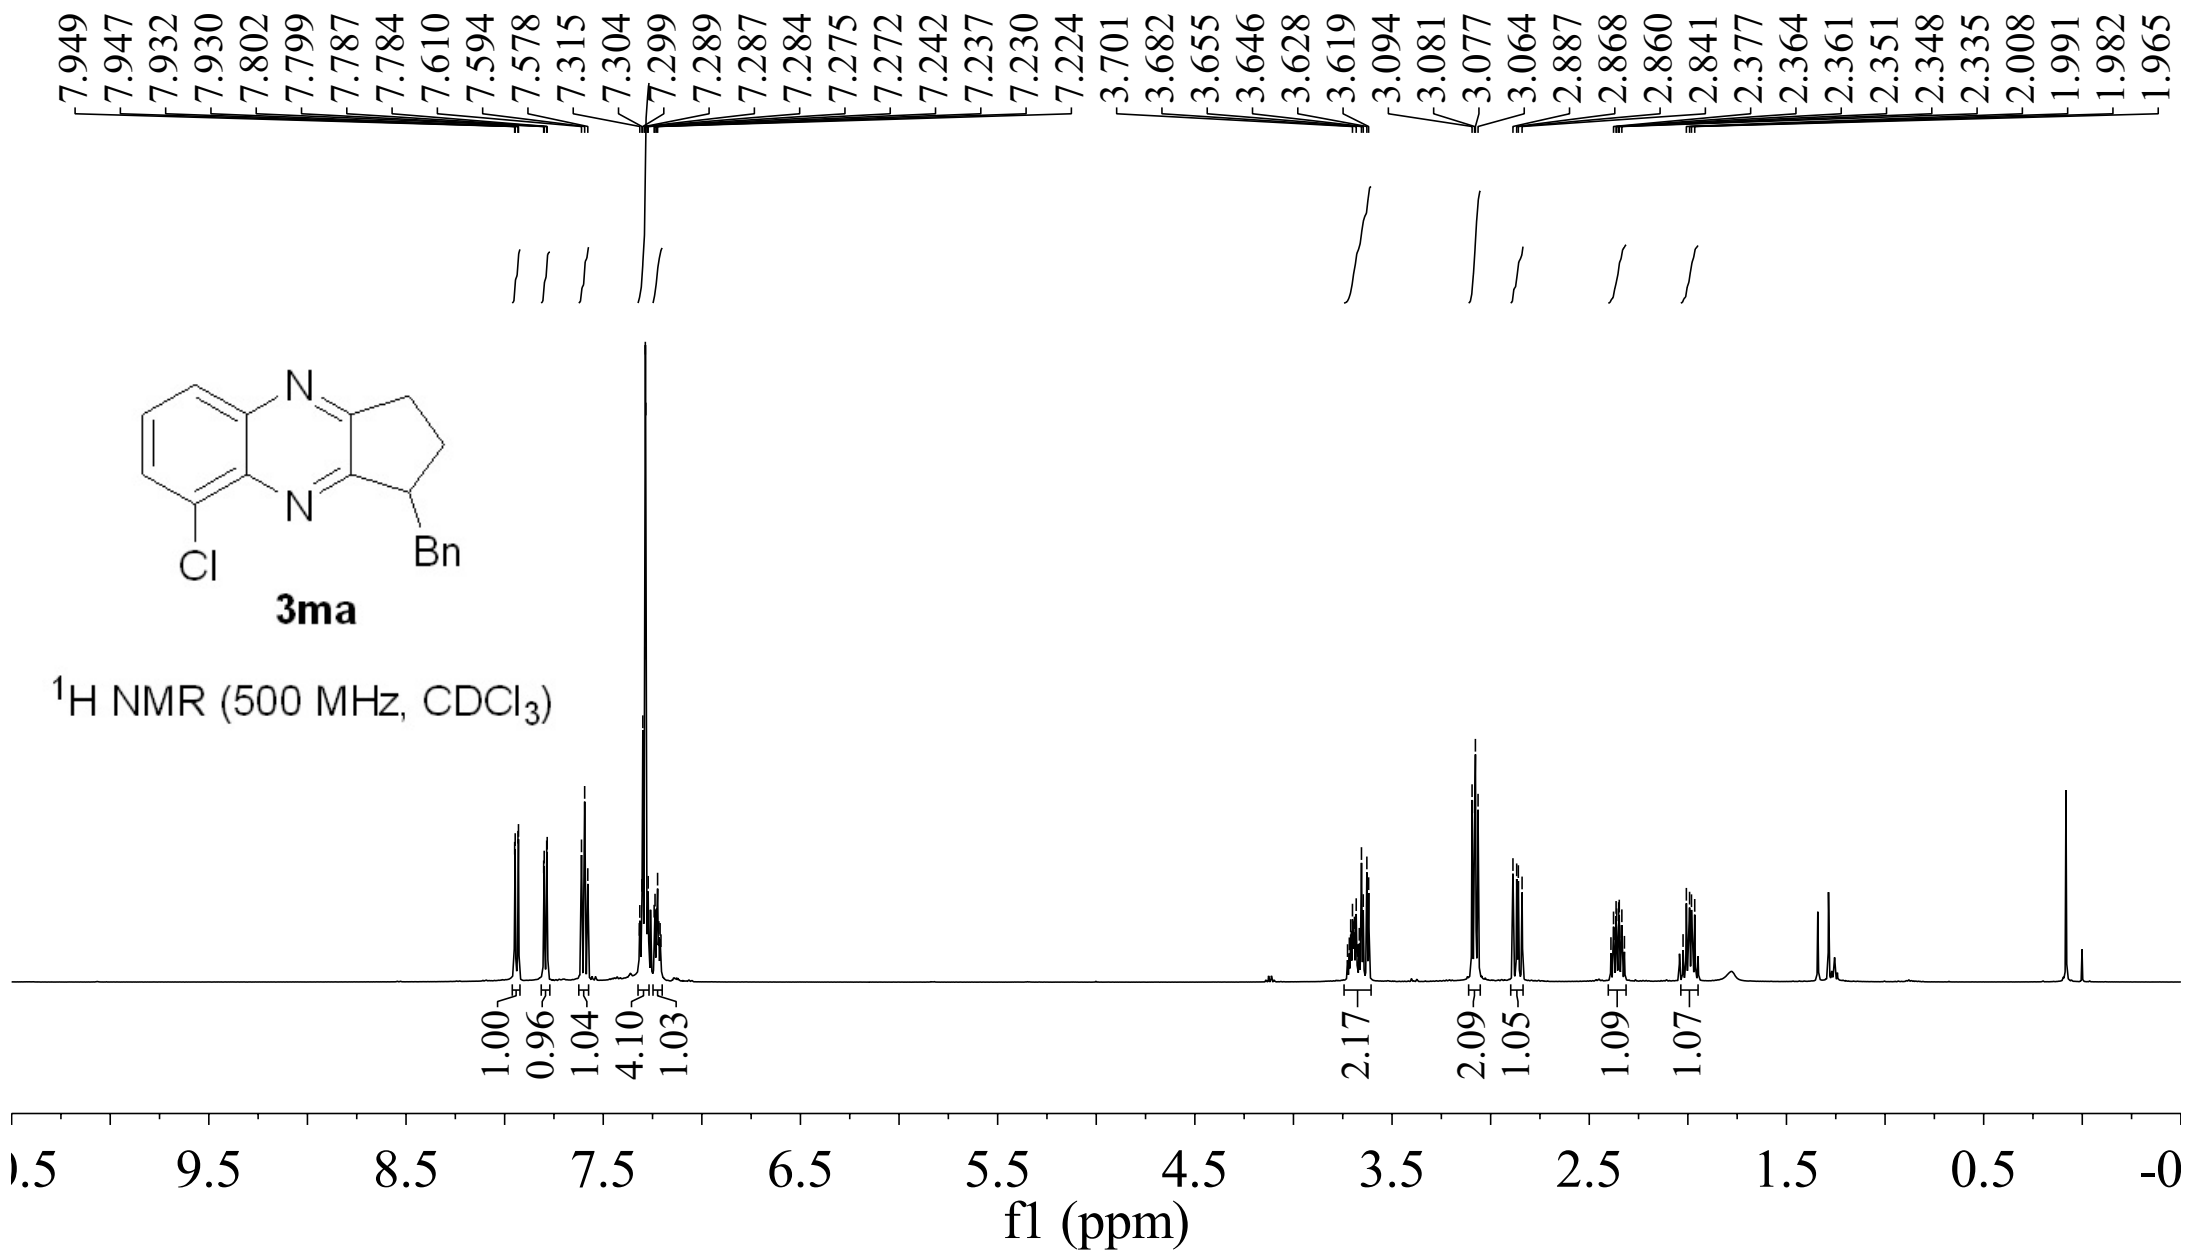

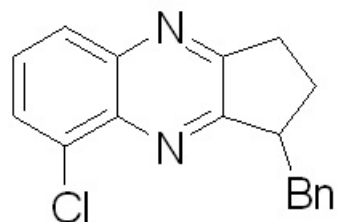

**3ma**

$^{13}\text{C}$  NMR (126 MHz,  $\text{CDCl}_3$ )

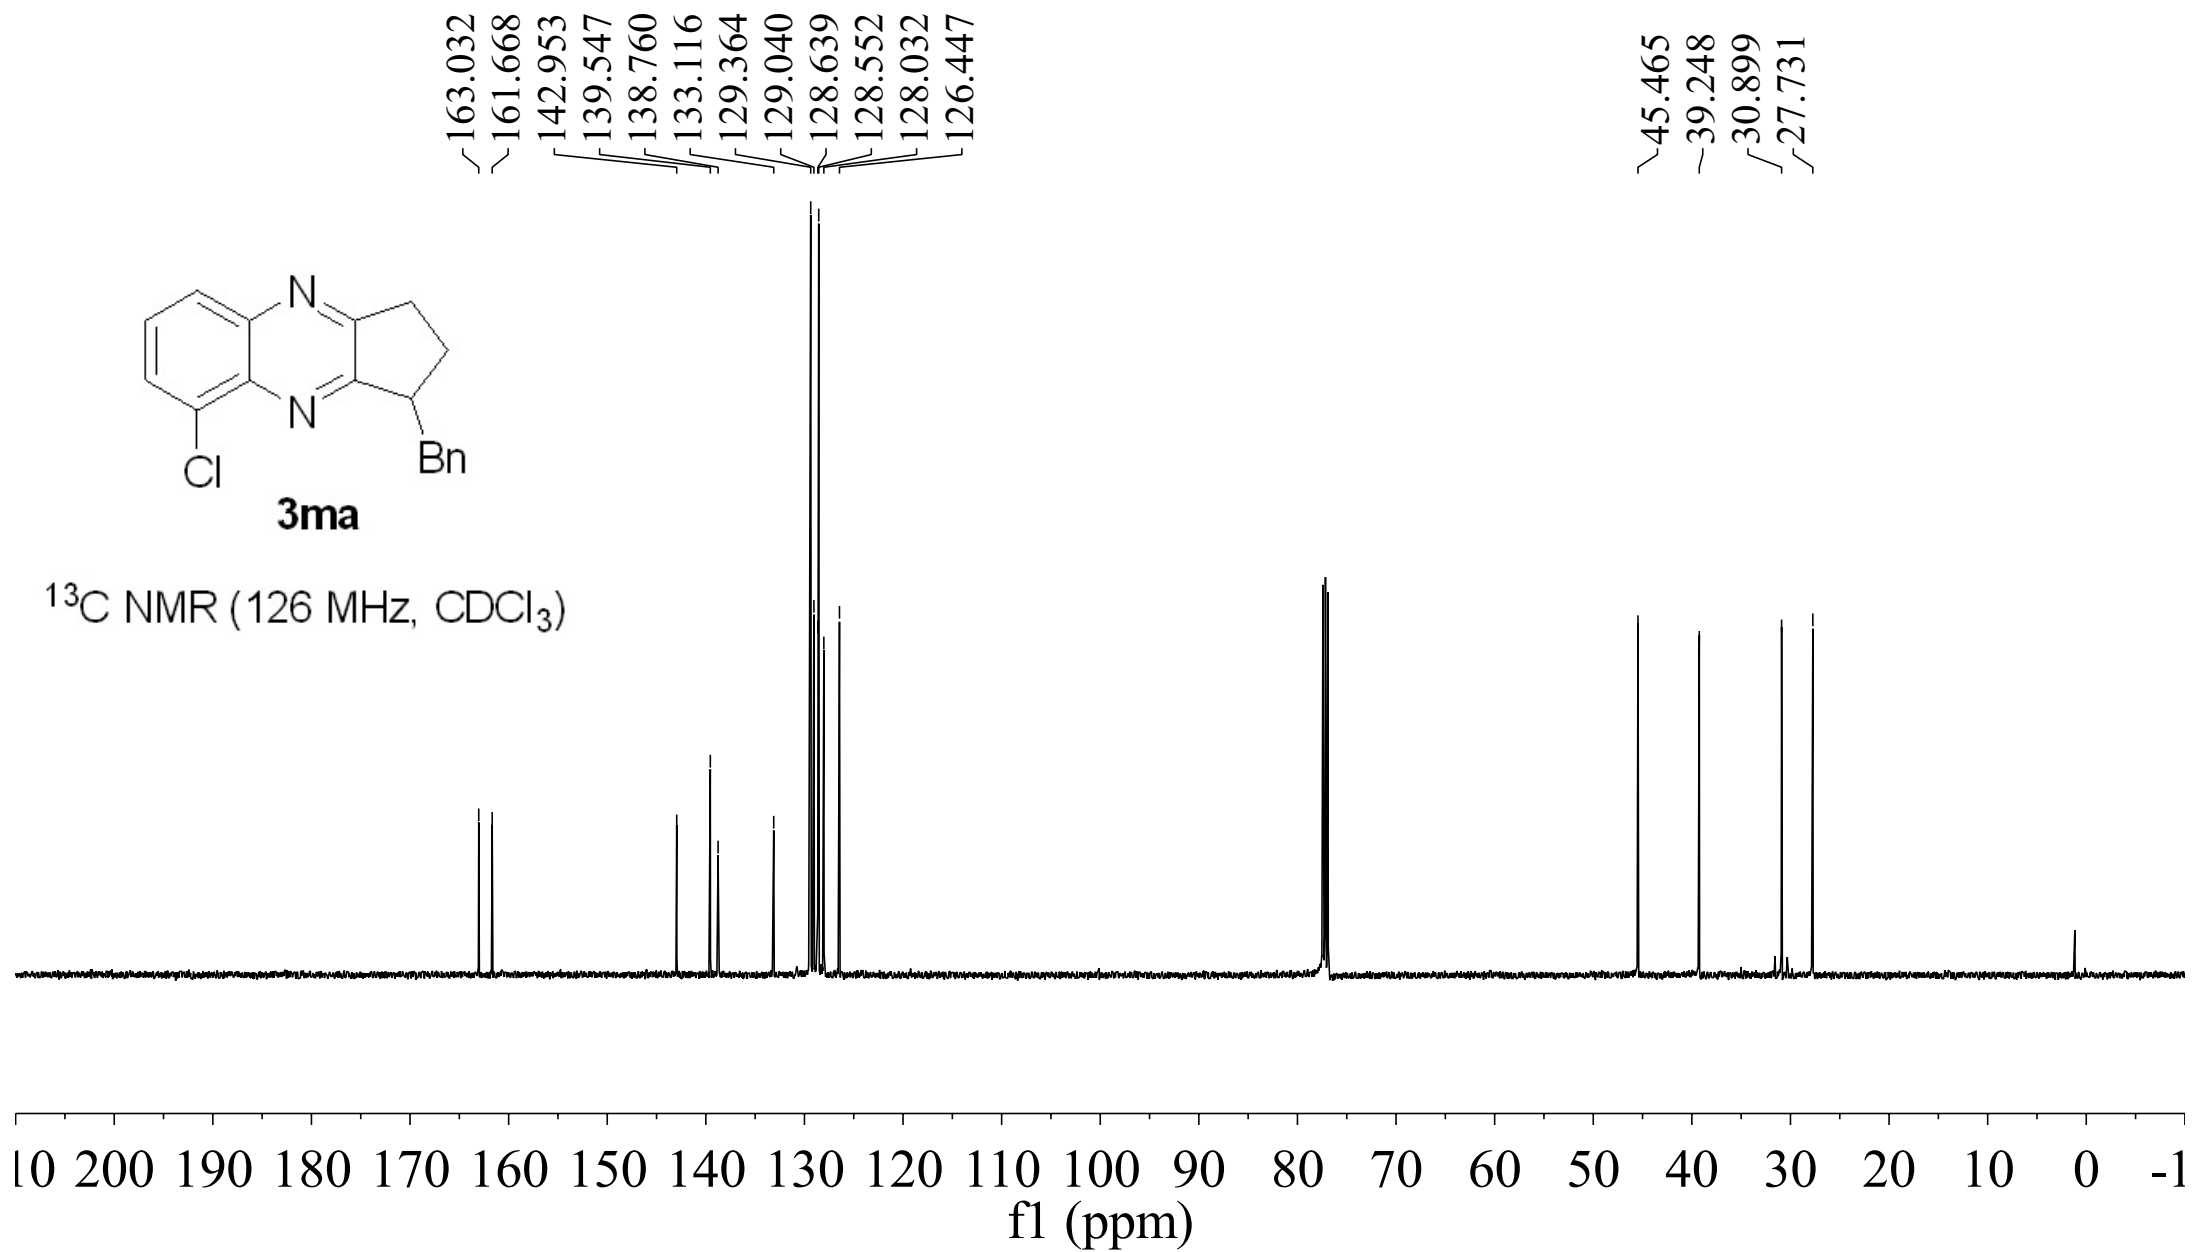

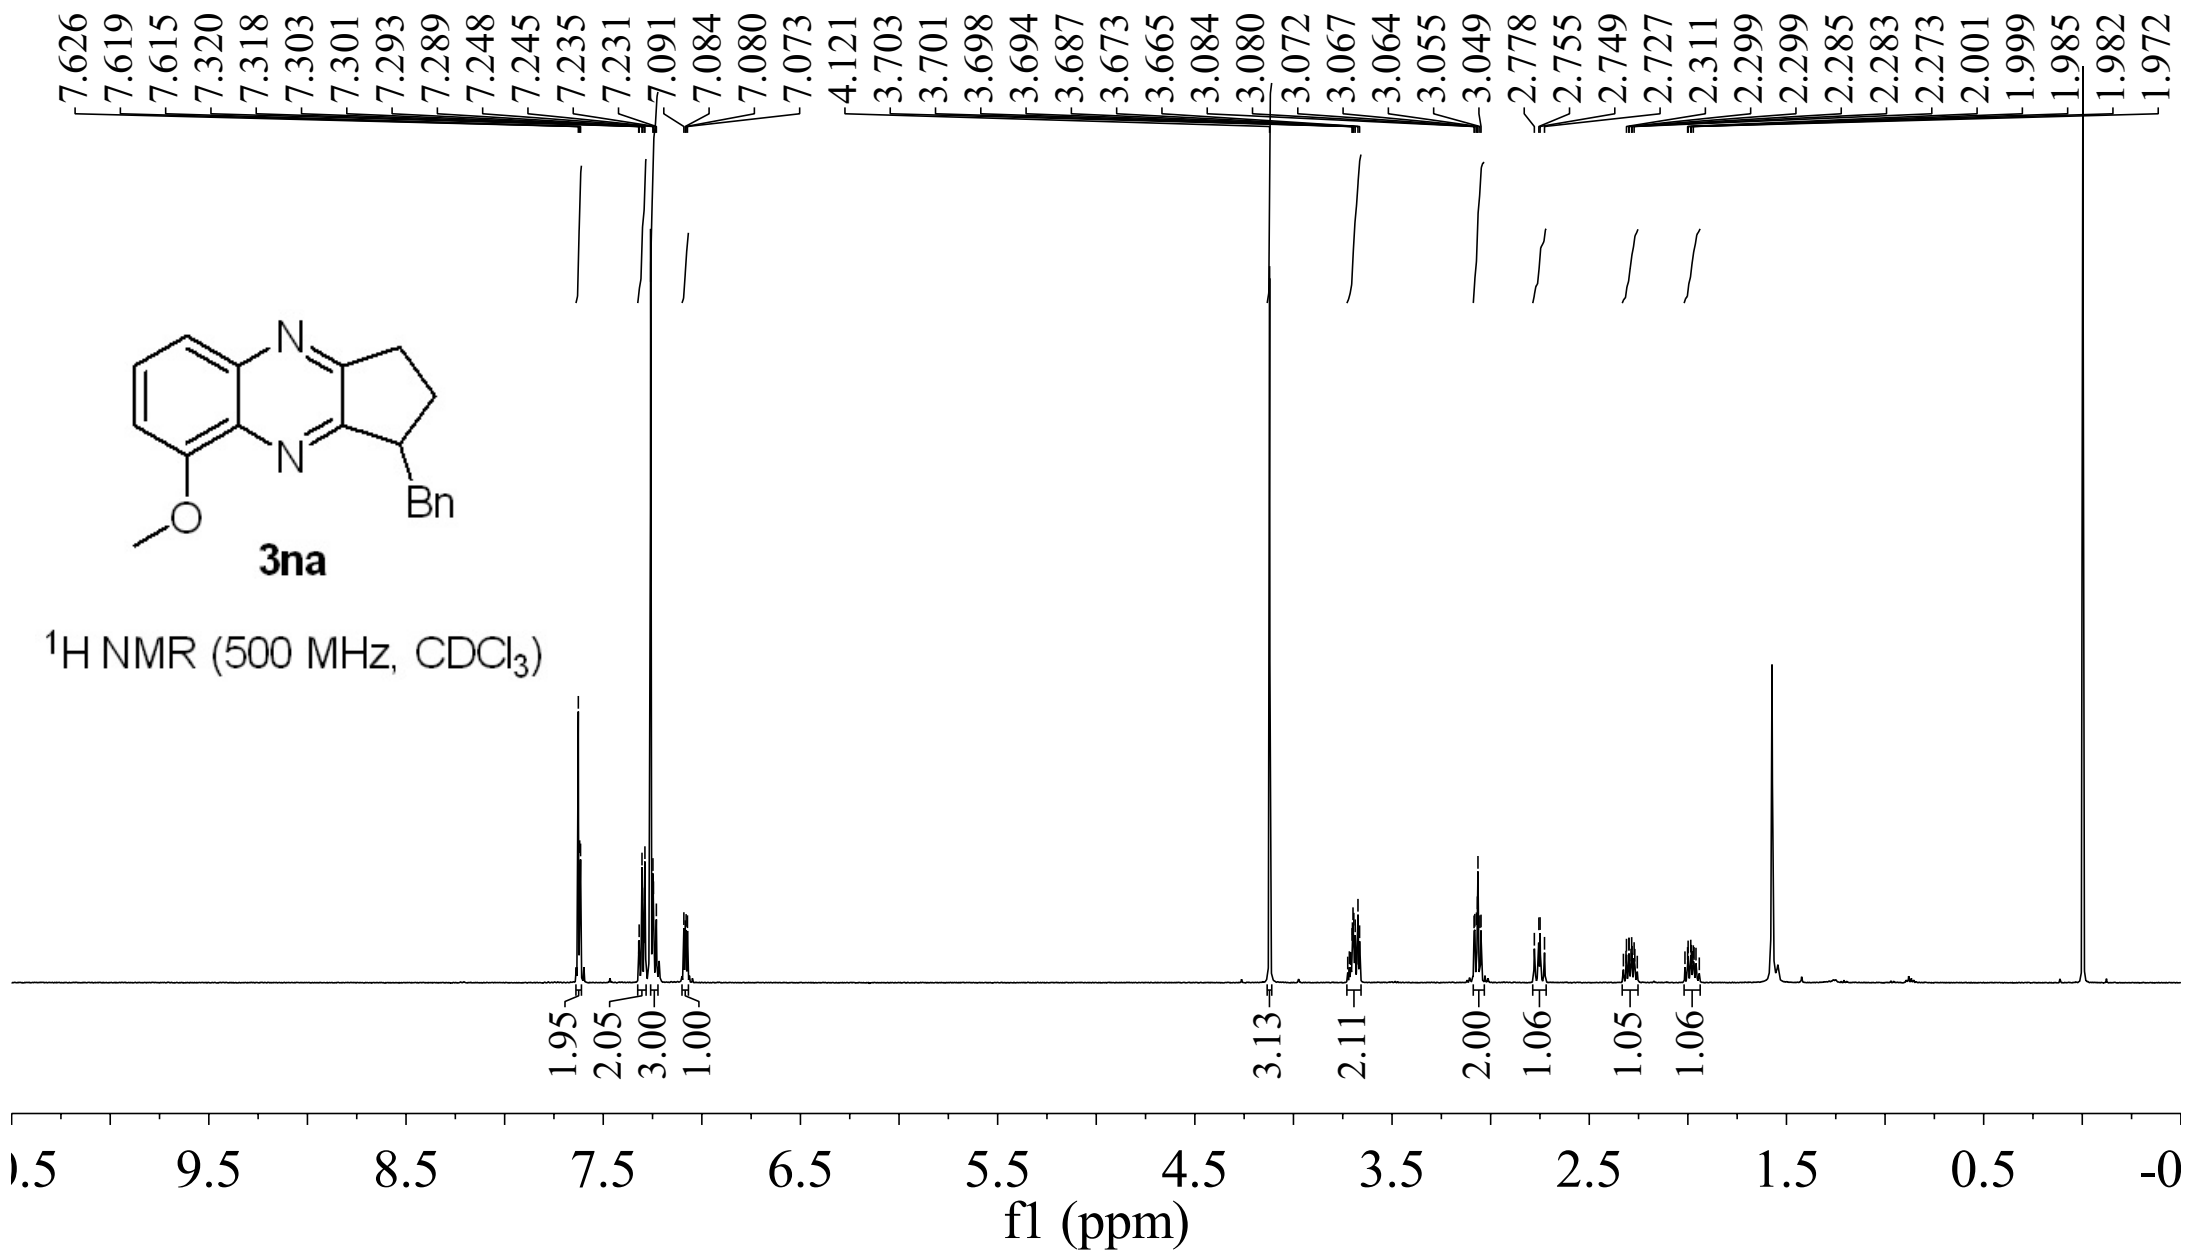

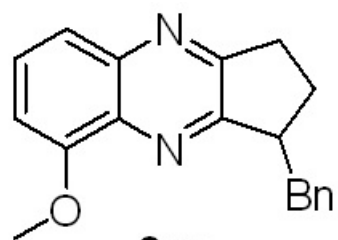

$^{13}\text{C}$  NMR (126 MHz,  $\text{CDCl}_3$ )

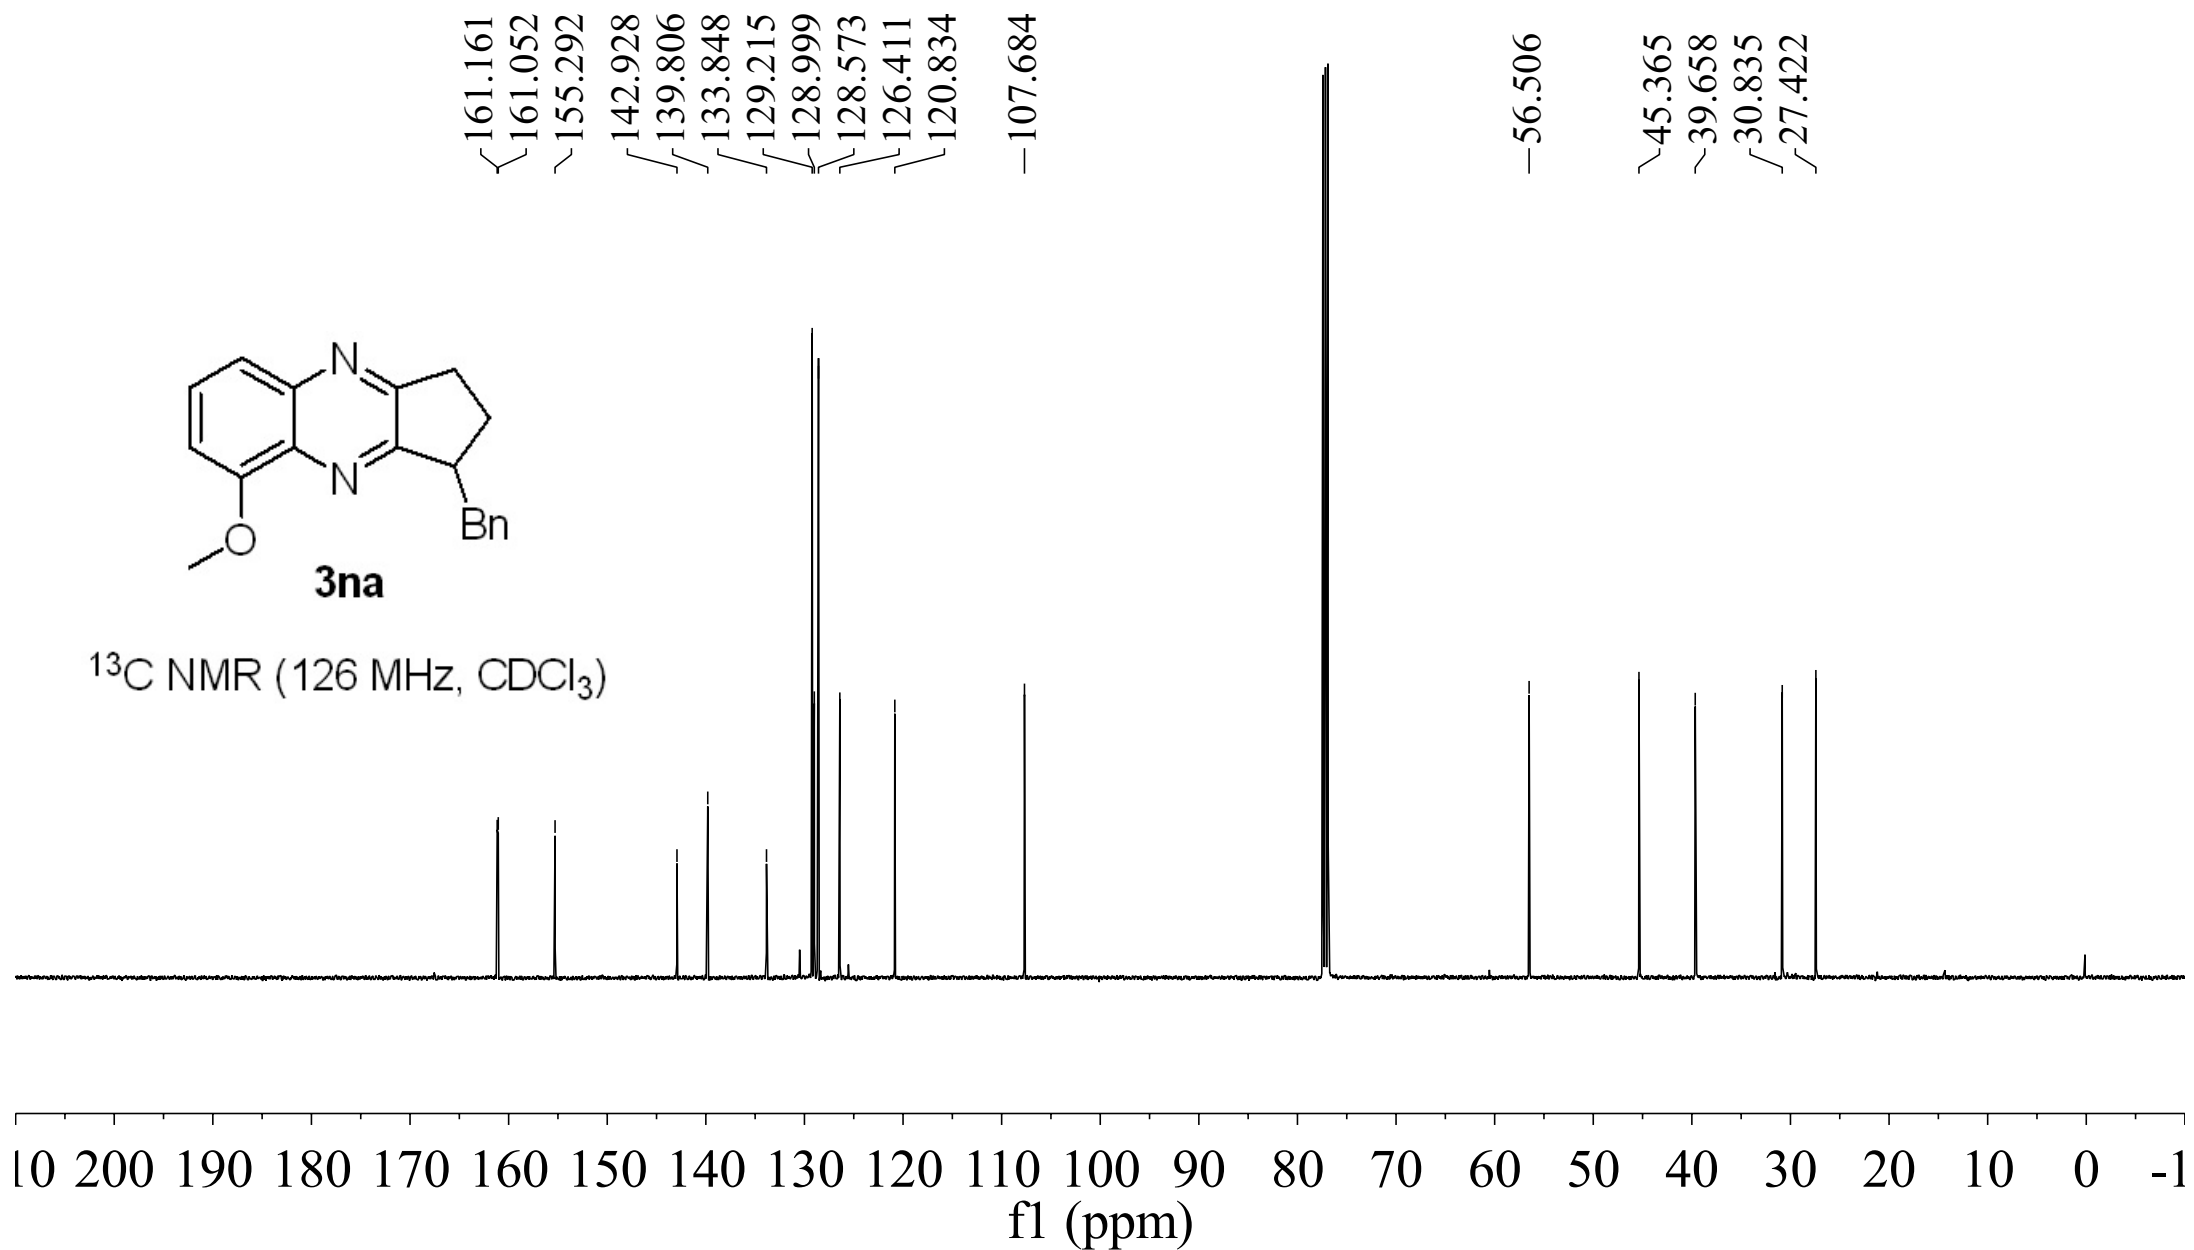

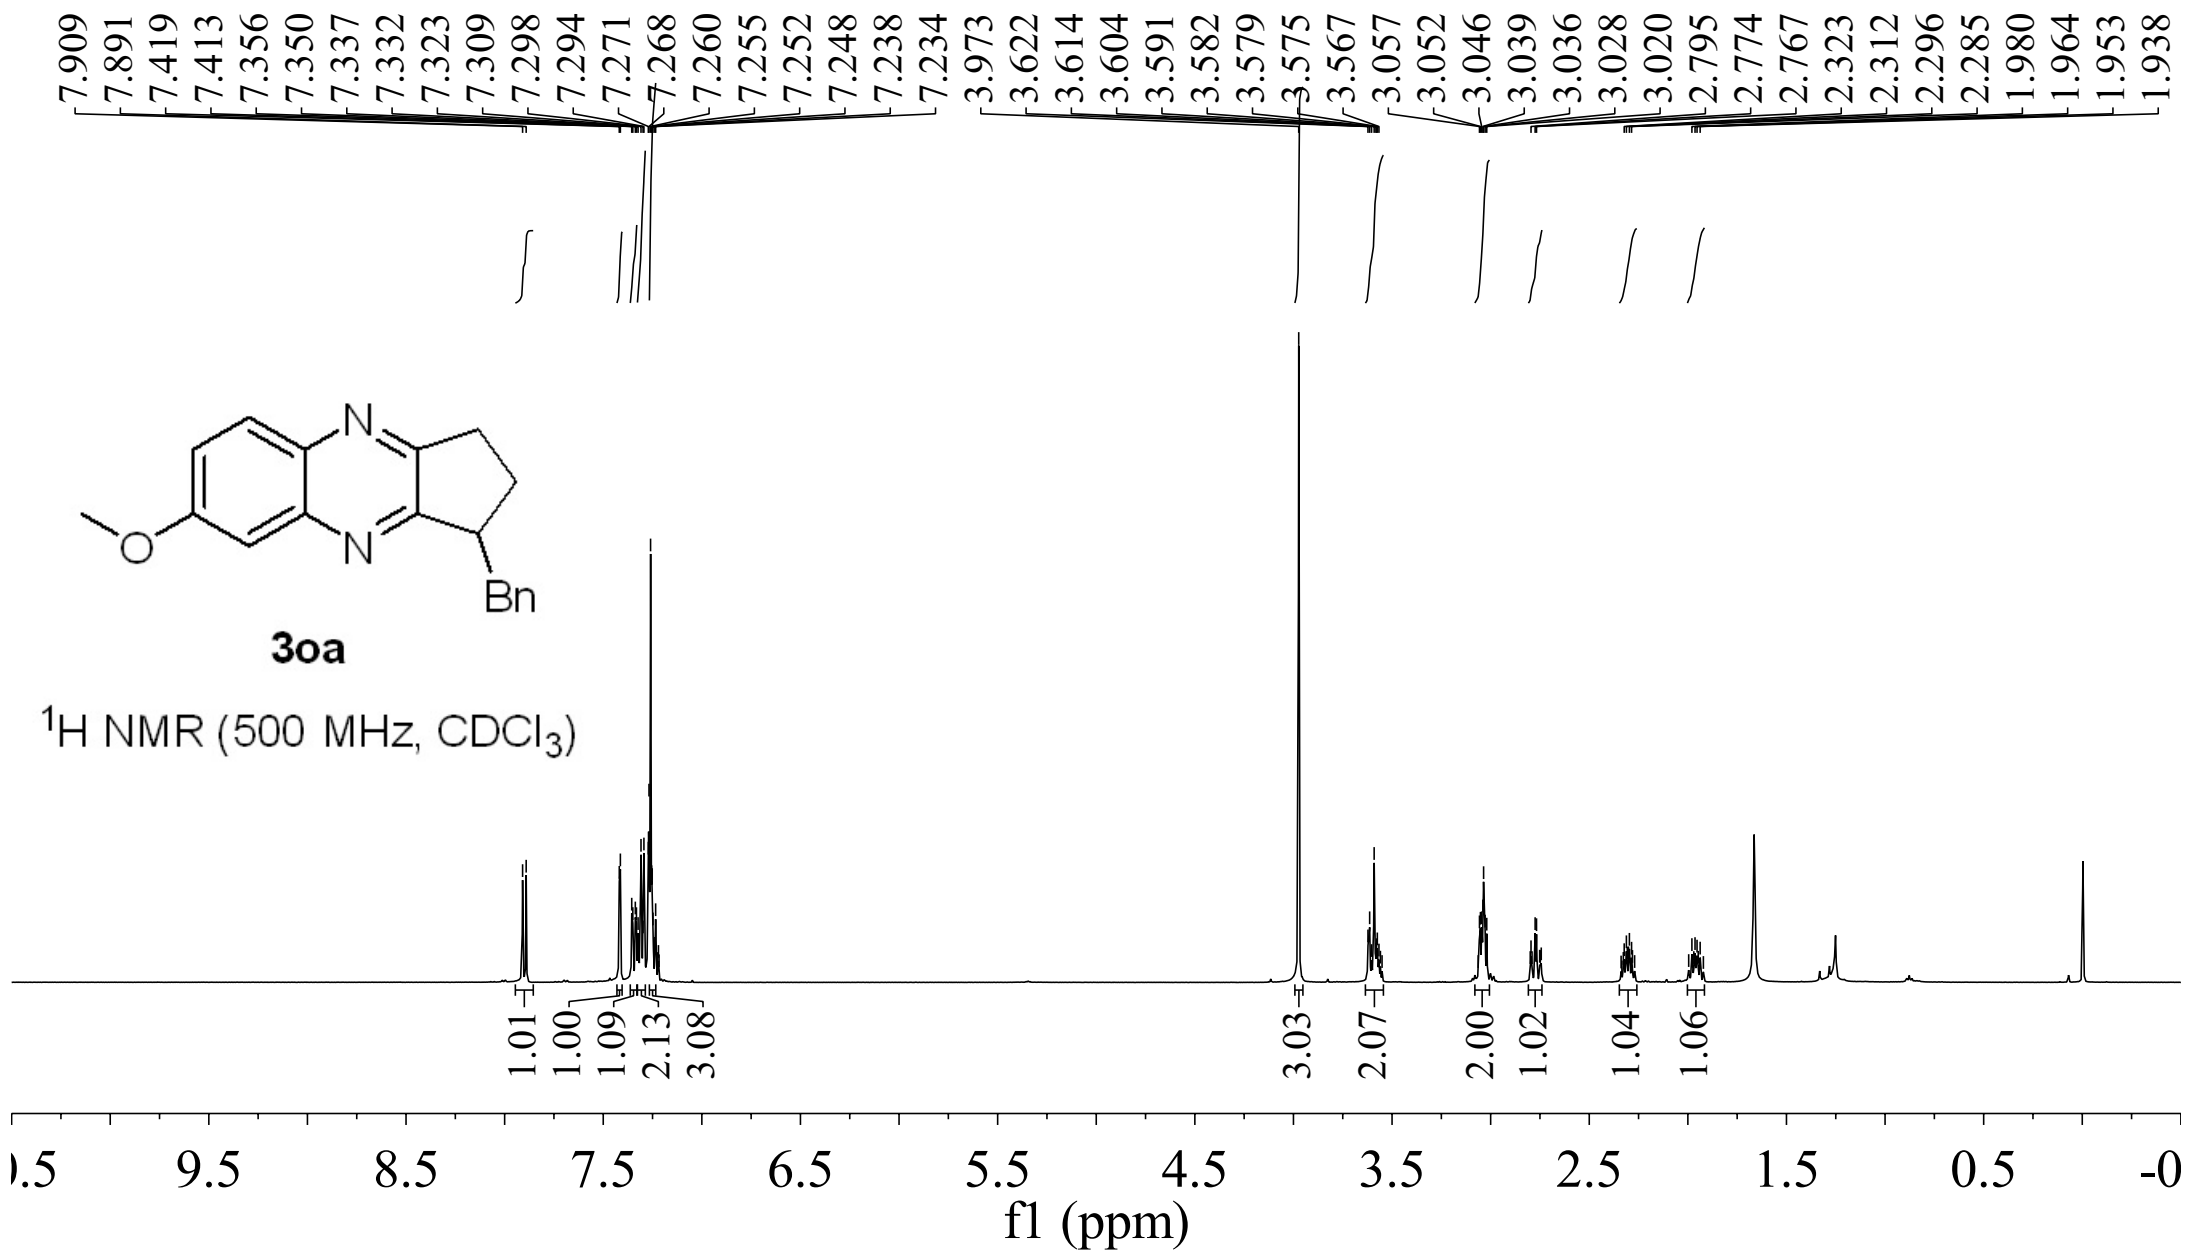

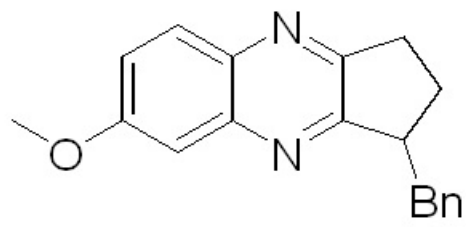

**30a**

$^{13}\text{C}$  NMR (126 MHz,  $\text{CDCl}_3$ )

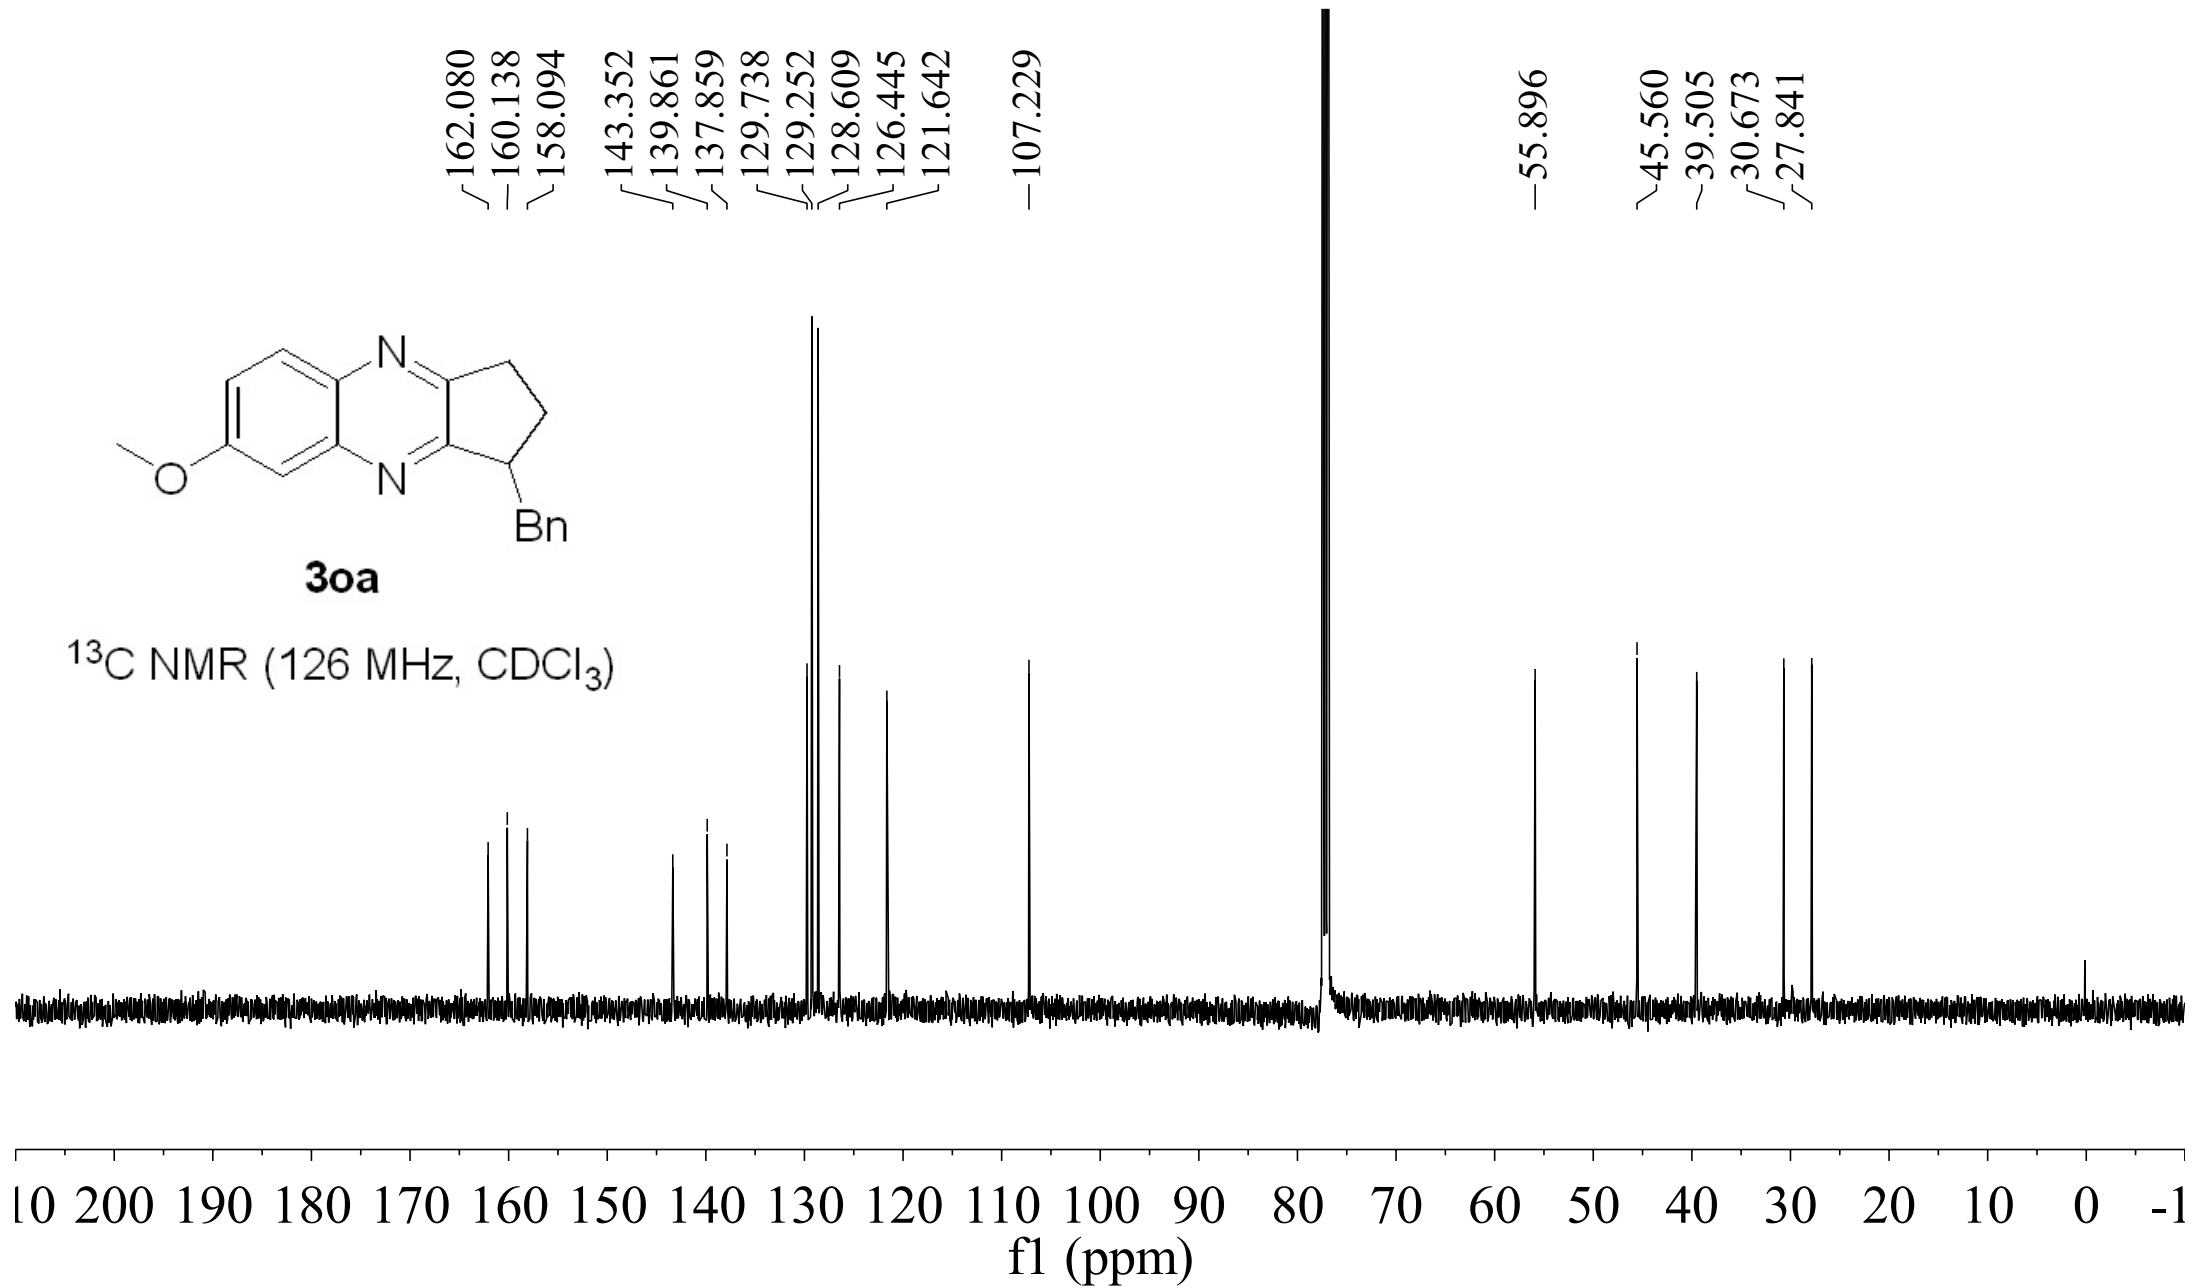

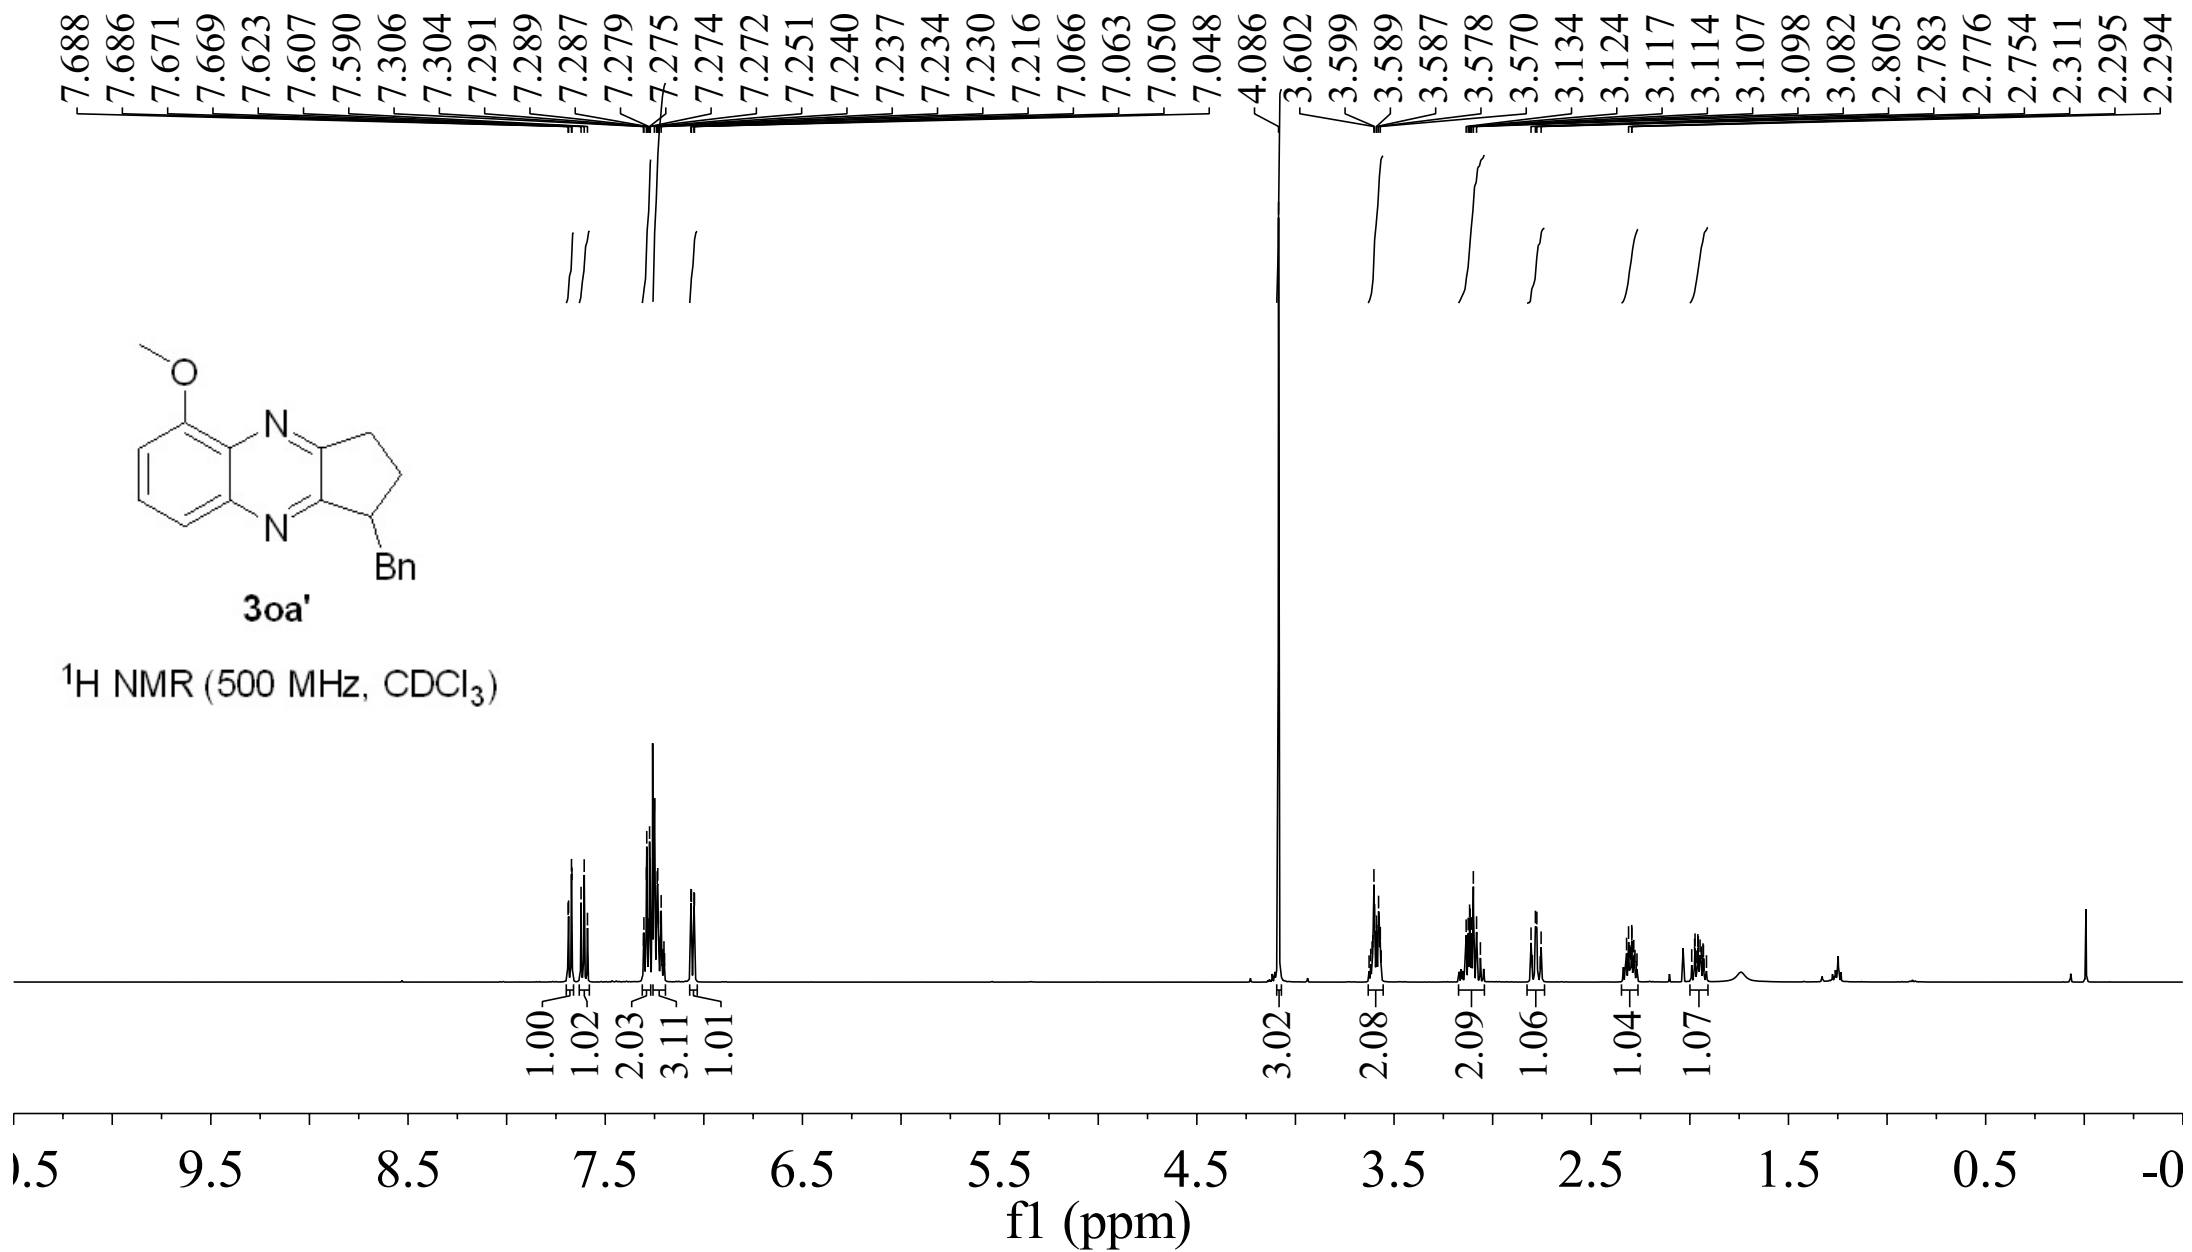



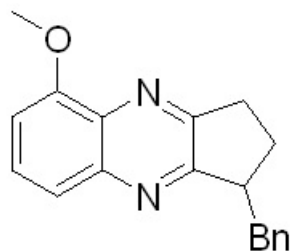

<sup>13</sup>C NMR (126 MHz, CDCl<sub>3</sub>)

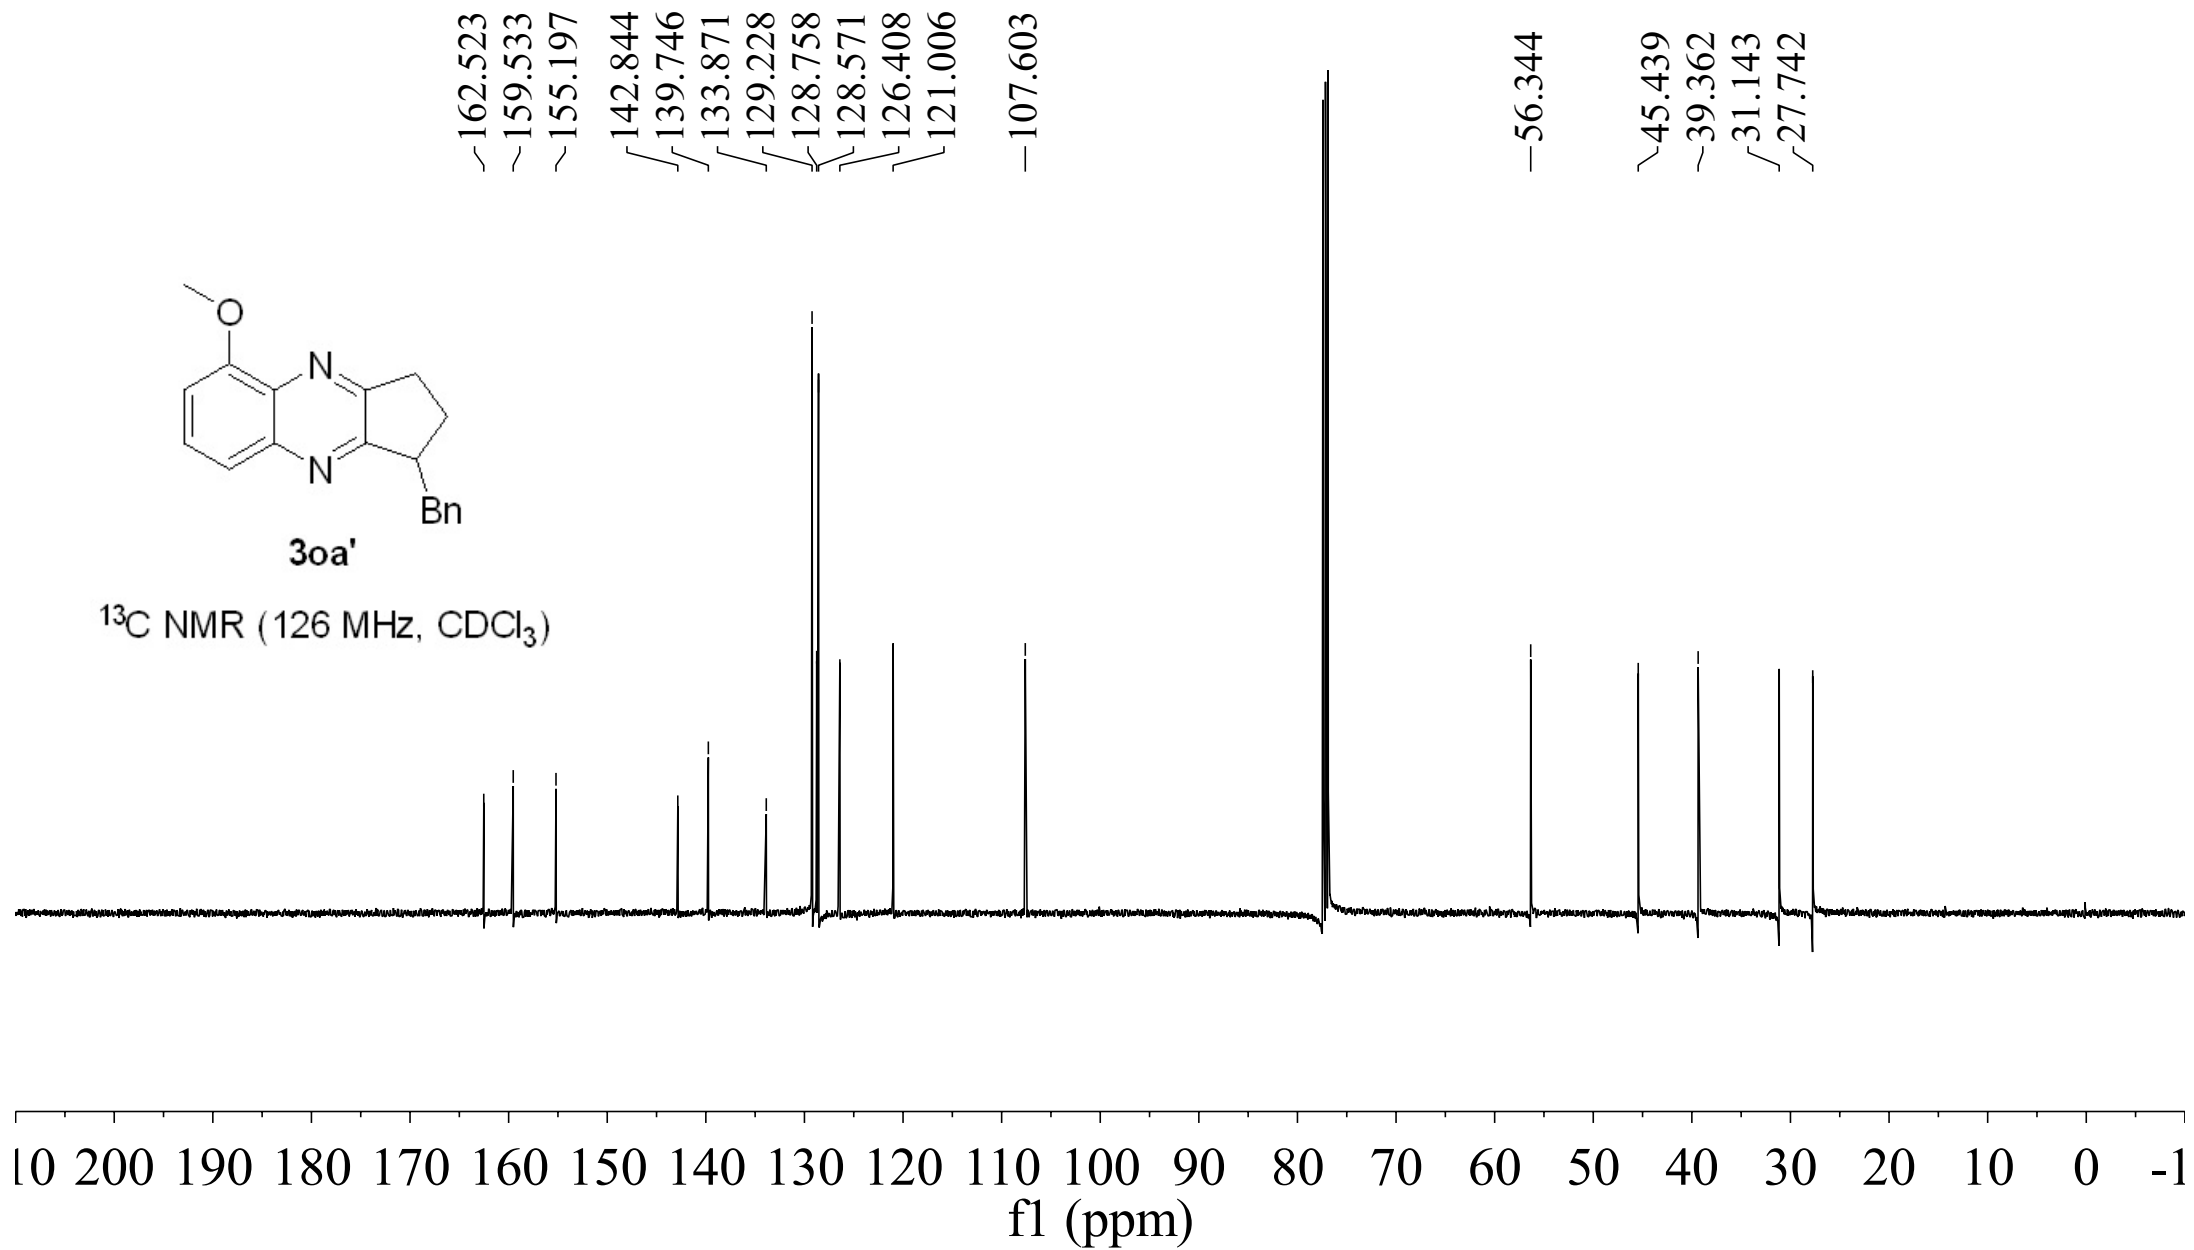

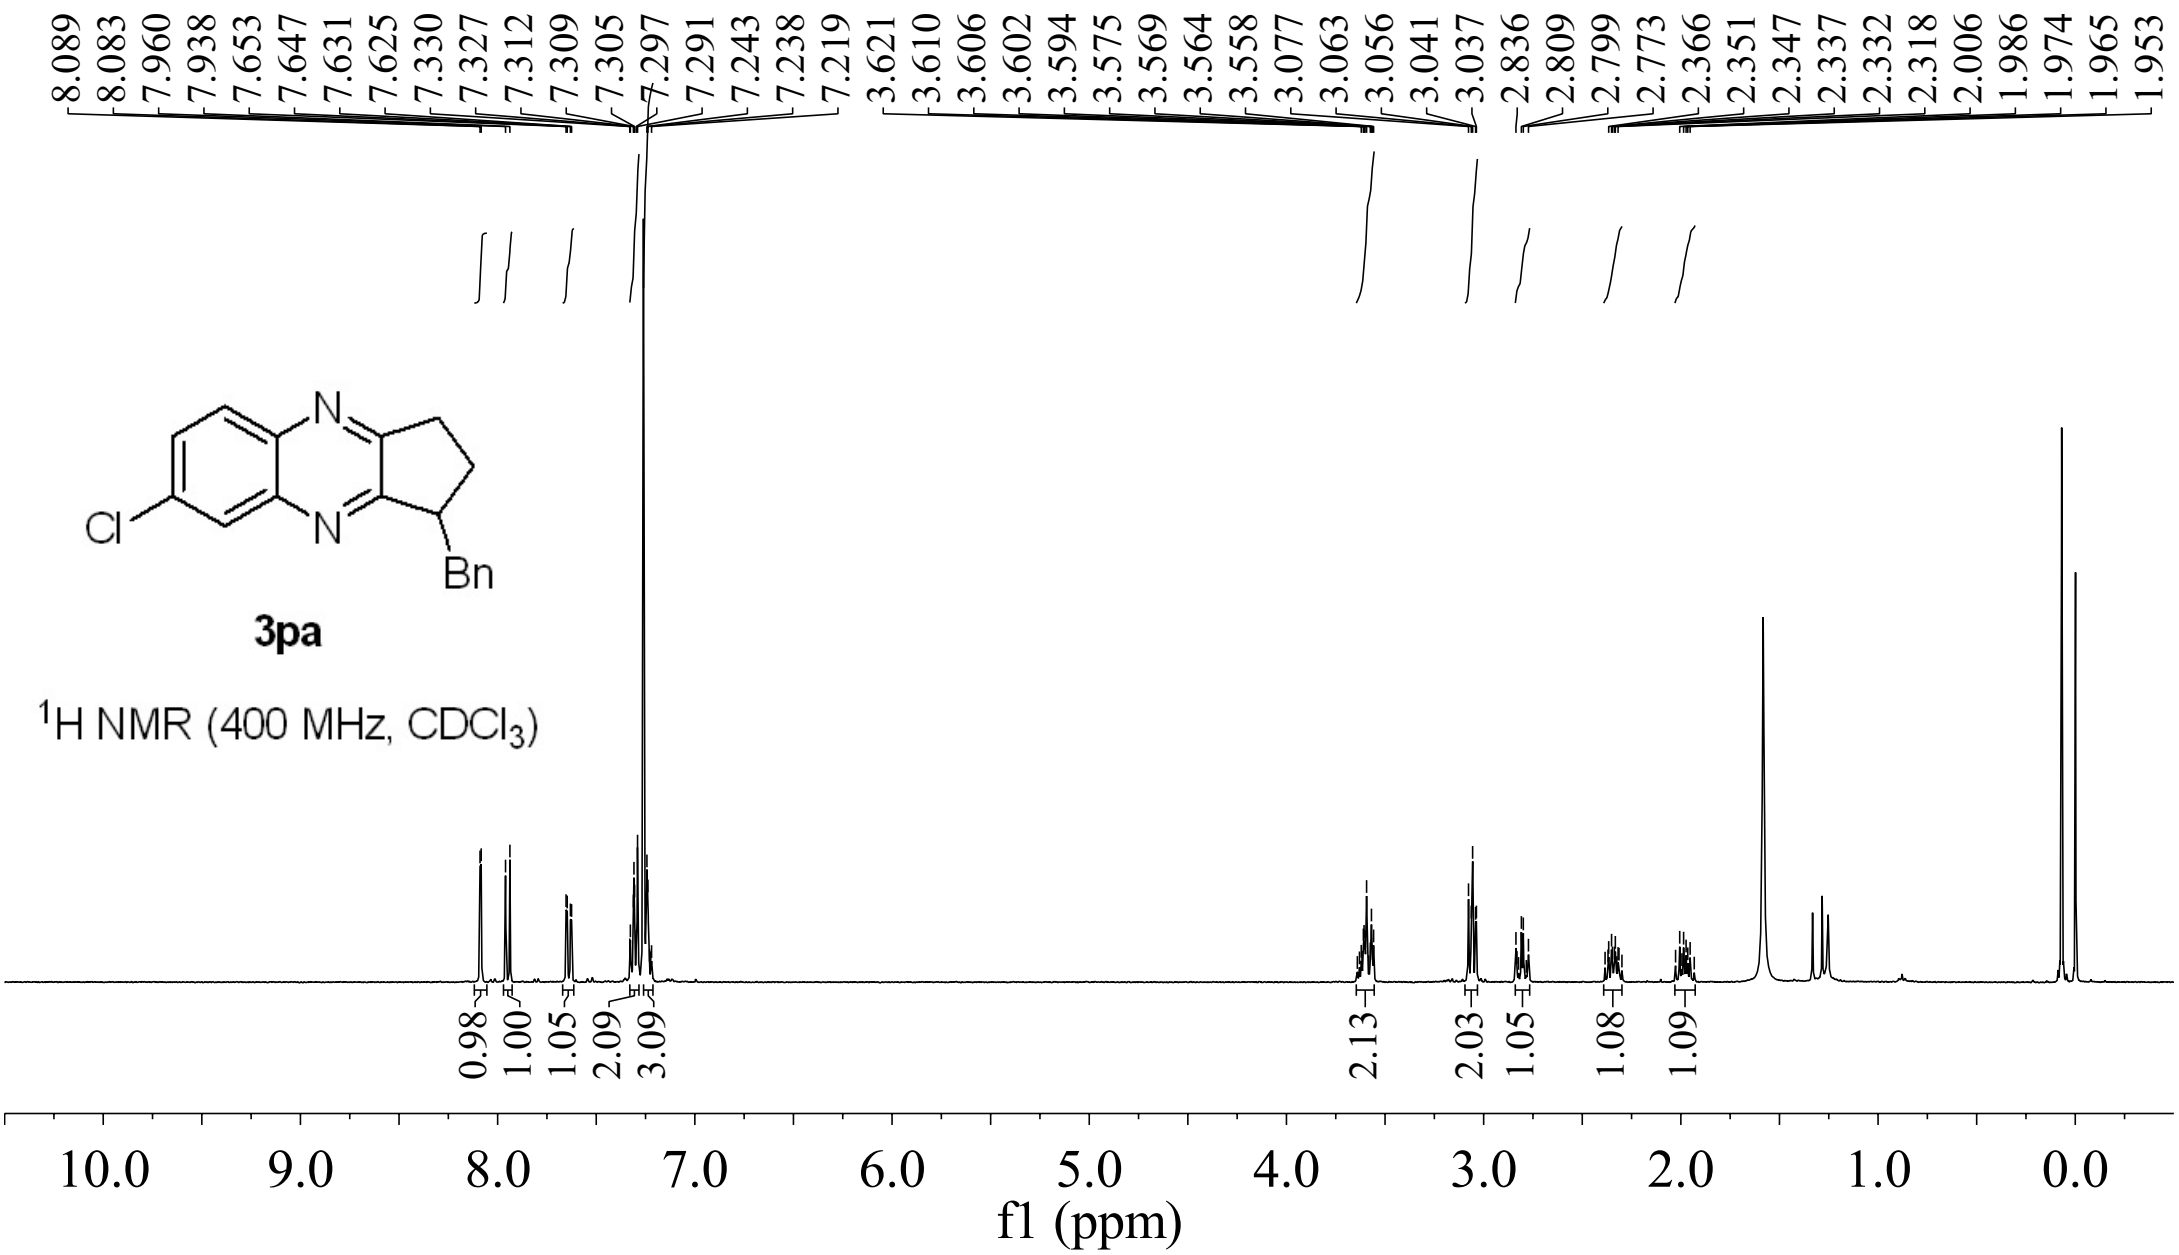

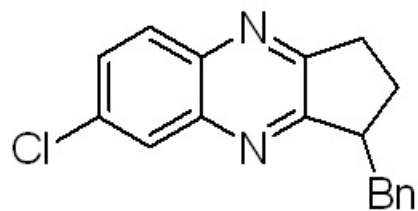

**3pa**

$^{13}\text{C}$  NMR (151 MHz,  $\text{CDCl}_3$ )

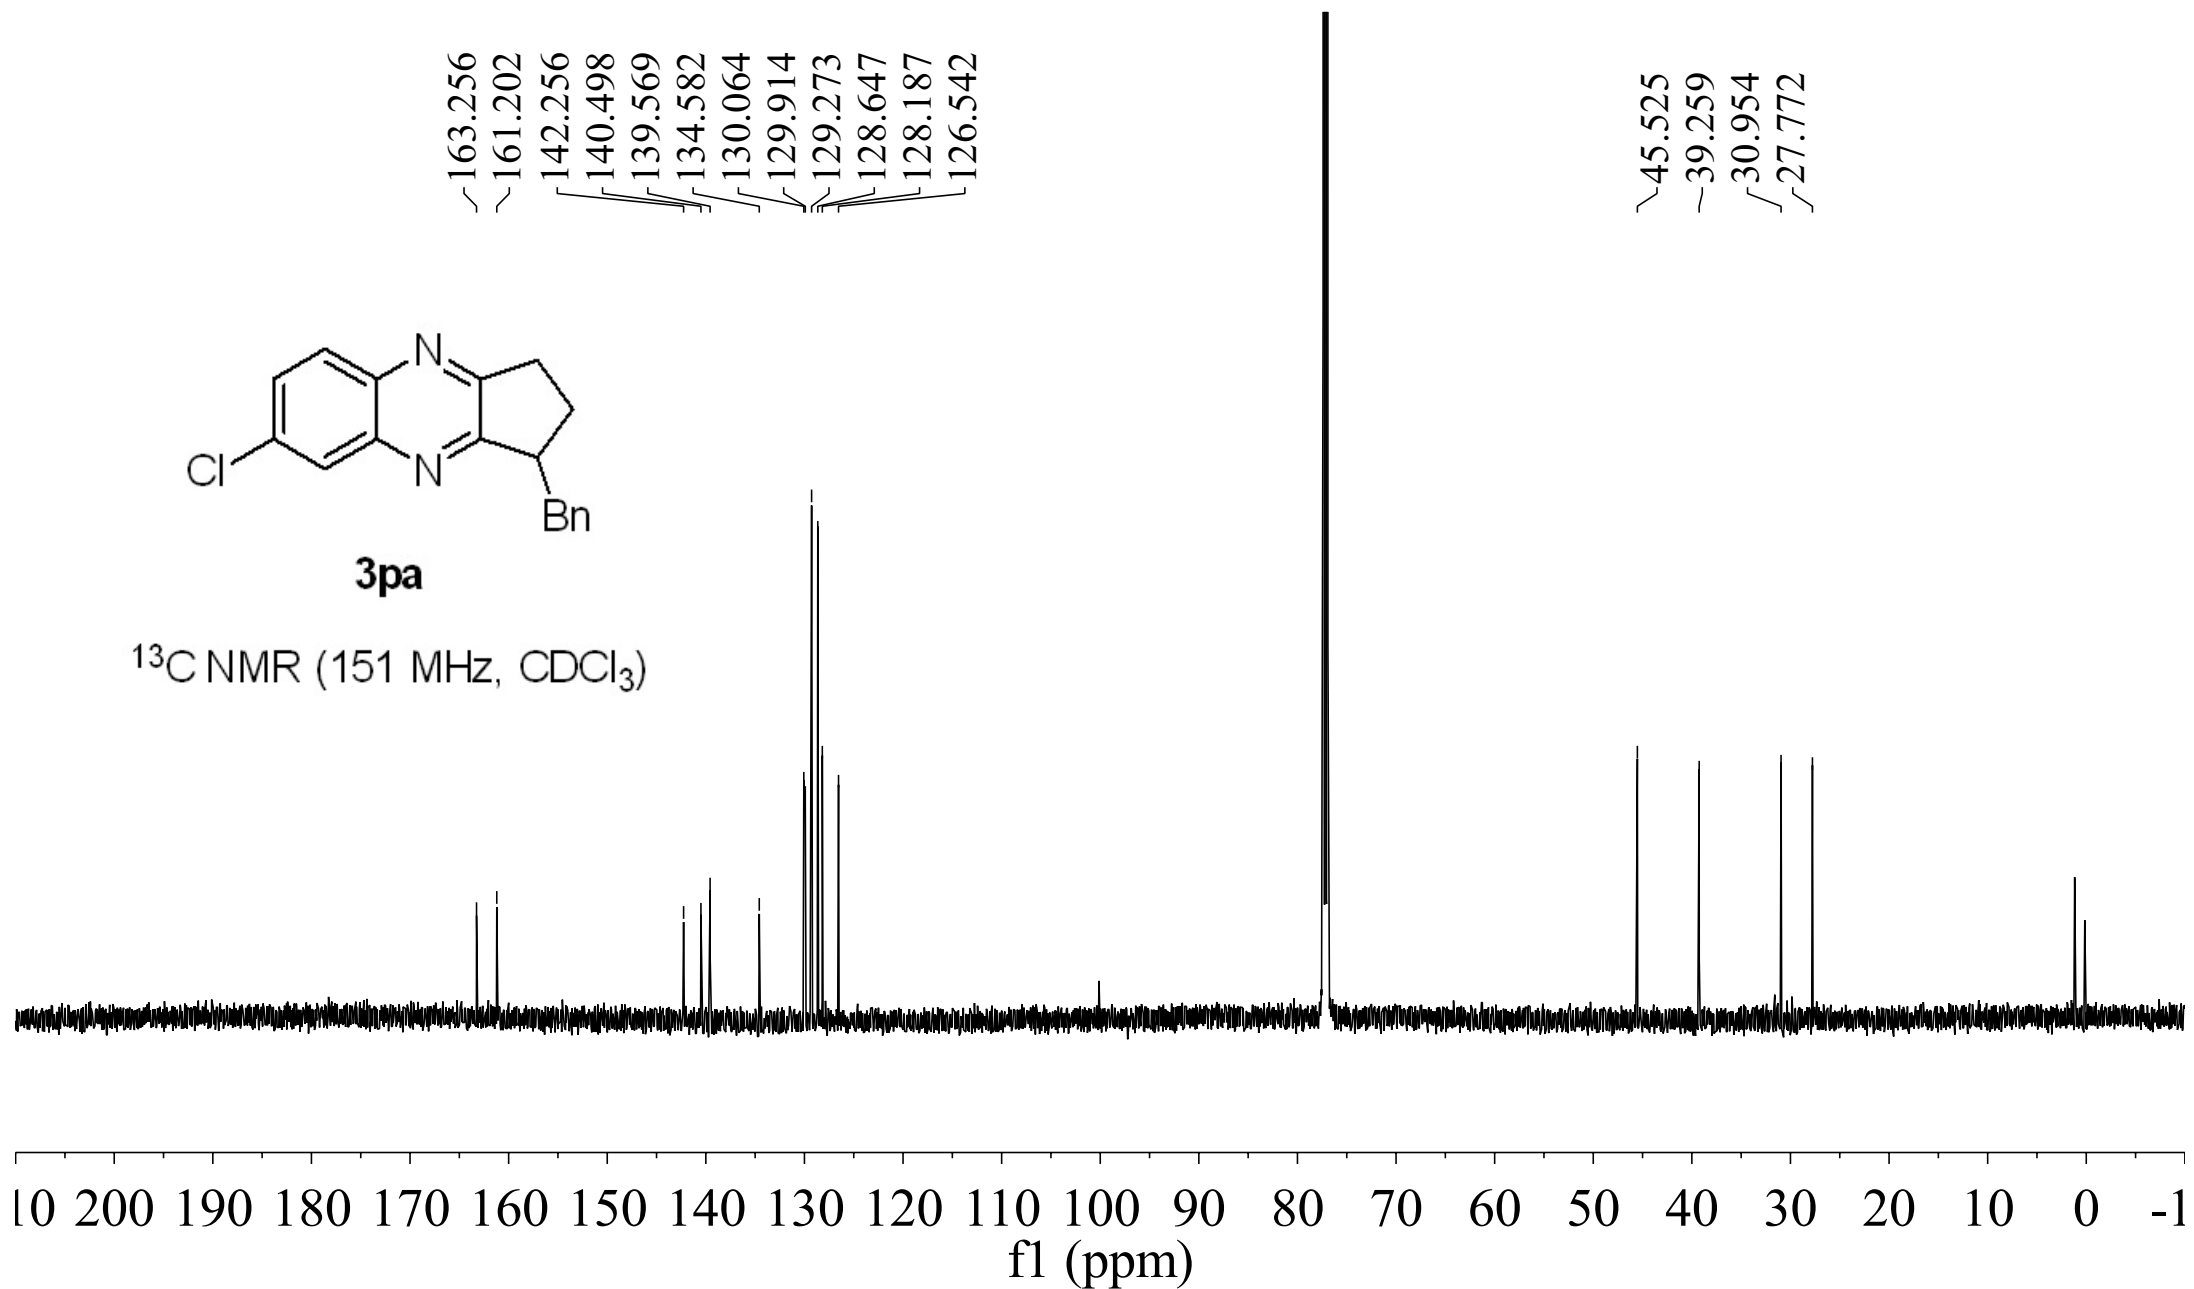

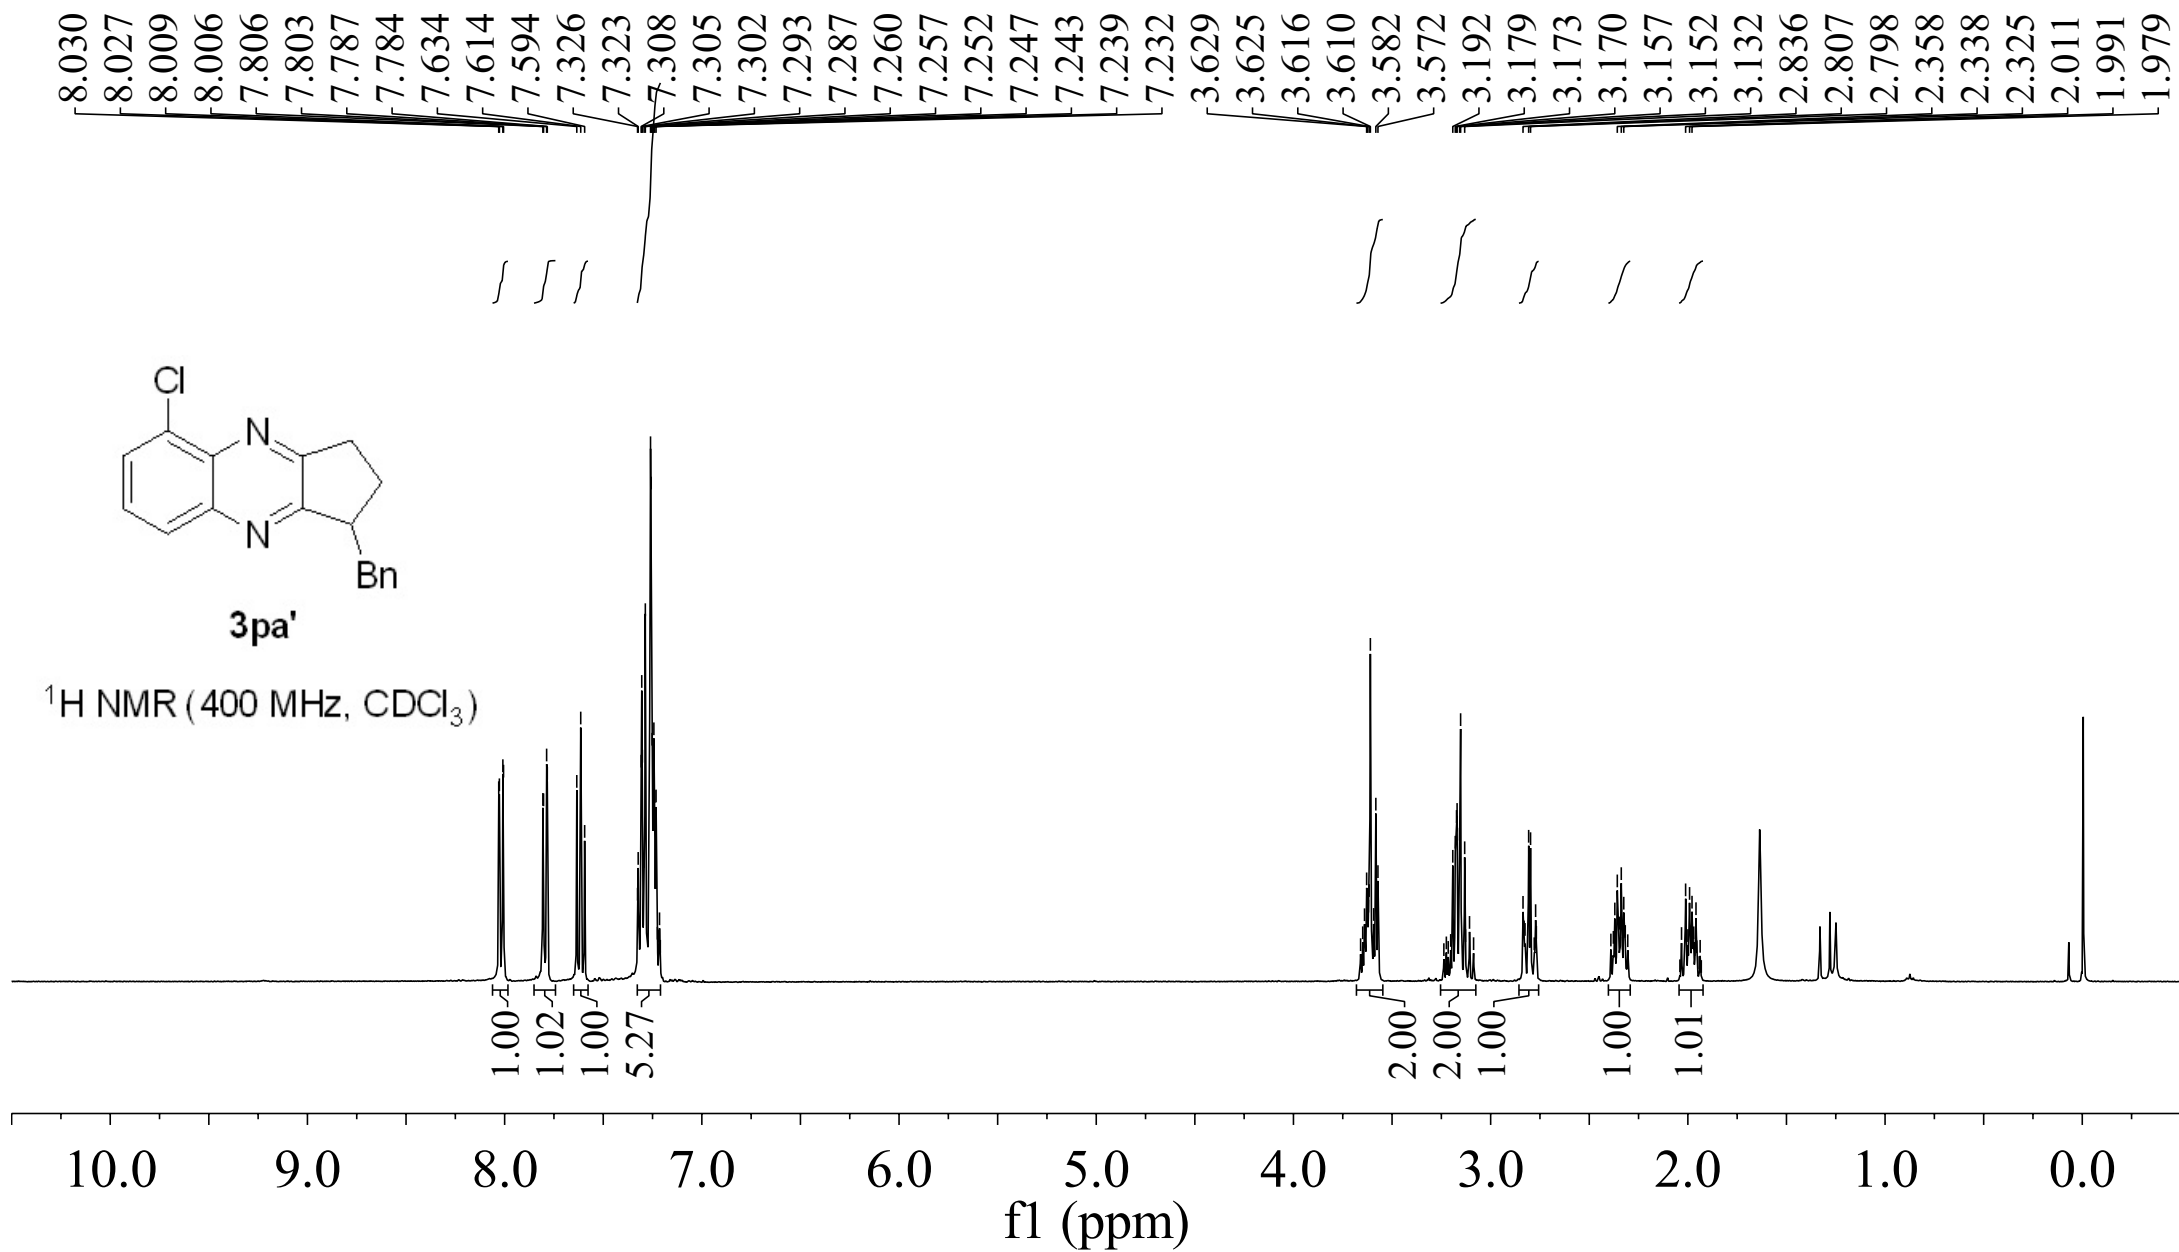

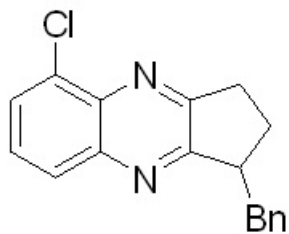

3pa'

$^{13}\text{C}$  NMR (101 MHz,  $\text{CDCl}_3$ )

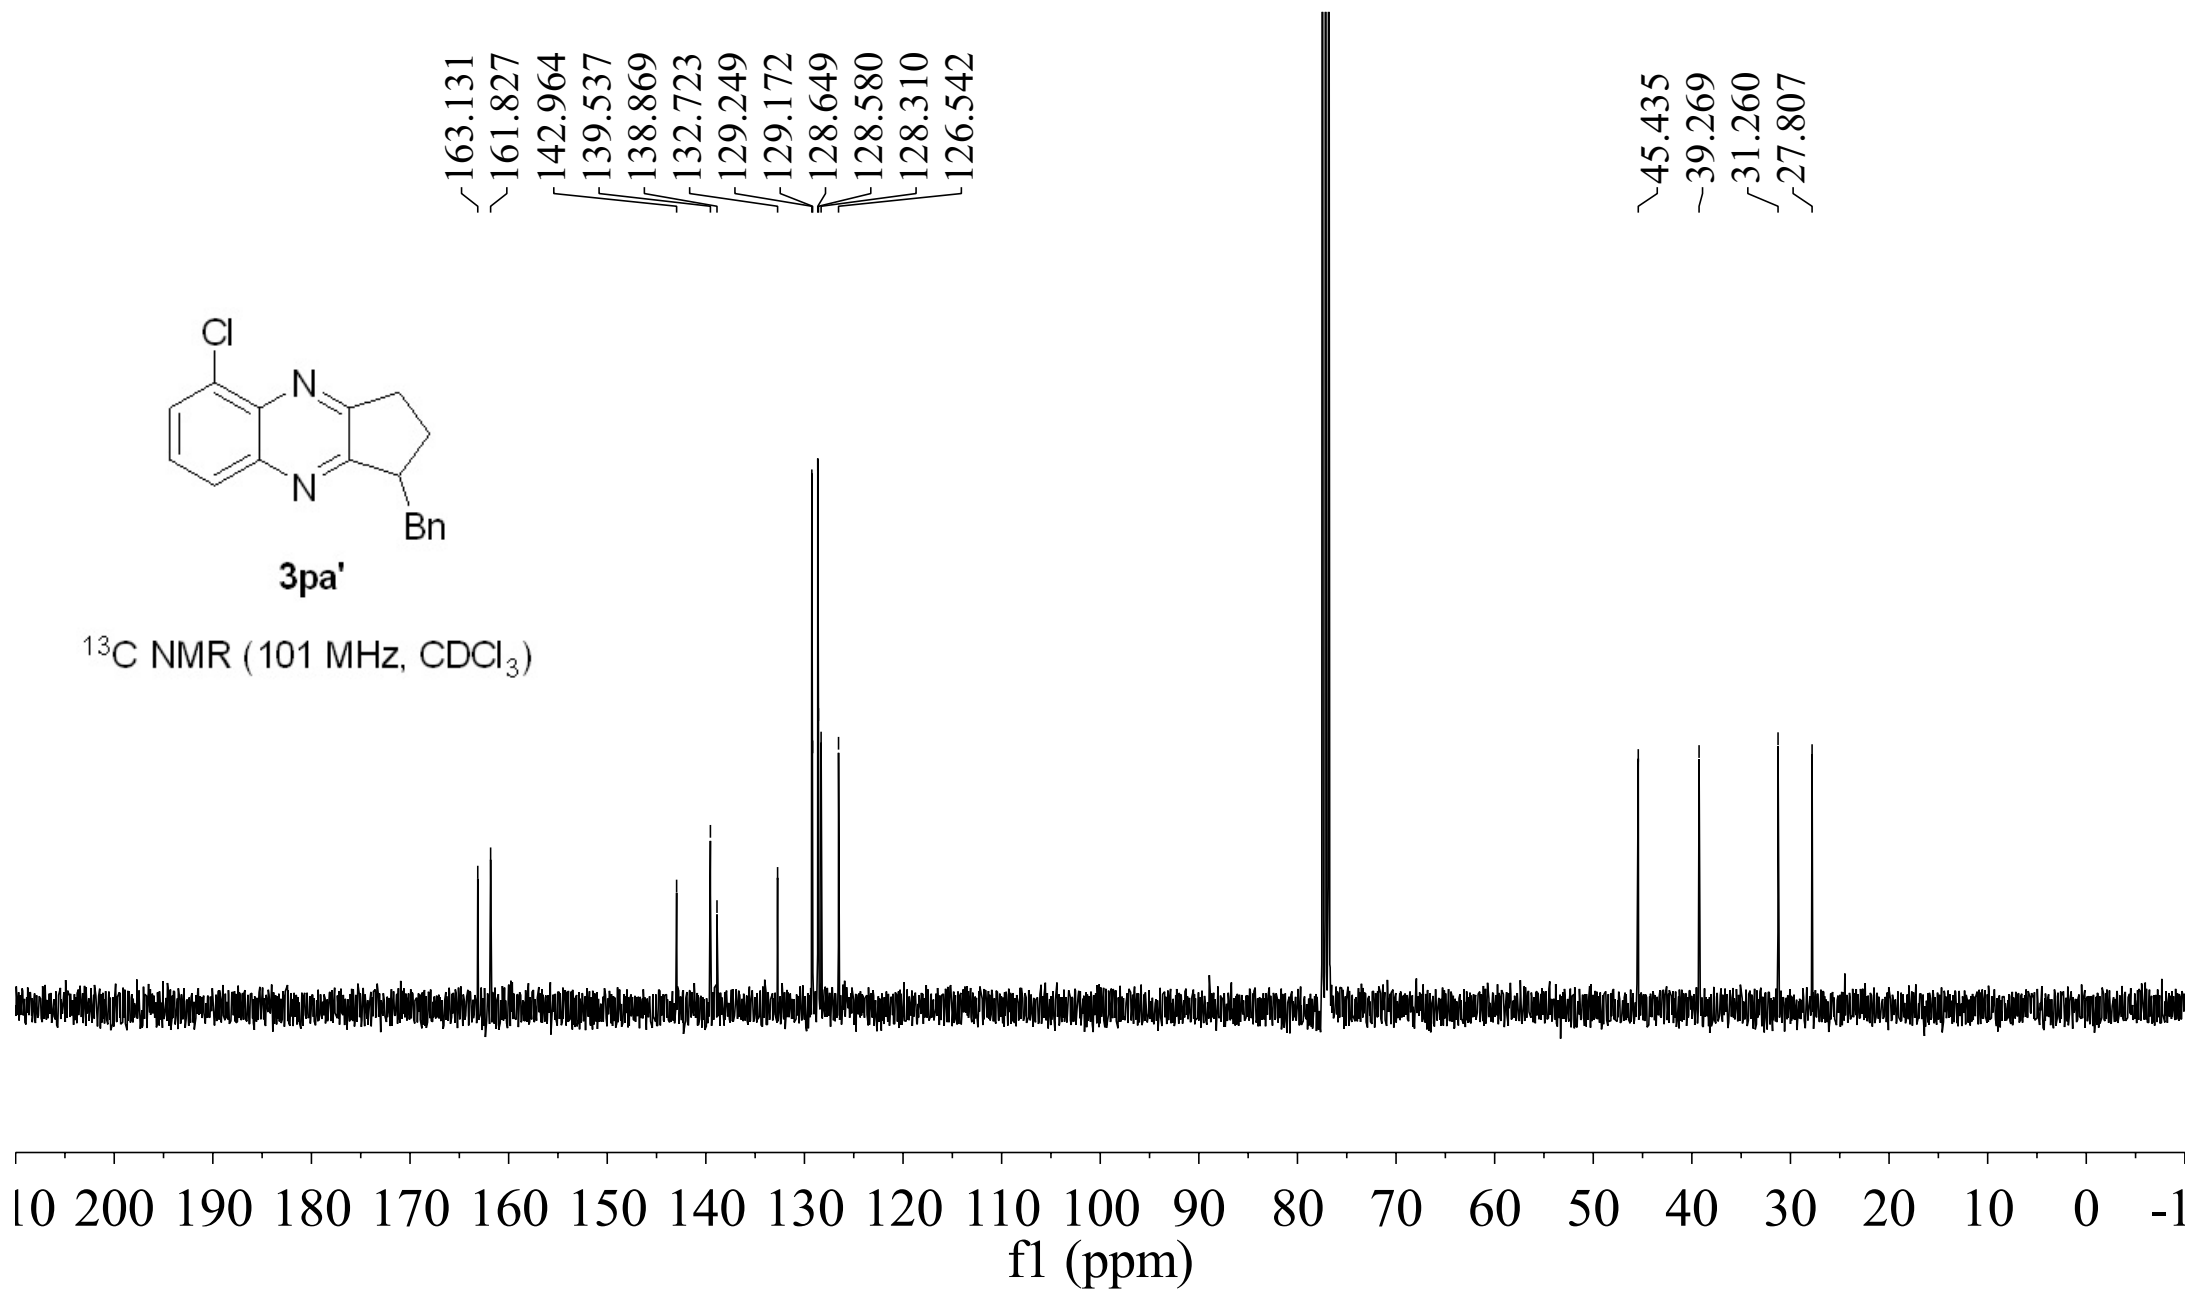

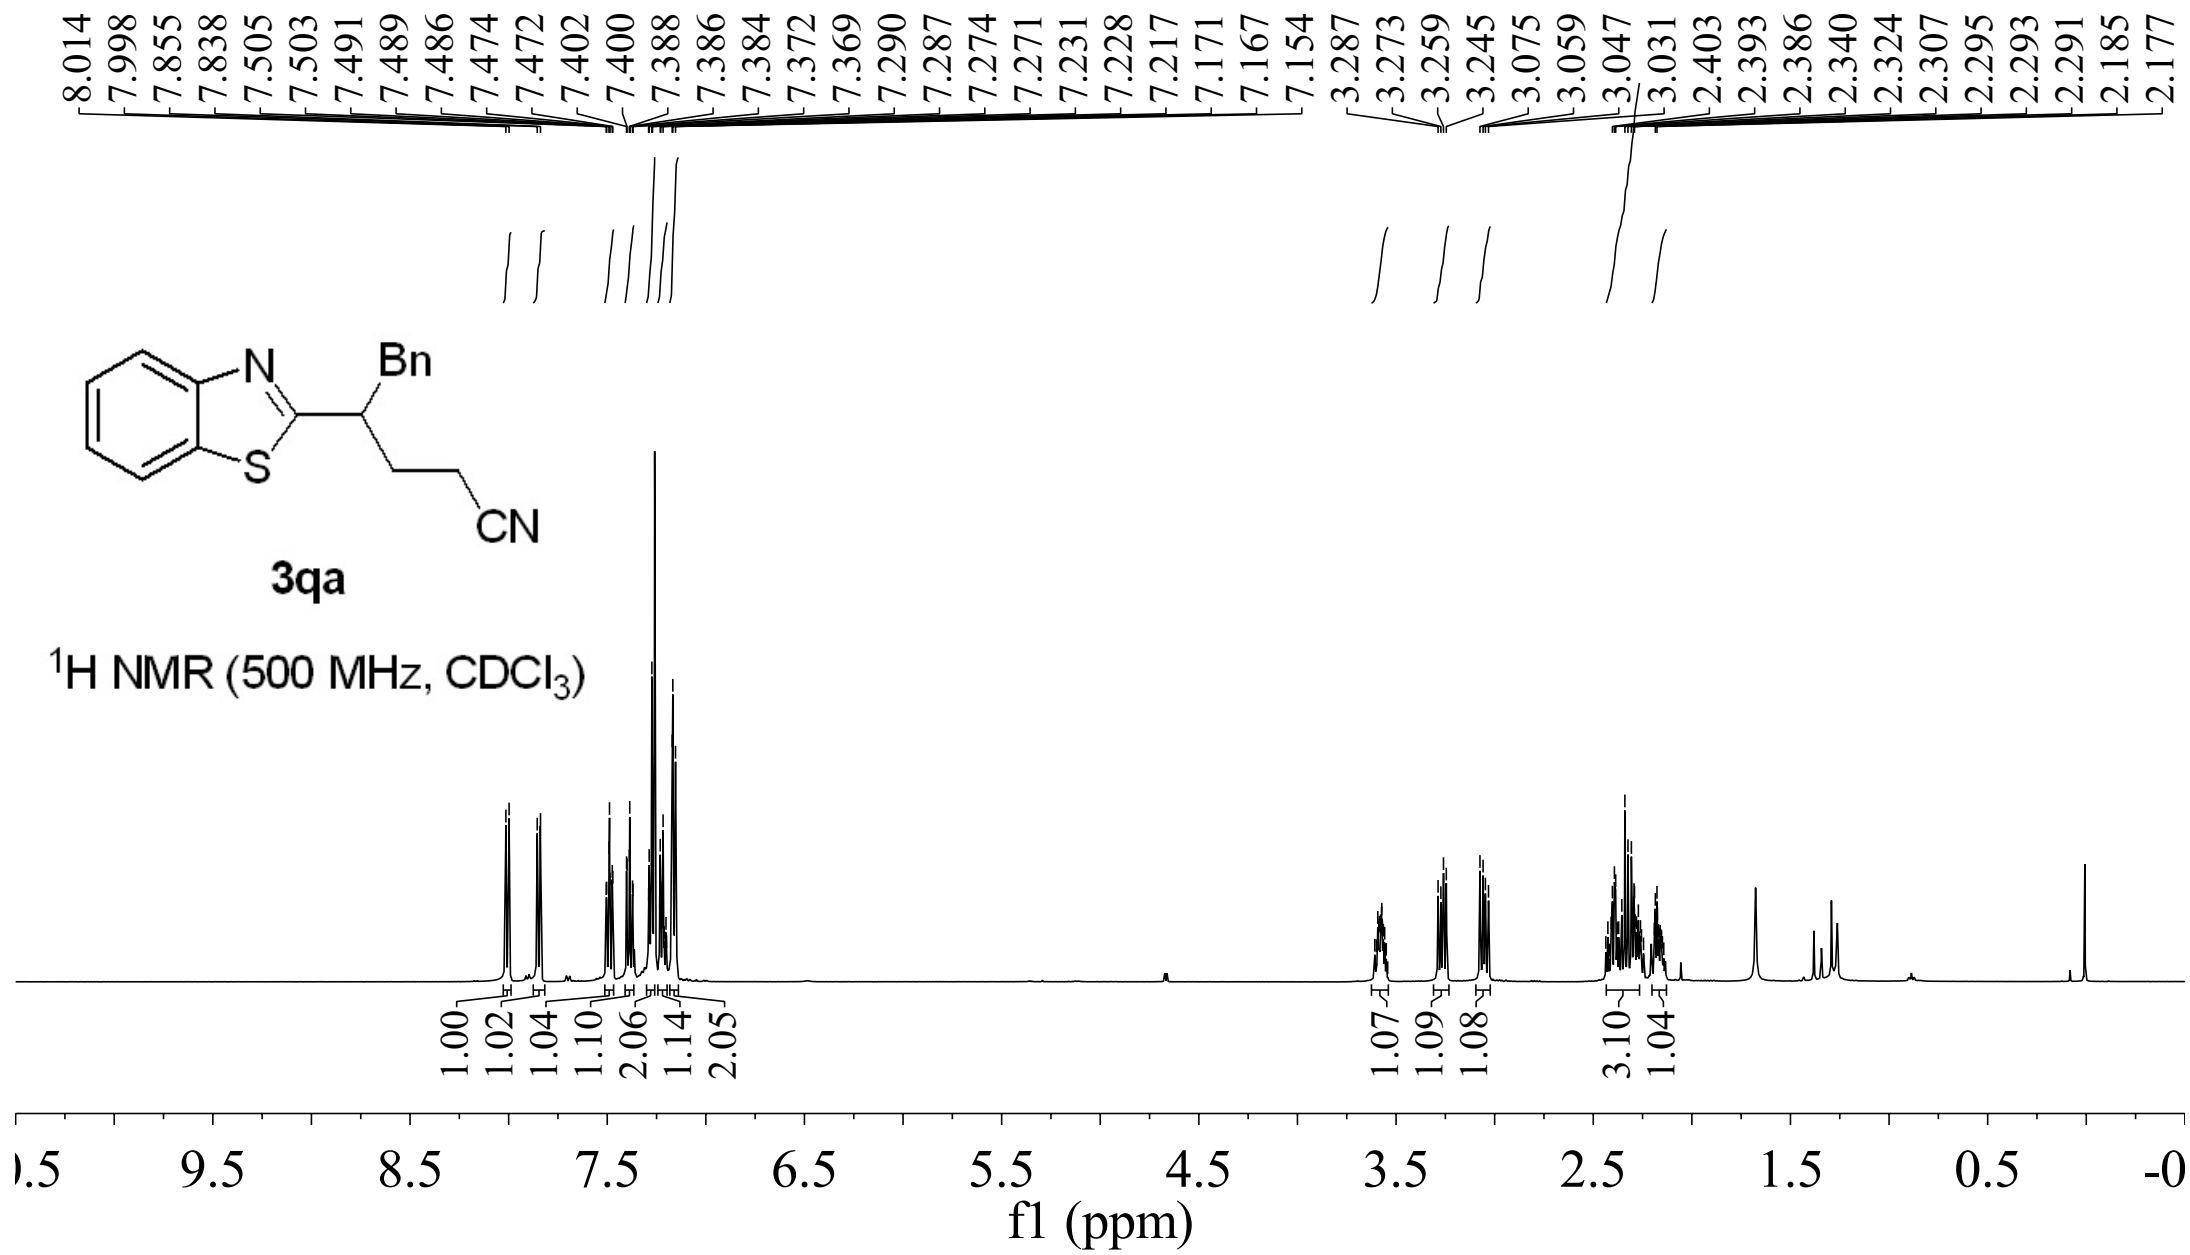

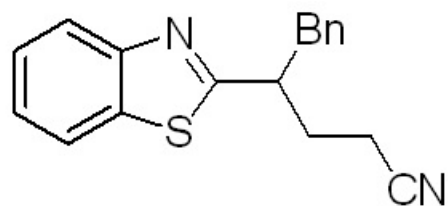

**3qa**

$^{13}\text{C}$  NMR (126 MHz,  $\text{CDCl}_3$ )

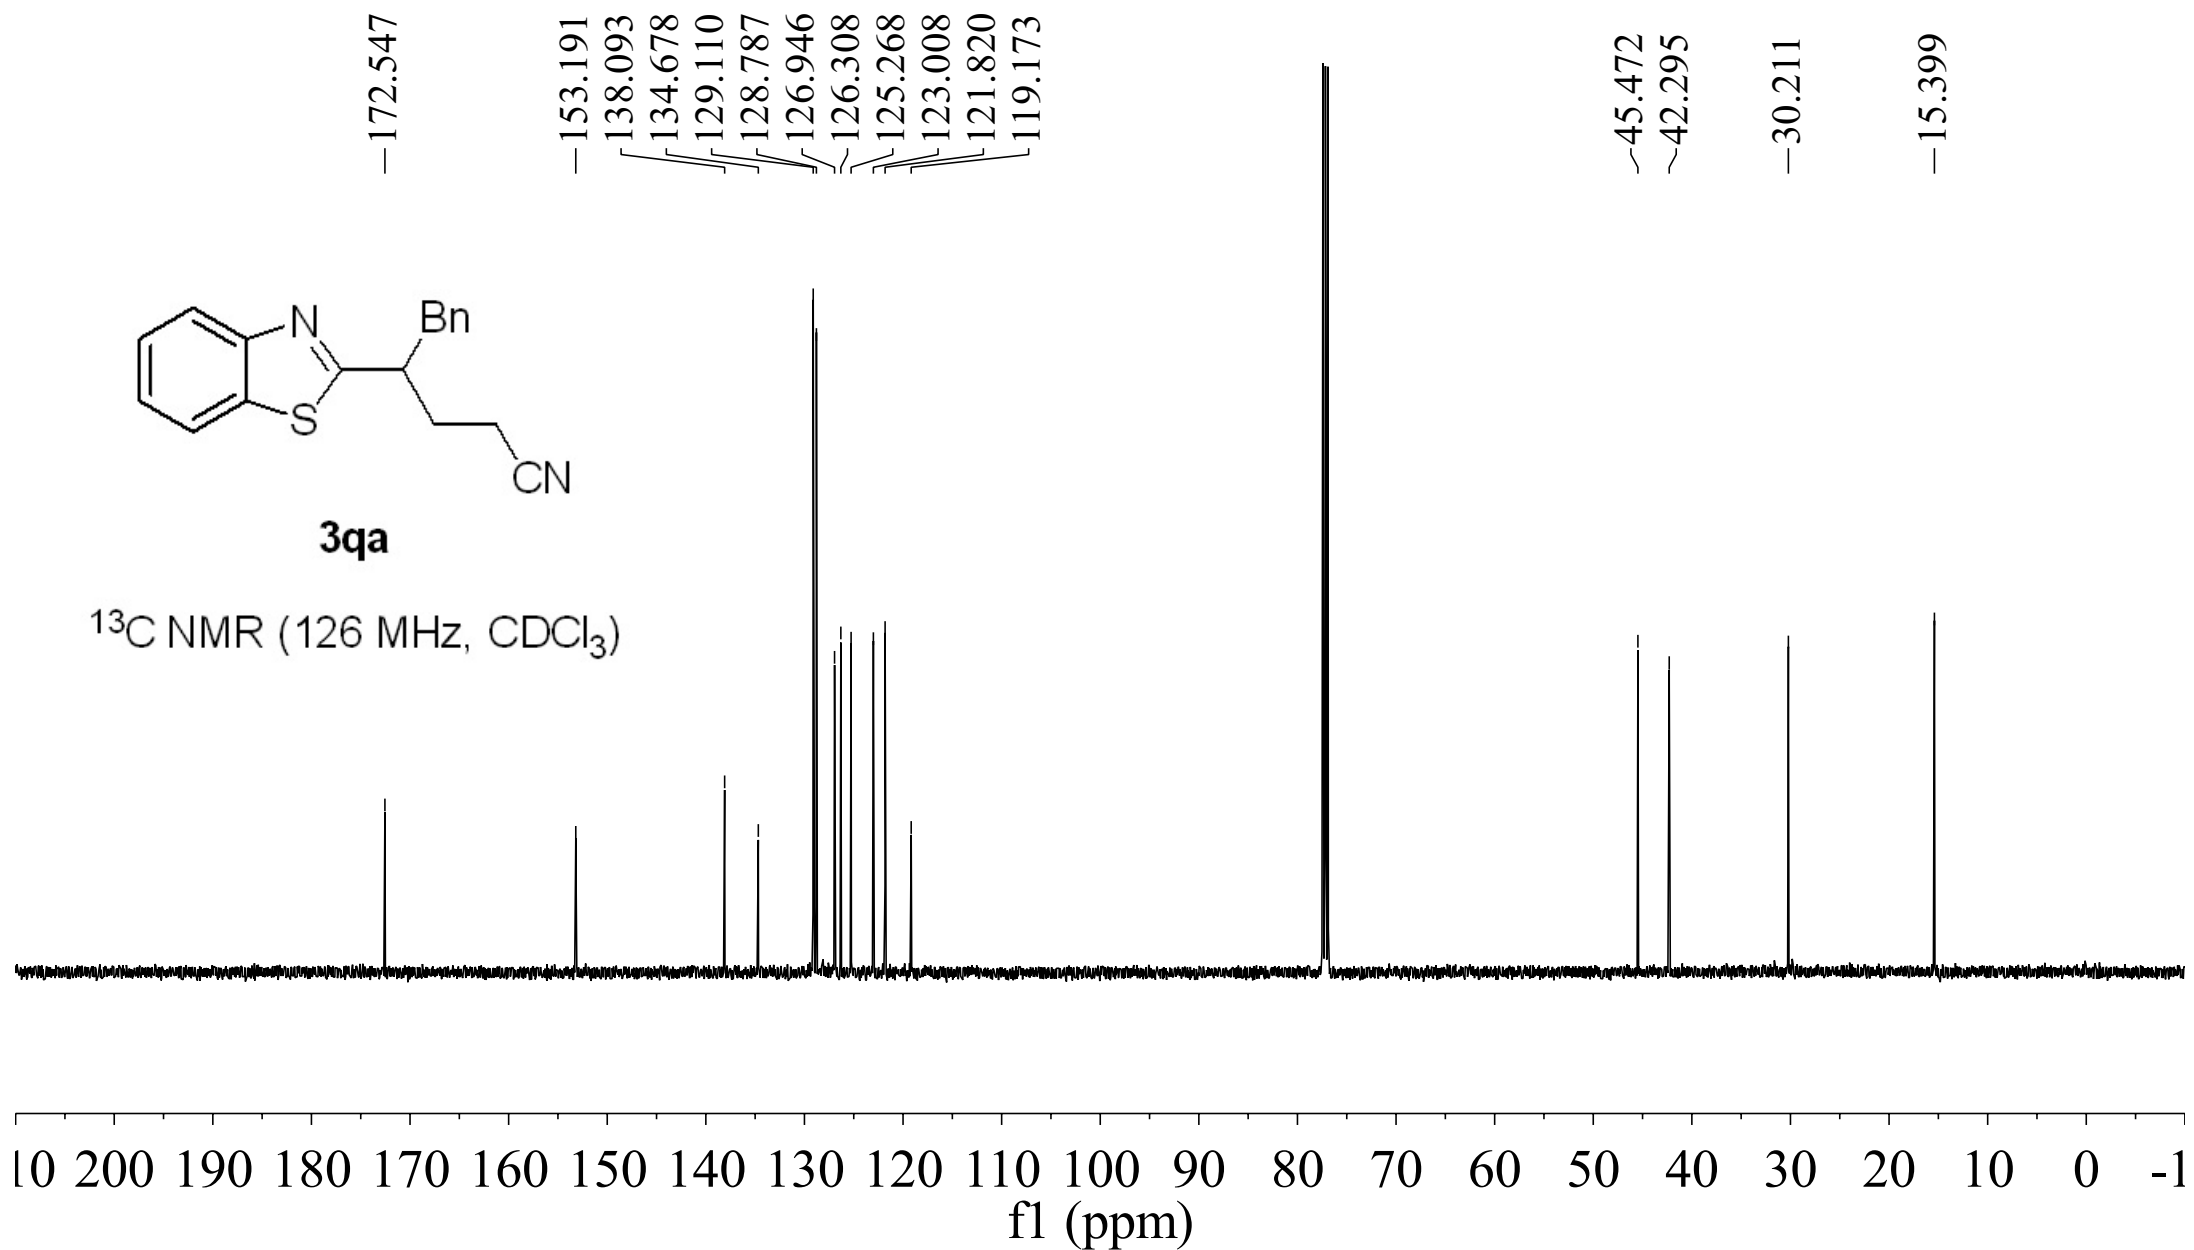

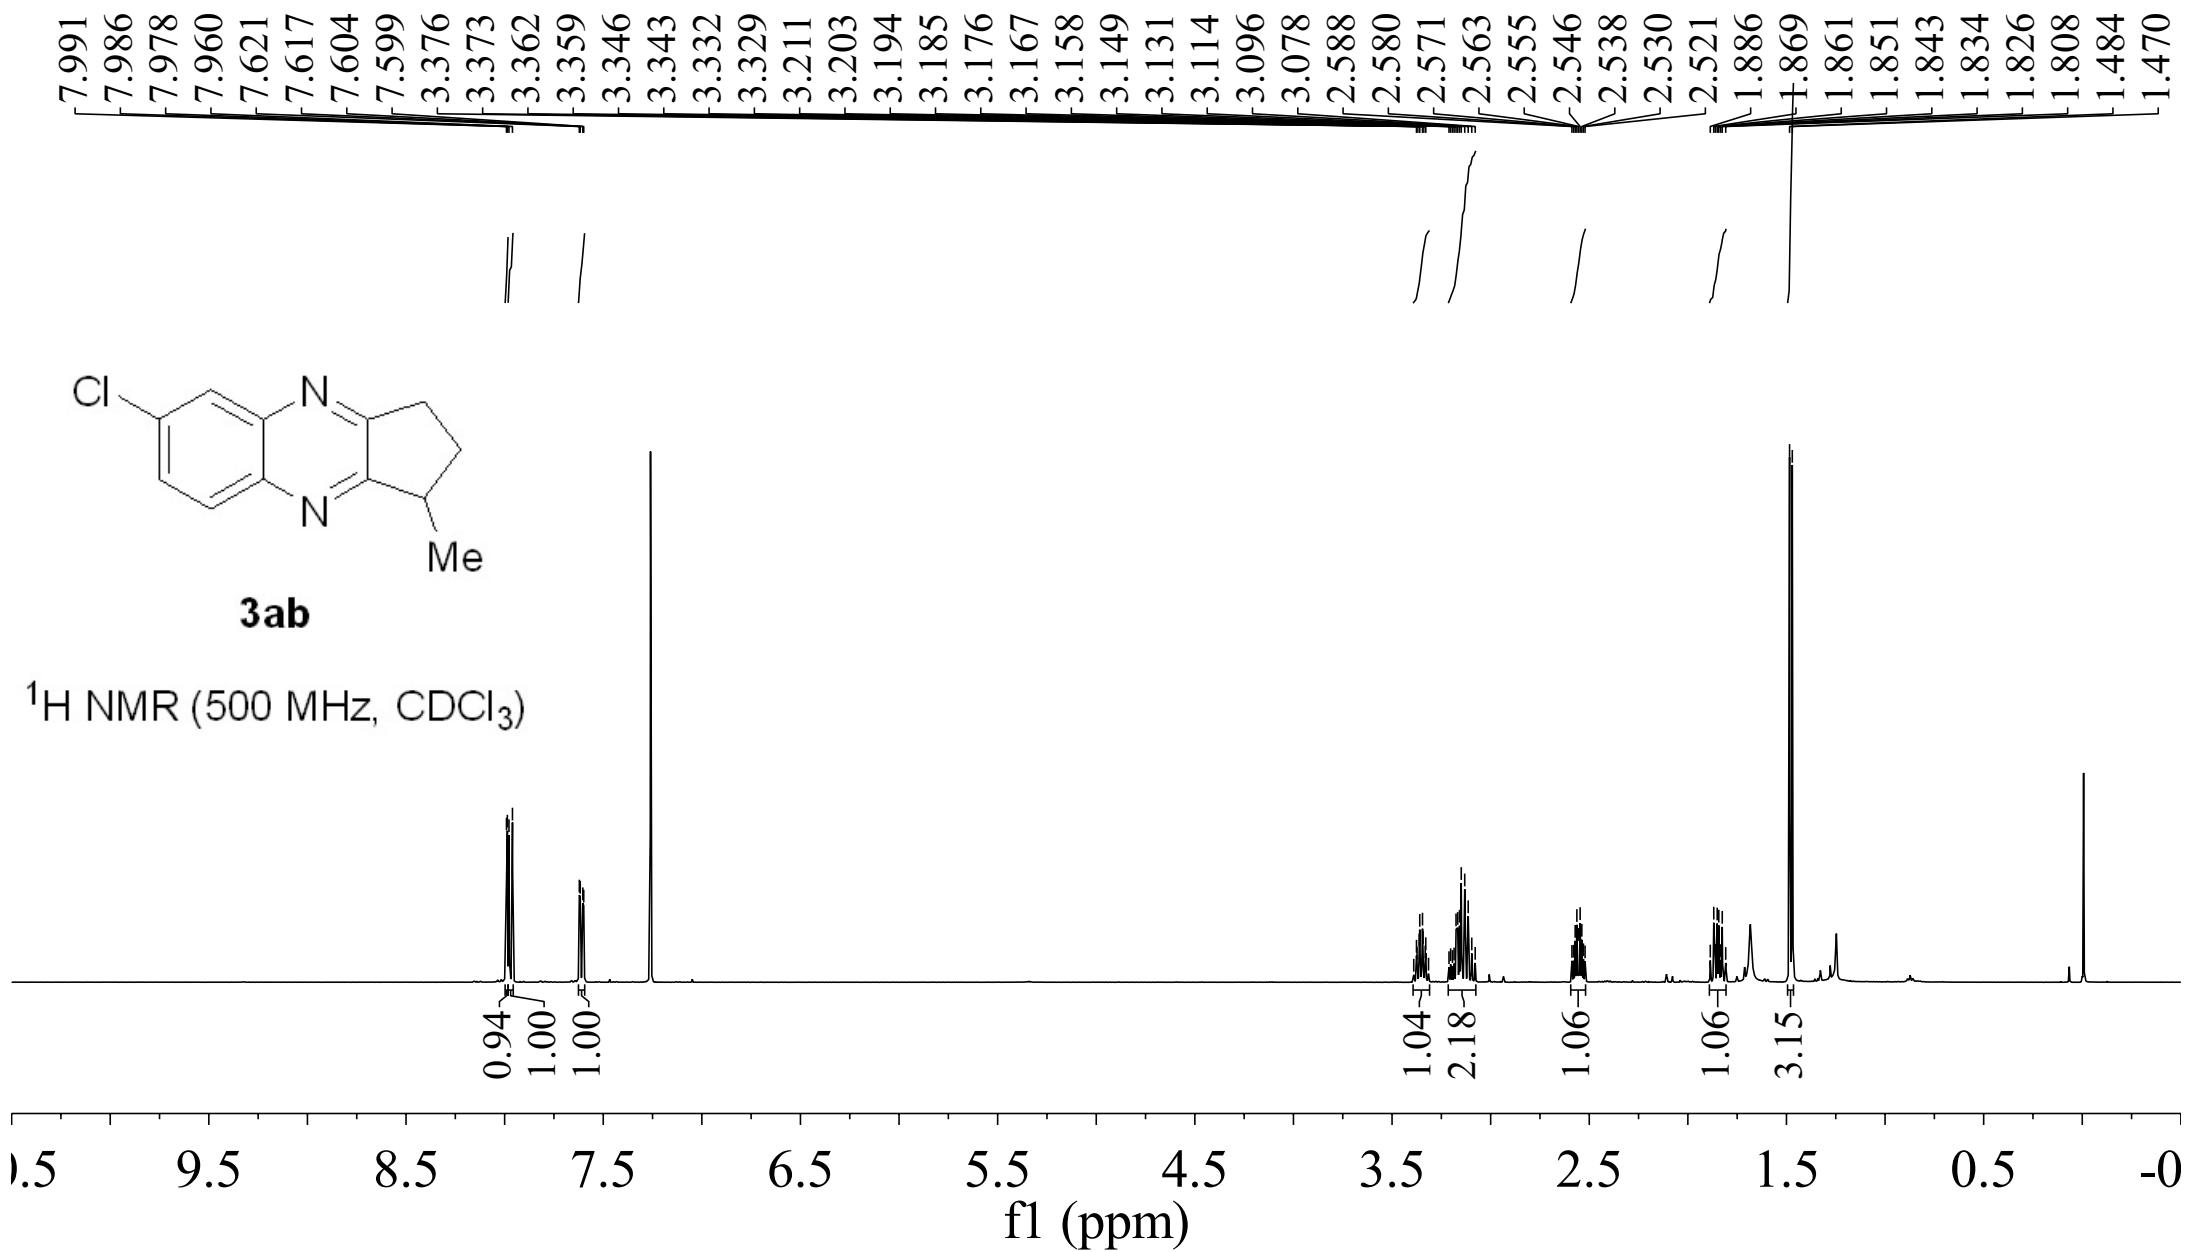



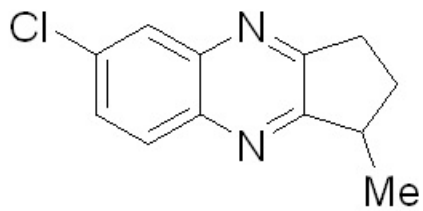

**3ab**

$^{13}\text{C}$  NMR (126 MHz,  $\text{CDCl}_3$ )

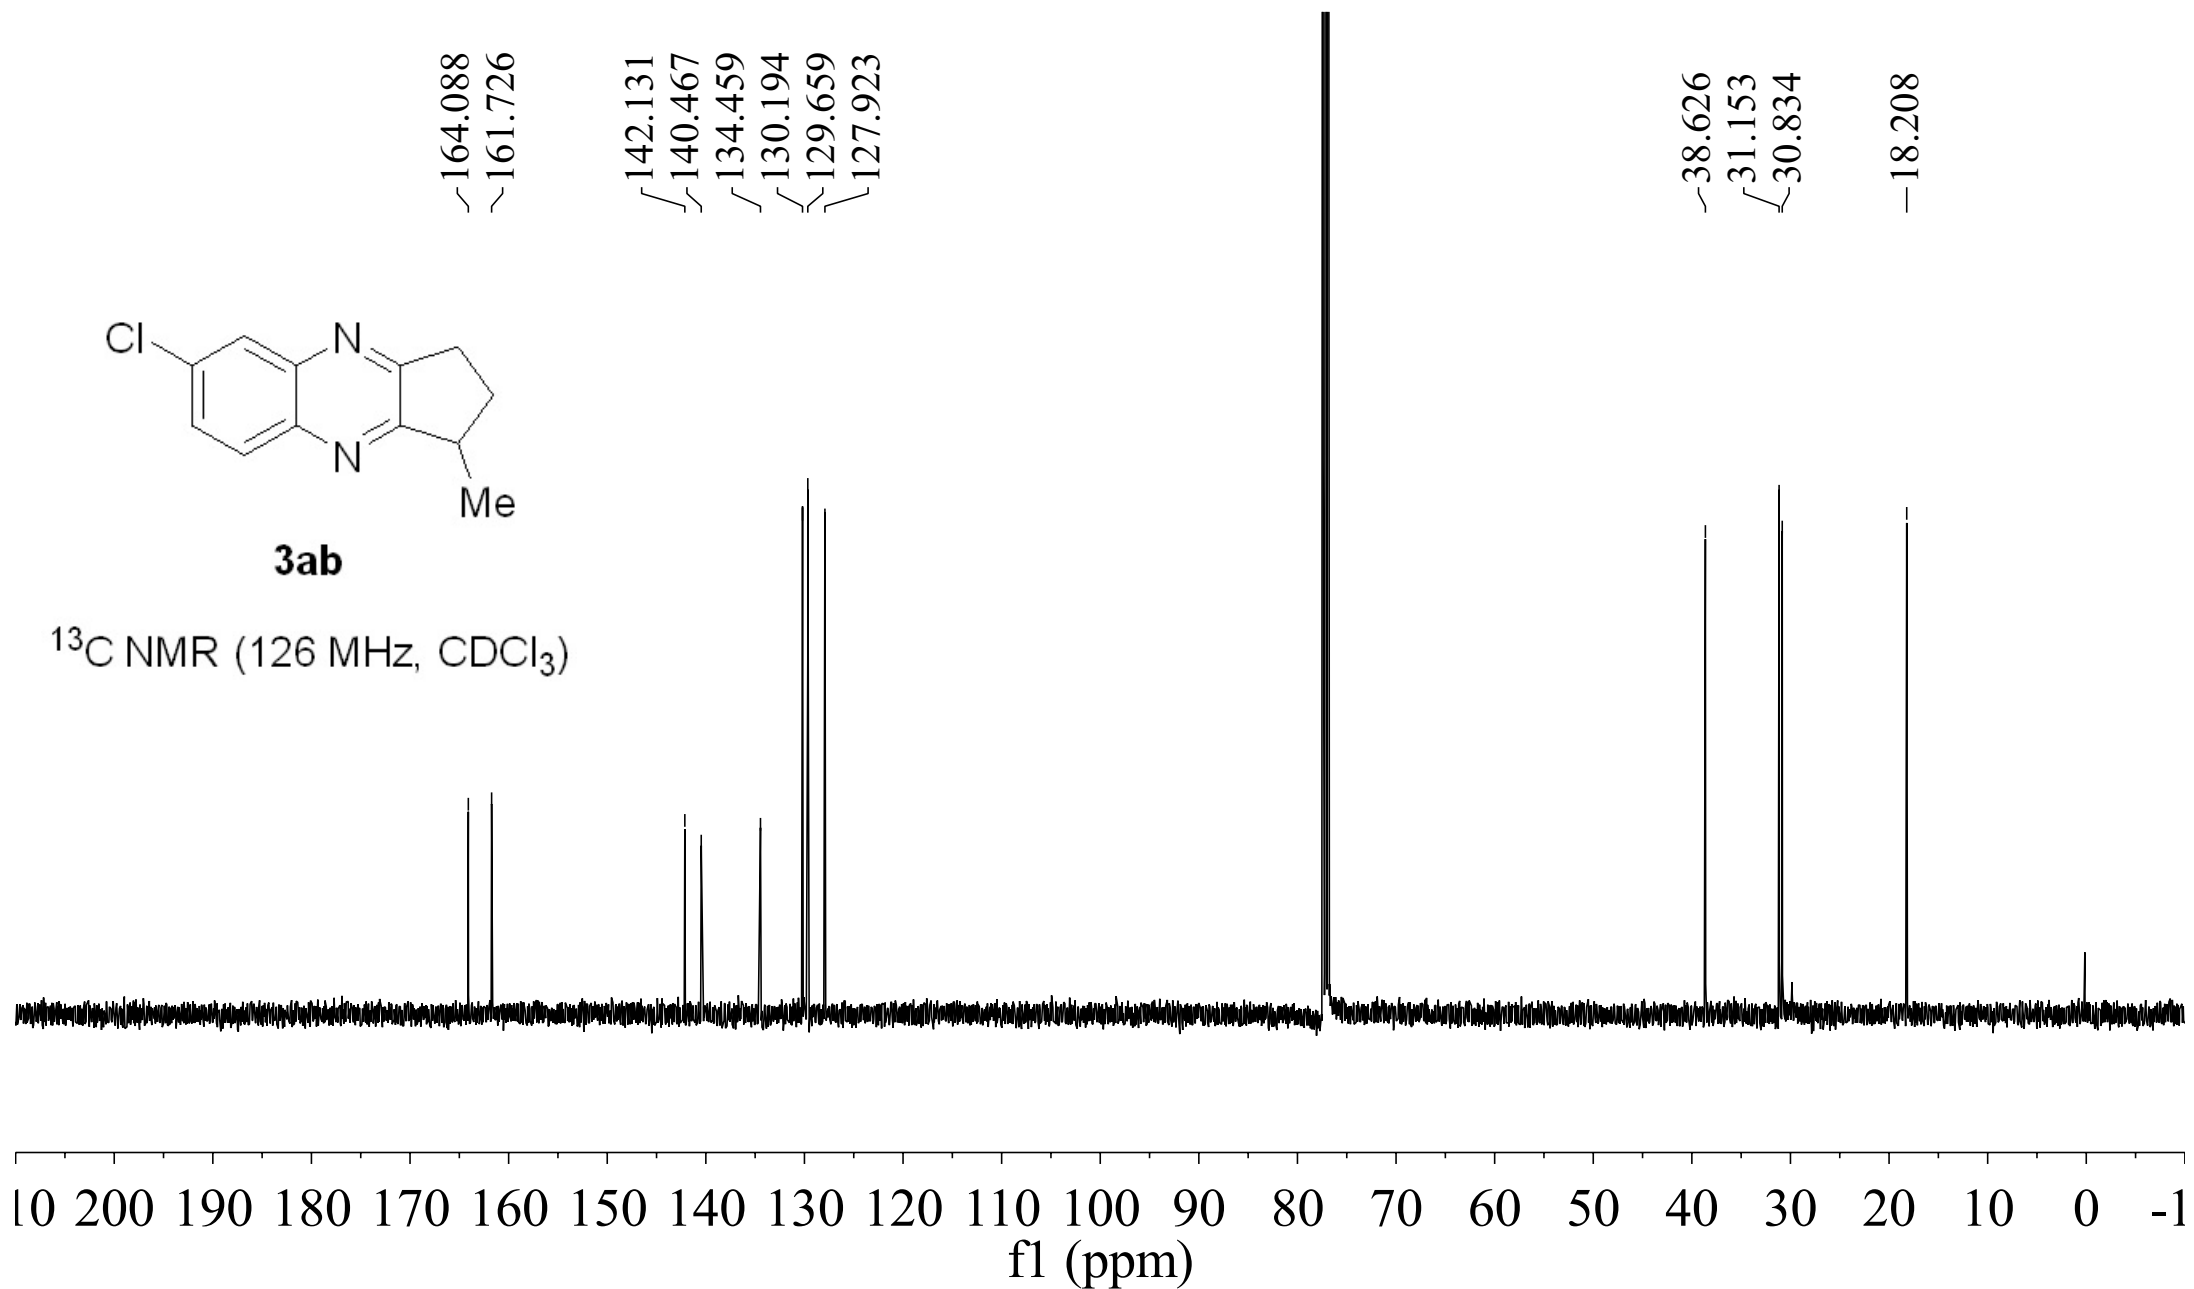

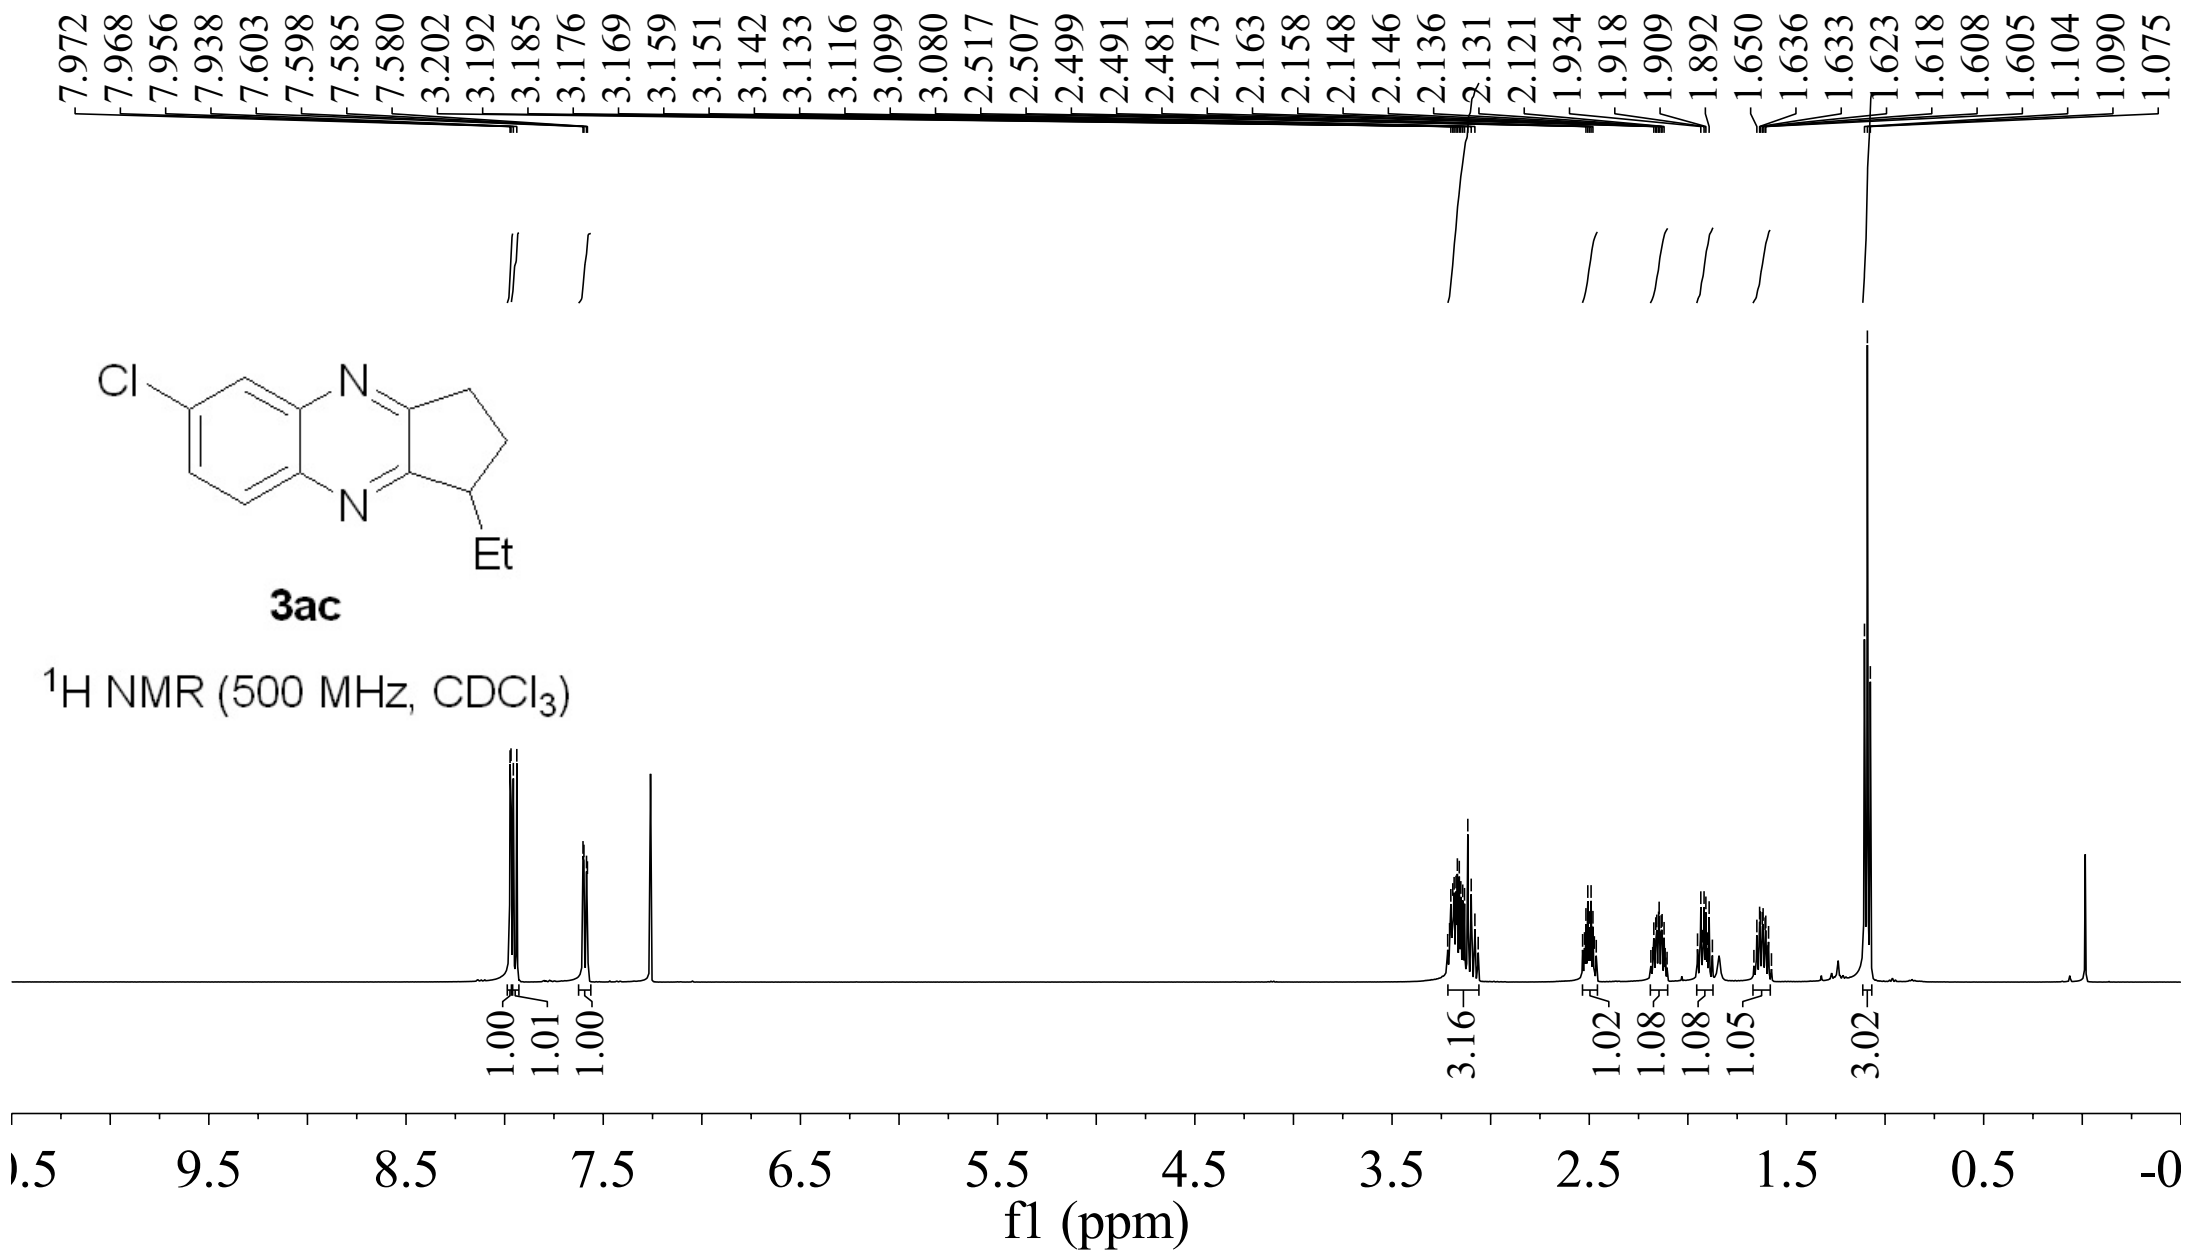

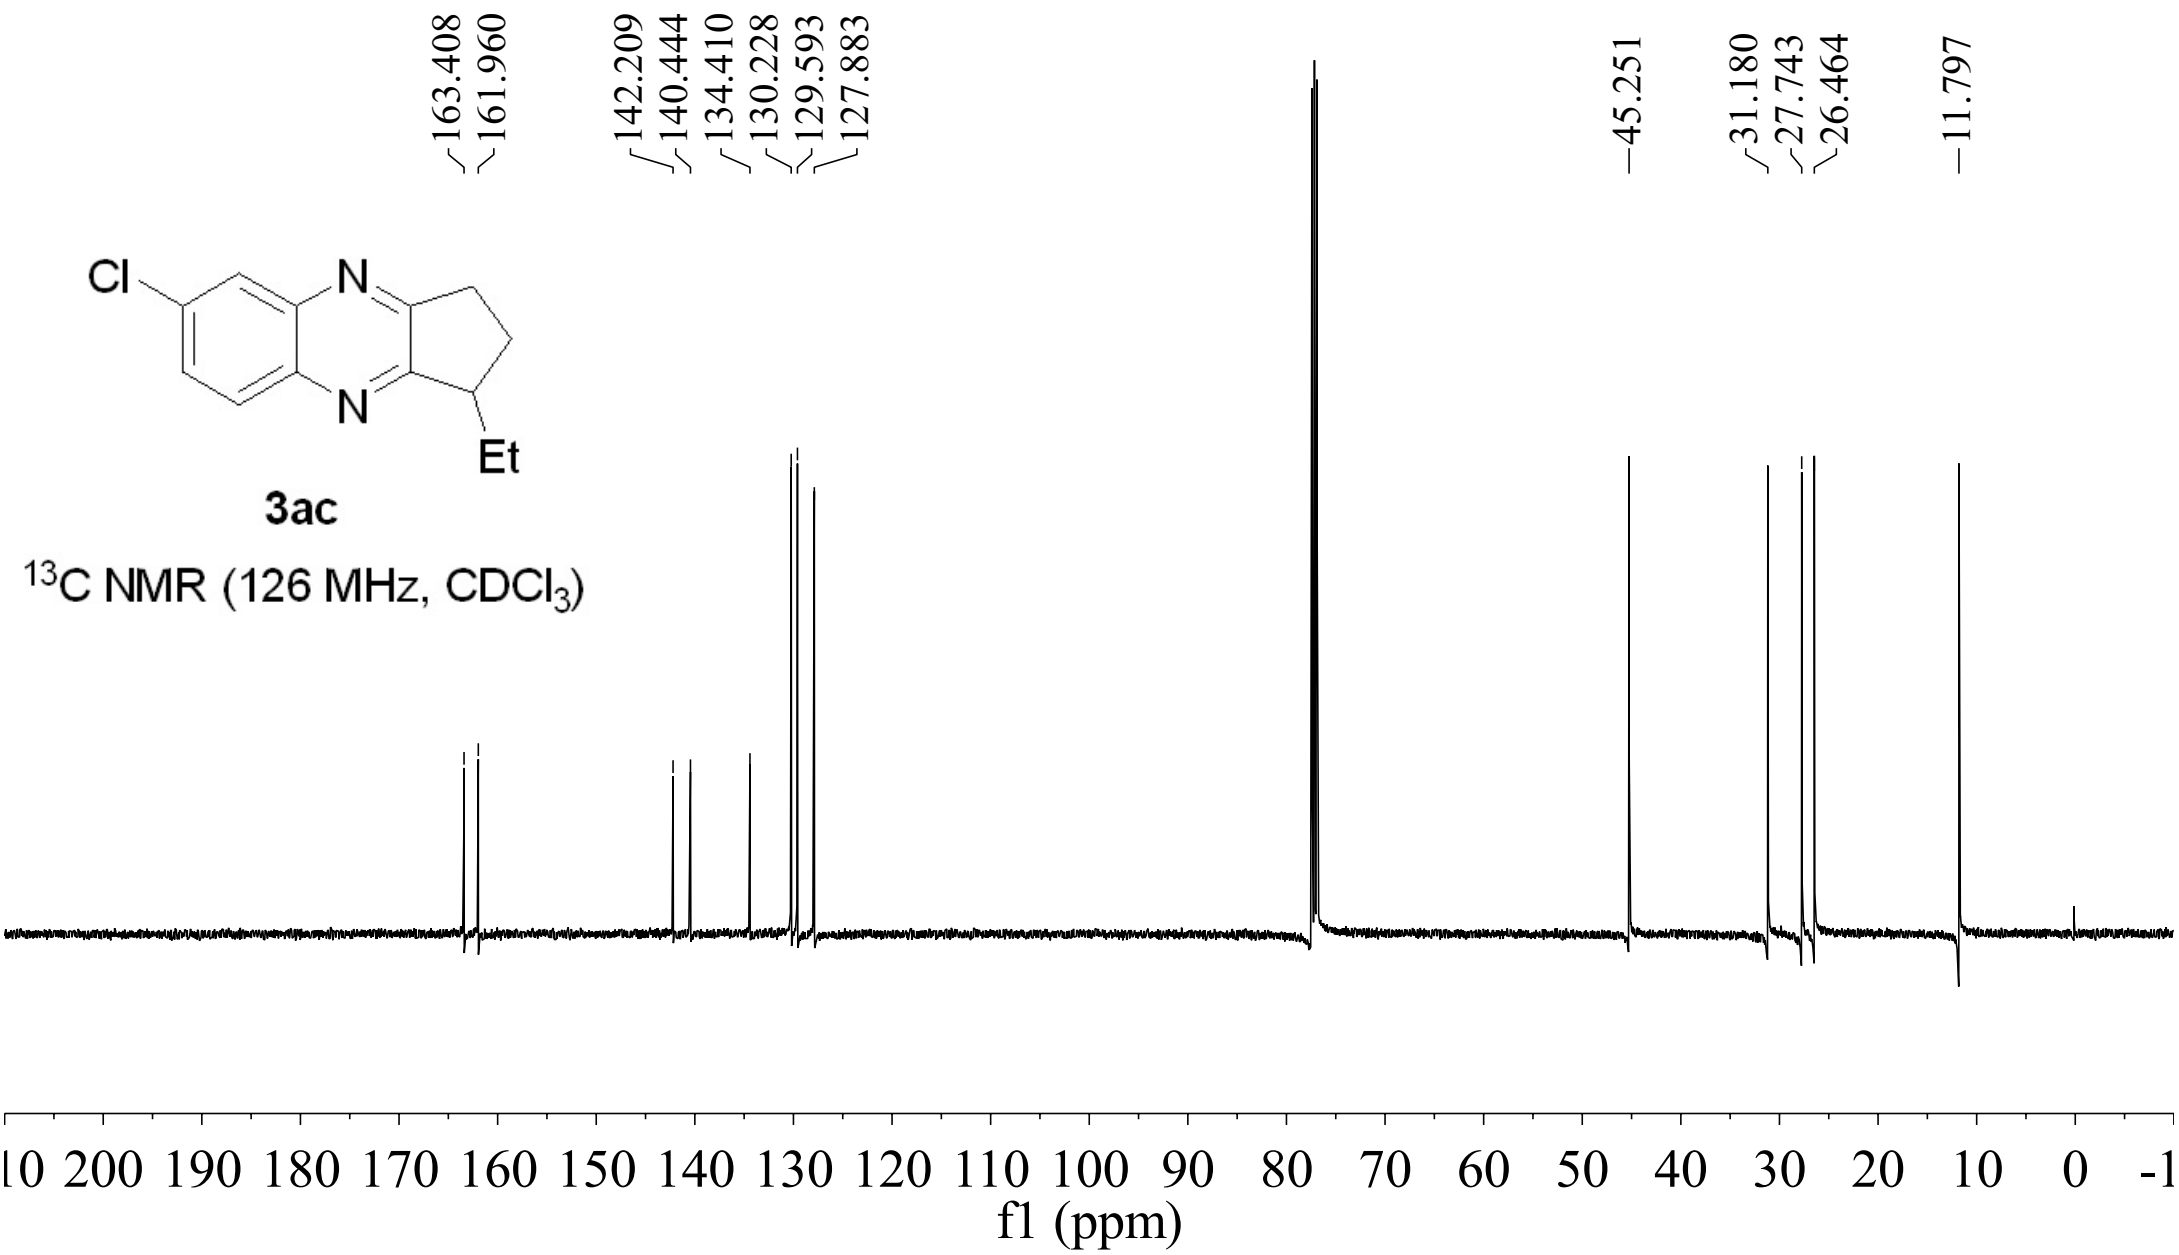

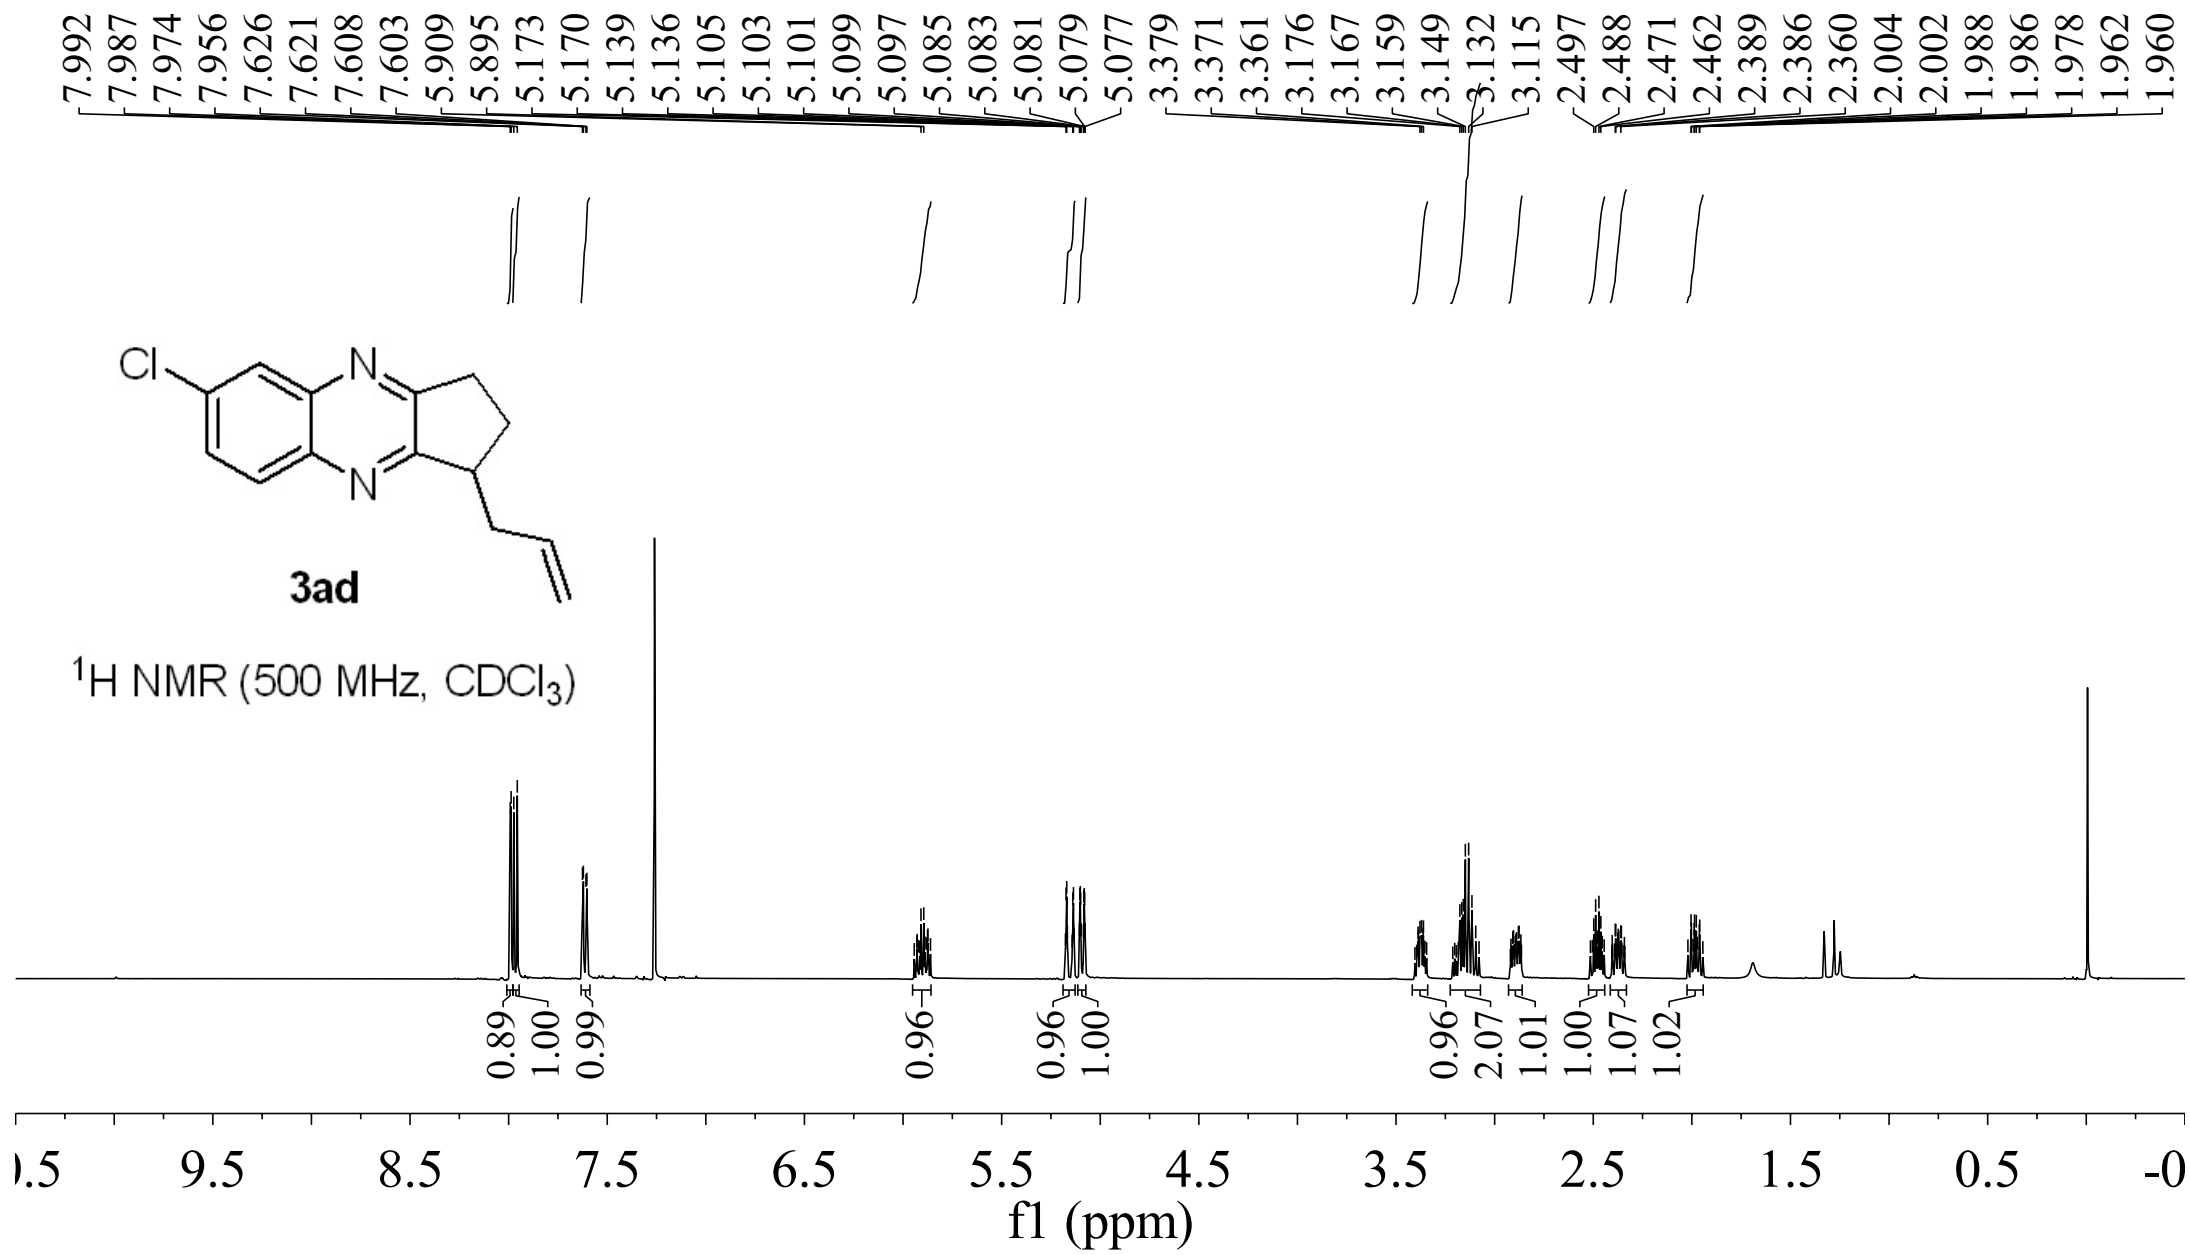

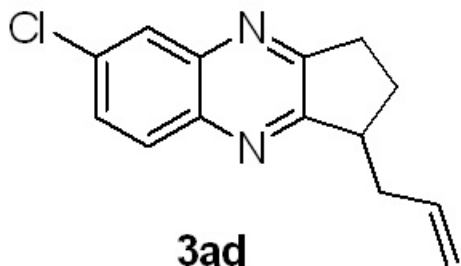

$^{13}\text{C}$  NMR (126 MHz,  $\text{CDCl}_3$ )

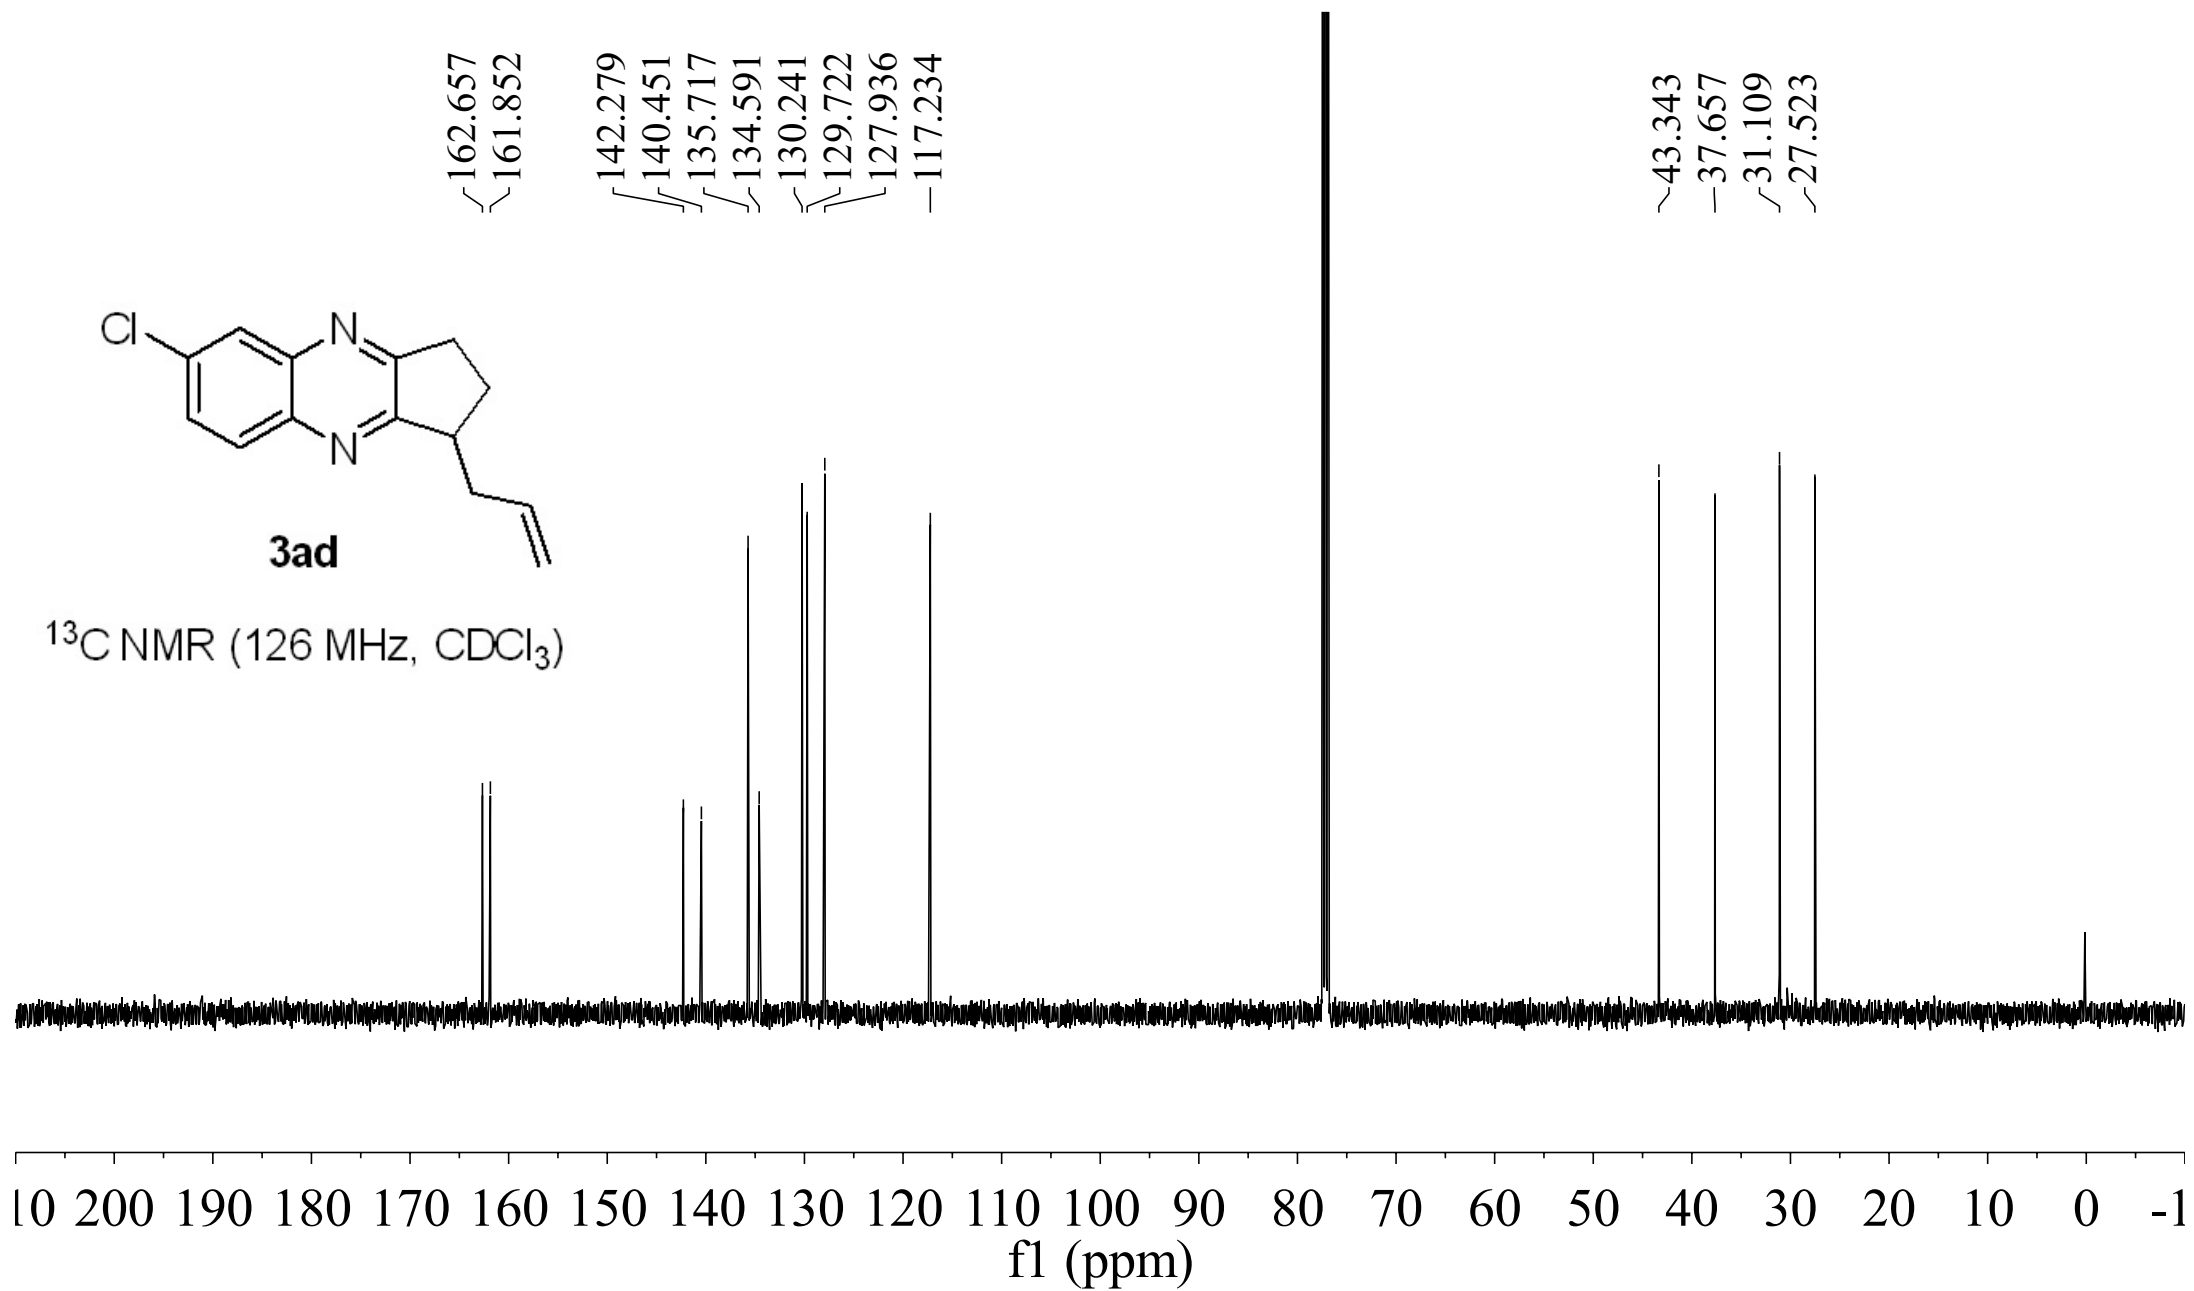

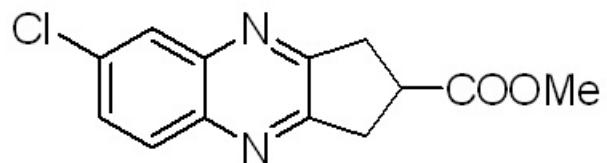

**3ae**

<sup>1</sup>H NMR (500 MHz, CDCl<sub>3</sub>)

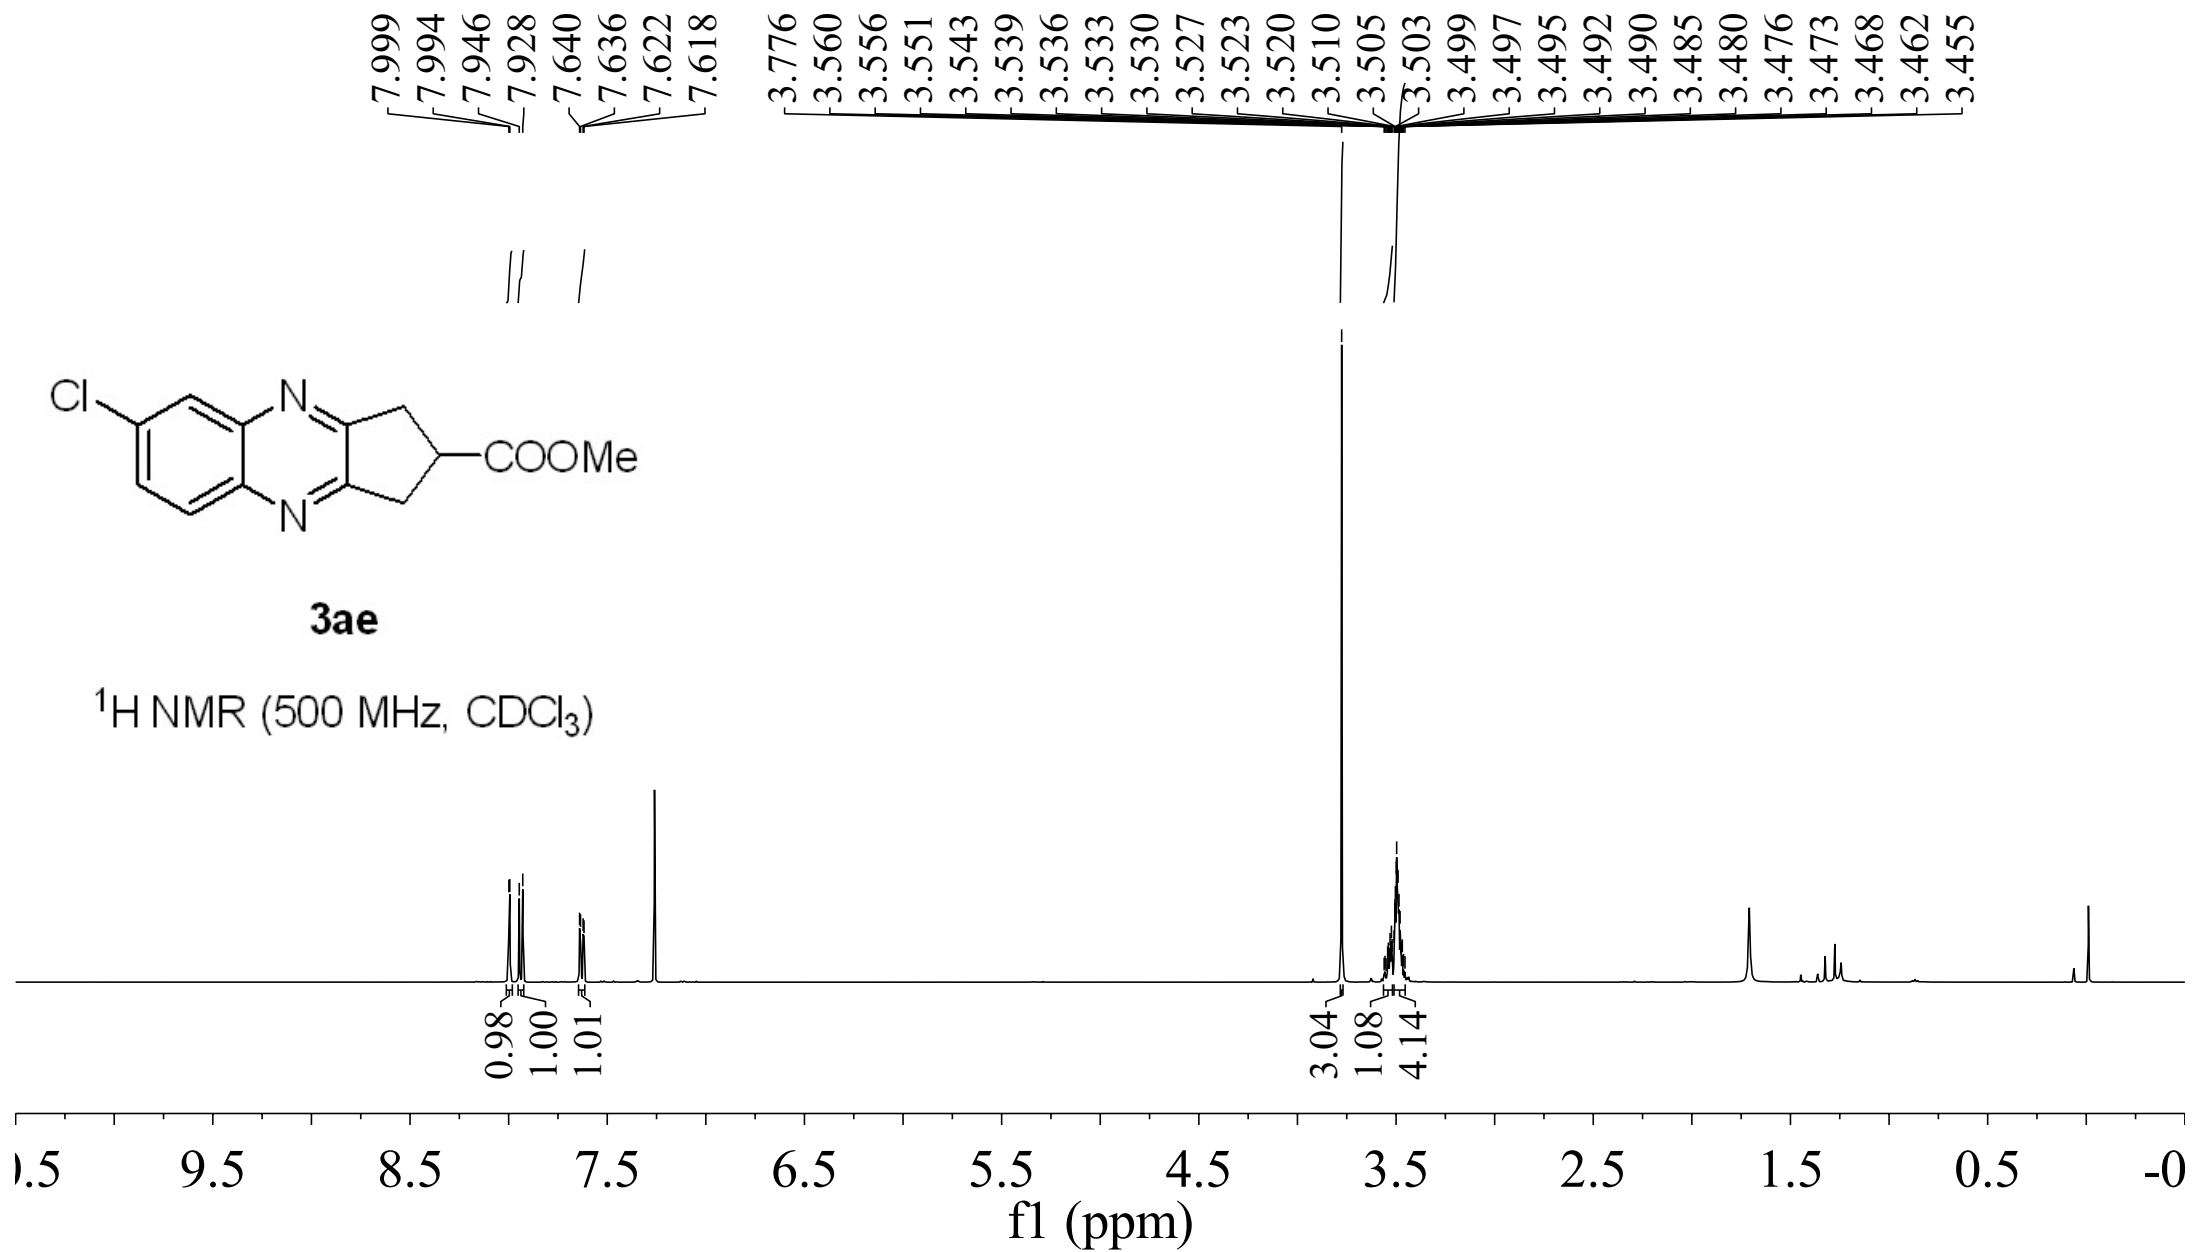

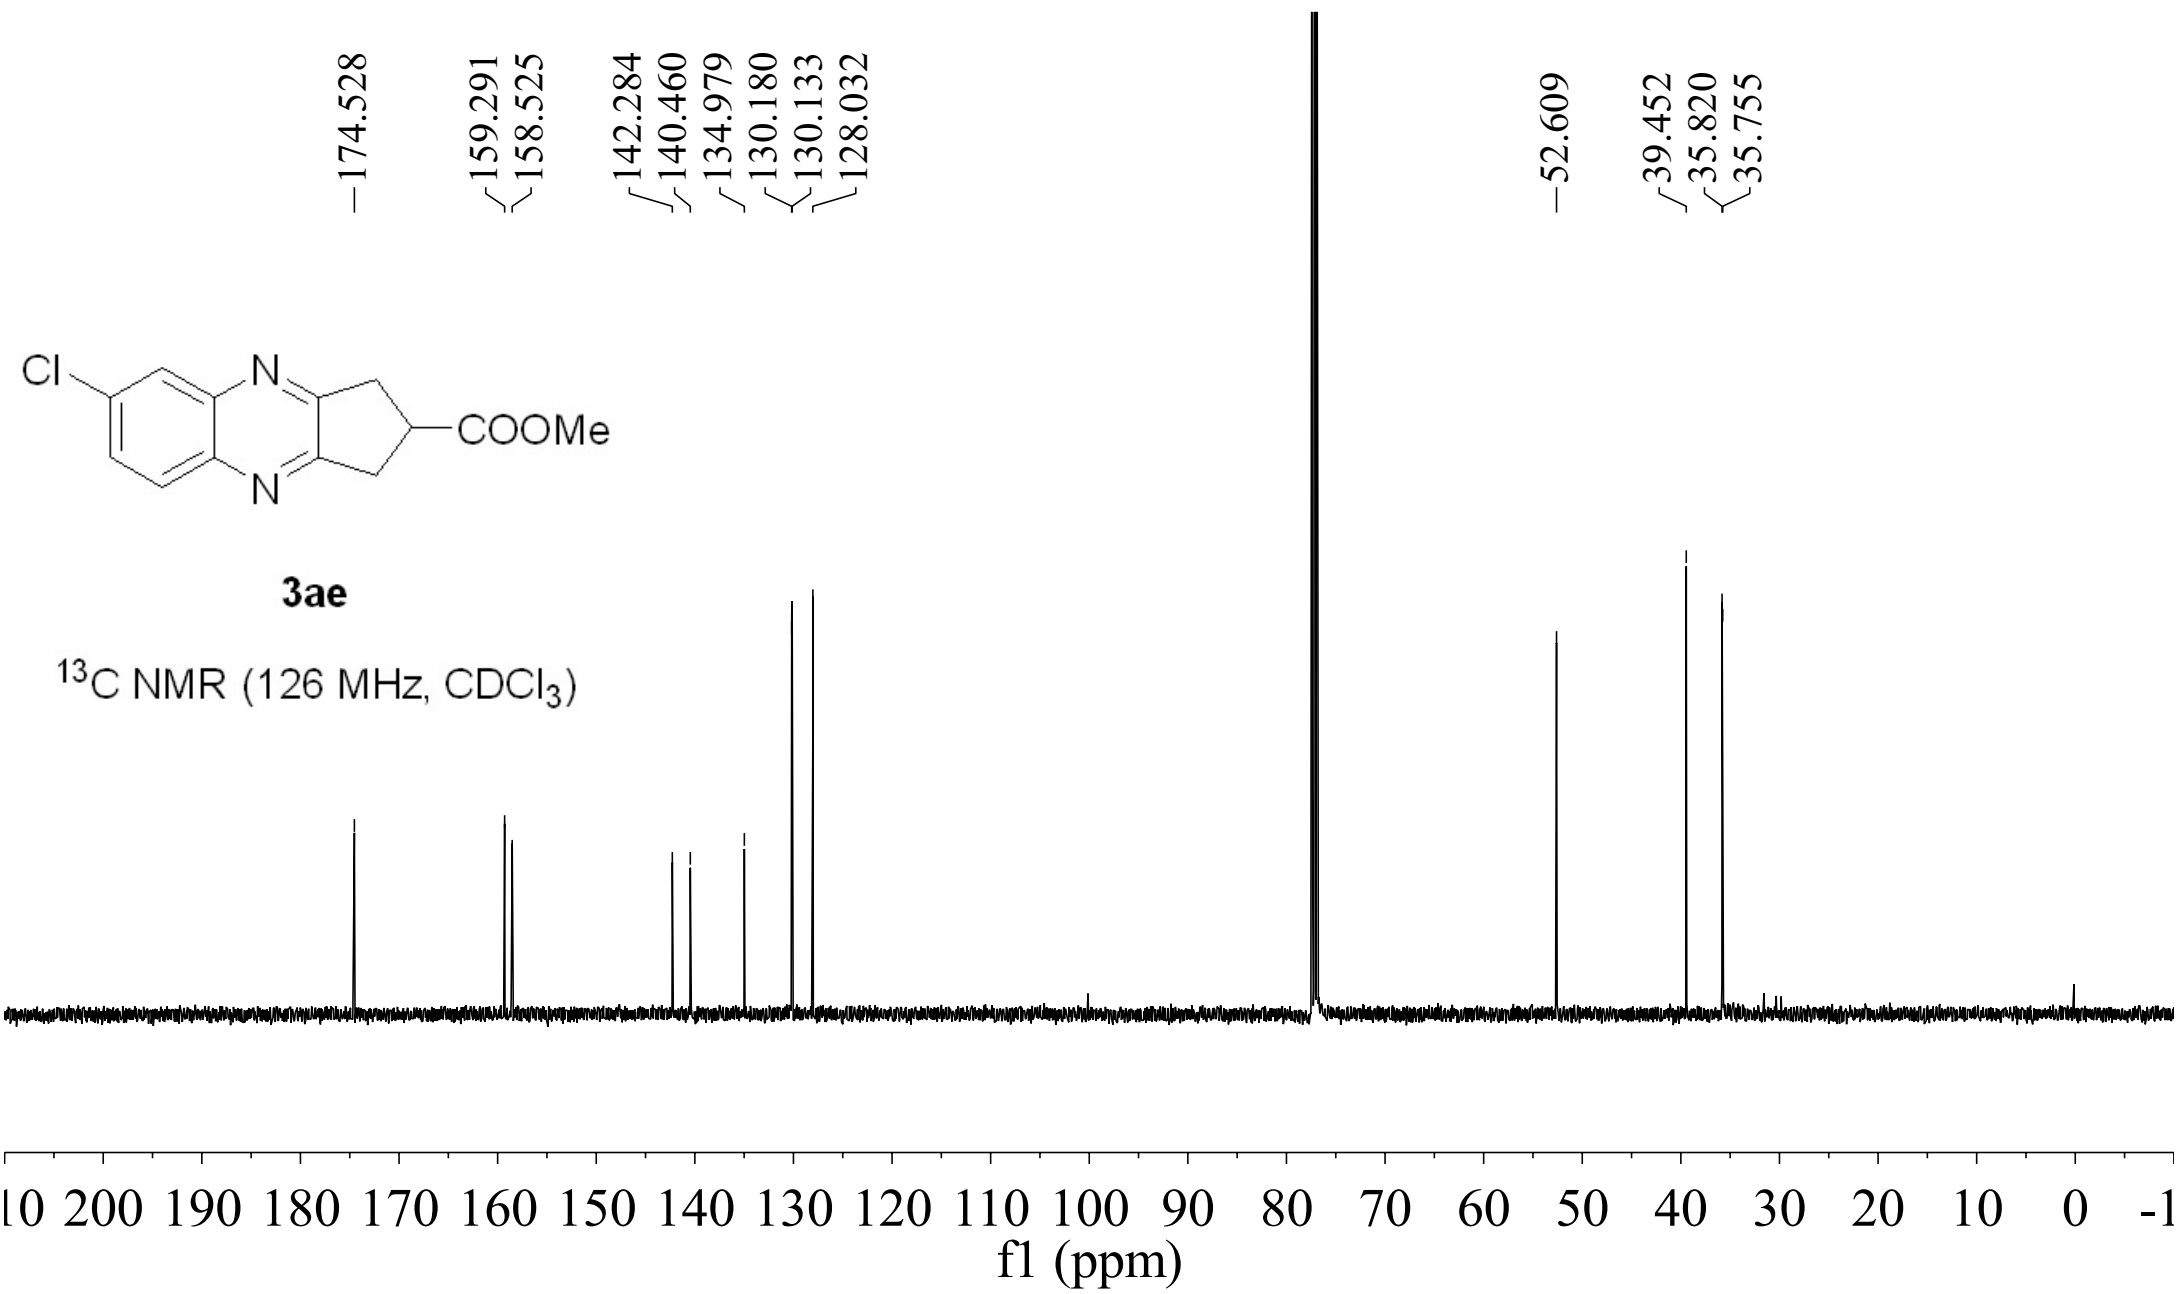

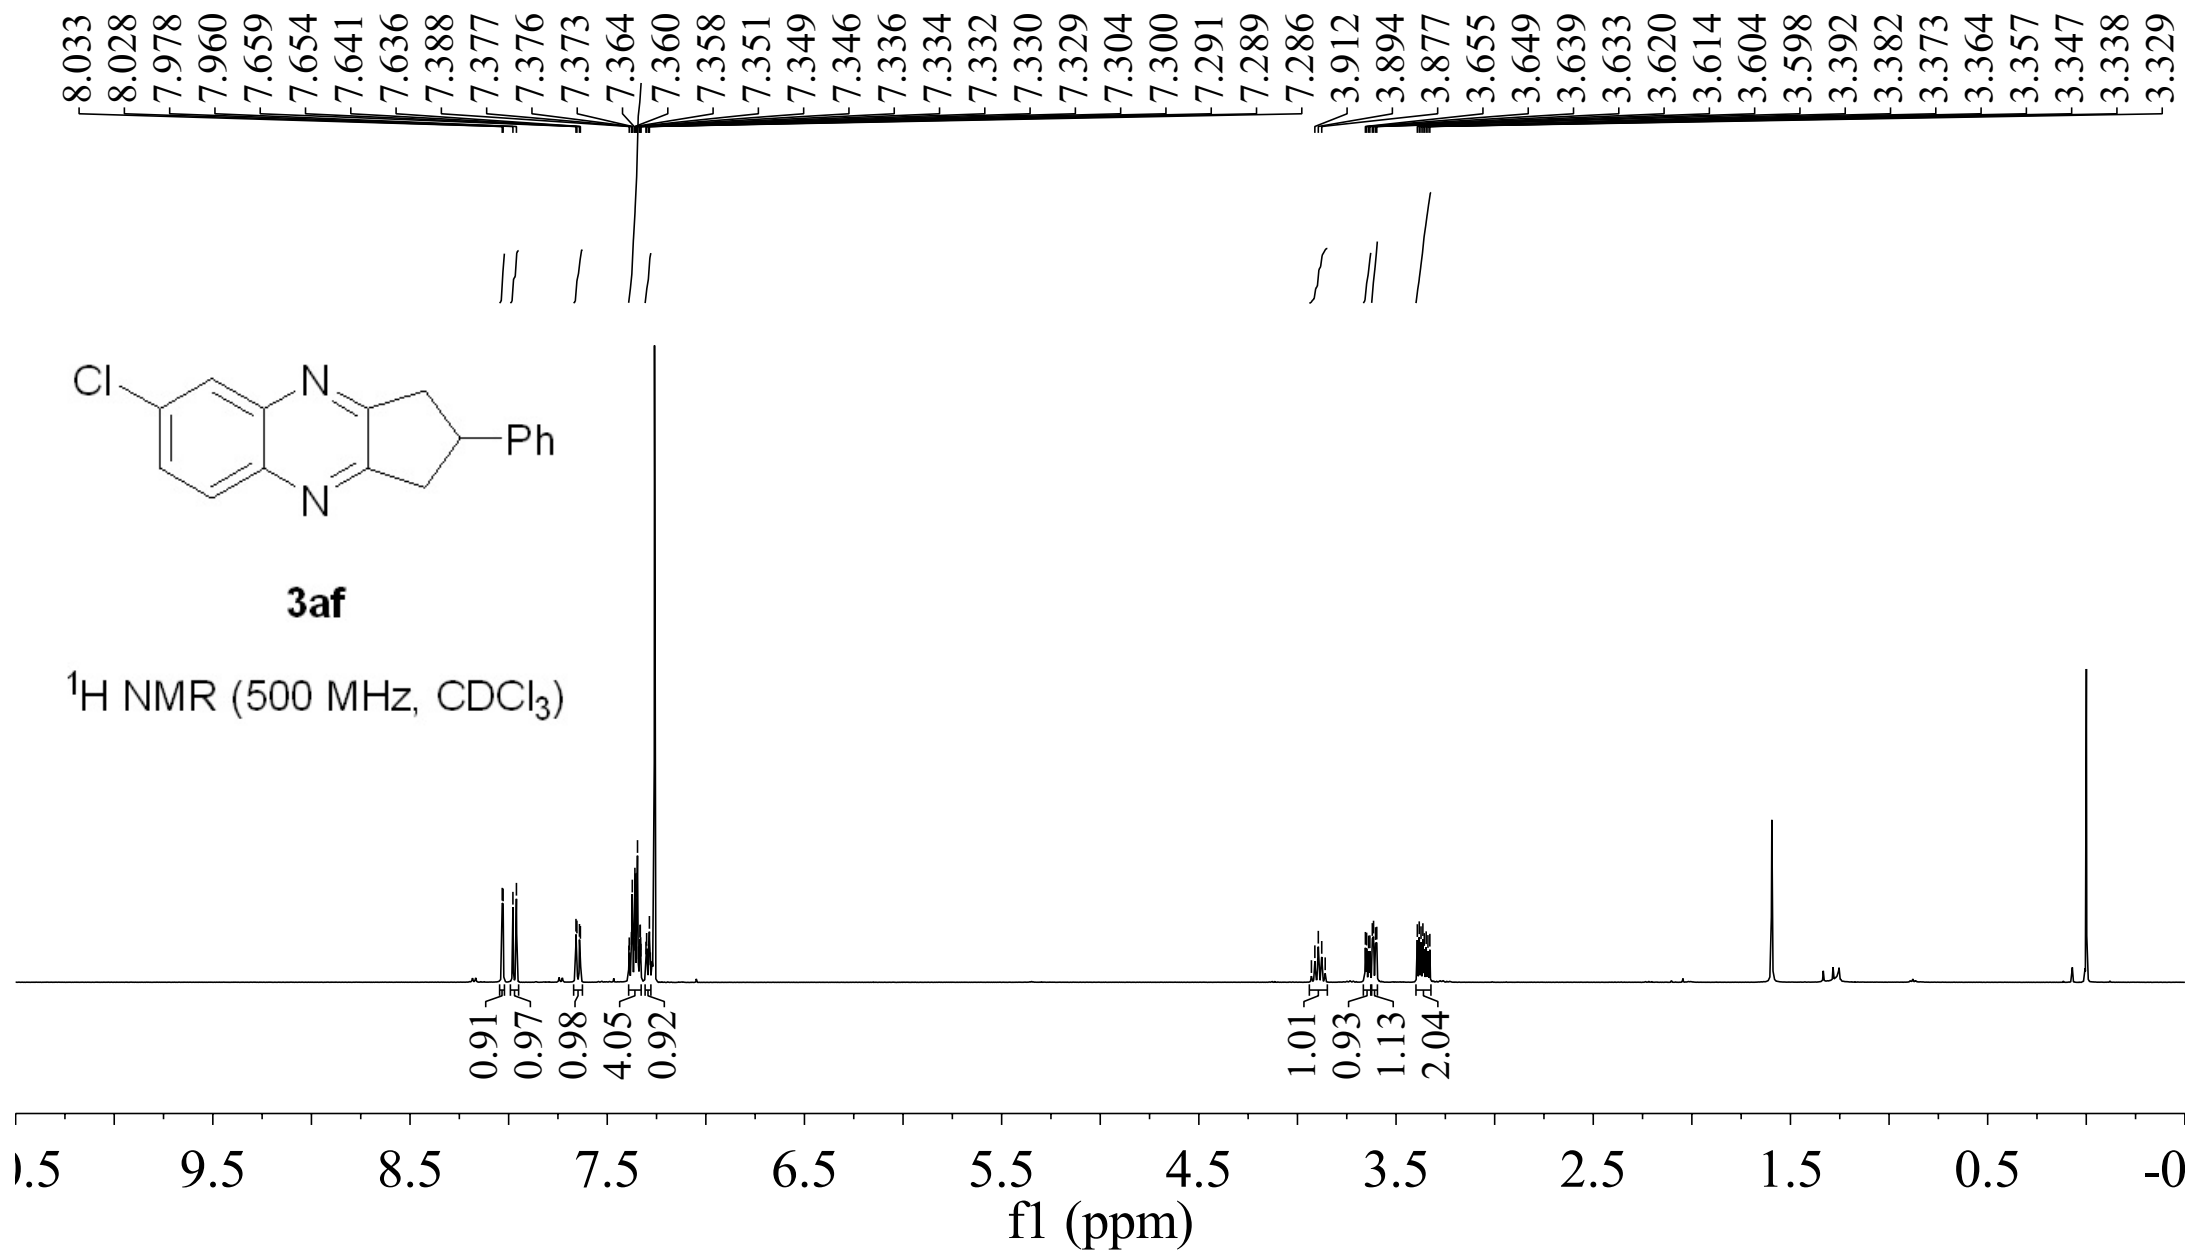



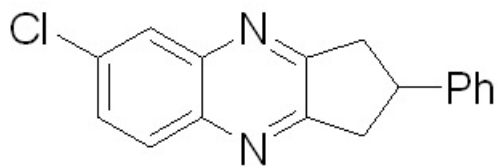

**3af**

$^{13}\text{C}$  NMR (126 MHz,  $\text{CDCl}_3$ )

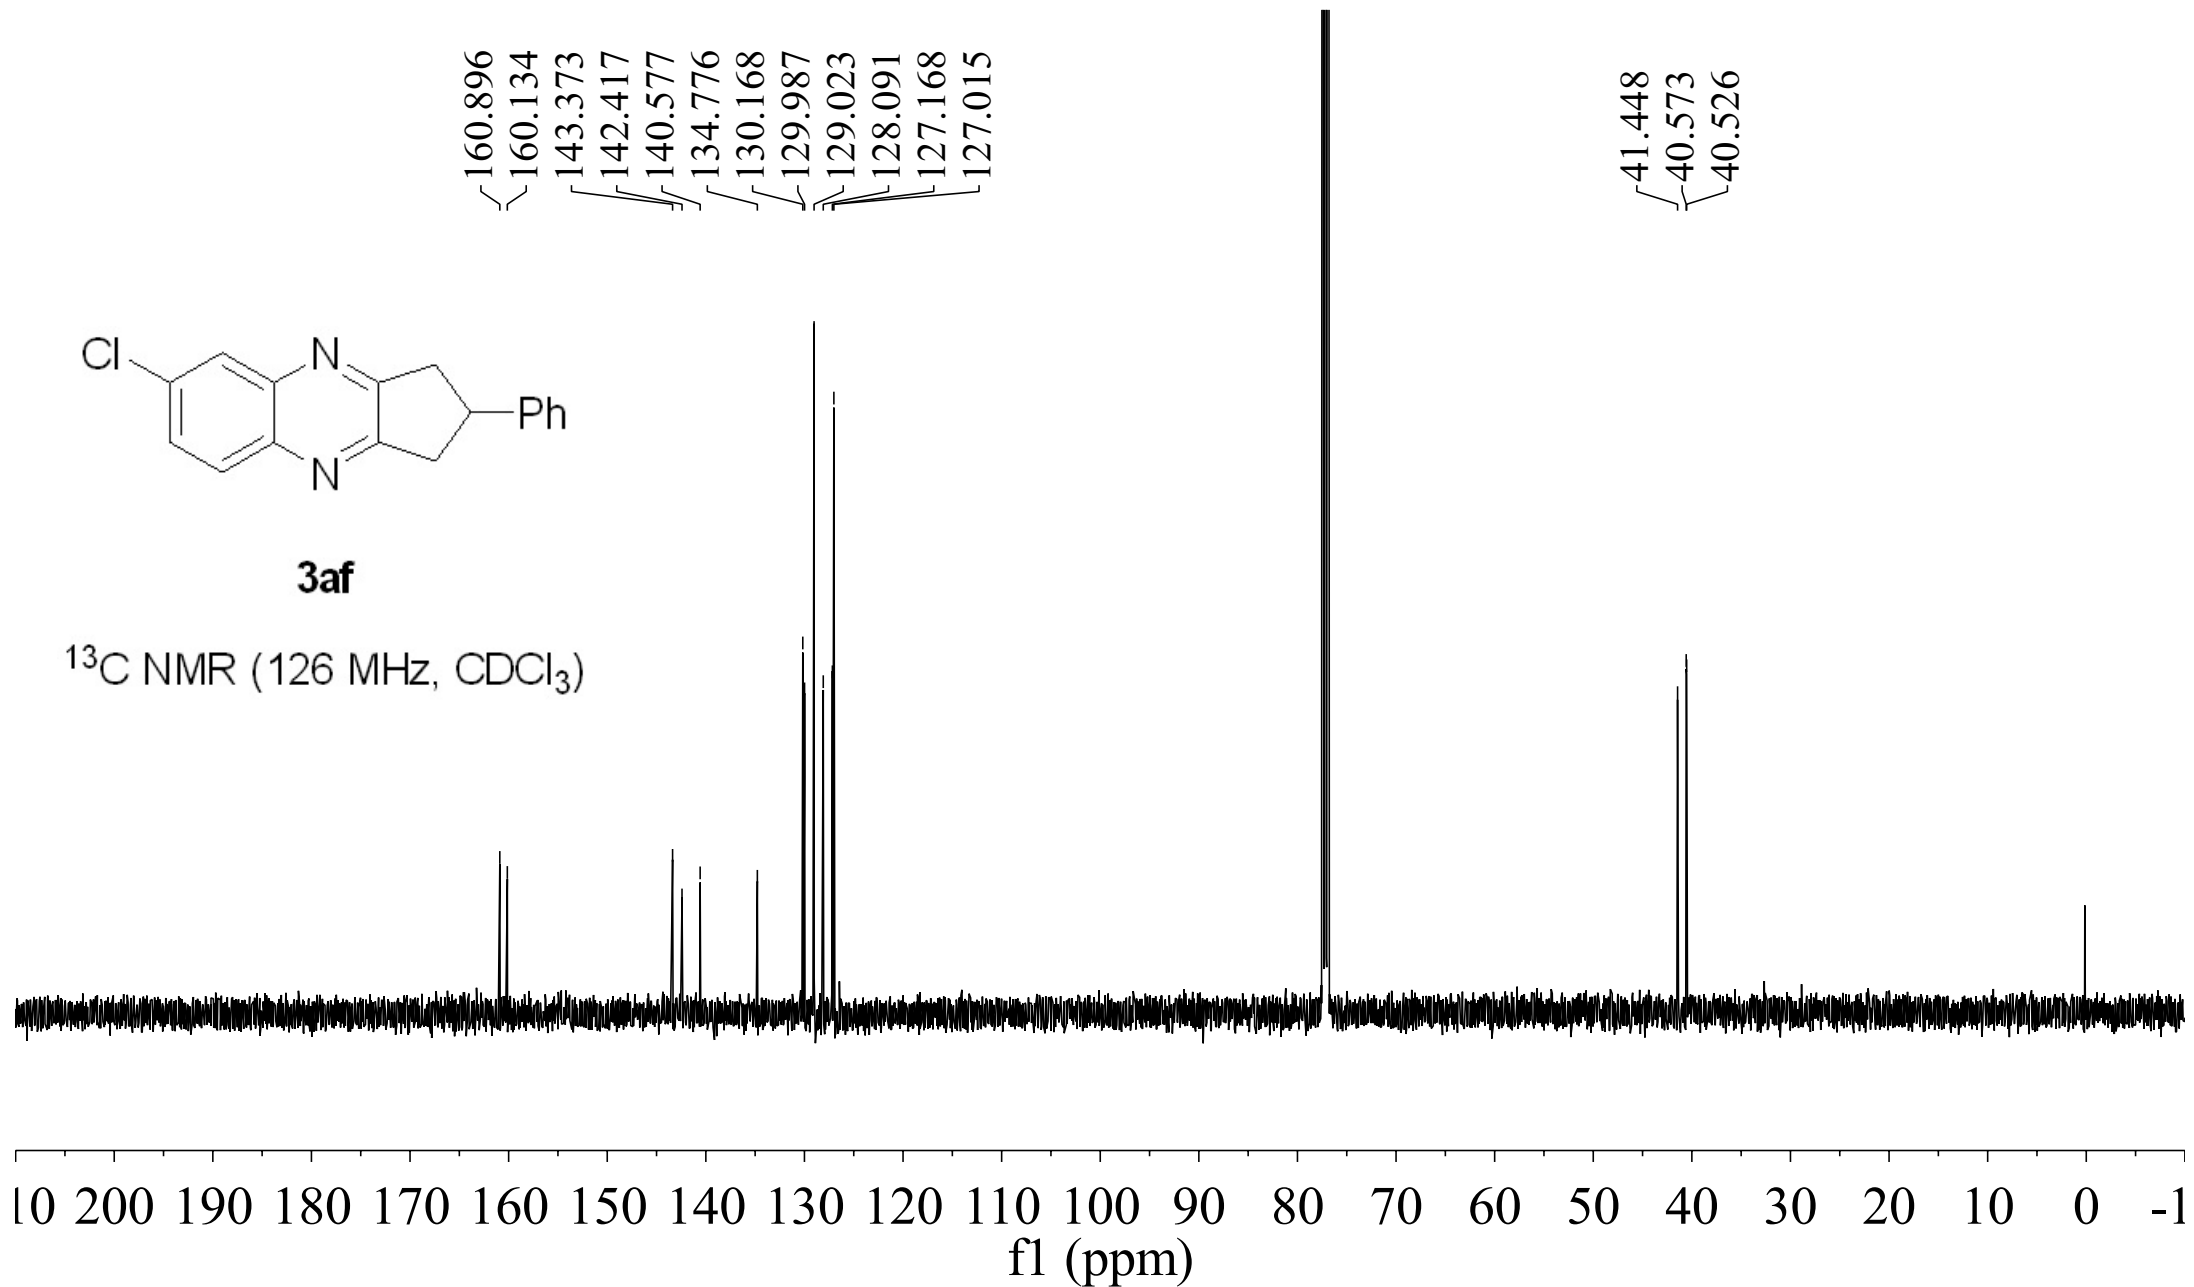

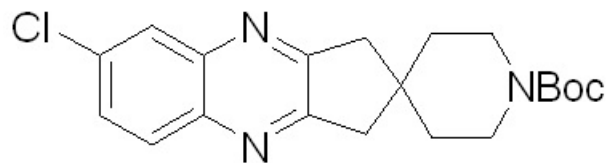

**3ag**

<sup>1</sup>H NMR (500 MHz, CDCl<sub>3</sub>)

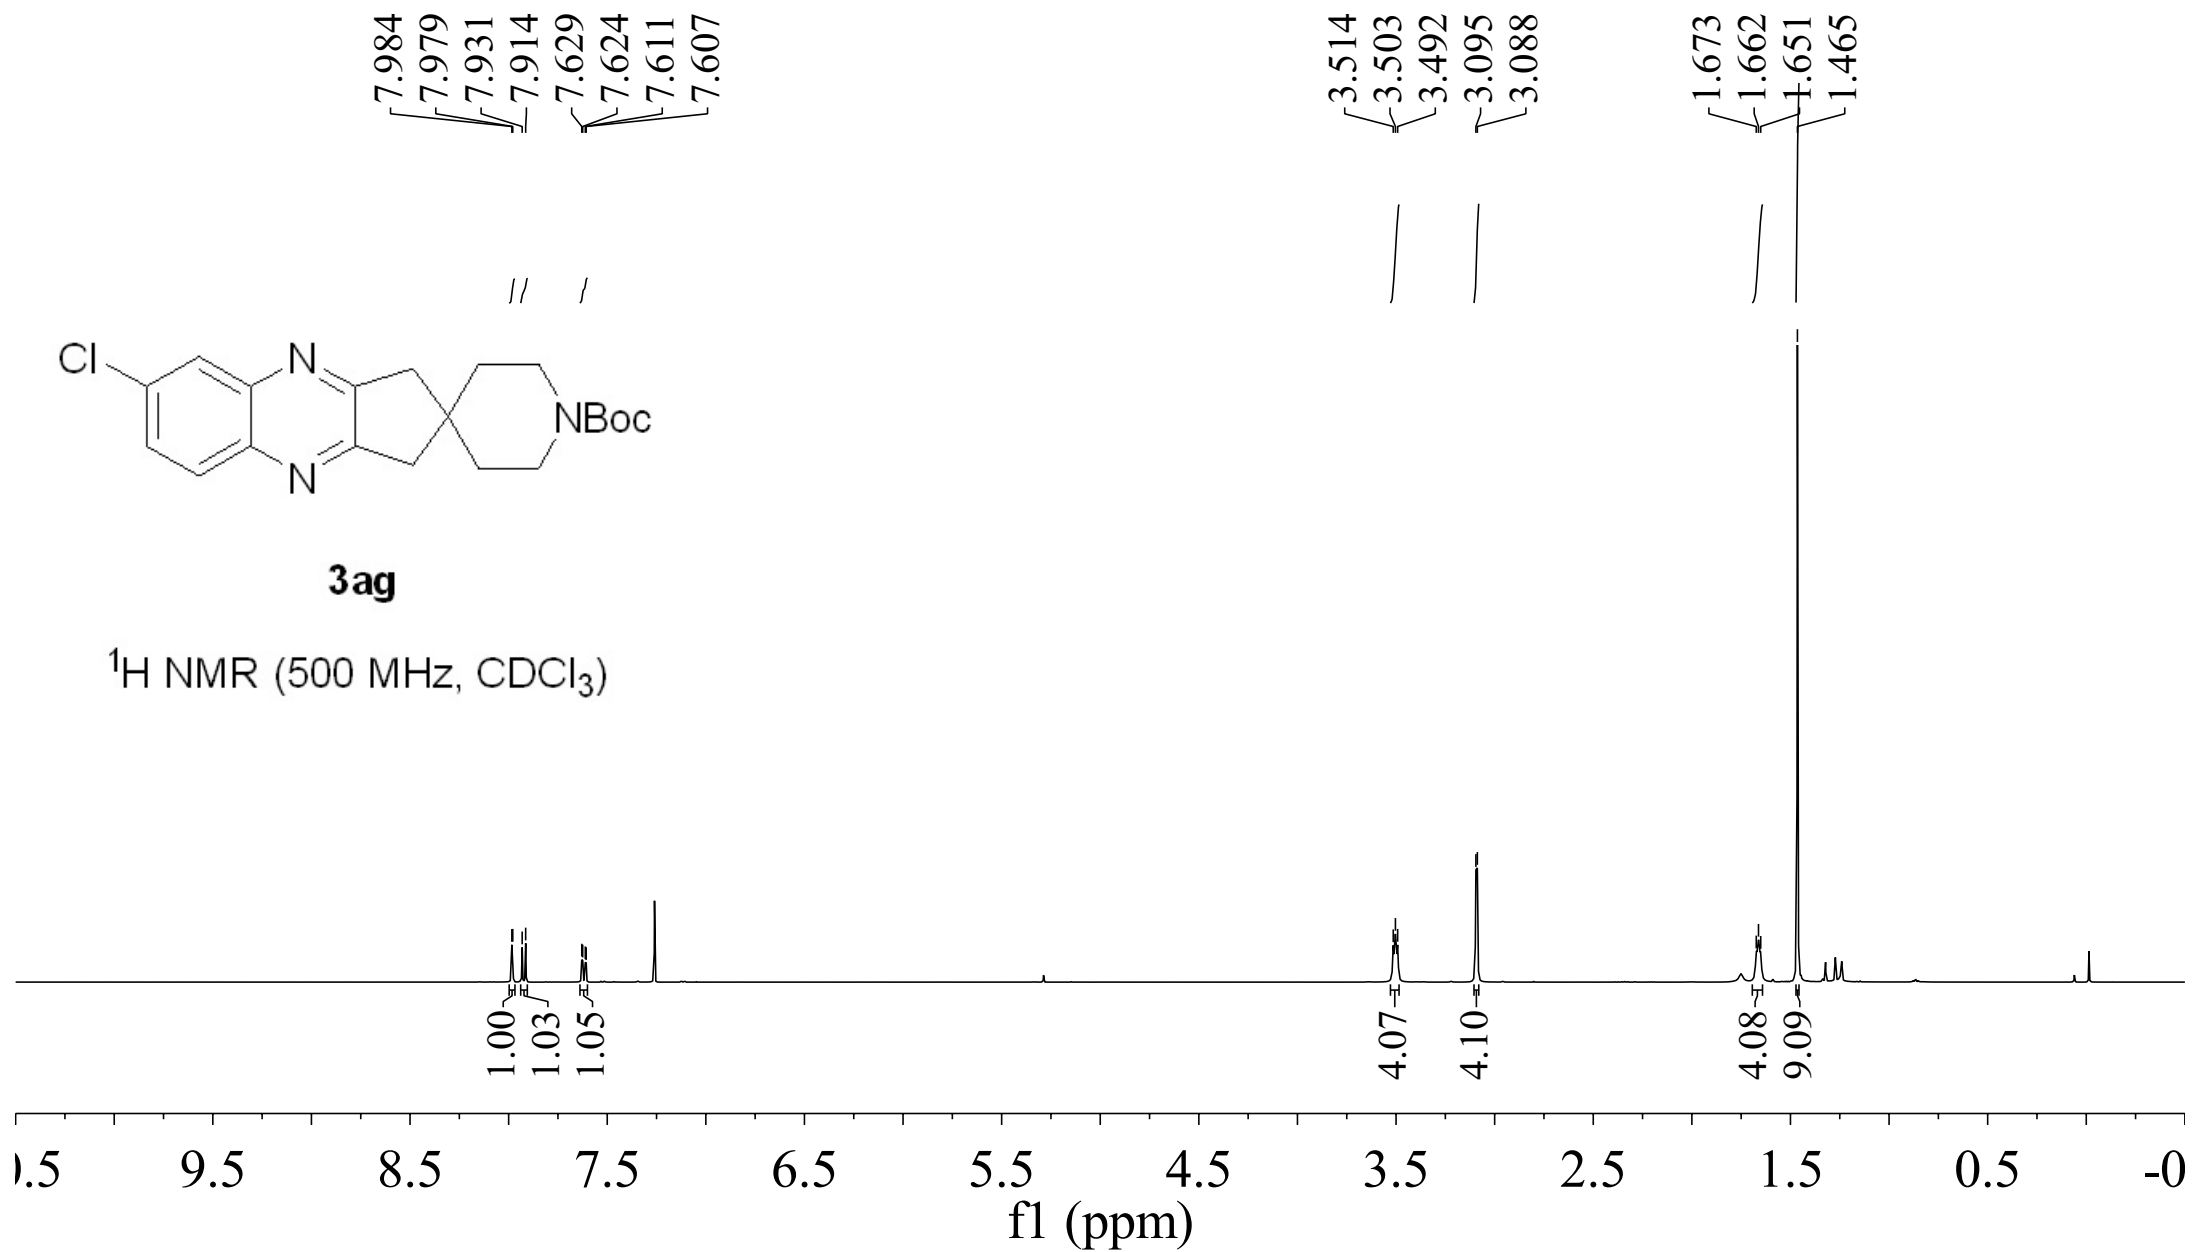

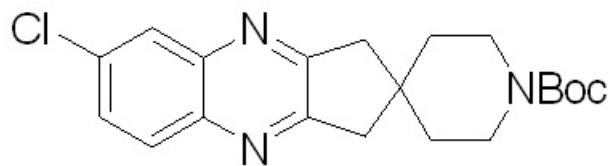

**3ag**

$^{13}\text{C}$  NMR (126 MHz,  $\text{CDCl}_3$ )

160.295  
159.528  
154.897  
142.359  
140.521  
134.756  
130.029  
129.960  
127.955

-79.861

44.265  
44.183  
39.249  
36.760  
28.587

200 190 180 170 160 150 140 130 120 110 100 90 80 70 60 50 40 30 20 10 0 -1  
f1 (ppm)

8.067  
8.063  
8.016  
7.998  
7.714  
7.709  
7.696  
7.691

5.229  
5.222

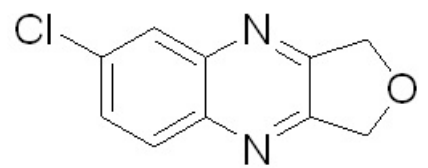

**3ah**

<sup>1</sup>H NMR (500 MHz, CDCl<sub>3</sub>)

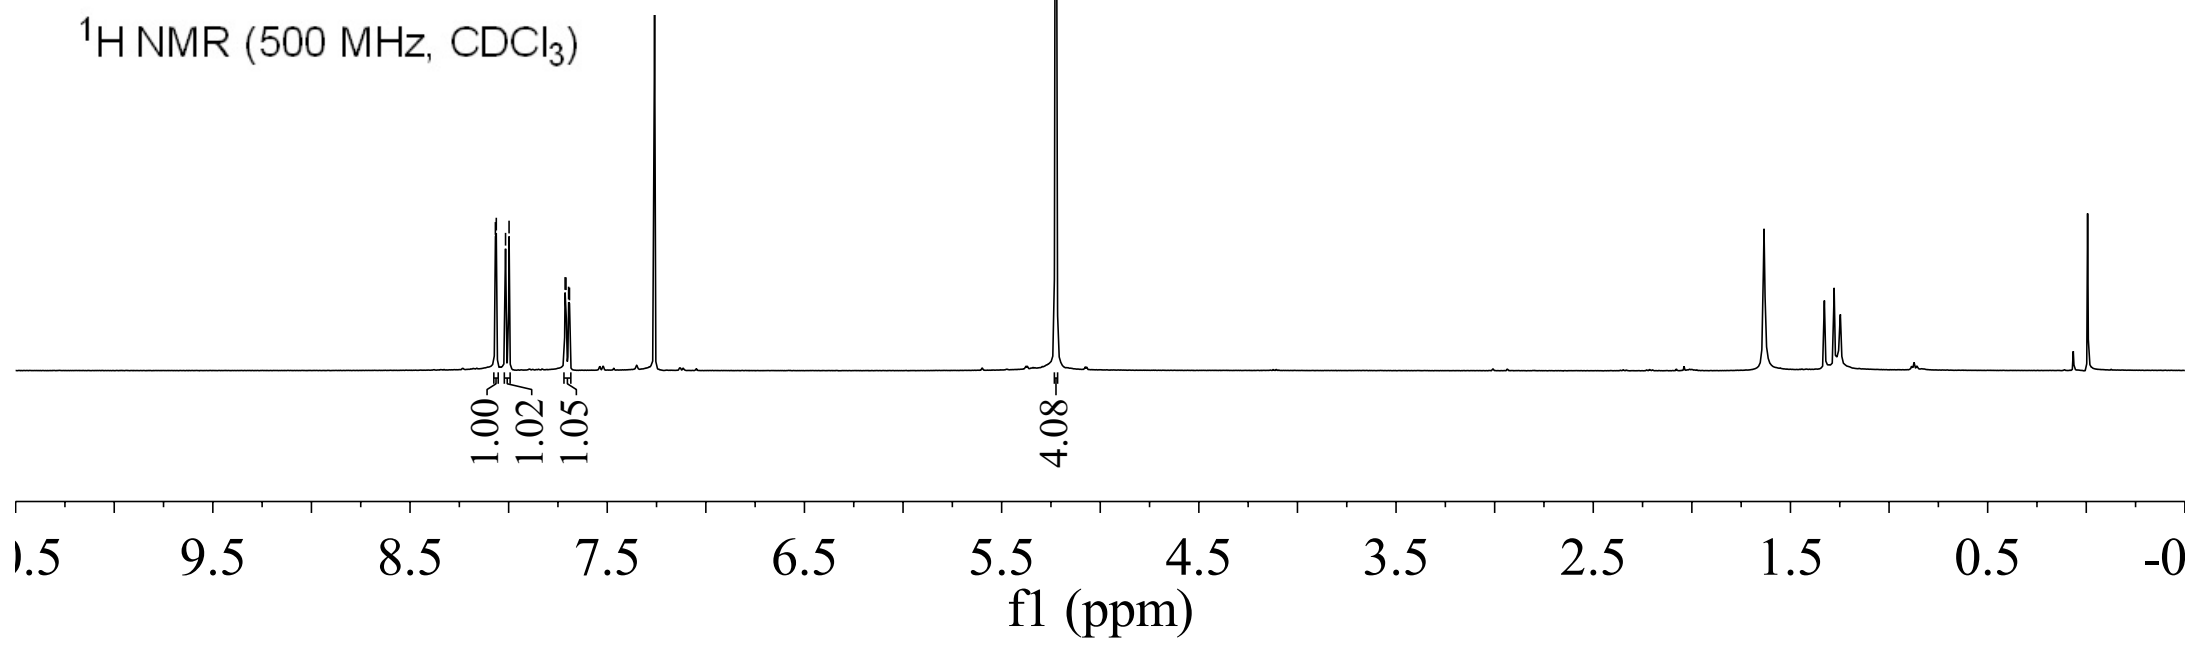

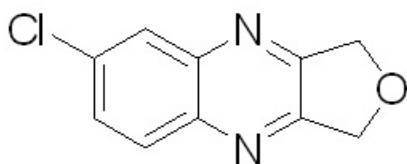

**3ah**

$^{13}\text{C}$  NMR (126 MHz,  $\text{CDCl}_3$ )

156.812  
156.064  
142.358  
140.542  
135.708  
130.850  
130.414  
128.319

71.161  
71.125



8.072  
8.067  
8.055  
8.051  
8.021  
8.003  
7.985  
7.714  
7.710  
7.706  
7.696  
7.692  
7.688  
7.447  
7.443  
7.439  
7.433  
7.430  
7.427  
7.406  
7.404  
7.400  
7.390  
7.386  
7.378  
7.374  
7.359  
7.356  
7.353  
7.347  
7.342  
7.336  
7.331  
7.328  
7.325  
5.276  
4.949  
4.941  
4.937  
4.928

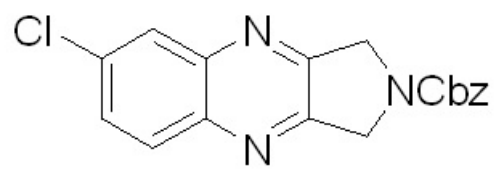

**3ai**

<sup>1</sup>H NMR (500 MHz, CDCl<sub>3</sub>)

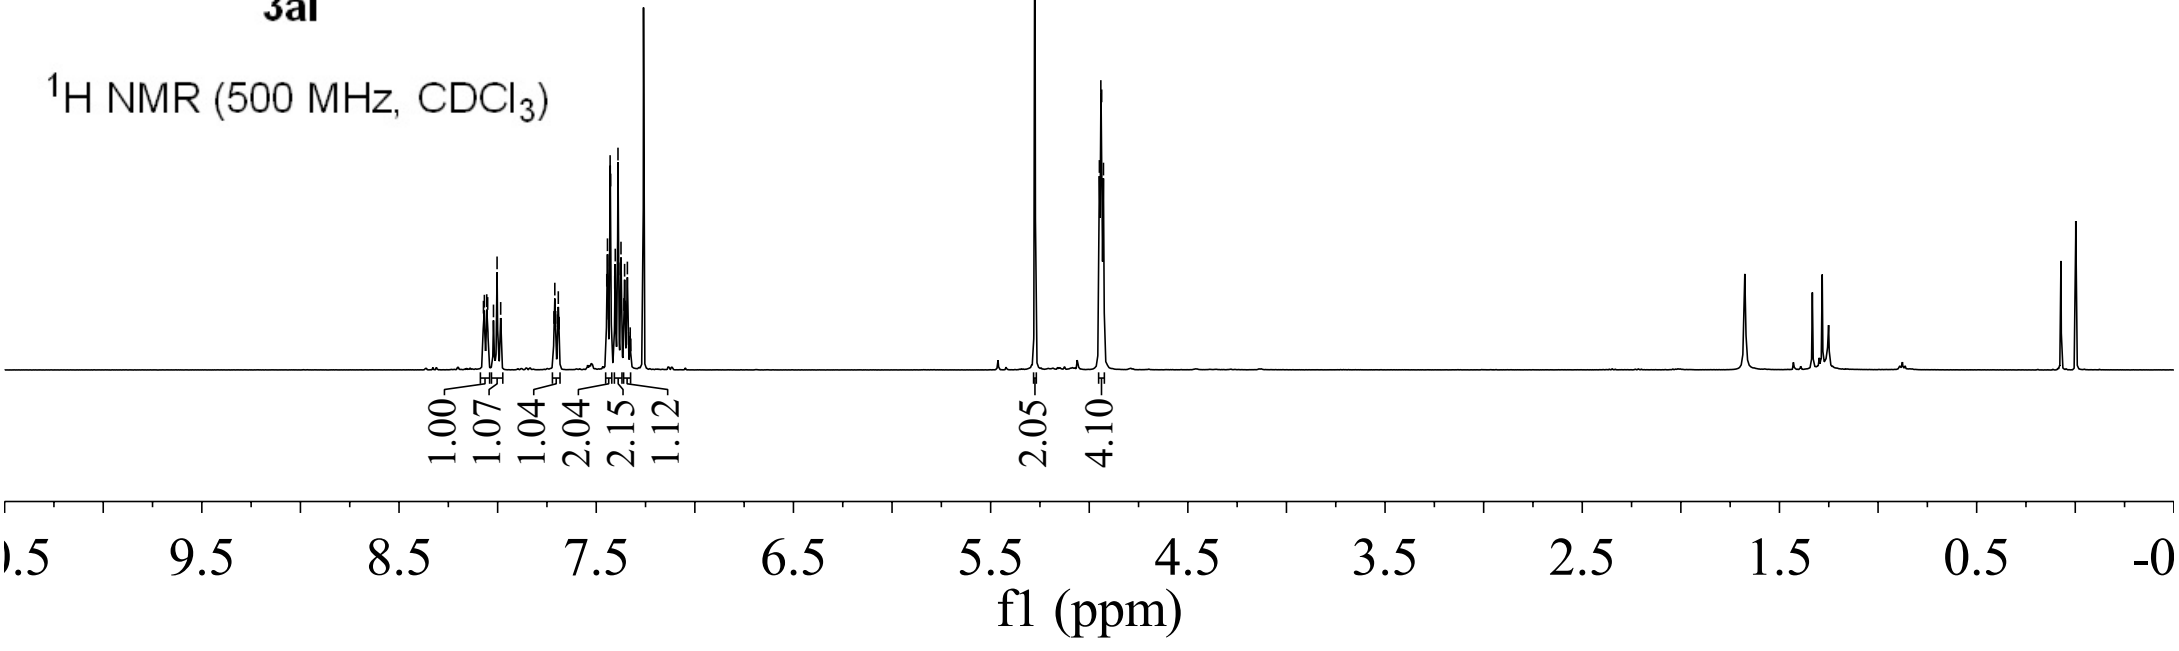

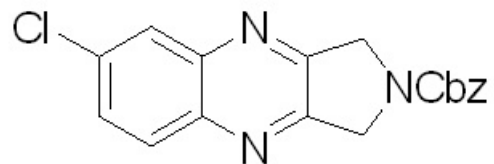

**3ai**

$^{13}\text{C}$  NMR (126 MHz,  $\text{CDCl}_3$ )

154.996  
154.365  
154.108  
153.601  
153.346  
142.552  
140.775  
136.414  
135.928  
135.888  
131.059  
131.021  
130.445  
130.396  
128.742  
128.428  
128.284  
128.244  
128.215

-67.712

51.247  
51.193  
51.033  
50.979



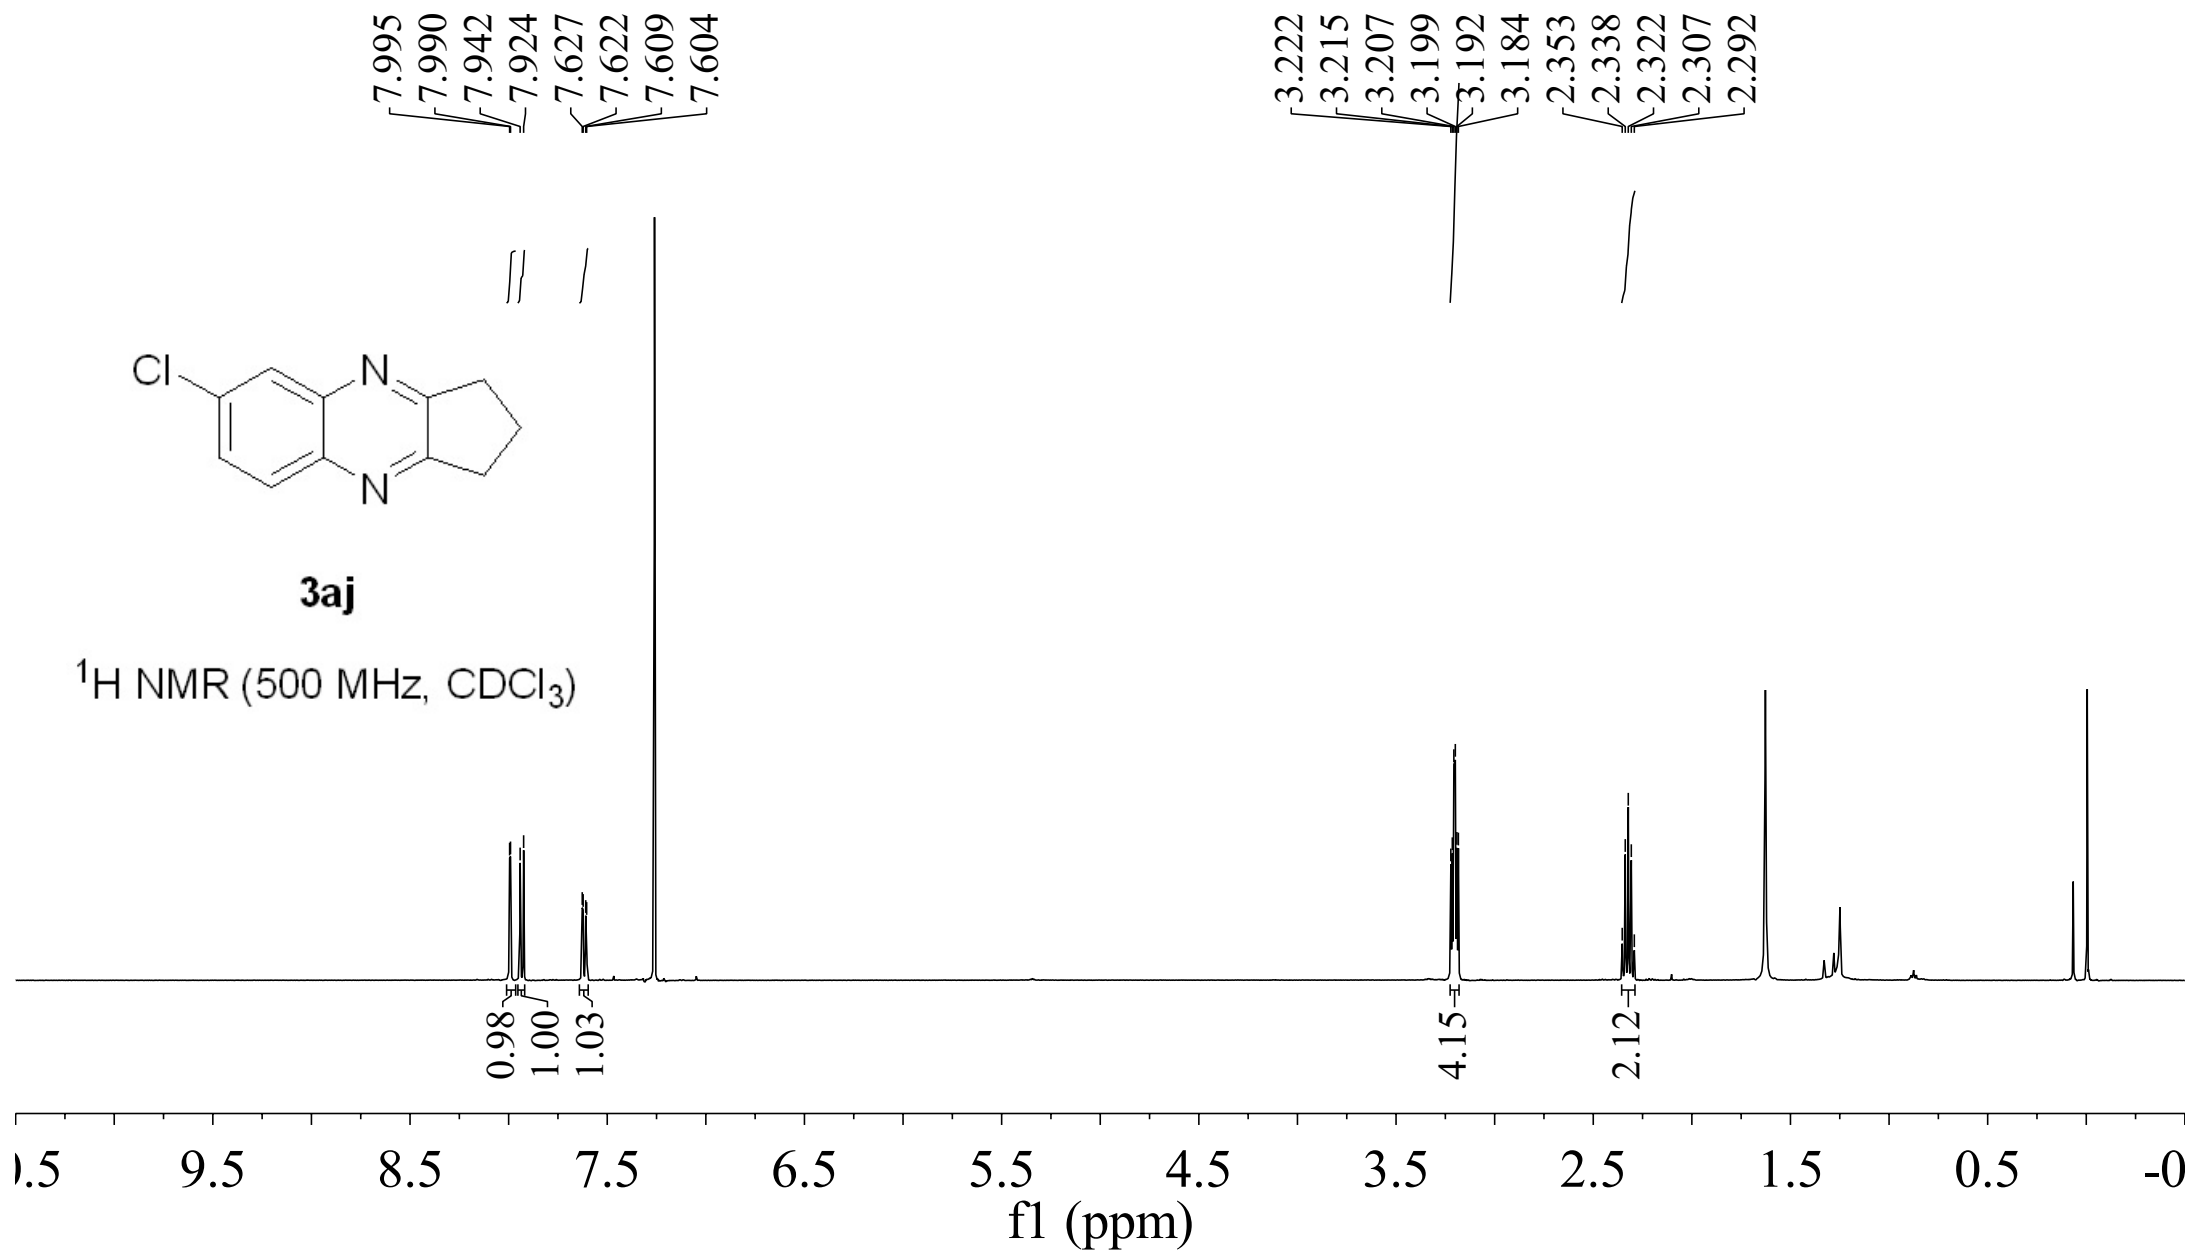



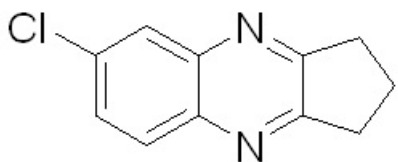

**3aj**

$^{13}\text{C}$  NMR (126 MHz,  $\text{CDCl}_3$ )

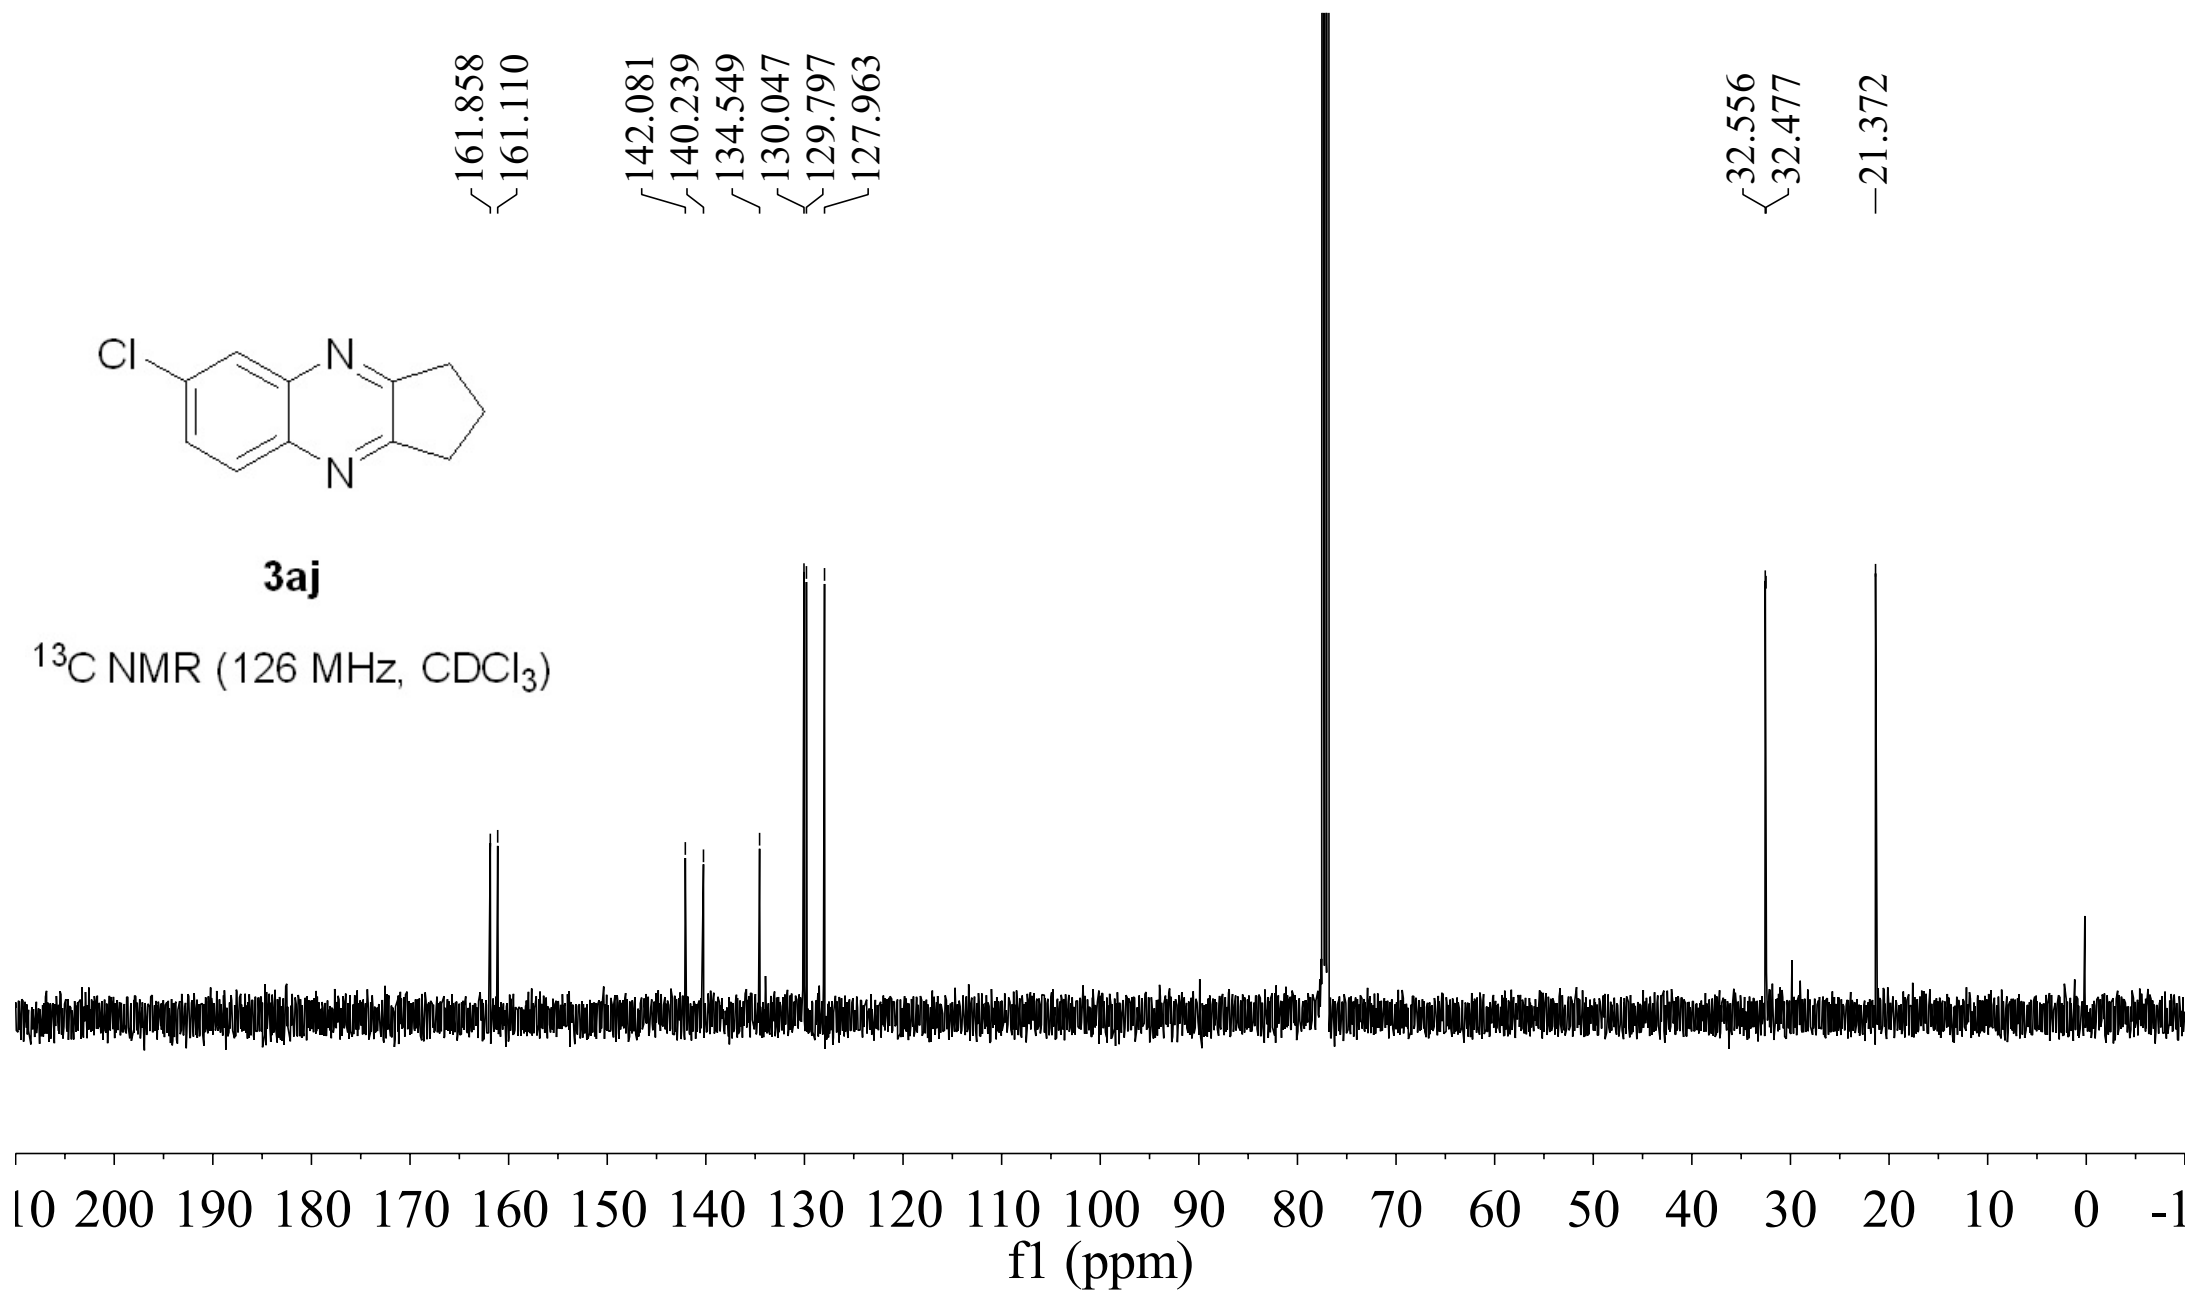

Supplement: c9cc05655f1.pdf [file c9cc05655f1.pdf]
